# Supplementary material for: Programmable synthesis of alkaloidal frameworks integrating Michael acceptor generates covalent probes for targeting POLE3 in HBV replication
Source: Royal Society of Chemistry journal article supplement (doi:10.1039/d5cb00268k), 2025-10-21
Supplement: d5cb00268k1.xlsx [file d5cb00268k1.xlsx]

## Sheet: 1
Database : NCBIprot 20220703 (490684465 sequences; 189905115401 residues)
Taxonomy : Homo sapiens (human) (438061 sequences)
Enzyme : Trypsin
Variable modifications : Acetyl (Protein N-term),Oxidation (M),Gln->pyro-Glu (N-term Q),Carbamidomethyl (C)
Mass values : Monoisotopic
Protein Mass : Unrestricted
Peptide Mass Tolerance : ± 15 ppm
Fragment Mass Tolerance: ± 30 mmu
Max Missed Cleavages : 3
Instrument type : ESI-TRAP
Number of queries : 7936
Protein hits :	NP_004095.4	fatty acid synthase [Homo sapiens]
	NP_006280.3	talin-1 [Homo sapiens]
	AAH07909.1	FASN protein [Homo sapiens]
	NP_006827.1	eIF-2-alpha kinase activator GCN1 [Homo sapiens]
	AAG41947.1	keratin 1 [Homo sapiens]
	NP_000412.4	keratin, type I cytoskeletal 10 isoform 1 [Homo sapiens]
	NP_004332.2	CAD protein isoform 1 [Homo sapiens]
	NP_003119.2	spectrin beta chain, non-erythrocytic 1 isoform 1 [Homo sapiens]
	NP_000217.2	keratin, type I cytoskeletal 9 [Homo sapiens]
	NP_000692.2	sodium/potassium-transporting ATPase subunit alpha-1 isoform a [Homo sapiens]
	NP_000414.2	keratin, type II cytoskeletal 2 epidermal [Homo sapiens]
	EAX00324.1	echinoderm microtubule associated protein like 4 [Homo sapiens]
	NP_000517.3	keratin, type I cytoskeletal 14 [Homo sapiens]
	NP_001143.2	ADP/ATP translocase 2 [Homo sapiens]
	Q5VTE0.1	PUTATIVE PSEUDOGENE: RecName: Full=Putative elongation factor 1-alpha-like 3; Short=EF-1-alpha-like 3; AltName: Full=Eukaryotic elongation factor 1 A-like 3; Short=eEF1A-like 3; AltName: Full=Eukaryotic translation elongation factor 1 alpha-1 pseudo
	NP_001035887.1	monocarboxylate transporter 4 [Homo sapiens]
	NP_008835.5	DNA-dependent protein kinase catalytic subunit isoform 1 [Homo sapiens]
	NP_005546.2	keratin, type II cytoskeletal 6B [Homo sapiens]
	BAA22563.1	PRP8 protein [Homo sapiens]
	NP_002265.3	keratin, type I cytoskeletal 13 isoform b [Homo sapiens]
	NP_000468.1	albumin preproprotein [Homo sapiens]
	AAB05994.1	putative transmembrane protein precursor [Homo sapiens]
	NP_001448.2	filamin-B isoform 2 [Homo sapiens]
	NP_004475.1	glypican-3 isoform 2 precursor [Homo sapiens]
	NP_001672.1	sarcoplasmic/endoplasmic reticulum calcium ATPase 2 isoform a [Homo sapiens]
	NP_002282.2	laminin subunit beta-1 precursor [Homo sapiens]
	NP_006507.2	solute carrier family 2, facilitated glucose transporter member 1 [Homo sapiens]
	NP_001667.4	potassium-transporting ATPase alpha chain 2 isoform 2 [Homo sapiens]
	BAG35744.1	unnamed protein product [Homo sapiens]
	NP_001447.2	filamin-A isoform 1 [Homo sapiens]
	BAC11519.1	unnamed protein product [Homo sapiens]
	AAH00062.1	Solute carrier family 1 (neutral amino acid transporter), member 5 [Homo sapiens]
	NP_005879.1	phosphate carrier protein, mitochondrial isoform a precursor [Homo sapiens]
	NP_002942.2	dolichyl-diphosphooligosaccharide--protein glycosyltransferase subunit 2 isoform 1 precursor [Homo sapiens]
	AAP94122.1	acetyl-CoA carboxylase 1 [Homo sapiens]
	BAC03596.1	unnamed protein product [Homo sapiens]
	BAC11277.1	unnamed protein product [Homo sapiens]
	CAA52817.1	AHNAK-related protein, partial [Homo sapiens]
	AAA69898.1	AHNAK, partial [Homo sapiens]
	BAH12782.1	unnamed protein product [Homo sapiens]
	EAX00129.1	reticulon 4, isoform CRA_h [Homo sapiens]
	NP_004406.2	desmoplakin isoform I [Homo sapiens]
	5VYC_f1	Chain f1, Ribosomal protein S27a [Homo sapiens]
	BAA07892.3	KIAA0097 protein [Homo sapiens]
	BAB15438.1	unnamed protein product [Homo sapiens]
	BAA37142.1	Acyl-CoA synthetase 3 [Homo sapiens]
	AAI37478.1	Adenosine deaminase, RNA-specific, B2 (RED2 homolog rat) [Homo sapiens]
	EAW51804.1	splicing factor 3b, subunit 3, 130kDa, isoform CRA_b [Homo sapiens]
	BAS02858.1	T cell receptor alpha chain V-J-region, partial [Homo sapiens]
	CAD89906.1	hypothetical protein [Homo sapiens]
	AAG01393.1	LENG1 protein, partial [Homo sapiens]
	EAX05861.1	hypothetical protein MGC35043, isoform CRA_a [Homo sapiens]
	Q96Q06.2	RecName: Full=Perilipin-4; AltName: Full=Adipocyte protein S3-12 [Homo sapiens]
	CAA34595.1	KUP protein [Homo sapiens]
1.	NP_004095.4 Mass: 273254 Score: 6881 Matches: 159(159) Sequences: 96(96) emPAI: 2.43
	fatty acid synthase [Homo sapiens]
	Query	Observed	Mr(expt)	Mr(calc)	ppm	Miss	Score	Expect	Rank	Unique	Peptide
	4923	375.2149	748.4153	748.4153	0.06	0	43	0.0027	1	U	K.LMSAISK.T
	5000	383.2125	764.4104	764.4102	0.22	0	(36)	0.018	1	U	K.LMSAISK.T
	5001	765.4183	764.4110	764.4102	1.04	0	(33)	0.032	1	U	K.LMSAISK.T
	5025	386.7137	771.4128	771.4127	0.19	0	(39)	0.013	1	U	R.TPEAVQK.L 5027
	5026	772.4208	771.4136	771.4127	1.17	0	42	0.0069	1	U	R.TPEAVQK.L
	5139	395.7153	789.4161	789.4167	-0.73	0	39	0.026	1	U	R.LLSAACR.L
	5199	402.7266	803.4387	803.4389	-0.21	0	(37)	0.039	1		K.LQELSSK.A
	5200	804.4469	803.4396	803.4389	0.95	0	55	0.00064	1		K.LQELSSK.A
	5256	812.4039	811.3966	811.3937	3.61	0	39	0.0074	1		K.SHQGLDR.Q 5257
	5267	407.7038	813.3931	813.3916	1.91	0	41	0.004	1	U	R.CLATHGR.F 5265 5268
	5271	407.7464	813.4783	813.4782	0.08	0	(45)	0.0042	1	U	R.VMGLVPAK.G
	5334	415.7437	829.4728	829.4732	-0.42	0	50	0.0027	1	U	R.VMGLVPAK.G
	5424	423.7454	845.4762	845.4759	0.36	0	45	0.0096	1	U	K.AGLYGLPR.R
	5606	440.2092	878.4039	878.4035	0.46	0	53	0.001	1	U	R.DGAWGAFR.H 5607
	5608	879.4126	878.4053	878.4035	2.07	0	(35)	0.048	1	U	R.DGAWGAFR.H
	5611	880.4774	879.4701	879.4702	-0.03	0	40	0.012	1	U	K.LYTLQDK.A
	5616	442.2714	882.5282	882.5287	-0.61	0	41	0.0067	1	U	R.DGVVRPLK.C 5617
	5669	897.5038	896.4965	896.4967	-0.24	0	(34)	0.038	1	U	K.LSPDAIPGK.W
	5670	449.2556	896.4966	896.4967	-0.12	0	55	0.0003	1	U	K.LSPDAIPGK.W
	5712	454.2298	906.4450	906.4447	0.35	0	51	0.0016	1		R.AAEQYTPK.A
	5713	907.4528	906.4455	906.4447	0.96	0	(39)	0.028	1		R.AAEQYTPK.A
	5771	461.2435	920.4725	920.4716	1.03	0	42	0.016	1		R.QELSFAAR.S
	5809	932.5416	931.5343	931.5338	0.51	1	39	0.019	1		R.KLQELSSK.A
	5881	479.2904	956.5663	956.5655	0.83	0	39	0.031	1	U	K.GLVQALQTK.V
	5882	957.5735	956.5663	956.5655	0.84	0	(38)	0.033	1	U	K.GLVQALQTK.V
	5892	481.2692	960.5239	960.5240	-0.11	0	61	0.00024	1	U	K.TGTVSLEVR.L
	5893	961.5313	960.5240	960.5240	0.02	0	(41)	0.021	1	U	K.TGTVSLEVR.L
	5998	995.6506	994.6433	994.6426	0.66	0	(41)	0.002	1		R.VLEALLPLK.G
	5999	498.3303	994.6460	994.6426	3.35	0	42	0.0008	1		R.VLEALLPLK.G
	6049	506.8242	1011.6338	1011.6328	0.95	0	47	0.0021	1		R.VAAAVDLIIK.S 6050
	6137	519.7640	1037.5135	1037.5142	-0.61	0	(59)	0.0003	1	U	K.YSGTLNLDR.V
	6138	1038.5220	1037.5147	1037.5142	0.51	0	64	0.0001	1	U	K.YSGTLNLDR.V
	6139	1038.5471	1037.5398	1037.5393	0.49	0	(66)	5.2e-005	1	U	R.VFTTVGSAEK.R
	6140	519.7786	1037.5427	1037.5393	3.25	0	69	2.1e-005	1	U	R.VFTTVGSAEK.R
	6143	519.8319	1037.6491	1037.6485	0.66	0	34	0.018	1	U	R.GTPLISPLIK.W
	6154	521.8168	1041.6190	1041.6182	0.73	0	44	0.0081	1		R.ELNLVLSVR.E
	6156	1043.5851	1042.5778	1042.5771	0.66	0	68	4.2e-005	1	U	K.AQVADVVVSR.W
	6204	528.7590	1055.5035	1055.5036	-0.10	0	(42)	0.011	1		R.QVQPEGPYR.V
	6246	534.8008	1067.5871	1067.5863	0.80	0	(40)	0.016	1	U	R.QEPLLIGSTK.S
	6247	1069.5272	1068.5199	1068.5200	-0.03	0	(54)	0.00072	1	U	R.DPSQQELPR.L
	6248	535.2674	1068.5202	1068.5200	0.26	0	72	1.2e-005	1	U	R.DPSQQELPR.L
	6258	537.2726	1072.5306	1072.5302	0.43	0	65	7.2e-005	1		R.QVQPEGPYR.V
	6259	1073.5380	1072.5307	1072.5302	0.50	0	(42)	0.013	1		R.QVQPEGPYR.V
	6269	539.7717	1077.5288	1077.5284	0.38	0	39	0.032	1	U	R.LSFFFDFR.G
	6286	1085.6209	1084.6136	1084.6128	0.71	0	(43)	0.013	1	U	R.QEPLLIGSTK.S
	6287	543.3147	1084.6148	1084.6128	1.88	0	58	0.00042	1	U	R.QEPLLIGSTK.S
	6328	551.7953	1101.5760	1101.5753	0.65	0	(42)	0.024	1		K.YHGNVMLLR.A
	6362	558.3374	1114.6602	1114.6598	0.42	0	47	0.0035	1	U	R.SEGVVAVLLTK.K
	6366	373.5302	1117.5688	1117.5702	-1.28	0	47	0.0073	1		K.YHGNVMLLR.A
	6531	595.8243	1189.6341	1189.6343	-0.13	0	69	3.5e-005	1	U	R.SDEAVKPFGLK.V
	6537	596.7878	1191.5610	1191.5628	-1.48	0	(67)	5e-005	1	U	R.LGMLSPEGTCK.A
	6548	399.5326	1195.5759	1195.5768	-0.78	0	44	0.0096	1	U	K.QAHTMDPQLR.L
	6590	604.7867	1207.5588	1207.5577	0.92	0	70	2.2e-005	1	U	R.LGMLSPEGTCK.A
	6627	616.2626	1230.5106	1230.5088	1.47	0	75	1.5e-006	1	U	K.AFDTAGNGYCR.S
	6654	621.3550	1240.6955	1240.6928	2.20	0	58	0.0003	1	U	R.EVWALVQAGIR.D
	6665	416.5543	1246.6410	1246.6418	-0.64	0	(42)	0.021	1		K.VSVHVIEGDHR.T
	6668	624.3283	1246.6421	1246.6418	0.18	0	63	0.00017	1		K.VSVHVIEGDHR.T
	6679	626.3118	1250.6091	1250.6084	0.54	0	44	0.0084	1	U	R.FDASFFGVHPK.Q
	6708	632.3758	1262.7370	1262.7347	1.86	0	65	3.2e-005	1	U	R.LQVVDQPLPVR.G
	6747	645.7921	1289.5695	1289.5677	1.45	0	41	0.03	1	U	K.VYQWDDPDPR.L
	6751	646.8151	1291.6157	1291.6152	0.39	0	(44)	0.009	1	U	-.MEEVVIAGMSGK.L
	6757	649.8388	1297.6629	1297.6626	0.25	0	92	1.5e-007	1	U	K.VGDPQELNGITR.A
	6770	651.8405	1301.6665	1301.6649	1.22	0	67	6.4e-005	1	U	R.AALQEELQLCK.G
	6792	654.8127	1307.6109	1307.6101	0.63	0	(60)	0.0002	1	U	-.MEEVVIAGMSGK.L
	6824	661.8518	1321.6891	1321.6878	0.98	0	(46)	0.0089	1	U	R.QQEQQVPILEK.F
	6828	662.8107	1323.6068	1323.6050	1.33	0	65	6.8e-005	1	U	-.MEEVVIAGMSGK.L
	6830	444.2461	1329.7164	1329.7153	0.83	0	(48)	0.0054	1	U	R.VTAIHIDPATHR.Q
	6831	665.8655	1329.7165	1329.7153	0.90	0	(51)	0.0029	1	U	R.VTAIHIDPATHR.Q
	6832	333.4367	1329.7176	1329.7153	1.72	0	53	0.0016	1	U	R.VTAIHIDPATHR.Q
	6843	670.3649	1338.7153	1338.7143	0.75	0	62	0.00016	1	U	R.QQEQQVPILEK.F
	6859	675.8296	1349.6446	1349.6438	0.60	0	55	0.00084	1	U	K.SFYGSTLFLCR.R
	6863	676.3549	1350.6952	1350.6932	1.46	0	69	3.3e-005	1	U	R.DNLEFFLAGIGR.L
	6864	676.8721	1351.7297	1351.7282	1.11	0	73	1.1e-005	1	U	K.MVVPGLDGAQIPR.D
	6890	684.8692	1367.7238	1367.7231	0.53	0	(62)	0.00015	1	U	K.MVVPGLDGAQIPR.D
	6891	684.9042	1367.7938	1367.7925	0.93	0	82	9.2e-007	1	U	R.EGGFLLLHTLLR.G
	6892	456.9387	1367.7942	1367.7925	1.20	0	(35)	0.04	1	U	R.EGGFLLLHTLLR.G
	6922	693.8787	1385.7428	1385.7402	1.86	0	80	3.5e-006	1	U	K.GVDLVLNSLAEEK.L
	6928	694.8223	1387.6300	1387.6289	0.77	0	79	2e-006	1		K.ADEASELACPTPK.E
	6950	469.2778	1404.8117	1404.8089	1.98	0	(54)	0.0004	1		R.DLVEAVAHILGIR.D
	6951	703.4140	1404.8134	1404.8089	3.25	0	79	1.1e-006	1		R.DLVEAVAHILGIR.D
	6955	703.8774	1405.7402	1405.7388	1.02	0	79	4e-006	1	U	K.VLQGDLVMNVYR.D
	6962	704.8669	1407.7192	1407.7180	0.83	0	73	1.3e-005	1		R.LSIPTYGLQCTR.A
	6978	474.8918	1421.6537	1421.6544	-0.48	0	(44)	0.007	1	U	R.CPPGVVPACHNSK.D
	6979	711.8345	1421.6545	1421.6544	0.07	0	48	0.0024	1	U	R.CPPGVVPACHNSK.D
	6981	711.8746	1421.7347	1421.7337	0.72	0	(53)	0.0016	1	U	K.VLQGDLVMNVYR.D
	6990	713.8903	1425.7660	1425.7650	0.70	0	64	8.6e-005	1		R.SLLVNPEGPTLMR.L
	7006	721.8886	1441.7627	1441.7599	1.93	0	(52)	0.0016	1		R.SLLVNPEGPTLMR.L
	7020	486.6117	1456.8132	1456.8146	-0.97	0	61	0.00018	1	U	R.GLKPSCTIIPLMK.K
	7043	735.3552	1468.6959	1468.6947	0.84	0	81	1.9e-006	1	U	R.FPQLDSTSFANSR.D
	7085	499.2788	1494.8145	1494.8154	-0.60	1	(39)	0.03	1	U	R.RQQEQQVPILEK.F
	7086	748.4150	1494.8155	1494.8154	0.08	1	58	0.00032	1	U	R.RQQEQQVPILEK.F
	7138	384.9627	1535.8215	1535.8209	0.41	0	(53)	0.0013	1	U	K.VVEVLAGHGHLYSR.I
	7139	512.9479	1535.8218	1535.8209	0.62	0	(52)	0.0019	1	U	K.VVEVLAGHGHLYSR.I
	7140	768.9183	1535.8221	1535.8209	0.81	0	105	1e-008	1	U	K.VVEVLAGHGHLYSR.I
	7157	774.8743	1547.7340	1547.7323	1.06	0	83	1.3e-006	1	U	K.ACLDTAVENMPSLK.M
	7158	775.3973	1548.7800	1548.7784	1.05	0	74	1.7e-005	1	U	R.AFEVSENGNLVVSGK.V 7159
	7172	782.8712	1563.7279	1563.7273	0.40	0	(62)	0.00011	1	U	K.ACLDTAVENMPSLK.M
	7184	541.6504	1621.9293	1621.9291	0.17	0	52	0.00073	1	U	K.VVVQVLAEEPEAVLK.G
	7194	556.2781	1665.8126	1665.8144	-1.10	0	62	0.00019	1	U	K.SNMGHPEPASGLAALAK.V
	7199	843.4472	1684.8798	1684.8784	0.85	0	76	7.8e-006	1	U	K.GILADEDSSRPVWLK.A
	7212	576.5961	1726.7664	1726.7655	0.53	0	65	3.7e-005	1	U	R.DPETLVGYSMVGCQR.A
	7215	581.2813	1740.8221	1740.8220	0.06	0	66	5.9e-005	1	U	R.DTSFEQHVLWHTGGK.G
	7260	623.9351	1868.7835	1868.7822	0.72	0	67	1.1e-005	1	U	K.FCFTPHTEEGCLSER.A
	7261	935.3993	1868.7840	1868.7822	0.99	0	(64)	2.5e-005	1	U	K.FCFTPHTEEGCLSER.A
	7269	630.0059	1886.9958	1886.9963	-0.28	0	(39)	0.04	1	U	R.VTVAGGVHISGLHTESAPR.R
	7270	472.7578	1887.0023	1886.9963	3.17	0	59	0.00045	1	U	R.VTVAGGVHISGLHTESAPR.R
	7286	639.6623	1915.9652	1915.9640	0.66	0	(73)	1.7e-005	1	U	K.EQGVTFPSGDIQEQLIR.S
	7287	958.9907	1915.9668	1915.9640	1.47	0	112	2.1e-009	1	U	K.EQGVTFPSGDIQEQLIR.S
	7305	654.0088	1959.0045	1959.0021	1.23	0	(110)	3.6e-009	1	U	R.QGVQVQVSTSNISSLEGAR.G
	7306	980.5098	1959.0050	1959.0021	1.46	0	119	3.7e-010	1	U	R.QGVQVQVSTSNISSLEGAR.G
	7310	657.0025	1967.9857	1967.9853	0.17	0	49	0.005	1	U	R.WLSTSIPEAQWHSSLAR.T
	7385	706.0423	2115.1051	2115.1032	0.87	1	68	5.2e-005	1	U	R.RQGVQVQVSTSNISSLEGAR.G
	7387	706.3475	2116.0208	2116.0185	1.05	0	113	1.7e-009	1	U	R.GTHTGVWVGVSGSETSEALSR.D 7389
	7388	1059.0177	2116.0208	2116.0185	1.09	0	(88)	6.4e-007	1	U	R.GTHTGVWVGVSGSETSEALSR.D
	7397	717.0300	2148.0683	2148.0673	0.43	0	74	1.6e-005	1		R.AAPLDSIHSLAAYYIDCIR.Q
	7399	718.3438	2152.0096	2152.0081	0.69	0	(62)	0.00021	1	U	K.EAHLPPGAMAAVGLSWEECK.Q
	7408	723.6759	2168.0059	2168.0030	1.31	0	65	0.00011	1	U	K.EAHLPPGAMAAVGLSWEECK.Q
	7414	1094.5559	2187.0973	2187.0961	0.56	0	92	2.2e-007	1	U	R.RPTPQDSPIFLPVDDTSFR.W
	7415	730.0400	2187.0983	2187.0961	1.02	0	(65)	0.0001	1	U	R.RPTPQDSPIFLPVDDTSFR.W
	7417	731.4079	2191.2019	2191.2001	0.81	0	87	3.2e-007	1	U	R.IPGLLSPHPLLQLSYTATDR.H
	7454	1111.4993	2220.9840	2220.9820	0.89	0	86	4.8e-007	1	U	R.EACPELDYFVVFSSVSCGR.G
	7455	741.3355	2220.9845	2220.9820	1.13	0	(86)	5.1e-007	1	U	R.EACPELDYFVVFSSVSCGR.G
	7464	1117.0795	2232.1444	2232.1427	0.77	0	99	5.5e-008	1	U	K.DTVTISGPQAPVFEFVEQLR.K
	7465	745.0554	2232.1444	2232.1427	0.79	0	(87)	7e-007	1	U	K.DTVTISGPQAPVFEFVEQLR.K
	7489	1132.6683	2263.3221	2263.3052	7.45	0	119	3.4e-011	1	U	R.GLIAEAAQLGPVGGVFNLAVVLR.D
	7492	1133.0475	2264.0804	2264.0783	0.92	0	78	6.3e-006	1	U	R.DGLLENQTPEFFQDVCKPK.Y
	7493	755.7038	2264.0896	2264.0783	4.96	0	(63)	0.00018	1	U	R.DGLLENQTPEFFQDVCKPK.Y
	7513	763.0801	2286.2184	2286.2107	3.37	0	(108)	4.2e-009	1	U	R.LLLEVTYEAIVDGGINPDSLR.G
	7514	1144.1171	2286.2196	2286.2107	3.88	0	141	2.3e-012	1	U	R.LLLEVTYEAIVDGGINPDSLR.G
	7516	764.0031	2288.9873	2288.9856	0.77	0	(94)	3.7e-008	1		K.TGGAYGEDLGADYNLSQVCDGK.V
	7517	1145.5016	2288.9886	2288.9856	1.34	0	96	2.3e-008	1		K.TGGAYGEDLGADYNLSQVCDGK.V
	7578	1184.5458	2367.0770	2367.0768	0.11	0	111	1.8e-009	1	U	R.GYDYGPHFQGILEASLEGDSGR.L
	7579	790.0339	2367.0798	2367.0768	1.28	0	(92)	1.4e-007	1	U	R.GYDYGPHFQGILEASLEGDSGR.L
	7583	792.4521	2374.3344	2374.3332	0.53	0	130	9.2e-012	1	U	R.LQLNGNLQLELAQVLAQERPK.L
	7620	809.0579	2424.1518	2424.1499	0.78	0	89	5.1e-007	1	U	K.NVTFHGVLLDAFFNESSADWR.E
	7644	824.7740	2471.3003	2471.2961	1.70	0	77	6.2e-006	1	U	R.LHLSGIDANPNALFPPVEFPAPR.G
	7666	1271.6096	2541.2047	2541.2023	0.93	0	(97)	7.7e-008	1	U	R.SLYQSAGVAPESFEYIEAHGTGTK.V
	7667	848.0756	2541.2050	2541.2023	1.06	0	115	1.2e-009	1	U	R.SLYQSAGVAPESFEYIEAHGTGTK.V
	7674	852.0712	2553.1917	2553.1893	0.93	0	89	5.5e-007	1	U	R.HAQPTCPGAQLCTVYYASLNFR.D
	7709	1334.1696	2666.3246	2666.3221	0.91	0	87	9.4e-007	1	U	R.CVLLSNLSSTSHVPEVDPGSAELQK.V
	7710	889.7827	2666.3263	2666.3221	1.56	0	(57)	0.00095	1	U	R.CVLLSNLSSTSHVPEVDPGSAELQK.V
	7712	889.7867	2666.3382	2666.3340	1.57	0	90	5e-007	1	U	R.HFLLEEDKPEEPTAHAFVSTLTR.G
	7713	667.5960	2666.3547	2666.3340	7.76	0	(67)	8.7e-005	1	U	R.HFLLEEDKPEEPTAHAFVSTLTR.G
	7754	929.2050	2784.5931	2784.5790	5.06	0	51	0.00032	1	U	R.ALGLGVEQLPVVFEDVVLHQATILPK.T
	7765	1420.7128	2839.4110	2839.4068	1.46	0	(71)	3.7e-005	1	U	R.LFDHPESPTPNPTEPLFLAQAEVYK.E
	7766	947.4794	2839.4165	2839.4068	3.39	0	87	8.2e-007	1	U	R.LFDHPESPTPNPTEPLFLAQAEVYK.E
	7858	827.9404	3307.7324	3307.7313	0.32	0	71	2.8e-005	1		R.LNSVQSSERPLFLVHPIEGSTTVFHSLASR.L
	7859	662.5543	3307.7349	3307.7313	1.09	0	(50)	0.0035	1		R.LNSVQSSERPLFLVHPIEGSTTVFHSLASR.L
	7862	1110.8229	3329.4468	3329.4427	1.22	0	68	1.6e-005	1		K.LTPGCEAEAETEAICFFVQQFTDMEHNR.V
	7911	1240.6148	3718.8224	3718.8268	-1.16	0	110	3.7e-009	1	U	R.GHPLGDIVAFLTSTEPQYGQGILSQDAWESLFSR.V
2.	NP_006280.3 Mass: 269599 Score: 3568 Matches: 79(79) Sequences: 68(68) emPAI: 1.17
	talin-1 [Homo sapiens]
	Query	Observed	Mr(expt)	Mr(calc)	ppm	Miss	Score	Expect	Rank	Unique	Peptide
	4788	358.7049	715.3953	715.3977	-3.29	0	31	0.045	1	U	R.SLAQAAR.G
	4842	365.7448	729.4751	729.4748	0.32	1	49	0.00017	1	U	R.KLLSAAK.I
	4882	370.7239	739.4333	739.4341	-0.98	0	37	0.0051	1	U	R.ALAVNPR.D
	4922	375.2055	748.3965	748.3967	-0.21	0	43	0.0023	1	U	R.TVSDSIK.K
	4987	382.2207	762.4268	762.4276	-0.96	0	41	0.0036	1	U	K.AGFLDLK.D
	5219	404.2215	806.4284	806.4286	-0.25	0	43	0.007	1	U	R.QFVQSAK.E
	5329	415.2610	828.5074	828.5069	0.64	0	38	0.024	1	U	K.ISIGNVVK.T
	5841	470.7473	939.4799	939.4774	2.74	0	36	0.041	1	U	R.AEASQLGHK.V
	5857	474.2551	946.4956	946.4971	-1.58	0	57	0.00059	1	U	K.ASSLIEEAK.K
	5969	494.7875	987.5605	987.5600	0.43	0	64	0.00012	1	U	K.ALGDLISATK.A
	6044	506.3191	1010.6236	1010.6236	0.00	1	50	0.00058	1	U	K.KLEQLKPR.A
	6045	337.8819	1010.6238	1010.6236	0.15	1	(32)	0.036	1	U	K.KLEQLKPR.A
	6051	507.2547	1012.4948	1012.4937	1.03	0	62	0.00011	1	U	R.SAQPASAEPR.Q
	6123	516.3088	1030.6031	1030.6022	0.87	0	49	0.0025	1	U	K.SIAAATSALVK.A
	6176	523.7956	1045.5766	1045.5768	-0.12	1	51	0.0026	1	U	K.KEEITGTLR.K
	6210	529.3038	1056.5930	1056.5927	0.25	0	63	0.00014	1	U	K.NLGTALAELR.T
	6263	538.7526	1075.4906	1075.4903	0.25	0	45	0.0034	1	U	R.CVSCLPGQR.D
	6284	542.8401	1083.6657	1083.6652	0.54	0	61	0.0001	1	U	K.AVASAAAALVLK.A
	6288	543.3193	1084.6241	1084.6240	0.08	0	66	5.7e-005	1	U	K.GLAGAVSELLR.S
	6381	562.2567	1122.4987	1122.4975	1.07	0	63	6.1e-005	1	U	K.CTQDLGNSTK.A
	6415	570.8033	1139.5920	1139.5935	-1.27	0	(56)	0.00064	1	U	R.ALEATTEHIR.Q
	6416	380.8714	1139.5925	1139.5935	-0.88	0	66	6.3e-005	1	U	R.ALEATTEHIR.Q
	6433	573.3118	1144.6091	1144.6088	0.29	0	54	0.0012	1	U	K.EVANSTANLVK.T
	6475	581.7598	1161.5051	1161.5051	0.04	0	78	2.2e-006	1	U	R.EGTETFADHR.E
	6553	599.3272	1196.6399	1196.6401	-0.17	0	67	4.2e-005	1	U	K.ALSTDPAAPNLK.S
	6581	603.2626	1204.5106	1204.5077	2.38	0	56	0.00015	1	U	K.HTSALCNSCR.L
	6608	610.3091	1218.6036	1218.6026	0.80	0	82	1.8e-006	1	U	R.MATNAAAQNAIK.K
	6614	610.8511	1219.6877	1219.6846	2.55	0	41	0.015	1	U	K.VMVTNVTSLLK.T
	6617	611.7886	1221.5627	1221.5626	0.14	0	80	1.8e-006	1	U	K.ALDGAFTEENR.A
	6623	614.3225	1226.6305	1226.6295	0.75	0	67	4.6e-005	1	U	K.VGDDPAVWQLK.N
	6645	618.8206	1235.6266	1235.6258	0.59	0	56	0.00079	1	U	K.STVLQQQYNR.V
	6657	622.3362	1242.6578	1242.6568	0.81	0	78	4.7e-006	1	U	K.VLVQNAAGSQEK.L
	6812	658.8439	1315.6732	1315.6732	0.01	0	72	3.7e-005	1	U	R.QEDVIATANLSR.R
	6855	450.5453	1348.6141	1348.6120	1.59	0	48	0.0028	1	U	K.AAGHPGDPESQQR.L
	6856	675.3149	1348.6153	1348.6120	2.48	0	(43)	0.0095	1	U	K.AAGHPGDPESQQR.L
	6883	682.8678	1363.7210	1363.7208	0.19	1	44	0.013	1	U	K.KSTVLQQQYNR.V
	6901	689.3077	1376.6009	1376.5997	0.89	0	68	1.2e-005	1	U	K.FFYSDQNVDSR.D
	6911	460.5871	1378.7395	1378.7391	0.28	0	39	0.033	1	U	K.VEHGSVALPAIMR.S
	6934	696.7976	1391.5805	1391.5800	0.36	0	89	8.7e-008	1	U	K.ADAEGESDLENSR.K
	6959	470.2377	1407.6913	1407.6895	1.25	0	53	0.0014	1	U	R.DPPSWSVLAGHSR.T
	6969	708.8945	1415.7745	1415.7732	0.91	0	93	1.4e-007	1	U	K.LAQAAQSSVATITR.L
	6997	717.8667	1433.7188	1433.7184	0.30	0	58	0.00047	1	U	K.VLGEAMTGISQNAK.N
	7013	485.2405	1452.6998	1452.6997	0.05	0	(43)	0.012	1	U	K.EAAYHPEVAPDVR.L
	7014	727.3577	1452.7008	1452.6997	0.73	0	46	0.0062	1	U	K.EAAYHPEVAPDVR.L
	7016	728.3856	1454.7567	1454.7551	1.06	0	68	3.9e-005	1	U	K.ASAGPQPLLVQSCK.A
	7019	728.9229	1455.8313	1455.8297	1.10	0	78	2.9e-006	1	U	R.ILAQATSDLVNAIK.A
	7022	730.4019	1458.7892	1458.7864	1.87	0	96	8.9e-008	1	U	K.QVAASTAQLLVACK.V
	7042	734.8414	1467.6683	1467.6664	1.31	0	68	2.5e-005	1	U	K.AGALQCSPSDAYTK.K
	7062	494.9277	1481.7612	1481.7661	-3.29	0	(48)	0.0035	1	U	R.VQELGHGCAALVTK.A
	7063	741.8904	1481.7662	1481.7661	0.11	0	67	5.1e-005	1	U	R.VQELGHGCAALVTK.A
	7071	743.9003	1485.7860	1485.7827	2.20	0	58	0.00058	1	U	K.EVIQEWNLTNIK.R
	7079	746.9460	1491.8775	1491.8773	0.15	0	78	1.1e-006	1	U	K.AVAEQIPLLVQGVR.G
	7109	506.2633	1515.7682	1515.7681	0.03	0	75	1.1e-005	1	U	R.IGITNHDEYSLVR.E
	7116	761.4304	1520.8463	1520.8450	0.87	0	90	2.7e-007	1	U	K.TLAESALQLLYTAK.E
	7117	508.5664	1522.6773	1522.6760	0.85	0	(54)	0.00053	1	U	K.GAAAHPDSEEQQQR.L
	7118	762.3461	1522.6777	1522.6760	1.11	0	55	0.00042	1	U	K.GAAAHPDSEEQQQR.L
	7127	764.9286	1527.8426	1527.8409	1.12	0	66	6.3e-005	1	U	R.DPVQLNLLYVQAR.D
	7149	515.2516	1542.7329	1542.7314	0.97	0	(49)	0.0027	1	U	R.DDILNGSHPVSFDK.A
	7150	772.3738	1542.7331	1542.7314	1.09	0	73	1.2e-005	1	U	R.DDILNGSHPVSFDK.A
	7161	518.2708	1551.7906	1551.7893	0.86	0	(38)	0.049	1	U	R.EQGVEEHETLLLR.R
	7162	776.9034	1551.7923	1551.7893	1.98	0	81	2.2e-006	1	U	R.EQGVEEHETLLLR.R
	7205	570.9664	1709.8775	1709.8770	0.24	0	43	0.016	1	U	K.TLSHPQQMALLDQTK.T
	7229	891.9716	1781.9286	1781.9272	0.79	0	106	7.3e-009	1	U	R.DLDQASLAAVSQQLAPR.E
	7293	968.4639	1934.9132	1934.9109	1.20	0	125	1e-010	1	U	K.EADESLNFEEQILEAAK.S
	7323	665.6802	1994.0189	1994.0181	0.41	0	81	2.8e-006	1	U	K.QAAASATQTIAAAQHAASTPK.A
	7339	676.3558	2026.0455	2026.0443	0.59	0	(46)	0.011	1	U	R.LNEAAAGLNQAATELVQASR.G
	7340	1014.0304	2026.0462	2026.0443	0.97	0	136	1.1e-011	1	U	R.LNEAAAGLNQAATELVQASR.G
	7341	1017.5110	2033.0074	2033.0065	0.43	0	95	1.1e-007	1	U	R.LLSDSLPPSTGTFQEAQSR.L
	7362	1031.4988	2060.9830	2060.9797	1.62	0	118	7.1e-010	1	U	K.AVEGCVSASQAATEDGQLLR.G
	7390	708.0671	2121.1796	2121.1793	0.13	0	54	0.00052	1	U	K.LLAALLEDEGGSGRPLLQAAK.G
	7393	1070.5575	2139.1004	2139.0994	0.48	0	136	8.1e-012	1	U	K.VVAPTISSPVCQEQLVEAGR.L
	7420	732.4033	2194.1881	2194.1845	1.66	0	(46)	0.0055	1	U	K.LGAASLGAEDPETQVVLINAVK.D
	7421	1098.1024	2194.1903	2194.1845	2.64	0	96	5.2e-008	1	U	K.LGAASLGAEDPETQVVLINAVK.D
	7480	1125.0386	2248.0626	2248.0607	0.82	0	134	1.2e-011	1	U	K.SNTSPEELGPLANQLTSDYGR.L
	7537	773.0474	2316.1203	2316.1202	0.03	1	60	0.00037	1	U	R.DKAPGQLECETAIAALNSCLR.D
	7610	805.0692	2412.1858	2412.1849	0.37	1	55	0.0011	1	U	R.IPEAPAGPPSDFGLFLSDDDPKK.G
	7643	823.7750	2468.3031	2468.3010	0.83	0	90	2.6e-007	1	U	R.GVAALTSDPAVQAIVLDTASDVLDK.A
	7679	858.4516	2572.3330	2572.3245	3.30	0	93	2.1e-007	1	U	K.AVSSAIAQLLGEVAQGNENYAGIAAR.D
	7680	1287.1741	2572.3336	2572.3245	3.54	0	(42)	0.024	1	U	K.AVSSAIAQLLGEVAQGNENYAGIAAR.D
	Proteins matching the same set of peptides:
	AAF27330.1 Mass: 269486 Score: 3568 Matches: 79(79) Sequences: 68(68)
	talin [Homo sapiens]
	EAW58353.1 Mass: 269603 Score: 3568 Matches: 79(79) Sequences: 68(68)
	talin 1, isoform CRA_b [Homo sapiens]
	AQN67632.1 Mass: 271251 Score: 3568 Matches: 79(79) Sequences: 68(68)
	talin-1 [Homo sapiens]
3.	AAH07909.1 Mass: 48317 Score: 1177 Matches: 33(33) Sequences: 20(20) emPAI: 3.22
	FASN protein [Homo sapiens]
	Query	Observed	Mr(expt)	Mr(calc)	ppm	Miss	Score	Expect	Rank	Unique	Peptide
	5199	402.7266	803.4387	803.4389	-0.21	0	(37)	0.039	1		K.LQELSSK.A
	5200	804.4469	803.4396	803.4389	0.95	0	55	0.00064	1		K.LQELSSK.A
	5256	812.4039	811.3966	811.3937	3.61	0	39	0.0074	1		K.SHQGLDR.Q 5257
	5712	454.2298	906.4450	906.4447	0.35	0	51	0.0016	1		R.AAEQYTPK.A
	5713	907.4528	906.4455	906.4447	0.96	0	(39)	0.028	1		R.AAEQYTPK.A
	5771	461.2435	920.4725	920.4716	1.03	0	42	0.016	1		R.QELSFAAR.S
	5809	932.5416	931.5343	931.5338	0.51	1	39	0.019	1		R.KLQELSSK.A
	5998	995.6506	994.6433	994.6426	0.66	0	(41)	0.002	1		R.VLEALLPLK.G
	5999	498.3303	994.6460	994.6426	3.35	0	42	0.0008	1		R.VLEALLPLK.G
	6049	506.8242	1011.6338	1011.6328	0.95	0	47	0.0021	1		R.VAAAVDLIIK.S 6050
	6154	521.8168	1041.6190	1041.6182	0.73	0	44	0.0081	1		R.ELNLVLSVR.E
	6204	528.7590	1055.5035	1055.5036	-0.10	0	(42)	0.011	1		R.QVQPEGPYR.V
	6258	537.2726	1072.5306	1072.5302	0.43	0	65	7.2e-005	1		R.QVQPEGPYR.V
	6259	1073.5380	1072.5307	1072.5302	0.50	0	(42)	0.013	1		R.QVQPEGPYR.V
	6328	551.7953	1101.5760	1101.5753	0.65	0	(42)	0.024	1		K.YHGNVMLLR.A
	6366	373.5302	1117.5688	1117.5702	-1.28	0	47	0.0073	1		K.YHGNVMLLR.A
	6665	416.5543	1246.6410	1246.6418	-0.64	0	(42)	0.021	1		K.VSVHVIEGDHR.T
	6668	624.3283	1246.6421	1246.6418	0.18	0	63	0.00017	1		K.VSVHVIEGDHR.T
	6928	694.8223	1387.6300	1387.6289	0.77	0	79	2e-006	1		K.ADEASELACPTPK.E
	6950	469.2778	1404.8117	1404.8089	1.98	0	(54)	0.0004	1		R.DLVEAVAHILGIR.D
	6951	703.4140	1404.8134	1404.8089	3.25	0	79	1.1e-006	1		R.DLVEAVAHILGIR.D
	6962	704.8669	1407.7192	1407.7180	0.83	0	73	1.3e-005	1		R.LSIPTYGLQCTR.A
	6990	713.8903	1425.7660	1425.7650	0.70	0	64	8.6e-005	1		R.SLLVNPEGPTLMR.L
	7006	721.8886	1441.7627	1441.7599	1.93	0	(52)	0.0016	1		R.SLLVNPEGPTLMR.L
	7075	744.8865	1487.7584	1487.7580	0.26	0	72	1.9e-005	1	U	M.STNDTIVSGTLPQR.M
	7397	717.0300	2148.0683	2148.0673	0.43	0	74	1.6e-005	1		R.AAPLDSIHSLAAYYIDCIR.Q
	7516	764.0031	2288.9873	2288.9856	0.77	0	(94)	3.7e-008	1		K.TGGAYGEDLGADYNLSQVCDGK.V
	7517	1145.5016	2288.9886	2288.9856	1.34	0	96	2.3e-008	1		K.TGGAYGEDLGADYNLSQVCDGK.V
	7858	827.9404	3307.7324	3307.7313	0.32	0	71	2.8e-005	1		R.LNSVQSSERPLFLVHPIEGSTTVFHSLASR.L
	7859	662.5543	3307.7349	3307.7313	1.09	0	(50)	0.0035	1		R.LNSVQSSERPLFLVHPIEGSTTVFHSLASR.L
	7862	1110.8229	3329.4468	3329.4427	1.22	0	68	1.6e-005	1		K.LTPGCEAEAETEAICFFVQQFTDMEHNR.V
4.	NP_006827.1 Mass: 292524 Score: 956 Matches: 31(31) Sequences: 31(31) emPAI: 0.38
	eIF-2-alpha kinase activator GCN1 [Homo sapiens]
	Query	Observed	Mr(expt)	Mr(calc)	ppm	Miss	Score	Expect	Rank	Unique	Peptide
	4888	371.2527	740.4909	740.4908	0.06	0	31	0.0069	1	U	K.ALGLVIR.L
	4950	377.7629	753.5111	753.5112	-0.13	0	32	0.0047	1	U	K.VKPIVAK.L
	5032	386.7374	771.4602	771.4603	-0.12	0	45	0.0041	1	U	R.QIGSVIR.N
	5156	397.2445	792.4745	792.4745	-0.08	0	36	0.0034	1	U	K.LSSLFVK.C
	5622	443.2610	884.5075	884.5080	-0.54	0	42	0.01	1	U	K.IVVSNTPR.T
	5666	448.7331	895.4516	895.4512	0.44	0	35	0.045	1	U	R.ASPNTPPGR.V
	5733	456.2873	910.5600	910.5600	0.03	0	38	0.0085	1	U	R.IPIAVSGVR.G
	5759	459.2565	916.4984	916.4978	0.64	0	72	1.9e-005	1	U	R.SDTQLVVR.Q
	5773	461.2738	920.5331	920.5331	-0.00	0	36	0.03	1	U	K.LLSSLGGFK.L
	5811	467.2482	932.4819	932.4815	0.48	0	40	0.03	1	U	K.EEVQLTSK.Q
	5895	481.7382	961.4618	961.4617	0.04	0	55	0.00073	1	U	K.ADYTSHLR.S
	5980	496.2877	990.5608	990.5611	-0.28	0	51	0.0015	1	U	R.HLDQIIPR.M
	5985	496.7271	991.4396	991.4393	0.33	0	35	0.034	1	U	K.EDAGGMIQR.L
	6004	499.7843	997.5540	997.5556	-1.67	0	38	0.02	1	U	K.LTTPPVNTR.V
	6153	521.8166	1041.6187	1041.6182	0.50	0	40	0.023	1	U	K.AIITALGVER.R
	6202	527.8346	1053.6546	1053.6546	-0.00	0	52	0.00031	1	U	K.GVTSILPVLR.E
	6220	531.2849	1060.5551	1060.5553	-0.14	0	43	0.017	1	U	K.IDPEAFITR.H
	6432	572.7958	1143.5770	1143.5772	-0.14	0	37	0.046	1	U	R.EGVLTGSPEQK.E
	6477	582.2887	1162.5628	1162.5618	0.88	0	52	0.0017	1	U	K.ALADENEFVR.D
	6567	601.2980	1200.5815	1200.5809	0.54	0	44	0.0099	1	U	K.ALCDPLEEVR.E
	6680	626.3157	1250.6168	1250.6143	2.01	0	73	1.3e-005	1	U	R.QGEEVFQSLSK.I
	6722	636.3388	1270.6631	1270.6629	0.11	0	88	3.7e-007	1	U	R.QAGAEALSQAVAR.Y
	6750	646.7970	1291.5794	1291.5793	0.14	0	71	1.4e-005	1	U	K.NAPNDASYDAVR.Q
	6814	659.3549	1316.6953	1316.6936	1.30	0	60	0.00037	1	U	K.SIIQSAQQDSIK.K
	6847	448.9053	1343.6942	1343.6946	-0.32	0	61	0.00023	1	U	R.HHIETGGGQLPAK.L
	6878	680.8576	1359.7006	1359.6994	0.93	1	87	7.4e-007	1	U	M.AADTQVSETLKR.F
	7037	489.6208	1465.8405	1465.8405	0.02	0	58	0.00017	1	U	K.LYRPPPVLDALGR.V
	7045	735.9140	1469.8134	1469.8130	0.32	0	47	0.0044	1	U	K.DLAPYLPSVTPGLK.A
	7072	743.9173	1485.8200	1485.8191	0.62	0	66	6.3e-005	1	U	K.VDPLFTELLNGIR.A
	7104	757.3680	1512.7215	1512.7209	0.44	0	84	1e-006	1	U	R.VISESPPDQWEAR.C
	7220	585.6855	1754.0346	1754.0342	0.26	0	33	0.034	1	U	K.DPLPPLDPQAIKPILK.A
	Proteins matching the same set of peptides:
	AAI53882.1 Mass: 292558 Score: 956 Matches: 31(31) Sequences: 31(31)
	GCN1 general control of amino-acid synthesis 1-like 1 (yeast) [Homo sapiens]
5.	AAG41947.1 Mass: 66027 Score: 836 Matches: 17(17) Sequences: 15(15) emPAI: 0.99
	keratin 1 [Homo sapiens]
	Query	Observed	Mr(expt)	Mr(calc)	ppm	Miss	Score	Expect	Rank	Unique	Peptide
	5920	487.2667	972.5189	972.5240	-5.23	0	46	0.008	1		K.IEISELNR.V
	6126	517.2628	1032.5110	1032.5087	2.17	0	53	0.0013	1	U	R.TLLEGEESR.M
	6236	533.7620	1065.5095	1065.5090	0.41	1	51	0.0017	1		K.YEDEINKR.T
	6304	546.7570	1091.4994	1091.4956	3.46	0	92	9.6e-008	1	U	R.GSGGGSSGGSIGGR.G 6303 6305
	6383	563.2744	1124.5341	1124.5349	-0.69	0	53	0.0011	1	U	K.AEAESLYQSK.Y
	6511	590.3045	1178.5944	1178.5931	1.12	0	55	0.0011	1		K.YEELQITAGR.H
	6710	633.3231	1264.6316	1264.6299	1.31	0	68	4.3e-005	1	U	R.TNAENEFVTIK.K
	6797	436.8900	1307.6482	1307.6469	0.98	2	47	0.0055	1		R.NKYEDEINKR.T
	6845	670.8386	1339.6627	1339.6619	0.58	1	65	8.9e-005	1	U	K.SKAEAESLYQSK.Y
	6869	679.3516	1356.6887	1356.6885	0.16	0	74	1.2e-005	1	U	K.LNDLEDALQQAK.E
	6918	692.3476	1382.6806	1382.6830	-1.71	0	66	7e-005	1	U	K.SLNNQFASFIDK.V
	7053	738.3969	1474.7793	1474.7780	0.87	0	81	3.4e-006	1		R.FLEQQNQVLQTK.W
	7209	858.9305	1715.8464	1715.8438	1.51	0	86	8.3e-007	1	U	K.QISNLQQSISDAEQR.G
	7321	665.3311	1992.9713	1992.9693	0.99	0	53	0.0017	1	U	R.THNLEPYFESFINNLR.R
	7585	1192.4800	2382.9454	2382.9447	0.32	0	151	1.8e-014	1	U	R.GGGGGGYGSGGSSYGSGGGSYGSGGGGGGGR.G
	Proteins matching the same set of peptides:
	AAB47721.1 Mass: 65978 Score: 836 Matches: 17(17) Sequences: 15(15)
	keratin 1 [Homo sapiens]
	NP_006112.3 Mass: 65999 Score: 836 Matches: 17(17) Sequences: 15(15)
	keratin, type II cytoskeletal 1 [Homo sapiens]
	AFA52002.1 Mass: 66013 Score: 836 Matches: 17(17) Sequences: 15(15)
	keratin 1 [Homo sapiens]
	AFA52003.1 Mass: 66029 Score: 836 Matches: 17(17) Sequences: 15(15)
	keratin 1 [Homo sapiens]
	AFA52004.1 Mass: 65930 Score: 836 Matches: 17(17) Sequences: 15(15)
	keratin 1 [Homo sapiens]
	AFA52005.1 Mass: 66086 Score: 836 Matches: 17(17) Sequences: 15(15)
	keratin 1 [Homo sapiens]
	AFA52006.1 Mass: 66026 Score: 836 Matches: 17(17) Sequences: 15(15)
	keratin 1 [Homo sapiens]
	AFA52007.1 Mass: 66071 Score: 836 Matches: 17(17) Sequences: 15(15)
	keratin 1 [Homo sapiens]
6.	NP_000412.4 Mass: 58792 Score: 690 Matches: 18(18) Sequences: 16(16) emPAI: 1.40
	keratin, type I cytoskeletal 10 isoform 1 [Homo sapiens]
	Query	Observed	Mr(expt)	Mr(calc)	ppm	Miss	Score	Expect	Rank	Unique	Peptide
	5216	404.2027	806.3908	806.3923	-1.75	0	46	0.0031	1		R.LAADDFR.L
	5239	405.2235	808.4325	808.4330	-0.64	0	43	0.0038	1		R.LASYLDK.V
	5430	424.2292	846.4438	846.4447	-1.07	0	40	0.027	1	U	K.SEITELR.R
	5990	497.2512	992.4879	992.4927	-4.82	0	41	0.018	1	U	K.YENEVALR.Q
	6122	516.3032	1030.5918	1030.5910	0.73	0	51	0.0021	1	U	R.VLDELTLTK.A
	6298	545.7695	1089.5245	1089.5237	0.76	0	(58)	0.00043	1		K.VTMQNLNDR.L
	6337	553.7668	1105.5191	1105.5186	0.50	0	66	4.9e-005	1		K.VTMQNLNDR.L
	6349	555.2490	1108.4835	1108.4825	0.88	0	41	0.0084	1	U	K.DAEAWFNEK.S
	6485	583.2955	1164.5764	1164.5775	-0.93	0	63	0.00012	1	U	R.LENEIQTYR.S
	6569	601.3130	1200.6115	1200.6098	1.42	0	65	7.9e-005	1		R.QSVEADINGLR.R
	6640	617.8431	1233.6717	1233.6717	0.03	1	61	0.00019	1	U	R.LKYENEVALR.Q
	6641	412.2329	1233.6770	1233.6717	4.30	1	(54)	0.00074	1	U	R.LKYENEVALR.Q
	6703	631.8025	1261.5904	1261.5899	0.45	0	72	1.4e-005	1	U	R.SLLEGEGSSGGGGR.G
	6886	683.3236	1364.6327	1364.6320	0.48	0	57	0.00038	1	U	R.SQYEQLAEQNR.K
	6917	691.3281	1380.6416	1380.6408	0.53	0	71	1.9e-005	1	U	R.ALEESNYELEGK.I
	6930	695.8448	1389.6751	1389.6736	1.15	0	102	1.8e-008	1	U	K.QSLEASLAETEGR.Y
	7082	498.5830	1492.7273	1492.7270	0.21	1	44	0.017	1	U	R.SQYEQLAEQNRK.D
	7202	854.3904	1706.7662	1706.7649	0.76	0	113	1.1e-009	1	U	K.GSLGGGFSSGGFSGGSFSR.G
	Proteins matching the same set of peptides:
	CAA32649.1 Mass: 59492 Score: 690 Matches: 18(18) Sequences: 16(16)
	unnamed protein product [Homo sapiens]
	AAH34697.1 Mass: 58792 Score: 690 Matches: 18(18) Sequences: 16(16)
	Keratin 10 [Homo sapiens]
	EAW60681.1 Mass: 63308 Score: 690 Matches: 18(18) Sequences: 16(16)
	keratin 10 (epidermolytic hyperkeratosis; keratosis palmaris et plantaris), isoform CRA_b [Homo sapiens]
	NP_001366295.1 Mass: 63308 Score: 690 Matches: 18(18) Sequences: 16(16)
	keratin, type I cytoskeletal 10 isoform 2 [Homo sapiens]
	KAI2582860.1 Mass: 59588 Score: 690 Matches: 18(18) Sequences: 16(16)
	keratin 10 [Homo sapiens]
	KAI4049370.1 Mass: 58458 Score: 690 Matches: 18(18) Sequences: 16(16)
	keratin 10 [Homo sapiens]
7.	NP_004332.2 Mass: 242829 Score: 488 Matches: 14(14) Sequences: 14(14) emPAI: 0.19
	CAD protein isoform 1 [Homo sapiens]
	Query	Observed	Mr(expt)	Mr(calc)	ppm	Miss	Score	Expect	Rank	Unique	Peptide
	5761	459.7429	917.4712	917.4719	-0.82	0	44	0.017	1	U	R.VFNTGGAPR.I
	5948	490.7735	979.5325	979.5338	-1.35	0	54	0.00087	1	U	R.FLSSAAAVSK.E
	5963	493.3185	984.6224	984.6219	0.53	1	41	0.011	1	U	R.KEEILLIK.A
	6070	510.2530	1018.4914	1018.4931	-1.62	0	50	0.002	1	U	R.ELSDLESAR.Q
	6322	550.2966	1098.5786	1098.5782	0.39	0	46	0.0047	1	U	K.GEVRPELGSR.Q
	6598	605.8013	1209.5880	1209.5877	0.23	0	41	0.022	1	U	R.ASDPGLPAEEPK.E
	6606	609.3355	1216.6565	1216.6564	0.05	0	71	2.8e-005	1	U	R.HPQPGAVELAAK.H
	6624	614.8673	1227.7201	1227.7187	1.12	0	61	0.00016	1	U	K.TLGVDLVALATR.V
	6691	629.3129	1256.6113	1256.6109	0.30	0	55	0.00067	1	U	K.EATAGNPGGQTVR.E
	6743	642.8618	1283.7090	1283.7085	0.37	0	77	5e-006	1	U	M.AALVLEDGSVLR.G
	6938	466.6016	1396.7829	1396.7827	0.11	0	40	0.015	1	U	R.TPHVLVLGSGVYR.I
	7021	729.8569	1457.6993	1457.6998	-0.34	0	86	4.9e-007	1	U	R.VNEISVEVDSDPR.A
	7196	836.4437	1670.8729	1670.8727	0.14	0	76	9.7e-006	1	U	R.VLGTPVETIELTEDR.R
	7668	636.3238	2541.2661	2541.2435	8.89	0	41	0.031	1	U	R.GLPVTCEVAPHHLFLSHDDLER.L
	Proteins matching the same set of peptides:
	NP_001293008.1 Mass: 235873 Score: 488 Matches: 14(14) Sequences: 14(14)
	CAD protein isoform 2 [Homo sapiens]
8.	NP_003119.2 Mass: 274439 Score: 485 Matches: 16(16) Sequences: 16(16) emPAI: 0.20
	spectrin beta chain, non-erythrocytic 1 isoform 1 [Homo sapiens]
	Query	Observed	Mr(expt)	Mr(calc)	ppm	Miss	Score	Expect	Rank	Unique	Peptide
	4577	344.2054	686.3961	686.3963	-0.18	0	30	0.017	1	U	K.ALAVEGK.R
	5711	454.2295	906.4444	906.4447	-0.35	0	38	0.032	1	U	R.IDDIFER.S
	5735	456.7842	911.5537	911.5553	-1.65	0	37	0.019	1	U	R.VQAVVAVAR.E
	5796	465.7360	929.4574	929.4566	0.85	0	42	0.011	1	U	R.QLQEDAAR.L
	5884	479.7665	957.5185	957.5243	-6.13	0	45	0.0086	1	U	K.INAVVETGR.R
	5917	485.2956	968.5767	968.5767	-0.02	0	42	0.007	1	U	R.VAVVNQIAR.Q
	6351	555.2961	1108.5777	1108.5764	1.17	0	42	0.013	1	U	R.ITDLYTDLR.D
	6375	561.3143	1120.6141	1120.6128	1.15	0	43	0.011	1	U	K.VLVLSQDYGK.H
	6400	566.2979	1130.5813	1130.5819	-0.55	0	56	0.00096	1	U	K.VLDNAIETEK.M
	6527	595.2940	1188.5733	1188.5735	-0.10	0	57	0.00044	1	U	R.LVSDGNINSDR.I
	6576	602.3021	1202.5896	1202.5891	0.37	0	56	0.00061	1	U	R.DQNTVETLQR.M
	6756	648.8111	1295.6076	1295.6067	0.70	0	42	0.015	1	U	K.EAVCEVALDYK.K
	6803	437.5492	1309.6257	1309.6262	-0.43	0	44	0.0092	1	U	R.ALVADSHPESER.I
	7087	749.3494	1496.6843	1496.6817	1.74	0	40	0.016	1	U	K.AELFTQSCADLDK.W
	7249	611.6517	1831.9332	1831.9329	0.15	0	48	0.0058	1	U	R.QNLLSQSHAYQQFLR.D
	7266	944.4697	1886.9249	1886.9221	1.49	0	112	2.1e-009	1	U	K.EIEELQSQAQALSQEGK.S
	Proteins matching the same set of peptides:
	AAY24229.1 Mass: 268549 Score: 485 Matches: 16(16) Sequences: 16(16)
	unknown, partial [Homo sapiens]
	AAA60580.1 Mass: 274461 Score: 485 Matches: 16(16) Sequences: 16(16)
	beta-spectrin [Homo sapiens]
	AFX60968.1 Mass: 274248 Score: 485 Matches: 16(16) Sequences: 16(16)
	beta-spectrin non-erythrocytic 1 [Homo sapiens]
	BAD92985.1 Mass: 275998 Score: 485 Matches: 16(16) Sequences: 16(16)
	spectrin, beta, non-erythrocytic 1 isoform 1 variant, partial [Homo sapiens]
	KAI2523407.1 Mass: 274659 Score: 485 Matches: 16(16) Sequences: 16(16)
	spectrin beta, non-erythrocytic 1 [Homo sapiens]
	XP_005264575.1 Mass: 272746 Score: 485 Matches: 16(16) Sequences: 16(16)
	spectrin beta chain, non-erythrocytic 1 isoform X2 [Homo sapiens]
9.	NP_000217.2 Mass: 62027 Score: 461 Matches: 10(10) Sequences: 9(9) emPAI: 0.55
	keratin, type I cytoskeletal 9 [Homo sapiens]
	Query	Observed	Mr(expt)	Mr(calc)	ppm	Miss	Score	Expect	Rank	Unique	Peptide
	5239	405.2235	808.4325	808.4330	-0.64	0	43	0.0038	1		R.LASYLDK.V
	5737	457.2078	912.4010	912.4011	-0.17	0	37	0.012	1	U	R.MTLDDFR.I
	6278	541.2512	1080.4878	1080.4870	0.75	0	36	0.038	1	U	K.STMQELNSR.L
	6374	561.2947	1120.5748	1120.5764	-1.42	0	44	0.0091	1	U	R.QEYEQLIAK.N
	6461	579.2991	1156.5837	1156.5836	0.05	0	79	2.2e-006	1	U	R.QGVDADINGLR.Q
	6634	616.8025	1231.5904	1231.5906	-0.11	0	103	1.2e-008	1	U	R.SGGGGGGGLGSGGSIR.S
	6642	618.2682	1234.5219	1234.5215	0.40	0	69	1e-005	1	U	R.FSSSSGYGGGSSR.V
	7658	837.3831	2509.1274	2509.1245	1.15	0	65	5.8e-005	1	U	K.EIETYHNLLEGGQEDFESSGAGK.I
	7730	902.3924	2704.1554	2704.1539	0.54	0	(35)	0.028	1	U	R.GGGGSFGYSYGGGSGGGFSASSLGGGFGGGSR.G
	7731	1353.0855	2704.1563	2704.1539	0.90	0	134	3.1e-012	1	U	R.GGGGSFGYSYGGGSGGGFSASSLGGGFGGGSR.G
	Proteins matching the same set of peptides:
	EAW60744.1 Mass: 57526 Score: 461 Matches: 10(10) Sequences: 9(9)
	keratin 9 (epidermolytic palmoplantar keratoderma) [Homo sapiens]
	CAA82315.1 Mass: 62092 Score: 461 Matches: 10(10) Sequences: 9(9)
	cytokeratin 9 [Homo sapiens]
10.	NP_000692.2 Mass: 112824 Score: 457 Matches: 11(11) Sequences: 11(11) emPAI: 0.35
	sodium/potassium-transporting ATPase subunit alpha-1 isoform a [Homo sapiens]
	Query	Observed	Mr(expt)	Mr(calc)	ppm	Miss	Score	Expect	Rank	Unique	Peptide
	4895	372.2240	742.4334	742.4337	-0.34	0	51	0.00054	1	U	R.AAEILAR.D
	5247	406.2006	810.3866	810.3872	-0.68	0	42	0.0066	1	U	K.YGTDLSR.G
	5311	414.2350	826.4555	826.4549	0.75	0	36	0.022	1	U	R.AAVPDAVGK.C
	5956	328.1819	981.5240	981.5243	-0.31	0	38	0.027	1	U	K.LSLDELHR.K
	6292	544.3007	1086.5868	1086.5856	1.12	0	48	0.0048	1		K.LIIVEGCQR.Q
	6335	553.3040	1104.5934	1104.5927	0.57	0	62	0.00018	1	U	K.TSATWLALSR.I
	6630	616.3308	1230.6471	1230.6456	1.23	0	69	5.1e-005	1	U	R.AVAGDASESALLK.C
	6646	618.8572	1235.6998	1235.6986	0.97	0	56	0.00033	1	U	R.LNIPVSQVNPR.D
	6702	631.3438	1260.6731	1260.6714	1.33	0	62	0.00015	1	U	K.IVEIPFNSTNK.Y
	7111	760.3554	1518.6961	1518.6950	0.73	0	83	7.3e-007	1	U	R.SPDFTNENPLETR.N
	7242	906.4804	1810.9461	1810.9425	2.01	0	129	3.5e-011	1	U	R.QGAIVAVTGDGVNDSPALK.K
	Proteins matching the same set of peptides:
	BAH11971.1 Mass: 112836 Score: 457 Matches: 11(11) Sequences: 11(11)
	unnamed protein product [Homo sapiens]
	BAH12337.1 Mass: 112366 Score: 457 Matches: 11(11) Sequences: 11(11)
	unnamed protein product, partial [Homo sapiens]
	BAG37313.1 Mass: 112797 Score: 457 Matches: 11(11) Sequences: 11(11)
	unnamed protein product [Homo sapiens]
	NP_001153705.1 Mass: 112928 Score: 457 Matches: 11(11) Sequences: 11(11)
	sodium/potassium-transporting ATPase subunit alpha-1 isoform c [Homo sapiens]
	NP_001153706.1 Mass: 109480 Score: 457 Matches: 11(11) Sequences: 11(11)
	sodium/potassium-transporting ATPase subunit alpha-1 isoform d [Homo sapiens]
11.	NP_000414.2 Mass: 65393 Score: 272 Matches: 8(8) Sequences: 7(7) emPAI: 0.38
	keratin, type II cytoskeletal 2 epidermal [Homo sapiens]
	Query	Observed	Mr(expt)	Mr(calc)	ppm	Miss	Score	Expect	Rank	Unique	Peptide
	5920	487.2667	972.5189	972.5240	-5.23	0	46	0.008	1		K.IEISELNR.V
	6236	533.7620	1065.5095	1065.5090	0.41	1	51	0.0017	1		K.YEDEINKR.T
	6341	554.2752	1106.5359	1106.5356	0.24	0	44	0.0089	1		K.AQYEEIAQR.S
	6540	398.8755	1193.6046	1193.6040	0.46	2	42	0.015	1	U	K.KYEDEINKR.T
	6689	627.8089	1253.6032	1253.6001	2.55	0	77	4.1e-006	1	U	R.GFSSGSAVVSGGSR.R
	6817	440.8657	1319.5753	1319.5756	-0.21	0	41	0.01	1	U	R.HGGGGGGFGGGGFGSR.S
	6818	660.7958	1319.5771	1319.5756	1.15	0	(38)	0.021	1	U	R.HGGGGGGFGGGGFGSR.S
	7053	738.3969	1474.7793	1474.7780	0.87	0	81	3.4e-006	1		R.FLEQQNQVLQTK.W
	Proteins matching the same set of peptides:
	AAB81946.1 Mass: 65825 Score: 272 Matches: 8(8) Sequences: 7(7)
	keratin 2e [Homo sapiens]
	KAI4066109.1 Mass: 65363 Score: 272 Matches: 8(8) Sequences: 7(7)
	keratin 2 [Homo sapiens]
12.	EAX00324.1 Mass: 108834 Score: 258 Matches: 7(7) Sequences: 7(7) emPAI: 0.22
	echinoderm microtubule associated protein like 4 [Homo sapiens]
	Query	Observed	Mr(expt)	Mr(calc)	ppm	Miss	Score	Expect	Rank	Unique	Peptide
	5791	465.2508	928.4870	928.4866	0.49	0	37	0.039	1	U	K.TTVEPTPGK.G
	6578	602.8037	1203.5929	1203.5918	0.92	0	52	0.0017	1	U	K.DLLLTCAQDR.Q
	6740	428.2419	1281.7037	1281.7041	-0.28	0	76	4.6e-006	1	U	R.KPSHTSAVSIAGK.E
	6973	710.3600	1418.7054	1418.7041	0.90	0	50	0.0036	1	U	R.EIEVPDQYGTIR.A
	6993	715.3812	1428.7478	1428.7460	1.23	0	66	6.4e-005	1	U	R.VQQQEDEITVLK.A
	6994	478.5273	1432.5600	1432.5603	-0.22	0	29	0.027	1	U	K.SHNSWENSDDSR.N
	7213	577.3043	1728.8910	1728.8907	0.14	0	68	6e-005	1	U	R.ASPSPQPSSQPLQIHR.Q
	Proteins matching the same set of peptides:
	AAG09279.2 Mass: 108835 Score: 258 Matches: 7(7) Sequences: 7(7)
	cytoplasmic protein [Homo sapiens]
	NP_061936.3 Mass: 108848 Score: 258 Matches: 7(7) Sequences: 7(7)
	echinoderm microtubule-associated protein-like 4 isoform a [Homo sapiens]
	BAF73612.1 Mass: 145572 Score: 258 Matches: 7(7) Sequences: 7(7)
	fusion protein EML4-ALK variant 2 [Homo sapiens]
	KAI2523161.1 Mass: 110096 Score: 258 Matches: 7(7) Sequences: 7(7)
	EMAP like 4 [Homo sapiens]
	KAI4034308.1 Mass: 108863 Score: 258 Matches: 7(7) Sequences: 7(7)
	EMAP like 4 [Homo sapiens]
	KAI4034310.1 Mass: 110124 Score: 258 Matches: 7(7) Sequences: 7(7)
	EMAP like 4 [Homo sapiens]
	XP_005264324.1 Mass: 110109 Score: 258 Matches: 7(7) Sequences: 7(7)
	echinoderm microtubule-associated protein-like 4 isoform X1 [Homo sapiens]
	XP_005264325.1 Mass: 84832 Score: 258 Matches: 7(7) Sequences: 7(7)
	echinoderm microtubule-associated protein-like 4 isoform X4 [Homo sapiens]
13.	NP_000517.3 Mass: 51529 Score: 234 Matches: 6(6) Sequences: 5(5) emPAI: 0.42
	keratin, type I cytoskeletal 14 [Homo sapiens]
	Query	Observed	Mr(expt)	Mr(calc)	ppm	Miss	Score	Expect	Rank	Unique	Peptide
	5216	404.2027	806.3908	806.3923	-1.75	0	46	0.0031	1		R.LAADDFR.T
	5239	405.2235	808.4325	808.4330	-0.64	0	43	0.0038	1		R.LASYLDK.V
	6298	545.7695	1089.5245	1089.5237	0.76	0	(58)	0.00043	1		K.VTMQNLNDR.L
	6337	553.7668	1105.5191	1105.5186	0.50	0	66	4.9e-005	1		K.VTMQNLNDR.L
	6378	561.7935	1121.5724	1121.5717	0.64	0	58	0.00056	1		R.LEQEIATYR.R
	6986	713.3516	1424.6887	1424.6896	-0.62	0	83	1.3e-006	1	U	R.APSTYGGGLSVSSSR.F
	Proteins matching the same set of peptides:
	AAH02690.1 Mass: 51619 Score: 234 Matches: 6(6) Sequences: 5(5)
	Keratin 14 [Homo sapiens]
	AAH42437.1 Mass: 51589 Score: 234 Matches: 6(6) Sequences: 5(5)
	Keratin 14 [Homo sapiens]
14.	NP_001143.2 Mass: 32831 Score: 212 Matches: 8(8) Sequences: 8(8) emPAI: 1.08
	ADP/ATP translocase 2 [Homo sapiens]
	Query	Observed	Mr(expt)	Mr(calc)	ppm	Miss	Score	Expect	Rank	Unique	Peptide
	4462	337.1975	672.3805	672.3806	-0.24	0	46	0.0004	1	U	R.LAADVGK.A
	5461	428.7487	855.4828	855.4814	1.67	0	56	0.00041	1	U	K.TAVAPIER.V
	5682	451.7458	901.4770	901.4770	0.04	0	43	0.017	1	U	K.GAWSNVLR.G
	5866	476.2430	950.4715	950.4709	0.66	0	44	0.0076	1	U	M.TDAAVSFAK.D
	6373	561.2909	1120.5673	1120.5665	0.72	0	41	0.02	1	U	K.EQGVLSFWR.G
	6409	379.5643	1135.6711	1135.6713	-0.22	0	35	0.025	1	U	K.LLLQVQHASK.Q
	6611	610.3381	1218.6616	1218.6608	0.62	0	56	0.00064	1	U	K.DFLAGGVAAAISK.T
	7010	723.8751	1445.7357	1445.7343	0.94	0	48	0.0055	1	U	R.YFPTQALNFAFK.D
	Proteins matching the same set of peptides:
	EAW89869.1 Mass: 27614 Score: 212 Matches: 8(8) Sequences: 8(8)
	solute carrier family 25 (mitochondrial carrier; adenine nucleotide translocator), member 5, isoform CRA_b [Homo sapiens]
	NP_001253938.1 Mass: 32874 Score: 212 Matches: 8(8) Sequences: 8(8)
	ADP/ATP translocase 2 [Macaca mulatta]
15.	Q5VTE0.1 Mass: 50153 Score: 182 Matches: 6(6) Sequences: 5(5) emPAI: 0.35
	PUTATIVE PSEUDOGENE: RecName: Full=Putative elongation factor 1-alpha-like 3; Short=EF-1-alpha-like 3; AltName: Full=Eukaryotic elongation factor 1 A-like 3; Short=eEF1A-like 3; AltName: Full=Eukaryotic translation elongation factor 1 alpha-1 pseudo
	Query	Observed	Mr(expt)	Mr(calc)	ppm	Miss	Score	Expect	Rank	Unique	Peptide
	5928	488.2793	974.5441	974.5437	0.45	0	38	0.043	1	U	R.LPLQDVYK.I
	6099	513.3090	1024.6035	1024.6030	0.52	0	54	0.0004	1	U	K.IGGIGTVPVGR.V
	6806	438.9191	1313.7354	1313.7343	0.81	0	(42)	0.017	1	U	R.EHALLAYTLGVK.Q
	6807	657.8759	1313.7373	1313.7343	2.26	0	66	5.8e-005	1	U	R.EHALLAYTLGVK.Q
	6947	468.9141	1403.7205	1403.7197	0.56	0	44	0.013	1	U	K.YYVTIIDAPGHR.D
	7175	530.2988	1587.8747	1587.8733	0.85	0	42	0.017	1	U	K.THINIVVIGHVDSGK.S
	Proteins matching the same set of peptides:
	CAA34756.1 Mass: 50095 Score: 182 Matches: 6(6) Sequences: 5(5)
	unnamed protein product [Homo sapiens]
	AAH71727.1 Mass: 50153 Score: 182 Matches: 6(6) Sequences: 5(5)
	Eukaryotic translation elongation factor 1 alpha 1 [Homo sapiens]
	AAH71841.1 Mass: 50091 Score: 182 Matches: 6(6) Sequences: 5(5)
	Eukaryotic translation elongation factor 1 alpha 1 [Homo sapiens]
	BAF85328.1 Mass: 50169 Score: 182 Matches: 6(6) Sequences: 5(5)
	unnamed protein product [Homo sapiens]
	BAD96235.1 Mass: 50093 Score: 182 Matches: 6(6) Sequences: 5(5)
	eukaryotic translation elongation factor 1 alpha 1 variant, partial [Homo sapiens]
	BAD96243.1 Mass: 50167 Score: 182 Matches: 6(6) Sequences: 5(5)
	eukaryotic translation elongation factor 1 alpha 1 variant, partial [Homo sapiens]
	BAD96271.1 Mass: 50110 Score: 182 Matches: 6(6) Sequences: 5(5)
	eukaryotic translation elongation factor 1 alpha 1 variant, partial [Homo sapiens]
	BAD96702.1 Mass: 50079 Score: 182 Matches: 6(6) Sequences: 5(5)
	eukaryotic translation elongation factor 1 alpha 1 variant, partial [Homo sapiens]
	BAD96750.1 Mass: 50079 Score: 182 Matches: 6(6) Sequences: 5(5)
	eukaryotic translation elongation factor 1 alpha 1 variant, partial [Homo sapiens]
	BAD96766.1 Mass: 50081 Score: 182 Matches: 6(6) Sequences: 5(5)
	eukaryotic translation elongation factor 1 alpha 1 variant, partial [Homo sapiens]
	WP_094948604.1 Mass: 50109 Score: 182 Matches: 6(6) Sequences: 5(5)
	MULTISPECIES: translation elongation factor EF-1 subunit alpha [Gammaproteobacteria]
16.	NP_001035887.1 Mass: 49437 Score: 147 Matches: 4(4) Sequences: 4(4) emPAI: 0.28
	monocarboxylate transporter 4 [Homo sapiens]
	Query	Observed	Mr(expt)	Mr(calc)	ppm	Miss	Score	Expect	Rank	Unique	Peptide
	6521	593.3094	1184.6042	1184.6037	0.41	0	44	0.0074	1	U	M.GGAVVDEGPTGVK.A
	6717	634.8090	1267.6035	1267.6045	-0.77	0	40	0.023	1	U	K.NGEVVHTPETSV.-
	6948	468.9246	1403.7521	1403.7521	0.01	0	45	0.0081	1	U	K.LHKPPADSGVDLR.E
	6989	713.8394	1425.6643	1425.6623	1.39	0	65	6.1e-005	1	U	K.EPQPEVAAAEEEK.L
17.	NP_008835.5 Mass: 468788 Score: 147 Matches: 4(4) Sequences: 4(4) emPAI: 0.03
	DNA-dependent protein kinase catalytic subunit isoform 1 [Homo sapiens]
	Query	Observed	Mr(expt)	Mr(calc)	ppm	Miss	Score	Expect	Rank	Unique	Peptide
	5865	476.2354	950.4562	950.4556	0.59	0	49	0.0023	1	U	K.TSALSDETK.N
	6038	505.7275	1009.4405	1009.4400	0.49	0	40	0.01	1	U	K.CFGTGAAGNR.T
	6504	588.3171	1174.6197	1174.6194	0.32	0	40	0.029	1	U	R.VTELALTASDR.Q
	7038	734.3572	1466.6998	1466.7001	-0.22	0	77	6.9e-006	1	U	R.SLGPPQGEEDSVPR.D
	Proteins matching the same set of peptides:
	AAC50210.3 Mass: 465266 Score: 147 Matches: 4(4) Sequences: 4(4)
	DNA dependent protein kinase catalytic subunit [Homo sapiens]
	EAW86682.1 Mass: 468687 Score: 147 Matches: 4(4) Sequences: 4(4)
	protein kinase, DNA-activated, catalytic polypeptide, isoform CRA_c, partial [Homo sapiens]
	EAW86683.1 Mass: 458495 Score: 147 Matches: 4(4) Sequences: 4(4)
	protein kinase, DNA-activated, catalytic polypeptide, isoform CRA_d [Homo sapiens]
	NP_001075109.1 Mass: 465202 Score: 147 Matches: 4(4) Sequences: 4(4)
	DNA-dependent protein kinase catalytic subunit isoform 2 [Homo sapiens]
	KAI4010559.1 Mass: 468848 Score: 147 Matches: 4(4) Sequences: 4(4)
	protein kinase, DNA-activated, catalytic subunit [Homo sapiens]
	KAI4010560.1 Mass: 465262 Score: 147 Matches: 4(4) Sequences: 4(4)
	protein kinase, DNA-activated, catalytic subunit [Homo sapiens]
18.	NP_005546.2 Mass: 60030 Score: 133 Matches: 4(4) Sequences: 4(4) emPAI: 0.22
	keratin, type II cytoskeletal 6B [Homo sapiens]
	Query	Observed	Mr(expt)	Mr(calc)	ppm	Miss	Score	Expect	Rank	Unique	Peptide
	6236	533.7620	1065.5095	1065.5090	0.41	1	51	0.0017	1		K.YEDEINKR.T
	6341	554.2752	1106.5359	1106.5356	0.24	0	44	0.0089	1		K.AQYEEIAQR.S
	6511	590.3045	1178.5944	1178.5931	1.12	0	55	0.0011	1		K.YEELQITAGR.H
	6797	436.8900	1307.6482	1307.6469	0.98	2	47	0.0055	1		K.NKYEDEINKR.T
	Proteins matching the same set of peptides:
	EAW96626.1 Mass: 59874 Score: 133 Matches: 4(4) Sequences: 4(4)
	keratin 6B, isoform CRA_a [Homo sapiens]
	EAW96627.1 Mass: 60003 Score: 133 Matches: 4(4) Sequences: 4(4)
	keratin 6B, isoform CRA_b [Homo sapiens]
	KAI4066093.1 Mass: 60102 Score: 133 Matches: 4(4) Sequences: 4(4)
	keratin 6B [Homo sapiens]
19.	BAA22563.1 Mass: 273611 Score: 131 Matches: 4(4) Sequences: 4(4) emPAI: 0.05
	PRP8 protein [Homo sapiens]
	Query	Observed	Mr(expt)	Mr(calc)	ppm	Miss	Score	Expect	Rank	Unique	Peptide
	6377	561.7718	1121.5290	1121.5288	0.22	0	36	0.045	1	U	R.EHCPAGQPVK.V
	6704	631.8209	1261.6272	1261.6262	0.74	0	49	0.0038	1	U	K.EQSQLTATQTR.T
	7154	772.9073	1543.8000	1543.7954	2.99	0	54	0.0016	1	U	K.NNVNVASLTQSEIR.D
	7463	744.3505	2230.0296	2230.0290	0.23	0	40	0.031	1	U	R.YLTEHPDPNNENIVGYNNK.K
	Proteins matching the same set of peptides:
	AAH64370.1 Mass: 273408 Score: 131 Matches: 4(4) Sequences: 4(4)
	PRP8 pre-mRNA processing factor 8 homolog (S. cerevisiae) [Homo sapiens]
	EAW90588.1 Mass: 251566 Score: 131 Matches: 4(4) Sequences: 4(4)
	PRP8 pre-mRNA processing factor 8 homolog (yeast), isoform CRA_a [Homo sapiens]
	EAW90589.1 Mass: 273382 Score: 131 Matches: 4(4) Sequences: 4(4)
	PRP8 pre-mRNA processing factor 8 homolog (yeast), isoform CRA_b [Homo sapiens]
	NP_001099108.1 Mass: 273427 Score: 131 Matches: 4(4) Sequences: 4(4)
	pre-mRNA-processing-splicing factor 8 [Bos taurus]
20.	NP_002265.3 Mass: 45839 Score: 126 Matches: 3(3) Sequences: 3(3) emPAI: 0.22
	keratin, type I cytoskeletal 13 isoform b [Homo sapiens]
	Query	Observed	Mr(expt)	Mr(calc)	ppm	Miss	Score	Expect	Rank	Unique	Peptide
	5216	404.2027	806.3908	806.3923	-1.75	0	46	0.0031	1		R.LAADDFR.L
	6378	561.7935	1121.5724	1121.5717	0.64	0	58	0.00056	1		R.LEQEIATYR.S
	6569	601.3130	1200.6115	1200.6098	1.42	0	65	7.9e-005	1		R.QSVEADINGLR.R
	Proteins matching the same set of peptides:
	NP_705694.3 Mass: 49557 Score: 126 Matches: 3(3) Sequences: 3(3)
	keratin, type I cytoskeletal 13 isoform a [Homo sapiens]
	KAI2582922.1 Mass: 45809 Score: 126 Matches: 3(3) Sequences: 3(3)
	keratin 13 [Homo sapiens]
	KAI2582923.1 Mass: 45202 Score: 126 Matches: 3(3) Sequences: 3(3)
	keratin 13 [Homo sapiens]
	XP_003315487.1 Mass: 49527 Score: 126 Matches: 3(3) Sequences: 3(3)
	keratin, type I cytoskeletal 13 [Pan troglodytes]
21.	NP_000468.1 Mass: 69321 Score: 123 Matches: 3(3) Sequences: 3(3) emPAI: 0.14
	albumin preproprotein [Homo sapiens]
	Query	Observed	Mr(expt)	Mr(calc)	ppm	Miss	Score	Expect	Rank	Unique	Peptide
	5134	395.2386	788.4626	788.4644	-2.21	0	38	0.011	1	U	K.LVTDLTK.V
	6413	569.7525	1137.4904	1137.4907	-0.20	0	55	0.00023	1	U	K.CCTESLVNR.R
	7103	756.4254	1510.8363	1510.8355	0.50	0	76	5.3e-006	1	U	K.VPQVSTPTLVEVSR.N
	Proteins matching the same set of peptides:
	AAF01333.1 Mass: 69180 Score: 123 Matches: 3(3) Sequences: 3(3)
	serum albumin precursor [Homo sapiens]
	EAX05666.1 Mass: 68568 Score: 123 Matches: 3(3) Sequences: 3(3)
	albumin, isoform CRA_h [Homo sapiens]
	EAX05669.1 Mass: 47257 Score: 123 Matches: 3(3) Sequences: 3(3)
	albumin, isoform CRA_k [Homo sapiens]
	AAN17825.1 Mass: 69349 Score: 123 Matches: 3(3) Sequences: 3(3)
	serum albumin [Homo sapiens]
	CAH18185.1 Mass: 69357 Score: 123 Matches: 3(3) Sequences: 3(3)
	hypothetical protein [Homo sapiens]
	CAA23754.1 Mass: 69321 Score: 123 Matches: 3(3) Sequences: 3(3)
	serum albumin [Homo sapiens]
	AAG35503.1 Mass: 56745 Score: 123 Matches: 3(3) Sequences: 3(3)
	PRO2619 [Homo sapiens]
	BAG37325.1 Mass: 69348 Score: 123 Matches: 3(3) Sequences: 3(3)
	unnamed protein product [Homo sapiens]
	AAH41789.1 Mass: 47330 Score: 123 Matches: 3(3) Sequences: 3(3)
	ALB protein [Homo sapiens]
	BAG60658.1 Mass: 70317 Score: 123 Matches: 3(3) Sequences: 3(3)
	unnamed protein product [Homo sapiens]
	BAG60674.1 Mass: 59535 Score: 123 Matches: 3(3) Sequences: 3(3)
	unnamed protein product [Homo sapiens]
	AEE60908.1 Mass: 66488 Score: 123 Matches: 3(3) Sequences: 3(3)
	albumin, partial [Homo sapiens]
	BAF85444.1 Mass: 69222 Score: 123 Matches: 3(3) Sequences: 3(3)
	unnamed protein product [Homo sapiens]
	AAA98798.1 Mass: 69181 Score: 123 Matches: 3(3) Sequences: 3(3)
	alloalbumin Venezia [Homo sapiens]
	KAI2534612.1 Mass: 56175 Score: 123 Matches: 3(3) Sequences: 3(3)
	albumin [Homo sapiens]
	KAI2534615.1 Mass: 52025 Score: 123 Matches: 3(3) Sequences: 3(3)
	albumin [Homo sapiens]
22.	AAB05994.1 Mass: 80419 Score: 113 Matches: 4(4) Sequences: 4(4) emPAI: 0.16
	putative transmembrane protein precursor [Homo sapiens]
	Query	Observed	Mr(expt)	Mr(calc)	ppm	Miss	Score	Expect	Rank	Unique	Peptide
	5782	463.2424	924.4702	924.4705	-0.29	0	38	0.023	1	U	R.IIFDDFR.E
	6006	500.7484	999.4822	999.4814	0.82	0	42	0.0088	1	U	R.EAYYWLR.H
	6331	552.2745	1102.5345	1102.5335	0.94	0	43	0.015	1	U	R.FLAEEGFYK.F
	7078	746.3237	1490.6328	1490.6314	0.95	0	56	0.00024	1	U	K.ENDYYTPTGEFR.V
	Proteins matching the same set of peptides:
	EAW67643.1 Mass: 80376 Score: 113 Matches: 4(4) Sequences: 4(4)
	hCG2032701, isoform CRA_a [Homo sapiens]
	NP_001127302.1 Mass: 80477 Score: 113 Matches: 4(4) Sequences: 4(4)
	dolichyl-diphosphooligosaccharide--protein glycosyltransferase subunit STT3A [Pongo abelii]
23.	NP_001448.2 Mass: 277990 Score: 104 Matches: 2(2) Sequences: 2(2) emPAI: 0.02
	filamin-B isoform 2 [Homo sapiens]
	Query	Observed	Mr(expt)	Mr(calc)	ppm	Miss	Score	Expect	Rank	Unique	Peptide
	4953	378.7038	755.3930	755.3926	0.52	0	52	0.00028	1		R.AGGPGLER.G
	6575	602.2930	1202.5715	1202.5714	0.11	0	78	3.4e-006	1	U	K.VAVTEGCQPSR.V
	Proteins matching the same set of peptides:
	CAH18654.1 Mass: 256177 Score: 104 Matches: 2(2) Sequences: 2(2)
	hypothetical protein [Homo sapiens]
	AAC33845.1 Mass: 278018 Score: 104 Matches: 2(2) Sequences: 2(2)
	actin-binding protein homolog ABP-278 [Homo sapiens]
	AAC39842.1 Mass: 278021 Score: 104 Matches: 2(2) Sequences: 2(2)
	beta-filamin [Homo sapiens]
	CAE46040.1 Mass: 257230 Score: 104 Matches: 2(2) Sequences: 2(2)
	hypothetical protein [Homo sapiens]
	EAW65352.1 Mass: 280314 Score: 104 Matches: 2(2) Sequences: 2(2)
	filamin B, beta (actin binding protein 278), isoform CRA_a [Homo sapiens]
	EAW65354.1 Mass: 263856 Score: 104 Matches: 2(2) Sequences: 2(2)
	filamin B, beta (actin binding protein 278), isoform CRA_c [Homo sapiens]
	EAW65355.1 Mass: 270914 Score: 104 Matches: 2(2) Sequences: 2(2)
	filamin B, beta (actin binding protein 278), isoform CRA_d [Homo sapiens]
	EAW65357.1 Mass: 277820 Score: 104 Matches: 2(2) Sequences: 2(2)
	filamin B, beta (actin binding protein 278), isoform CRA_e [Homo sapiens]
	BAD93126.1 Mass: 170056 Score: 104 Matches: 2(2) Sequences: 2(2)
	filamin B, beta (actin binding protein 278) variant, partial [Homo sapiens]
	NP_001157789.1 Mass: 281459 Score: 104 Matches: 2(2) Sequences: 2(2)
	filamin-B isoform 1 [Homo sapiens]
	NP_001157790.1 Mass: 276765 Score: 104 Matches: 2(2) Sequences: 2(2)
	filamin-B isoform 3 [Homo sapiens]
	NP_001157791.1 Mass: 275496 Score: 104 Matches: 2(2) Sequences: 2(2)
	filamin-B isoform 4 [Homo sapiens]
	KAI2530173.1 Mass: 281490 Score: 104 Matches: 2(2) Sequences: 2(2)
	filamin B [Homo sapiens]
	KAI2530175.1 Mass: 276796 Score: 104 Matches: 2(2) Sequences: 2(2)
	filamin B [Homo sapiens]
	KAI2530176.1 Mass: 275527 Score: 104 Matches: 2(2) Sequences: 2(2)
	filamin B [Homo sapiens]
	KAI2530177.1 Mass: 256152 Score: 104 Matches: 2(2) Sequences: 2(2)
	filamin B [Homo sapiens]
	KAI4030241.1 Mass: 275499 Score: 104 Matches: 2(2) Sequences: 2(2)
	filamin B [Homo sapiens]
	KAI4030242.1 Mass: 276768 Score: 104 Matches: 2(2) Sequences: 2(2)
	filamin B [Homo sapiens]
	KAI4030243.1 Mass: 281462 Score: 104 Matches: 2(2) Sequences: 2(2)
	filamin B [Homo sapiens]
	KAI4030244.1 Mass: 277993 Score: 104 Matches: 2(2) Sequences: 2(2)
	filamin B [Homo sapiens]
	KAI4030245.1 Mass: 256124 Score: 104 Matches: 2(2) Sequences: 2(2)
	filamin B [Homo sapiens]
24.	NP_004475.1 Mass: 65520 Score: 99 Matches: 2(2) Sequences: 2(2) emPAI: 0.10
	glypican-3 isoform 2 precursor [Homo sapiens]
	Query	Observed	Mr(expt)	Mr(calc)	ppm	Miss	Score	Expect	Rank	Unique	Peptide
	4871	367.2263	732.4380	732.4382	-0.17	0	45	0.00035	1	U	K.LTTTIGK.L
	7081	498.5828	1492.7266	1492.7270	-0.25	0	70	3.7e-005	1	U	K.VAHVEHEETLSSR.R
	Proteins matching the same set of peptides:
	AAH35972.1 Mass: 65580 Score: 99 Matches: 2(2) Sequences: 2(2)
	Glypican 3 [Homo sapiens]
	ABC72125.1 Mass: 59469 Score: 99 Matches: 2(2) Sequences: 2(2)
	glypican-3 splice variant B [Homo sapiens]
	ABC72126.1 Mass: 65552 Score: 99 Matches: 2(2) Sequences: 2(2)
	glypican-3 splice variant A [Homo sapiens]
	NP_001158090.1 Mass: 63686 Score: 99 Matches: 2(2) Sequences: 2(2)
	glypican-3 isoform 3 precursor [Homo sapiens]
	NP_001158091.1 Mass: 59437 Score: 99 Matches: 2(2) Sequences: 2(2)
	glypican-3 isoform 4 precursor [Homo sapiens]
	XP_016884902.1 Mass: 55067 Score: 99 Matches: 2(2) Sequences: 2(2)
	glypican-3 isoform X1 [Homo sapiens]
25.	NP_001672.1 Mass: 109620 Score: 84 Matches: 2(2) Sequences: 2(2) emPAI: 0.06
	sarcoplasmic/endoplasmic reticulum calcium ATPase 2 isoform a [Homo sapiens]
	Query	Observed	Mr(expt)	Mr(calc)	ppm	Miss	Score	Expect	Rank	Unique	Peptide
	5931	488.7477	975.4807	975.4807	0.01	0	54	0.001	1	U	R.ANACNSVIK.Q
	6780	653.3065	1304.5984	1304.5997	-1.00	0	47	0.0035	1	U	R.EFDELNPSAQR.D
	Proteins matching the same set of peptides:
	BAG57266.1 Mass: 97720 Score: 84 Matches: 2(2) Sequences: 2(2)
	unnamed protein product [Homo sapiens]
	EAW97902.1 Mass: 100627 Score: 84 Matches: 2(2) Sequences: 2(2)
	ATPase, Ca++ transporting, cardiac muscle, slow twitch 2, isoform CRA_a [Homo sapiens]
	EAW97904.1 Mass: 95565 Score: 84 Matches: 2(2) Sequences: 2(2)
	ATPase, Ca++ transporting, cardiac muscle, slow twitch 2, isoform CRA_c [Homo sapiens]
	NP_733765.1 Mass: 114683 Score: 84 Matches: 2(2) Sequences: 2(2)
	sarcoplasmic/endoplasmic reticulum calcium ATPase 2 isoform b [Homo sapiens]
	XP_005253945.1 Mass: 109822 Score: 84 Matches: 2(2) Sequences: 2(2)
	sarcoplasmic/endoplasmic reticulum calcium ATPase 2 isoform X1 [Homo sapiens]
26.	NP_002282.2 Mass: 197909 Score: 80 Matches: 2(2) Sequences: 2(2) emPAI: 0.03
	laminin subunit beta-1 precursor [Homo sapiens]
	Query	Observed	Mr(expt)	Mr(calc)	ppm	Miss	Score	Expect	Rank	Unique	Peptide
	5813	467.7272	933.4399	933.4403	-0.46	0	71	2.7e-005	1	U	R.ETVDSVER.K
	6061	508.7856	1015.5567	1015.5549	1.69	0	39	0.04	1	U	K.QSAEDILLK.T
	Proteins matching the same set of peptides:
	AAH26018.2 Mass: 118836 Score: 80 Matches: 2(2) Sequences: 2(2)
	LAMB1 protein, partial [Homo sapiens]
	AAA59482.1 Mass: 197937 Score: 80 Matches: 2(2) Sequences: 2(2)
	laminin B1 [Homo sapiens]
	EAW83423.1 Mass: 200347 Score: 80 Matches: 2(2) Sequences: 2(2)
	laminin, beta 1, isoform CRA_a [Homo sapiens]
	KAI2547425.1 Mass: 197927 Score: 80 Matches: 2(2) Sequences: 2(2)
	laminin subunit beta 1 [Homo sapiens]
	KAI2547426.1 Mass: 200365 Score: 80 Matches: 2(2) Sequences: 2(2)
	laminin subunit beta 1 [Homo sapiens]
27.	NP_006507.2 Mass: 54049 Score: 74 Matches: 2(2) Sequences: 2(2) emPAI: 0.12
	solute carrier family 2, facilitated glucose transporter member 1 [Homo sapiens]
	Query	Observed	Mr(expt)	Mr(calc)	ppm	Miss	Score	Expect	Rank	Unique	Peptide
	5977	495.8030	989.5913	989.5910	0.39	0	41	0.0092	1	U	K.VTILELFR.S
	6419	571.7777	1141.5409	1141.5404	0.42	0	53	0.00077	1	U	R.TFDEIASGFR.Q
	Proteins matching the same set of peptides:
	AAI21805.1 Mass: 54019 Score: 74 Matches: 2(2) Sequences: 2(2)
	Solute carrier family 2 (facilitated glucose transporter), member 1 [Homo sapiens]
	AAC28635.1 Mass: 37855 Score: 74 Matches: 2(2) Sequences: 2(2)
	glucose transporter glycoprotein, partial [Homo sapiens]
	AAA52571.1 Mass: 54083 Score: 74 Matches: 2(2) Sequences: 2(2)
	glucose transporter glycoprotein [Homo sapiens]
	BAG53842.1 Mass: 45839 Score: 74 Matches: 2(2) Sequences: 2(2)
	unnamed protein product [Homo sapiens]
	BAG59323.1 Mass: 47789 Score: 74 Matches: 2(2) Sequences: 2(2)
	unnamed protein product [Homo sapiens]
	BAF85480.1 Mass: 53799 Score: 74 Matches: 2(2) Sequences: 2(2)
	unnamed protein product [Homo sapiens]
	BAD92224.1 Mass: 56981 Score: 74 Matches: 2(2) Sequences: 2(2)
	solute carrier family 2 (facilitated glucose transporter), member 1 variant, partial [Homo sapiens]
28.	NP_001667.4 Mass: 115437 Score: 73 Matches: 2(2) Sequences: 2(2) emPAI: 0.05
	potassium-transporting ATPase alpha chain 2 isoform 2 [Homo sapiens]
	Query	Observed	Mr(expt)	Mr(calc)	ppm	Miss	Score	Expect	Rank	Unique	Peptide
	4895	372.2240	742.4334	742.4337	-0.34	0	51	0.00054	1	U	R.AAELLAR.D
	6292	544.3007	1086.5868	1086.5856	1.12	0	48	0.0048	1		K.LIIVEGCQR.Q
	Proteins matching the same set of peptides:
	AAC37589.2 Mass: 115825 Score: 73 Matches: 2(2) Sequences: 2(2)
	non-gastric H+,K+-ATPase [Homo sapiens]
	NP_001172014.1 Mass: 115979 Score: 73 Matches: 2(2) Sequences: 2(2)
	potassium-transporting ATPase alpha chain 2 isoform 1 [Homo sapiens]
29.	BAG35744.1 Mass: 100241 Score: 72 Matches: 2(2) Sequences: 2(2) emPAI: 0.06
	unnamed protein product [Homo sapiens]
	Query	Observed	Mr(expt)	Mr(calc)	ppm	Miss	Score	Expect	Rank	Unique	Peptide
	5784	463.7511	925.4876	925.4869	0.83	0	37	0.022	1	U	K.SPEDLPLR.L
	7026	488.2394	1461.6964	1461.6960	0.25	0	50	0.0023	1	U	R.DAAAPAEPQAQHTR.S
	Proteins matching the same set of peptides:
	AAC64943.1 Mass: 100222 Score: 72 Matches: 2(2) Sequences: 2(2)
	transmembrane protein [Homo sapiens]
	NP_001139325.1 Mass: 100227 Score: 72 Matches: 2(2) Sequences: 2(2)
	wolframin [Homo sapiens]
	KAI2533625.1 Mass: 89589 Score: 72 Matches: 2(2) Sequences: 2(2)
	wolframin ER transmembrane glycoprotein, partial [Homo sapiens]
	KAI2533626.1 Mass: 88342 Score: 72 Matches: 2(2) Sequences: 2(2)
	wolframin ER transmembrane glycoprotein, partial [Homo sapiens]
	KAI4024775.1 Mass: 101470 Score: 72 Matches: 2(2) Sequences: 2(2)
	wolframin ER transmembrane glycoprotein [Homo sapiens]
30.	NP_001447.2 Mass: 279843 Score: 68 Matches: 2(2) Sequences: 2(2) emPAI: 0.02
	filamin-A isoform 1 [Homo sapiens]
	Query	Observed	Mr(expt)	Mr(calc)	ppm	Miss	Score	Expect	Rank	Unique	Peptide
	4953	378.7038	755.3930	755.3926	0.52	0	52	0.00028	1		R.AGGPGLER.A
	6992	715.3630	1428.7115	1428.7110	0.38	0	38	0.045	1	U	K.AFGPGLQGGSAGSPAR.F
	Proteins matching the same set of peptides:
	BAC03408.3 Mass: 279872 Score: 68 Matches: 2(2) Sequences: 2(2)
	FLJ00343 protein [Homo sapiens]
	CAA37495.1 Mass: 280586 Score: 68 Matches: 2(2) Sequences: 2(2)
	unnamed protein product [Homo sapiens]
	BAD52435.1 Mass: 277332 Score: 68 Matches: 2(2) Sequences: 2(2)
	filamin A [Homo sapiens]
	EAW72744.1 Mass: 248350 Score: 68 Matches: 2(2) Sequences: 2(2)
	filamin A, alpha (actin binding protein 280), isoform CRA_a [Homo sapiens]
	EAW72748.1 Mass: 263754 Score: 68 Matches: 2(2) Sequences: 2(2)
	filamin A, alpha (actin binding protein 280), isoform CRA_e [Homo sapiens]
	NP_001104026.1 Mass: 280564 Score: 68 Matches: 2(2) Sequences: 2(2)
	filamin-A isoform 2 [Homo sapiens]
	KAI2601347.1 Mass: 278053 Score: 68 Matches: 2(2) Sequences: 2(2)
	filamin A [Homo sapiens]
31.	BAC11519.1 Mass: 41490 Score: 68 Matches: 2(2) Sequences: 2(2) emPAI: 0.16
	unnamed protein product [Homo sapiens]
	Query	Observed	Mr(expt)	Mr(calc)	ppm	Miss	Score	Expect	Rank	Unique	Peptide
	5150	396.2187	790.4228	790.4225	0.36	0	38	0.024	1	U	K.SFEAPIK.L
	5757	459.2325	916.4505	916.4502	0.33	0	50	0.0021	1	U	K.DPAAVTESK.E
	Proteins matching the same set of peptides:
	NP_110416.1 Mass: 41462 Score: 68 Matches: 2(2) Sequences: 2(2)
	minor histocompatibility antigen H13 isoform 1 [Homo sapiens]
	NP_848696.1 Mass: 46795 Score: 68 Matches: 2(2) Sequences: 2(2)
	minor histocompatibility antigen H13 isoform 3 [Homo sapiens]
	KAI2594334.1 Mass: 46284 Score: 68 Matches: 2(2) Sequences: 2(2)
	histocompatibility minor 13 [Homo sapiens]
32.	AAH00062.1 Mass: 56576 Score: 66 Matches: 1(1) Sequences: 1(1) emPAI: 0.06
	Solute carrier family 1 (neutral amino acid transporter), member 5 [Homo sapiens]
	Query	Observed	Mr(expt)	Mr(calc)	ppm	Miss	Score	Expect	Rank	Unique	Peptide
	6325	551.7730	1101.5313	1101.5302	1.03	0	66	5.3e-005	1	U	R.GPAGDATVASEK.E
	Proteins matching the same set of peptides:
	NP_005619.1 Mass: 56562 Score: 66 Matches: 1(1) Sequences: 1(1)
	neutral amino acid transporter B(0) isoform 1 [Homo sapiens]
	AAD09812.1 Mass: 56404 Score: 66 Matches: 1(1) Sequences: 1(1)
	RD114/simian type D retrovirus receptor [Homo sapiens]
	AAD09814.1 Mass: 56547 Score: 66 Matches: 1(1) Sequences: 1(1)
	neutral amino acid transporter [Homo sapiens]
	BAH14917.1 Mass: 36584 Score: 66 Matches: 1(1) Sequences: 1(1)
	unnamed protein product [Homo sapiens]
	AAC50629.1 Mass: 56585 Score: 66 Matches: 1(1) Sequences: 1(1)
	neutral amino acid transporter B [Homo sapiens]
	BAG56938.1 Mass: 33702 Score: 66 Matches: 1(1) Sequences: 1(1)
	unnamed protein product [Homo sapiens]
	BAG61189.1 Mass: 36626 Score: 66 Matches: 1(1) Sequences: 1(1)
	unnamed protein product [Homo sapiens]
	AAK77026.1 Mass: 55239 Score: 66 Matches: 1(1) Sequences: 1(1)
	sodium-dependent neutral amino acid transporter type 2 truncated isoform, partial [Homo sapiens]
	BAD92975.1 Mass: 57354 Score: 66 Matches: 1(1) Sequences: 1(1)
	solute carrier family 1 (neutral amino acid transporter), member 5 variant, partial [Homo sapiens]
	NP_001138616.1 Mass: 33688 Score: 66 Matches: 1(1) Sequences: 1(1)
	neutral amino acid transporter B(0) isoform 2 [Homo sapiens]
	NP_001138617.1 Mass: 36612 Score: 66 Matches: 1(1) Sequences: 1(1)
	neutral amino acid transporter B(0) isoform 3 [Homo sapiens]
	KAI2591913.1 Mass: 39418 Score: 66 Matches: 1(1) Sequences: 1(1)
	solute carrier family 1 member 5 [Homo sapiens]
33.	NP_005879.1 Mass: 40069 Score: 65 Matches: 1(1) Sequences: 1(1) emPAI: 0.08
	phosphate carrier protein, mitochondrial isoform a precursor [Homo sapiens]
	Query	Observed	Mr(expt)	Mr(calc)	ppm	Miss	Score	Expect	Rank	Unique	Peptide
	6879	681.3624	1360.7103	1360.7099	0.30	0	65	0.00014	1	U	R.IQTQPGYANTLR.D
	Proteins matching the same set of peptides:
	BAC11187.1 Mass: 39907 Score: 65 Matches: 1(1) Sequences: 1(1)
	unnamed protein product [Homo sapiens]
	AAH15379.2 Mass: 39802 Score: 65 Matches: 1(1) Sequences: 1(1)
	SLC25A3 protein, partial [Homo sapiens]
	BAG38185.1 Mass: 39923 Score: 65 Matches: 1(1) Sequences: 1(1)
	unnamed protein product [Homo sapiens]
	BAD96378.1 Mass: 39903 Score: 65 Matches: 1(1) Sequences: 1(1)
	solute carrier family 25 member 3 isoform b precursor variant, partial [Homo sapiens]
	EAW97600.1 Mass: 26014 Score: 65 Matches: 1(1) Sequences: 1(1)
	solute carrier family 25 (mitochondrial carrier; phosphate carrier), member 3, isoform CRA_c [Homo sapiens]
	NP_001233352.1 Mass: 39933 Score: 65 Matches: 1(1) Sequences: 1(1)
	phosphate carrier protein, mitochondrial [Pan troglodytes]
	KAI2567471.1 Mass: 36138 Score: 65 Matches: 1(1) Sequences: 1(1)
	solute carrier family 25 member 3 [Homo sapiens]
34.	NP_002942.2 Mass: 69241 Score: 63 Matches: 1(1) Sequences: 1(1) emPAI: 0.04
	dolichyl-diphosphooligosaccharide--protein glycosyltransferase subunit 2 isoform 1 precursor [Homo sapiens]
	Query	Observed	Mr(expt)	Mr(calc)	ppm	Miss	Score	Expect	Rank	Unique	Peptide
	7853	1085.2355	3252.6846	3252.6666	5.52	0	63	0.00018	1	U	K.ASLDRPFTNLESAFYSIVGLSSLGAQVPDAK.K
	Proteins matching the same set of peptides:
	CAG33180.1 Mass: 69285 Score: 63 Matches: 1(1) Sequences: 1(1)
	RPN2 [Homo sapiens]
	CAA68393.1 Mass: 69259 Score: 63 Matches: 1(1) Sequences: 1(1)
	unnamed protein product [Homo sapiens]
	EAW76076.1 Mass: 37143 Score: 63 Matches: 1(1) Sequences: 1(1)
	ribophorin II, isoform CRA_d [Homo sapiens]
	NP_001129243.1 Mass: 67681 Score: 63 Matches: 1(1) Sequences: 1(1)
	dolichyl-diphosphooligosaccharide--protein glycosyltransferase subunit 2 isoform 2 precursor [Homo sapiens]
	NP_001311228.1 Mass: 67471 Score: 63 Matches: 1(1) Sequences: 1(1)
	dolichyl-diphosphooligosaccharide--protein glycosyltransferase subunit 2 isoform 3 precursor [Homo sapiens]
	NP_001311230.1 Mass: 73017 Score: 63 Matches: 1(1) Sequences: 1(1)
	dolichyl-diphosphooligosaccharide--protein glycosyltransferase subunit 2 isoform 4 precursor [Homo sapiens]
	NP_001311231.1 Mass: 65627 Score: 63 Matches: 1(1) Sequences: 1(1)
	dolichyl-diphosphooligosaccharide--protein glycosyltransferase subunit 2 isoform 5 precursor [Homo sapiens]
	NP_001311232.1 Mass: 70148 Score: 63 Matches: 1(1) Sequences: 1(1)
	dolichyl-diphosphooligosaccharide--protein glycosyltransferase subunit 2 isoform 6 precursor [Homo sapiens]
	NP_001311233.1 Mass: 71085 Score: 63 Matches: 1(1) Sequences: 1(1)
	dolichyl-diphosphooligosaccharide--protein glycosyltransferase subunit 2 isoform 7 precursor [Homo sapiens]
	NP_001311234.1 Mass: 71173 Score: 63 Matches: 1(1) Sequences: 1(1)
	dolichyl-diphosphooligosaccharide--protein glycosyltransferase subunit 2 isoform 8 precursor [Homo sapiens]
	XP_006723914.1 Mass: 69403 Score: 63 Matches: 1(1) Sequences: 1(1)
	dolichyl-diphosphooligosaccharide--protein glycosyltransferase subunit 2 isoform X1 [Homo sapiens]
	XP_006723915.1 Mass: 67559 Score: 63 Matches: 1(1) Sequences: 1(1)
	dolichyl-diphosphooligosaccharide--protein glycosyltransferase subunit 2 isoform X2 [Homo sapiens]
35.	AAP94122.1 Mass: 265446 Score: 58 Matches: 2(2) Sequences: 2(2) emPAI: 0.02
	acetyl-CoA carboxylase 1 [Homo sapiens]
	Query	Observed	Mr(expt)	Mr(calc)	ppm	Miss	Score	Expect	Rank	Unique	Peptide
	5830	469.7141	937.4137	937.4141	-0.47	1	39	0.016	1	U	R.DKFEEDR.I
	6500	587.3091	1172.6036	1172.6037	-0.08	0	39	0.034	1	U	R.LGTPELSTAER.K
	Proteins matching the same set of peptides:
	NP_942131.1 Mass: 269827 Score: 58 Matches: 2(2) Sequences: 2(2)
	acetyl-CoA carboxylase 1 isoform 1 [Homo sapiens]
	NP_942133.1 Mass: 265385 Score: 58 Matches: 2(2) Sequences: 2(2)
	acetyl-CoA carboxylase 1 isoform 2 [Homo sapiens]
	NP_942134.1 Mass: 259521 Score: 58 Matches: 2(2) Sequences: 2(2)
	acetyl-CoA carboxylase 1 isoform 3 [Homo sapiens]
	NP_942135.1 Mass: 257075 Score: 58 Matches: 2(2) Sequences: 2(2)
	acetyl-CoA carboxylase 1 isoform 4 [Homo sapiens]
	KAI2582534.1 Mass: 114546 Score: 58 Matches: 2(2) Sequences: 2(2)
	acetyl-CoA carboxylase alpha, partial [Homo sapiens]
	XP_006721916.1 Mass: 268962 Score: 58 Matches: 2(2) Sequences: 2(2)
	acetyl-CoA carboxylase 1 isoform X1 [Homo sapiens]
	XP_011523003.1 Mass: 266503 Score: 58 Matches: 2(2) Sequences: 2(2)
	acetyl-CoA carboxylase 1 isoform X2 [Homo sapiens]
	XP_047291840.1 Mass: 264519 Score: 58 Matches: 2(2) Sequences: 2(2)
	acetyl-CoA carboxylase 1 isoform X4 [Homo sapiens]
	XP_047291844.1 Mass: 259279 Score: 58 Matches: 2(2) Sequences: 2(2)
	acetyl-CoA carboxylase 1 isoform X6 [Homo sapiens]
	XP_047291847.1 Mass: 256209 Score: 58 Matches: 2(2) Sequences: 2(2)
	acetyl-CoA carboxylase 1 isoform X8 [Homo sapiens]
36.	BAC03596.1 Mass: 85996 Score: 57 Matches: 1(1) Sequences: 1(1) emPAI: 0.04
	unnamed protein product [Homo sapiens]
	Query	Observed	Mr(expt)	Mr(calc)	ppm	Miss	Score	Expect	Rank	Unique	Peptide
	5679	451.2346	900.4546	900.4553	-0.70	0	57	0.00045	1	U	K.ADVDISGPK.V
	Proteins matching the same set of peptides:
	BAG62112.1 Mass: 114065 Score: 57 Matches: 1(1) Sequences: 1(1)
	unnamed protein product, partial [Homo sapiens]
	AAA69899.1 Mass: 179894 Score: 57 Matches: 1(1) Sequences: 1(1)
	AHNAK nucleoprotein, partial [Homo sapiens]
	EAW74020.1 Mass: 313533 Score: 57 Matches: 1(1) Sequences: 1(1)
	hCG2020155, isoform CRA_a [Homo sapiens]
	NP_001333374.1 Mass: 628699 Score: 57 Matches: 1(1) Sequences: 1(1)
	neuroblast differentiation-associated protein AHNAK isoform 1 [Homo sapiens]
	KAI2560424.1 Mass: 628699 Score: 57 Matches: 1(1) Sequences: 1(1)
	AHNAK nucleoprotein [Homo sapiens]
	XP_016873759.1 Mass: 621439 Score: 57 Matches: 1(1) Sequences: 1(1)
	neuroblast differentiation-associated protein AHNAK isoform X2 [Homo sapiens]
37.	BAC11277.1 Mass: 43098 Score: 55 Matches: 1(1) Sequences: 1(1) emPAI: 0.07
	unnamed protein product [Homo sapiens]
	Query	Observed	Mr(expt)	Mr(calc)	ppm	Miss	Score	Expect	Rank	Unique	Peptide
	7155	773.3935	1544.7724	1544.7682	2.74	0	55	0.0011	1	U	R.LESEGSPETLTNLR.K
	Proteins matching the same set of peptides:
	AAF29085.1 Mass: 44394 Score: 55 Matches: 1(1) Sequences: 1(1)
	HSPC121 [Homo sapiens]
	AAH35508.1 Mass: 42880 Score: 55 Matches: 1(1) Sequences: 1(1)
	PTPLAD1 protein, partial [Homo sapiens]
	BAB55101.1 Mass: 43131 Score: 55 Matches: 1(1) Sequences: 1(1)
	unnamed protein product [Homo sapiens]
	NP_057479.2 Mass: 43132 Score: 55 Matches: 1(1) Sequences: 1(1)
	very-long-chain (3R)-3-hydroxyacyl-CoA dehydratase 3 [Homo sapiens]
	CAB69070.1 Mass: 43515 Score: 55 Matches: 1(1) Sequences: 1(1)
	B-ind1 protein [Homo sapiens]
	EAW77735.1 Mass: 22498 Score: 55 Matches: 1(1) Sequences: 1(1)
	protein tyrosine phosphatase-like A domain containing 1, isoform CRA_a [Homo sapiens]
	EAW77736.1 Mass: 22582 Score: 55 Matches: 1(1) Sequences: 1(1)
	protein tyrosine phosphatase-like A domain containing 1, isoform CRA_b [Homo sapiens]
	KAI2574712.1 Mass: 47088 Score: 55 Matches: 1(1) Sequences: 1(1)
	3-hydroxyacyl-CoA dehydratase 3 [Homo sapiens]
	KAI2574714.1 Mass: 36407 Score: 55 Matches: 1(1) Sequences: 1(1)
	3-hydroxyacyl-CoA dehydratase 3 [Homo sapiens]
	KAI2574715.1 Mass: 40043 Score: 55 Matches: 1(1) Sequences: 1(1)
	3-hydroxyacyl-CoA dehydratase 3 [Homo sapiens]
	KAI2574720.1 Mass: 16153 Score: 55 Matches: 1(1) Sequences: 1(1)
	3-hydroxyacyl-CoA dehydratase 3, partial [Homo sapiens]
	XP_011519966.1 Mass: 29186 Score: 55 Matches: 1(1) Sequences: 1(1)
	very-long-chain (3R)-3-hydroxyacyl-CoA dehydratase 3 isoform X1 [Homo sapiens]
38.	CAA52817.1 Score: 54 Matches: 1(1) Sequences: 1(1)
	AHNAK-related protein, partial [Homo sapiens]
	Query	Observed	Mr(expt)	Mr(calc)	ppm	Miss	Score	Expect	Rank	Unique	Peptide
	5679	451.2346	900.4546	900.4553	-0.70	0	54	0.00076	2		K.ADLDVSGPK.V
39.	AAA69898.1 Score: 54 Matches: 1(1) Sequences: 1(1)
	AHNAK, partial [Homo sapiens]
	Query	Observed	Mr(expt)	Mr(calc)	ppm	Miss	Score	Expect	Rank	Unique	Peptide
	5679	451.2346	900.4546	900.4553	-0.70	0	54	0.00076	2		K.ADIDVSGPK.V
	Proteins matching the same set of peptides:
	BAC87652.1 Score: 54 Matches: 1(1) Sequences: 1(1)
	unnamed protein product, partial [Homo sapiens]
	EAW74021.1 Score: 54 Matches: 1(1) Sequences: 1(1)
	hCG2020155, isoform CRA_b [Homo sapiens]
	EAW74022.1 Score: 54 Matches: 1(1) Sequences: 1(1)
	hCG2020155, isoform CRA_c [Homo sapiens]
40.	BAH12782.1 Mass: 18712 Score: 52 Matches: 1(1) Sequences: 1(1) emPAI: 0.17
	unnamed protein product [Homo sapiens]
	Query	Observed	Mr(expt)	Mr(calc)	ppm	Miss	Score	Expect	Rank	Unique	Peptide
	5758	459.2561	916.4976	916.4978	-0.15	0	52	0.0019	1	U	K.LTQGETLR.K
	Proteins matching the same set of peptides:
	BAH13803.1 Mass: 54715 Score: 52 Matches: 1(1) Sequences: 1(1)
	unnamed protein product [Homo sapiens]
	BAH14155.1 Mass: 34512 Score: 52 Matches: 1(1) Sequences: 1(1)
	unnamed protein product [Homo sapiens]
	BAH14790.1 Mass: 54688 Score: 52 Matches: 1(1) Sequences: 1(1)
	unnamed protein product [Homo sapiens]
	NP_055577.1 Mass: 60062 Score: 52 Matches: 1(1) Sequences: 1(1)
	delta(24)-sterol reductase precursor [Homo sapiens]
	PNI71376.1 Mass: 49404 Score: 52 Matches: 1(1) Sequences: 1(1)
	DHCR24 isoform 2 [Pan troglodytes]
	KAI2517284.1 Mass: 61407 Score: 52 Matches: 1(1) Sequences: 1(1)
	24-dehydrocholesterol reductase [Homo sapiens]
41.	EAX00129.1 Mass: 127896 Score: 51 Matches: 1(1) Sequences: 1(1) emPAI: 0.02
	reticulon 4, isoform CRA_h [Homo sapiens]
	Query	Observed	Mr(expt)	Mr(calc)	ppm	Miss	Score	Expect	Rank	Unique	Peptide
	6723	636.3577	1270.7009	1270.7034	-1.92	0	51	0.0021	1	U	R.GPLPAAPPVAPER.Q
	Proteins matching the same set of peptides:
	EAX00131.1 Mass: 43228 Score: 51 Matches: 1(1) Sequences: 1(1)
	reticulon 4, isoform CRA_i [Homo sapiens]
	AAY24029.1 Mass: 19288 Score: 51 Matches: 1(1) Sequences: 1(1)
	unknown, partial [Homo sapiens]
	NP_065393.1 Mass: 129851 Score: 51 Matches: 1(1) Sequences: 1(1)
	reticulon-4 isoform A [Homo sapiens]
	AAH71848.1 Mass: 36895 Score: 51 Matches: 1(1) Sequences: 1(1)
	RTN4 protein [Homo sapiens]
	BAA83712.1 Mass: 40308 Score: 51 Matches: 1(1) Sequences: 1(1)
	ASY [Homo sapiens]
	CAB99248.1 Mass: 129861 Score: 51 Matches: 1(1) Sequences: 1(1)
	Nogo-A protein [Homo sapiens]
	NP_722550.1 Mass: 40293 Score: 51 Matches: 1(1) Sequences: 1(1)
	reticulon-4 isoform B [Homo sapiens]
	NP_997403.1 Mass: 42248 Score: 51 Matches: 1(1) Sequences: 1(1)
	reticulon-4 isoform D [Homo sapiens]
	KAI2523418.1 Mass: 37095 Score: 51 Matches: 1(1) Sequences: 1(1)
	reticulon 4 [Homo sapiens]
	KAI2523419.1 Mass: 40267 Score: 51 Matches: 1(1) Sequences: 1(1)
	reticulon 4 [Homo sapiens]
	KAI2523420.1 Mass: 42222 Score: 51 Matches: 1(1) Sequences: 1(1)
	reticulon 4 [Homo sapiens]
	KAI2523421.1 Mass: 129825 Score: 51 Matches: 1(1) Sequences: 1(1)
	reticulon 4 [Homo sapiens]
	KAI4034575.1 Mass: 37121 Score: 51 Matches: 1(1) Sequences: 1(1)
	reticulon 4 [Homo sapiens]
42.	NP_004406.2 Mass: 331569 Score: 44 Matches: 1(1) Sequences: 1(1) emPAI: 0.01
	desmoplakin isoform I [Homo sapiens]
	Query	Observed	Mr(expt)	Mr(calc)	ppm	Miss	Score	Expect	Rank	Unique	Peptide
	5344	416.7302	831.4459	831.4450	1.02	0	44	0.012	1	U	K.VTQLTDR.W
	Proteins matching the same set of peptides:
	BAG59338.1 Mass: 112198 Score: 44 Matches: 1(1) Sequences: 1(1)
	unnamed protein product, partial [Homo sapiens]
	BAG65062.1 Mass: 156205 Score: 44 Matches: 1(1) Sequences: 1(1)
	unnamed protein product [Homo sapiens]
	AAA85135.1 Mass: 331571 Score: 44 Matches: 1(1) Sequences: 1(1)
	desmoplakin I [Homo sapiens]
	NP_001008844.1 Mass: 259957 Score: 44 Matches: 1(1) Sequences: 1(1)
	desmoplakin isoform II [Homo sapiens]
	NP_001305963.1 Mass: 278742 Score: 44 Matches: 1(1) Sequences: 1(1)
	desmoplakin isoform Ia [Homo sapiens]
	KAI2540787.1 Mass: 331509 Score: 44 Matches: 1(1) Sequences: 1(1)
	desmoplakin [Homo sapiens]
43.	5VYC_f1 Mass: 17893 Score: 43 Matches: 1(1) Sequences: 1(1) emPAI: 0.18
	Chain f1, Ribosomal protein S27a [Homo sapiens]
	Query	Observed	Mr(expt)	Mr(calc)	ppm	Miss	Score	Expect	Rank	Unique	Peptide
	6239	534.3091	1066.6037	1066.6135	-9.14	0	43	0.0083	1	U	K.ESTLHLVLR.L
	Proteins matching the same set of peptides:
	EAX00107.1 Mass: 14291 Score: 43 Matches: 1(1) Sequences: 1(1)
	ribosomal protein S27a, isoform CRA_b, partial [Homo sapiens]
	EAX04504.1 Mass: 8258 Score: 43 Matches: 1(1) Sequences: 1(1)
	ubiquitin B, isoform CRA_c, partial [Homo sapiens]
	EAX04505.1 Mass: 13066 Score: 43 Matches: 1(1) Sequences: 1(1)
	ubiquitin B, isoform CRA_d [Homo sapiens]
	EAX04506.1 Mass: 16792 Score: 43 Matches: 1(1) Sequences: 1(1)
	ubiquitin B, isoform CRA_e [Homo sapiens]
	AAK31162.1 Mass: 16165 Score: 43 Matches: 1(1) Sequences: 1(1)
	ubiquitin A-52 residue ribosomal protein fusion product 1, partial [Homo sapiens]
	AAA36788.1 Mass: 17434 Score: 43 Matches: 1(1) Sequences: 1(1)
	pro-ubiquitin, partial [Homo sapiens]
	EAW49110.1 Mass: 16522 Score: 43 Matches: 1(1) Sequences: 1(1)
	hCG1993742 [Homo sapiens]
	CAA68439.1 Mass: 10412 Score: 43 Matches: 1(1) Sequences: 1(1)
	ubiquitin precursor, partial [Homo sapiens]
	BAB79488.1 Mass: 14068 Score: 43 Matches: 1(1) Sequences: 1(1)
	ribosomal protein S27A, partial [Homo sapiens]
	ASU96582.1 Mass: 16707 Score: 43 Matches: 1(1) Sequences: 1(1)
	40S ribosomal protein, partial [Homo sapiens]
	NP_001005123.1 Mass: 14719 Score: 43 Matches: 1(1) Sequences: 1(1)
	ubiquitin-60S ribosomal protein L40 [Xenopus tropicalis]
	NP_001016172.1 Mass: 17953 Score: 43 Matches: 1(1) Sequences: 1(1)
	ubiquitin-40S ribosomal protein S27a [Xenopus tropicalis]
	NP_001307950.1 Mass: 15506 Score: 43 Matches: 1(1) Sequences: 1(1)
	ubiquitin-60S ribosomal protein L40 isoform 2 [Homo sapiens]
	KAI2520742.1 Mass: 17974 Score: 43 Matches: 1(1) Sequences: 1(1)
	hypothetical protein KI723_012683 [Homo sapiens]
	KAI2523438.1 Mass: 12230 Score: 43 Matches: 1(1) Sequences: 1(1)
	ribosomal protein S27a, partial [Homo sapiens]
	KAI2568682.1 Mass: 15300 Score: 43 Matches: 1(1) Sequences: 1(1)
	ubiquitin C, partial [Homo sapiens]
	KAI2568683.1 Mass: 15023 Score: 43 Matches: 1(1) Sequences: 1(1)
	ubiquitin C, partial [Homo sapiens]
	KAI2568684.1 Mass: 13780 Score: 43 Matches: 1(1) Sequences: 1(1)
	ubiquitin C, partial [Homo sapiens]
	KAI2581592.1 Mass: 10463 Score: 43 Matches: 1(1) Sequences: 1(1)
	ubiquitin B, partial [Homo sapiens]
	KAI2589791.1 Mass: 15466 Score: 43 Matches: 1(1) Sequences: 1(1)
	ubiquitin A-52 residue ribosomal protein fusion product 1, partial [Homo sapiens]
	KAI2589792.1 Mass: 12795 Score: 43 Matches: 1(1) Sequences: 1(1)
	ubiquitin A-52 residue ribosomal protein fusion product 1, partial [Homo sapiens]
	XP_002827118.2 Mass: 8663 Score: 43 Matches: 1(1) Sequences: 1(1)
	ubiquitin [Pongo abelii]
	KAI4084265.1 Mass: 17955 Score: 43 Matches: 1(1) Sequences: 1(1)
	hypothetical protein G5576_002681 [Homo sapiens]
	XP_005260109.1 Mass: 17498 Score: 43 Matches: 1(1) Sequences: 1(1)
	ubiquitin-60S ribosomal protein L40 isoform X2 [Homo sapiens]
	XP_016882687.2 Mass: 18286 Score: 43 Matches: 1(1) Sequences: 1(1)
	ubiquitin-60S ribosomal protein L40 isoform X1 [Homo sapiens]
	AAV33127.1 Mass: 17142 Score: 43 Matches: 1(1) Sequences: 1(1)
	ubiquitin C splice variant [Homo sapiens]
	KAI2568678.1 Mass: 19004 Score: 43 Matches: 1(1) Sequences: 1(1)
	ubiquitin C, partial [Homo sapiens]
	KAI2568679.1 Mass: 18163 Score: 43 Matches: 1(1) Sequences: 1(1)
	ubiquitin C, partial [Homo sapiens]
	KAI2568680.1 Mass: 17473 Score: 43 Matches: 1(1) Sequences: 1(1)
	ubiquitin C, partial [Homo sapiens]
	KAI2581591.1 Mass: 23148 Score: 43 Matches: 1(1) Sequences: 1(1)
	ubiquitin B, partial [Homo sapiens]
	XP_005298245.1 Mass: 17204 Score: 43 Matches: 1(1) Sequences: 1(1)
	polyubiquitin-B [Chrysemys picta bellii]
	XP_009481652.1 Mass: 16831 Score: 43 Matches: 1(1) Sequences: 1(1)
	PREDICTED: polyubiquitin, partial [Pelecanus crispus]
	CAB55973.1 Mass: 26857 Score: 43 Matches: 1(1) Sequences: 1(1)
	hypothetical protein, partial [Homo sapiens]
	NP_001009117.1 Mass: 25746 Score: 43 Matches: 1(1) Sequences: 1(1)
	polyubiquitin-B [Pan troglodytes]
	XP_004395987.1 Mass: 25742 Score: 43 Matches: 1(1) Sequences: 1(1)
	PREDICTED: polyubiquitin-C [Odobenus rosmarus divergens]
	AAA36787.1 Mass: 30285 Score: 43 Matches: 1(1) Sequences: 1(1)
	ubiquitin precursor, partial [Homo sapiens]
	BAB71316.1 Mass: 43622 Score: 43 Matches: 1(1) Sequences: 1(1)
	unnamed protein product [Homo sapiens]
	XP_006109154.1 Mass: 34284 Score: 43 Matches: 1(1) Sequences: 1(1)
	polyubiquitin-B [Myotis lucifugus]
	AAH08955.2 Mass: 61486 Score: 43 Matches: 1(1) Sequences: 1(1)
	UBC protein, partial [Homo sapiens]
	BAM77034.1 Mass: 59864 Score: 43 Matches: 1(1) Sequences: 1(1)
	ubiquitin C [Homo sapiens]
	NP_001135561.1 Mass: 59908 Score: 43 Matches: 1(1) Sequences: 1(1)
	uncharacterized protein LOC100216108 [Xenopus tropicalis]
	BAA09860.1 Mass: 68681 Score: 43 Matches: 1(1) Sequences: 1(1)
	polyubiquitin, partial [Homo sapiens]
	BAA23486.1 Mass: 68448 Score: 43 Matches: 1(1) Sequences: 1(1)
	polyubiquitin [Homo sapiens]
	BAF84228.1 Mass: 68406 Score: 43 Matches: 1(1) Sequences: 1(1)
	unnamed protein product [Homo sapiens]
	NP_001006688.1 Mass: 68450 Score: 43 Matches: 1(1) Sequences: 1(1)
	polyubiquitin-C [Xenopus tropicalis]
	NP_066289.3 Mass: 76992 Score: 43 Matches: 1(1) Sequences: 1(1)
	polyubiquitin-C [Homo sapiens]
	BAM77033.1 Mass: 77008 Score: 43 Matches: 1(1) Sequences: 1(1)
	ubiquitin C [Homo sapiens]
	BAM77035.1 Mass: 76965 Score: 43 Matches: 1(1) Sequences: 1(1)
	ubiquitin C [Homo sapiens]
	BAM77037.1 Mass: 76954 Score: 43 Matches: 1(1) Sequences: 1(1)
	ubiquitin C [Homo sapiens]
	AAH80583.1 Mass: 78650 Score: 43 Matches: 1(1) Sequences: 1(1)
	Unknown (protein for IMAGE:2822684), partial [Homo sapiens]
	BAD93019.1 Mass: 147245 Score: 43 Matches: 1(1) Sequences: 1(1)
	ubiquitin C variant, partial [Homo sapiens]
44.	BAA07892.3 Mass: 225366 Score: 42 Matches: 1(1) Sequences: 1(1) emPAI: 0.01
	KIAA0097 protein [Homo sapiens]
	Query	Observed	Mr(expt)	Mr(calc)	ppm	Miss	Score	Expect	Rank	Unique	Peptide
	6412	569.2861	1136.5577	1136.5574	0.25	0	42	0.014	1	U	K.HINDSAPEVR.D
	Proteins matching the same set of peptides:
	AAI11044.1 Mass: 63776 Score: 42 Matches: 1(1) Sequences: 1(1)
	CKAP5 protein, partial [Homo sapiens]
	AAI20871.1 Mass: 213437 Score: 42 Matches: 1(1) Sequences: 1(1)
	CKAP5 protein [Homo sapiens]
	NP_055571.2 Mass: 218387 Score: 42 Matches: 1(1) Sequences: 1(1)
	cytoskeleton-associated protein 5 isoform b [Homo sapiens]
	CAA63212.1 Mass: 218285 Score: 42 Matches: 1(1) Sequences: 1(1)
	unnamed protein product [Homo sapiens]
	EAW67976.1 Mass: 225759 Score: 42 Matches: 1(1) Sequences: 1(1)
	cytoskeleton associated protein 5 [Homo sapiens]
	NP_001008938.1 Mass: 225352 Score: 42 Matches: 1(1) Sequences: 1(1)
	cytoskeleton-associated protein 5 isoform a [Homo sapiens]
45.	BAB15438.1 Mass: 46890 Score: 42 Matches: 2(2) Sequences: 1(1) emPAI: 0.07
	unnamed protein product [Homo sapiens]
	Query	Observed	Mr(expt)	Mr(calc)	ppm	Miss	Score	Expect	Rank	Unique	Peptide
	4483	338.2049	674.3952	674.3963	-1.64	0	(26)	0.02	2	U	R.ISIGSAK.K
	4484	675.4030	674.3957	674.3963	-0.78	0	38	0.0013	1	U	R.ISIGSAK.K
	Proteins matching the same set of peptides:
	EAW99829.1 Mass: 37697 Score: 42 Matches: 2(2) Sequences: 1(1)
	hypothetical protein FLJ20558, isoform CRA_b [Homo sapiens]
	NP_001335687.1 Mass: 64036 Score: 42 Matches: 2(2) Sequences: 1(1)
	uncharacterized protein C2orf42 [Homo sapiens]
46.	BAA37142.1 Mass: 80294 Score: 42 Matches: 1(1) Sequences: 1(1) emPAI: 0.04
	Acyl-CoA synthetase 3 [Homo sapiens]
	Query	Observed	Mr(expt)	Mr(calc)	ppm	Miss	Score	Expect	Rank	Unique	Peptide
	7929	865.4804	4322.3657	4322.3587	1.60	1	42	0.0046	1	U	K.LKHTINPILLYFIHFLISLYTILTYIPFYFFSESR.Q
	Proteins matching the same set of peptides:
	BAG37187.1 Mass: 80296 Score: 42 Matches: 1(1) Sequences: 1(1)
	unnamed protein product [Homo sapiens]
	BAG51167.1 Mass: 79172 Score: 42 Matches: 1(1) Sequences: 1(1)
	unnamed protein product [Homo sapiens]
	NP_001341087.1 Mass: 80368 Score: 42 Matches: 1(1) Sequences: 1(1)
	fatty acid CoA ligase Acsl3 [Homo sapiens]
	KAI2527192.1 Mass: 10891 Score: 42 Matches: 1(1) Sequences: 1(1)
	acyl-CoA synthetase long chain family member 3, partial [Homo sapiens]
	KAI2527193.1 Mass: 10066 Score: 42 Matches: 1(1) Sequences: 1(1)
	acyl-CoA synthetase long chain family member 3, partial [Homo sapiens]
47.	AAI37478.1 Score: 42 Matches: 1(1) Sequences: 1(1)
	Adenosine deaminase, RNA-specific, B2 (RED2 homolog rat) [Homo sapiens]
	Query	Observed	Mr(expt)	Mr(calc)	ppm	Miss	Score	Expect	Rank	Unique	Peptide
	4895	372.2240	742.4334	742.4337	-0.34	0	42	0.0046	3	U	R.AAELALR.S
	Proteins matching the same set of peptides:
	NP_061172.1 Score: 42 Matches: 1(1) Sequences: 1(1)
	double-stranded RNA-specific editase B2 [Homo sapiens]
48.	EAW51804.1 Mass: 70683 Score: 41 Matches: 1(1) Sequences: 1(1) emPAI: 0.04
	splicing factor 3b, subunit 3, 130kDa, isoform CRA_b [Homo sapiens]
	Query	Observed	Mr(expt)	Mr(calc)	ppm	Miss	Score	Expect	Rank	Unique	Peptide
	7074	744.8820	1487.7495	1487.7468	1.82	0	41	0.025	1	U	R.TVLDPVTGDLSDTR.T
	Proteins matching the same set of peptides:
	BAG52033.1 Mass: 99859 Score: 41 Matches: 1(1) Sequences: 1(1)
	unnamed protein product [Homo sapiens]
	CAB56791.1 Mass: 135507 Score: 41 Matches: 1(1) Sequences: 1(1)
	spliceosomal protein SAP 130 [Homo sapiens]
	AAH68974.1 Mass: 135432 Score: 41 Matches: 1(1) Sequences: 1(1)
	Splicing factor 3b, subunit 3, 130kDa [Homo sapiens]
	BAF84457.1 Mass: 135493 Score: 41 Matches: 1(1) Sequences: 1(1)
	unnamed protein product [Homo sapiens]
	NP_001071319.1 Mass: 135492 Score: 41 Matches: 1(1) Sequences: 1(1)
	splicing factor 3B subunit 3 [Bos taurus]
49.	BAS02858.1 Mass: 7148 Score: 40 Matches: 1(1) Sequences: 1(1) emPAI: 0.48
	T cell receptor alpha chain V-J-region, partial [Homo sapiens]
	Query	Observed	Mr(expt)	Mr(calc)	ppm	Miss	Score	Expect	Rank	Unique	Peptide
	5380	421.7577	841.5008	841.5022	-1.57	0	40	0.015	1	U	K.GITLSVRP.-
	Proteins matching the same set of peptides:
	BAS02935.1 Mass: 6332 Score: 40 Matches: 1(1) Sequences: 1(1)
	T cell receptor alpha chain V-J-region, partial [Homo sapiens]
	BAS03310.1 Mass: 12419 Score: 40 Matches: 1(1) Sequences: 1(1)
	T cell receptor alpha chain V-J-region, partial [Homo sapiens]
	BAS03471.1 Mass: 12148 Score: 40 Matches: 1(1) Sequences: 1(1)
	T cell receptor alpha chain V-J-region, partial [Homo sapiens]
	ANO54722.1 Mass: 4375 Score: 40 Matches: 1(1) Sequences: 1(1)
	T-cell receptor alpha chain variable region, partial [Homo sapiens]
	ANO54725.1 Mass: 4830 Score: 40 Matches: 1(1) Sequences: 1(1)
	T-cell receptor alpha chain variable region, partial [Homo sapiens]
	ANO54729.1 Mass: 10824 Score: 40 Matches: 1(1) Sequences: 1(1)
	T-cell receptor alpha chain variable region, partial [Homo sapiens]
	ANO55275.1 Mass: 8051 Score: 40 Matches: 1(1) Sequences: 1(1)
	T-cell receptor alpha chain variable region, partial [Homo sapiens]
	ANO55677.1 Mass: 8525 Score: 40 Matches: 1(1) Sequences: 1(1)
	T-cell receptor alpha chain variable region, partial [Homo sapiens]
	ANO55730.1 Mass: 10578 Score: 40 Matches: 1(1) Sequences: 1(1)
	T-cell receptor alpha chain variable region, partial [Homo sapiens]
	ANO56727.1 Mass: 10551 Score: 40 Matches: 1(1) Sequences: 1(1)
	T-cell receptor alpha chain variable region, partial [Homo sapiens]
	AAB86742.1 Mass: 2212 Score: 40 Matches: 1(1) Sequences: 1(1)
	putative, partial [Homo sapiens]
50.	CAD89906.1 Mass: 145052 Score: 40 Matches: 1(1) Sequences: 1(1) emPAI: 0.02
	hypothetical protein [Homo sapiens]
	Query	Observed	Mr(expt)	Mr(calc)	ppm	Miss	Score	Expect	Rank	Unique	Peptide
	5343	416.7297	831.4448	831.4450	-0.24	0	40	0.031	1	U	K.ISSLEQR.L
51.	AAG01393.1 Score: 33 Matches: 1(1) Sequences: 1(1)
	LENG1 protein, partial [Homo sapiens]
	Query	Observed	Mr(expt)	Mr(calc)	ppm	Miss	Score	Expect	Rank	Unique	Peptide
	4895	372.2240	742.4334	742.4337	-0.34	0	33	0.038	4	U	R.AEALLAR.V
	Proteins matching the same set of peptides:
	AAH14986.1 Score: 33 Matches: 1(1) Sequences: 1(1)
	Leukocyte receptor cluster (LRC) member 1 [Homo sapiens]
	NP_077292.2 Score: 33 Matches: 1(1) Sequences: 1(1)
	leukocyte receptor cluster member 1 [Homo sapiens]
52.	EAX05861.1 Score: 33 Matches: 1(1) Sequences: 1(1)
	hypothetical protein MGC35043, isoform CRA_a [Homo sapiens]
	Query	Observed	Mr(expt)	Mr(calc)	ppm	Miss	Score	Expect	Rank	Unique	Peptide
	4895	372.2240	742.4334	742.4337	-0.34	0	33	0.04	5	U	K.AAIEIAR.L
	Proteins matching the same set of peptides:
	EAX05863.1 Score: 33 Matches: 1(1) Sequences: 1(1)
	hypothetical protein MGC35043, isoform CRA_c [Homo sapiens]
	EAX05865.1 Score: 33 Matches: 1(1) Sequences: 1(1)
	hypothetical protein MGC35043, isoform CRA_e [Homo sapiens]
	AAH34296.1 Score: 33 Matches: 1(1) Sequences: 1(1)
	Chromosome 4 open reading frame 22 [Homo sapiens]
	BAC87545.1 Score: 33 Matches: 1(1) Sequences: 1(1)
	unnamed protein product [Homo sapiens]
	NP_689983.2 Score: 33 Matches: 1(1) Sequences: 1(1)
	cilia- and flagella-associated protein 299 isoform 2 [Homo sapiens]
	NP_001193926.1 Score: 33 Matches: 1(1) Sequences: 1(1)
	cilia- and flagella-associated protein 299 isoform 1 [Homo sapiens]
	KAI2534816.1 Score: 33 Matches: 1(1) Sequences: 1(1)
	cilia and flagella associated protein 299 [Homo sapiens]
	XP_011530118.2 Score: 33 Matches: 1(1) Sequences: 1(1)
	cilia- and flagella-associated protein 299 isoform X6 [Homo sapiens]
	XP_016863465.1 Score: 33 Matches: 1(1) Sequences: 1(1)
	cilia- and flagella-associated protein 299 isoform X3 [Homo sapiens]
	XP_016863466.1 Score: 33 Matches: 1(1) Sequences: 1(1)
	cilia- and flagella-associated protein 299 isoform X5 [Homo sapiens]
	XP_047305931.1 Score: 33 Matches: 1(1) Sequences: 1(1)
	cilia- and flagella-associated protein 299 isoform X1 [Homo sapiens]
53.	Q96Q06.2 Mass: 134349 Score: 31 Matches: 2(2) Sequences: 1(1) emPAI: 0.02
	RecName: Full=Perilipin-4; AltName: Full=Adipocyte protein S3-12 [Homo sapiens]
	Query	Observed	Mr(expt)	Mr(calc)	ppm	Miss	Score	Expect	Rank	Unique	Peptide
	4483	338.2049	674.3952	674.3963	-1.66	0	28	0.013	1	U	K.TVLSGAK.D
	4484	675.4030	674.3957	674.3963	-0.80	0	(24)	0.027	2	U	K.TVLSGAK.D
	Proteins matching the same set of peptides:
	AAI53819.1 Mass: 64692 Score: 31 Matches: 2(2) Sequences: 1(1)
	KIAA1881 protein, partial [Homo sapiens]
	BAB67774.1 Mass: 132978 Score: 31 Matches: 2(2) Sequences: 1(1)
	KIAA1881 protein, partial [Homo sapiens]
	EAW69214.1 Mass: 132734 Score: 31 Matches: 2(2) Sequences: 1(1)
	hCG1646516 [Homo sapiens]
	NP_001354797.1 Mass: 135809 Score: 31 Matches: 2(2) Sequences: 1(1)
	perilipin-4 isoform 2 [Homo sapiens]
	NP_001380817.1 Mass: 135937 Score: 31 Matches: 2(2) Sequences: 1(1)
	perilipin-4 isoform 1 [Homo sapiens]
	KAI2588032.1 Mass: 135893 Score: 31 Matches: 2(2) Sequences: 1(1)
	perilipin 4 [Homo sapiens]
	KAI2588033.1 Mass: 134305 Score: 31 Matches: 2(2) Sequences: 1(1)
	perilipin 4 [Homo sapiens]
	KAI4039701.1 Mass: 134281 Score: 31 Matches: 2(2) Sequences: 1(1)
	perilipin 4 [Homo sapiens]
	KAI4039702.1 Mass: 135869 Score: 31 Matches: 2(2) Sequences: 1(1)
	perilipin 4 [Homo sapiens]
	XP_011526535.1 Mass: 142566 Score: 31 Matches: 2(2) Sequences: 1(1)
	perilipin-4 isoform X2 [Homo sapiens]
	XP_016882681.1 Mass: 142694 Score: 31 Matches: 2(2) Sequences: 1(1)
	perilipin-4 isoform X1 [Homo sapiens]
54.	CAA34595.1 Score: 25 Matches: 1(1) Sequences: 1(1)
	KUP protein [Homo sapiens]
	Query	Observed	Mr(expt)	Mr(calc)	ppm	Miss	Score	Expect	Rank	Unique	Peptide
	5156	397.2445	792.4745	792.4745	-0.08	0	25	0.039	2	U	R.LSSFIVK.E
	Proteins matching the same set of peptides:
	NP_001291436.1 Score: 25 Matches: 1(1) Sequences: 1(1)
	zinc finger and BTB domain-containing protein 25 isoform a [Homo sapiens]
	NP_001341611.1 Score: 25 Matches: 1(1) Sequences: 1(1)
	zinc finger and BTB domain-containing protein 25 isoform c [Homo sapiens]
	NP_001341612.1 Score: 25 Matches: 1(1) Sequences: 1(1)
	zinc finger and BTB domain-containing protein 25 isoform d [Homo sapiens]

## Sheet: 2
Database : NCBIprot 20220703 (490684465 sequences; 189905115401 residues)
Taxonomy : Homo sapiens (human) (438061 sequences)
Enzyme : Trypsin
Variable modifications : Acetyl (Protein N-term),Oxidation (M),Gln->pyro-Glu (N-term Q),Carbamidomethyl (C)
Mass values : Monoisotopic
Protein Mass : Unrestricted
Peptide Mass Tolerance : ± 15 ppm
Fragment Mass Tolerance: ± 30 mmu
Max Missed Cleavages : 3
Instrument type : ESI-TRAP
Number of queries : 7951
Protein hits :	AAB37765.1	RasGAP-related protein [Homo sapiens]
	AAH51800.1	CLTC protein [Homo sapiens]
	NP_004437.2	bifunctional glutamate/proline--tRNA ligase [Homo sapiens]
	AAG41947.1	keratin 1 [Homo sapiens]
	BAG54637.1	unnamed protein product [Homo sapiens]
	NP_003741.1	eukaryotic translation initiation factor 3 subunit A [Homo sapiens]
	NP_000217.2	keratin, type I cytoskeletal 9 [Homo sapiens]
	BAF82705.1	unnamed protein product [Homo sapiens]
	NP_004095.4	fatty acid synthase [Homo sapiens]
	NP_000412.4	keratin, type I cytoskeletal 10 isoform 1 [Homo sapiens]
	NP_001164.2	rho GTPase-activating protein 5 isoform b [Homo sapiens]
	AAH41098.1	UDP-glucose ceramide glucosyltransferase-like 1 [Homo sapiens]
	NP_000170.1	DNA mismatch repair protein Msh6 isoform 1 [Homo sapiens]
	AAI13615.1	Gem (nuclear organelle) associated protein 5 [Homo sapiens]
	NP_001826.3	clathrin heavy chain 2 isoform 2 [Homo sapiens]
	AAA59553.1	microtubule-associated protein 4 [Homo sapiens]
	BAF85234.1	unnamed protein product [Homo sapiens]
	NP_001269588.1	ubiquitin carboxyl-terminal hydrolase 47 isoform a [Homo sapiens]
	AAL04167.1	centaurin delta2 [Homo sapiens]
	NP_000414.2	keratin, type II cytoskeletal 2 epidermal [Homo sapiens]
	NP_001363793.1	plexin-B2 isoform 1 precursor [Homo sapiens]
	AAI36252.1	GRB10 interacting GYF protein 2 [Homo sapiens]
	NP_000692.2	sodium/potassium-transporting ATPase subunit alpha-1 isoform a [Homo sapiens]
	AAA21833.1	autoantigen [Homo sapiens]
	NP_006507.2	solute carrier family 2, facilitated glucose transporter member 1 [Homo sapiens]
	AAI06030.1	USP19 protein, partial [Homo sapiens]
	NP_004944.3	eukaryotic translation initiation factor 4 gamma 1 isoform 4 [Homo sapiens]
	NP_001035887.1	monocarboxylate transporter 4 [Homo sapiens]
	AAL11993.1	tumor endothelial marker 6 [Homo sapiens]
	NP_000468.1	albumin preproprotein [Homo sapiens]
	NP_001672.1	sarcoplasmic/endoplasmic reticulum calcium ATPase 2 isoform a [Homo sapiens]
	AAB05994.1	putative transmembrane protein precursor [Homo sapiens]
	NP_005545.1	keratin, type II cytoskeletal 6A [Homo sapiens]
	NP_001143.2	ADP/ATP translocase 2 [Homo sapiens]
	NP_055506.1	RNA helicase aquarius [Homo sapiens]
	EAX00324.1	echinoderm microtubule associated protein like 4 [Homo sapiens]
	NP_004475.1	glypican-3 isoform 2 precursor [Homo sapiens]
	EAW62809.1	isoleucine-tRNA synthetase, isoform CRA_a [Homo sapiens]
	NP_000205.1	protein jagged-1 precursor [Homo sapiens]
	AAH00062.1	Solute carrier family 1 (neutral amino acid transporter), member 5 [Homo sapiens]
	BAA32484.1	AF-6 [Homo sapiens]
	AAP06954.1	IQGAP3 [Homo sapiens]
	Q5VTE0.1	PUTATIVE PSEUDOGENE: RecName: Full=Putative elongation factor 1-alpha-like 3; Short=EF-1-alpha-like 3; AltName: Full=Eukaryotic elongation factor 1 A-like 3; Short=eEF1A-like 3; AltName: Full=Eukaryotic translation elongation factor 1 alpha-1 pseudo
	BAS02858.1	T cell receptor alpha chain V-J-region, partial [Homo sapiens]
	NP_001667.4	potassium-transporting ATPase alpha chain 2 isoform 2 [Homo sapiens]
	AAH22792.1	VPRBP protein [Homo sapiens]
	NP_002262.4	importin-5 [Homo sapiens]
	NP_002947.1	CAP-Gly domain-containing linker protein 1 isoform a [Homo sapiens]
	AAD09924.1	plasma membrane calcium ATPase isoform 1, partial [Homo sapiens]
	NP_071934.3	inverted formin-2 isoform 1 [Homo sapiens]
	BAH12782.1	unnamed protein product [Homo sapiens]
	AAH04232.1	CAND1 protein, partial [Homo sapiens]
	NP_005879.1	phosphate carrier protein, mitochondrial isoform a precursor [Homo sapiens]
	NP_000005.3	alpha-2-macroglobulin isoform a precursor [Homo sapiens]
	NP_002430.3	DNA mismatch repair protein Msh3 [Homo sapiens]
	AAI36269.1	PEG3 protein [Homo sapiens]
	NP_003861.1	ras GTPase-activating-like protein IQGAP1 [Homo sapiens]
	AAH08938.1	Histocompatibility (minor) 13 [Homo sapiens]
	CAH18093.1	hypothetical protein, partial [Homo sapiens]
	NP_444513.1	dermcidin isoform 1 preproprotein [Homo sapiens]
	BAK64151.1	ral GTPase-activating protein subunit beta, partial [Homo sapiens]
	BAH12140.1	unnamed protein product [Homo sapiens]
	AAI37478.1	Adenosine deaminase, RNA-specific, B2 (RED2 homolog rat) [Homo sapiens]
	NP_003623.1	contactin-associated protein 1 precursor [Homo sapiens]
	NP_037522.1	cell surface hyaluronidase isoform a [Homo sapiens]
	AAS49899.1	death inducer-obliterator-3 [Homo sapiens]
	EAX00350.1	son of sevenless homolog 1 (Drosophila), isoform CRA_a [Homo sapiens]
	EAX05861.1	hypothetical protein MGC35043, isoform CRA_a [Homo sapiens]
	NP_000036.2	arginase-1 isoform 2 [Homo sapiens]
	2B5L_A	Chain A, damage-specific DNA binding protein 1 [Homo sapiens]
	KAI2555259.1	sperm associated antigen 6, partial [Homo sapiens]
1.	AAB37765.1 Mass: 180500 Score: 2050 Matches: 51(51) Sequences: 47(47) emPAI: 1.26
	RasGAP-related protein [Homo sapiens]
	Query	Observed	Mr(expt)	Mr(calc)	ppm	Miss	Score	Expect	Rank	Unique	Peptide
	4369	688.3991	687.3918	687.3915	0.45	0	50	0.00024	1	U	R.NLGSVAK.V
	4741	382.7186	763.4227	763.4228	-0.15	0	31	0.036	1		R.NGVYLAK.L
	5056	410.7130	819.4115	819.4127	-1.45	0	40	0.019	1	U	K.ESWLTGK.E
	5294	434.2869	866.5593	866.5589	0.44	0	31	0.023	1	U	R.QLLAPVVK.E
	5585	461.2300	920.4455	920.4451	0.42	0	45	0.0074	1	U	K.LGDSESVSK.V
	5724	481.2691	960.5237	960.5240	-0.29	0	60	0.00025	1	U	K.ANTLSQLSK.T
	5725	481.2819	960.5492	960.5491	0.02	0	46	0.0053	1	U	K.SSDILSVLK.S
	5751	484.2704	966.5263	966.5247	1.69	0	38	0.031	1	U	K.VLQHAASNK.L
	5756	484.7437	967.4728	967.4723	0.54	0	49	0.0019	1	U	R.DHNNEIVK.I
	5762	485.3264	968.6383	968.6382	0.06	1	38	0.0049	1	U	K.KLIIDVIR.N
	5772	487.2876	972.5606	972.5604	0.21	1	40	0.029	1	U	R.LREEVVTK.I
	5786	489.7477	977.4808	977.4818	-1.03	0	46	0.0067	1	U	R.VSSDGSWLK.L
	5913	504.7903	1007.5661	1007.5651	1.00	0	44	0.005	1	U	R.YANTLLSVK.L
	5966	512.2592	1022.5038	1022.5033	0.49	0	48	0.0033	1	U	K.IYDVEQTR.Y
	6082	522.7885	1043.5623	1043.5611	1.21	0	58	0.00052	1	U	K.LEASIENLR.R
	6123	527.2436	1052.4726	1052.4774	-4.58	0	71	9.1e-006	1	U	R.YGSIVDDER.L
	6234	540.2377	1078.4608	1078.4601	0.68	0	(48)	0.0015	1	U	R.LSAEEMDER.R
	6291	548.2349	1094.4552	1094.4550	0.18	0	56	0.00019	1	U	R.LSAEEMDER.R
	6327	555.8188	1109.6230	1109.6233	-0.25	0	49	0.0019	1	U	K.IVGNLLYYR.Y
	6360	562.2382	1122.4618	1122.4611	0.58	0	45	0.0022	1	U	K.NSCISEEER.D
	6407	571.3146	1140.6147	1140.6139	0.76	0	47	0.004	1	U	R.SPAIGLNNLDK.A
	6412	571.8301	1141.6456	1141.6455	0.10	0	42	0.016	1	U	K.LQQTLNALNK.K
	6446	576.3060	1150.5975	1150.5982	-0.62	1	52	0.0016	1	U	K.KIYDVEQTR.Y
	6527	588.8229	1175.6313	1175.6299	1.24	0	61	0.00041	1	U	R.FQATSSGPILR.E
	6556	593.8438	1185.6729	1185.6717	1.02	0	77	5.5e-006	1	U	K.GIAEQTVVTLR.N
	6668	414.5628	1240.6665	1240.6663	0.14	0	(54)	0.00078	1	U	R.ITLEDVISHSK.K
	6669	621.3409	1240.6673	1240.6663	0.82	0	68	3e-005	1	U	R.ITLEDVISHSK.K
	6738	635.3206	1268.6267	1268.6262	0.39	0	52	0.0014	1	U	R.HTDNTVQWLR.A
	6750	639.3174	1276.6202	1276.6187	1.19	0	69	3.7e-005	1	U	K.FPDATEDELLK.I
	6796	651.2873	1300.5601	1300.5605	-0.27	0	44	0.0037	1	U	K.EACNVPEPEEK.F
	6862	666.2745	1330.5344	1330.5353	-0.70	0	43	0.0019	1	U	K.YDYYYNTDSK.E
	6913	683.4093	1364.8040	1364.8027	0.96	0	74	3.4e-006	1	U	K.LGIAPQIQDLLGK.V
	6915	683.8469	1365.6792	1365.6776	1.13	0	75	7.2e-006	1	U	R.QTFIDNTDSVVK.I
	7022	715.3504	1428.6862	1428.6845	1.24	0	74	1e-005	1	U	R.TLEQTGHVSSENK.Y
	7074	486.9124	1457.7155	1457.7150	0.33	0	(45)	0.0072	1	U	K.SFLHEQEENVVK.I
	7075	729.8658	1457.7171	1457.7150	1.43	0	59	0.00042	1	U	K.SFLHEQEENVVK.I
	7077	730.3231	1458.6316	1458.6303	0.87	1	73	4.3e-006	1	U	K.KYDYYYNTDSK.E
	7120	743.3293	1484.6441	1484.6453	-0.78	0	45	0.003	1	U	K.VDFTEEEISNMR.K
	7130	745.4170	1488.8194	1488.8188	0.44	0	55	0.00067	1	U	K.SLIINTNPVEVYK.A
	7140	748.4252	1494.8358	1494.8406	-3.21	0	78	2.9e-006	1	U	K.TLVGSENPPLTVIR.K
	7171	759.8603	1517.7060	1517.7038	1.45	0	75	6.3e-006	1	U	K.IFYPETTDVYDR.K
	7278	874.9096	1747.8047	1747.8047	0.01	0	86	5.9e-007	1	U	K.GGEMEILNNTDNQGIK.S
	7321	627.6335	1879.8788	1879.8774	0.74	0	55	0.00079	1	U	R.QNIAYEYLCHLEEAK.R
	7363	984.0049	1965.9952	1965.9935	0.86	0	94	1.6e-007	1	U	K.LPYDVTTEQALTYPEVK.N
	7398	1015.9741	2029.9337	2029.9309	1.38	0	81	1.7e-006	1	U	K.AAFYEEQINYYDTYIK.T
	7407	683.6762	2048.0066	2048.0062	0.22	0	64	0.00015	1	U	R.DAYEELLTQAEIQGNINK.V
	7431	705.3646	2113.0719	2113.0691	1.29	0	(85)	1.2e-006	1	U	R.NPNAVLTLVDDNLAPEYQK.E
	7432	1057.5435	2113.0724	2113.0691	1.54	0	101	3.1e-008	1	U	R.NPNAVLTLVDDNLAPEYQK.E
	7603	1179.0723	2356.1300	2356.1183	4.97	0	149	9e-013	1	U	K.VLWLDEIQQAVDEANVDEDR.A
	7682	843.4507	2527.3302	2527.3282	0.80	0	49	0.0047	1	U	R.QAAVDHINAVIPEGDPENTLLALK.K
	7813	977.5359	2929.5858	2929.5760	3.36	0	84	8.1e-007	1	U	K.IGGILANELSVDEAALHAAVIAINEAVEK.G
2.	AAH51800.1 Mass: 187771 Score: 1394 Matches: 36(36) Sequences: 35(35) emPAI: 0.77
	CLTC protein [Homo sapiens]
	Query	Observed	Mr(expt)	Mr(calc)	ppm	Miss	Score	Expect	Rank	Unique	Peptide
	5081	413.7790	825.5434	825.5436	-0.22	0	32	0.023	1	U	K.NLILVVR.G
	5092	414.7156	827.4167	827.4177	-1.30	0	34	0.044	1	U	R.AVNYFSK.V
	5657	469.7449	937.4752	937.4756	-0.41	0	50	0.0027	1	U	K.EAIDSYIK.A
	5672	472.2533	942.4920	942.4923	-0.32	0	42	0.011	1	U	K.HELIEFR.R
	6075	522.2249	1042.4353	1042.4356	-0.28	0	31	0.043	1	U	R.ENPYYDSR.V
	6196	535.2761	1068.5377	1068.5386	-0.84	0	38	0.031	1		R.AHIAQLCEK.A
	6205	536.3137	1070.6128	1070.6124	0.30	0	51	0.002	1	U	K.HDVVFLITK.Y
	6328	555.8377	1109.6607	1109.6597	0.96	0	43	0.0033	1	U	K.LLLPWLEAR.I
	6367	563.7986	1125.5826	1125.5818	0.69	0	51	0.0026	1	U	K.VANVELYYR.A
	6424	573.2427	1144.4709	1144.4706	0.26	0	52	0.00026	1	U	K.DAMQYASESK.D
	6515	585.2297	1168.4448	1168.4455	-0.58	0	45	0.00086	1	U	R.ESNCYDPER.V
	6542	592.7573	1183.5001	1183.5002	-0.09	0	34	0.028	1	U	K.EVCFACVDGK.E
	6642	411.5542	1231.6408	1231.6408	-0.03	1	52	0.0022	1	U	K.VDKLDASESLR.K
	6703	626.8342	1251.6538	1251.6533	0.40	0	40	0.032	1		K.TLQIFNIEMK.S
	6791	648.8389	1295.6632	1295.6622	0.75	0	62	0.00017	1	U	K.LLYNNVSNFGR.L
	6801	652.8333	1303.6521	1303.6520	0.03	0	57	0.00068	1	U	R.NNLAGAEELFAR.K
	6865	667.8209	1333.6273	1333.6262	0.81	0	75	6.2e-006	1	U	K.IYIDSNNNPER.F
	6894	677.4274	1352.8402	1352.8391	0.81	0	43	0.0017	1		R.NLQNLLILTAIK.A
	6920	456.9039	1367.6898	1367.6906	-0.56	0	74	4.5e-005	1	U	K.NNRPSEGPLQTR.L
	6946	694.3714	1386.7282	1386.7289	-0.49	0	92	2.2e-007	1	U	R.QNLQICVQVASK.Y
	6953	696.3407	1390.6668	1390.6650	1.34	0	64	0.00011	1		K.LECSEELGDLVK.S
	6993	472.5812	1414.7219	1414.7205	1.00	0	(65)	8.3e-005	1		K.IVLDNSVFSEHR.N
	6994	708.3682	1414.7219	1414.7205	1.01	0	87	5.2e-007	1		K.IVLDNSVFSEHR.N
	7083	488.9175	1463.7306	1463.7296	0.67	0	47	0.0063	1	U	R.ALEHFTDLYDIK.R
	7115	740.4042	1478.7938	1478.7922	1.08	0	55	0.00085	1		K.VGYTPDWIFLLR.N
	7127	496.2453	1485.7142	1485.7147	-0.34	1	46	0.0069	1		K.RDPHLACVAYER.G
	7161	754.3829	1506.7512	1506.7501	0.74	0	62	0.00022	1	U	K.VIQCFAETGQVQK.I
	7172	506.9204	1517.7394	1517.7409	-0.97	0	61	0.00022	1	U	R.HSSLAGCQIINYR.T
	7233	778.4301	1554.8455	1554.8440	1.02	0	79	2.6e-006	1		K.LTDQLPLIIVCDR.F
	7269	572.9623	1715.8650	1715.8631	1.11	0	65	0.00011	1	U	K.VSQPIEGHAASFAQFK.M
	7286	444.9636	1775.8255	1775.8260	-0.31	0	43	0.012	1	U	R.IHEGCEEPATHNALAK.I
	7348	649.0232	1944.0477	1944.0469	0.43	0	48	0.0046	1	U	K.LHIIEVGTPPTGNQPFPK.K
	7368	657.6819	1970.0238	1970.0221	0.86	0	97	7.2e-008	1	U	R.LASTLVHLGEYQAAVDGAR.K
	7382	668.3460	2002.0162	2002.0160	0.12	1	60	0.00038	1	U	R.KDPELWGSVLLESNPYR.R
	7595	785.0890	2352.2451	2352.2438	0.59	0	91	2.4e-007	1	U	R.ISGETIFVTAPHEATAGIIGVNR.K
	7908	875.1969	3496.7585	3496.7449	3.88	0	76	1e-005	1	U	R.AVVHTHLLNPEWLVNYFGSLSVEDSLECLR.A
	Proteins matching the same set of peptides:
	NP_001139599.1 Mass: 191493 Score: 1394 Matches: 36(36) Sequences: 35(35)
	clathrin heavy chain 1 [Sus scrofa]
	NP_001275582.1 Mass: 191936 Score: 1394 Matches: 36(36) Sequences: 35(35)
	clathrin heavy chain 1 isoform 2 [Homo sapiens]
	XP_005003559.1 Mass: 192276 Score: 1394 Matches: 36(36) Sequences: 35(35)
	clathrin heavy chain 1 isoform X1 [Cavia porcellus]
3.	NP_004437.2 Mass: 170483 Score: 1366 Matches: 37(37) Sequences: 36(36) emPAI: 0.91
	bifunctional glutamate/proline--tRNA ligase [Homo sapiens]
	Query	Observed	Mr(expt)	Mr(calc)	ppm	Miss	Score	Expect	Rank	Unique	Peptide
	4716	380.2342	758.4539	758.4538	0.22	0	43	0.0047	1	U	K.IISLDAK.L
	5031	407.7609	813.5072	813.5072	-0.06	0	39	0.021	1	U	R.LLSVNIR.V
	5217	423.7136	845.4126	845.4131	-0.58	0	51	0.0017	1	U	K.EDVDAAVK.Q
	5291	433.7589	865.5033	865.5022	1.36	0	34	0.037	1	U	K.VIDPVAPR.Y
	5467	447.2217	892.4289	892.4290	-0.18	0	50	0.0022	1	U	K.NETSAPFK.E
	5580	460.2375	918.4604	918.4599	0.52	0	38	0.045	1	U	K.YYTLFGR.S
	5668	471.7720	941.5295	941.5294	0.06	0	62	0.00012	1	U	R.VAVQGDVVR.E
	5669	471.7721	941.5297	941.5294	0.31	0	43	0.0089	1	U	K.GDIIQLQR.R
	5677	472.7618	943.5089	943.5087	0.26	0	65	9.4e-005	1	U	K.VASQGEVVR.K
	5741	483.2142	964.4139	964.4138	0.12	0	55	0.0018	1	U	R.FDDTNPEK.E
	5745	483.7188	965.4229	965.4243	-1.39	0	40	0.01	1	U	R.DNYSPGWK.F
	5746	483.7450	965.4755	965.4753	0.22	0	44	0.0093	1	U	K.SCQFVAVR.R
	6200	535.8193	1069.6241	1069.6244	-0.23	1	58	0.0003	1	U	K.KGDIIQLQR.R
	6339	558.3247	1114.6347	1114.6346	0.13	0	62	0.00016	1	U	R.LNLNNTVLSK.R
	6423	572.7911	1143.5676	1143.5672	0.32	0	41	0.017	1	U	K.GNAAWQEQLK.Q
	6529	589.2833	1176.5521	1176.5510	0.93	0	44	0.0088	1	U	K.DDVSISVEEGK.E
	6557	594.8014	1187.5882	1187.5870	1.07	0	50	0.0024	1	U	K.LNQWCNVVR.W
	6590	602.8065	1203.5984	1203.5983	0.08	0	56	0.0007	1	U	K.LTVAENEAETK.L
	6667	621.3204	1240.6262	1240.6240	1.75	0	50	0.002	1	U	R.KPYIWEYSR.L
	6739	635.8053	1269.5960	1269.5951	0.73	0	42	0.011	1	U	K.MFEIVFEDPK.I
	6794	650.2820	1298.5494	1298.5496	-0.15	0	54	0.00061	1	U	K.GSQFGQSCCLR.A
	6876	671.8282	1341.6418	1341.6412	0.48	0	78	2.9e-006	1	U	R.NSEPAGLETPEAK.V
	6939	692.3088	1382.6031	1382.6024	0.54	0	49	0.0014	1	U	K.AYVDDTPAEQMK.A
	6950	694.8767	1387.7389	1387.7381	0.58	0	87	7.9e-007	1	U	K.INEAVECLLSLK.A
	7027	716.3248	1430.6351	1430.6347	0.25	0	45	0.004	1	U	R.DQDLEPGAPSMGAK.S
	7200	768.3896	1534.7646	1534.7627	1.24	0	83	2.1e-006	1	U	K.SLYDEVAAQGEVVR.K
	7213	515.9442	1544.8106	1544.8099	0.44	0	60	0.0003	1	U	K.AALLNQHYQVNFK.G
	7252	538.6281	1612.8623	1612.8613	0.63	0	65	9.1e-005	1	U	K.NPEVGLKPVWYSPK.V
	7320	468.4640	1869.8269	1869.8268	0.01	2	48	0.002	1	U	R.FDDTNPEKEKEDFEK.V
	7356	653.3469	1957.0188	1957.0165	1.15	0	43	0.019	1	U	K.SLCIPFKPLCELQPGAK.C
	7405	1023.4939	2044.9732	2044.9702	1.51	0	60	0.00028	1	U	K.EYIPGQPPLSQSSDSSPTR.N
	7427	703.0355	2106.0846	2106.0844	0.05	1	65	0.00014	1	U	K.SLIGVEYKPVSATGAEDKDK.K
	7428	527.5289	2106.0864	2106.0844	0.92	1	(52)	0.003	1	U	K.SLIGVEYKPVSATGAEDKDK.K
	7459	1097.4845	2192.9544	2192.9547	-0.13	0	78	3.2e-006	1	U	R.GFFICDQPYEPVSPYSCK.E
	7557	1156.6305	2311.2464	2311.2172	12.6	0	91	2.1e-007	1	U	K.ENILHVSENVIFTDVNSILR.Y
	7738	894.0940	2679.2601	2679.2558	1.61	0	89	4.8e-007	1	U	K.ERPTPSLNNNCTTSEDSLVLYNR.V
	7839	1035.1790	3102.5151	3102.5105	1.47	0	91	3.9e-007	1	U	K.TGQEYKPGNPPAEIGQNISSNSSASILESK.S
	Proteins matching the same set of peptides:
	EAW93309.1 Mass: 170440 Score: 1366 Matches: 37(37) Sequences: 36(36)
	glutamyl-prolyl-tRNA synthetase, isoform CRA_a [Homo sapiens]
	EAW93310.1 Mass: 171453 Score: 1366 Matches: 37(37) Sequences: 36(36)
	glutamyl-prolyl-tRNA synthetase, isoform CRA_b [Homo sapiens]
	KAI2521473.1 Mass: 170036 Score: 1366 Matches: 37(37) Sequences: 36(36)
	glutamyl-prolyl-tRNA synthetase 1 [Homo sapiens]
	KAI4084992.1 Mass: 170497 Score: 1366 Matches: 37(37) Sequences: 36(36)
	glutamyl-prolyl-tRNA synthetase 1 [Homo sapiens]
4.	AAG41947.1 Mass: 66027 Score: 991 Matches: 24(24) Sequences: 20(20) emPAI: 1.51
	keratin 1 [Homo sapiens]
	Query	Observed	Mr(expt)	Mr(calc)	ppm	Miss	Score	Expect	Rank	Unique	Peptide
	5679	473.2526	944.4906	944.4927	-2.23	1	45	0.011	1	U	R.GENALKDAK.N
	5770	487.2689	972.5232	972.5240	-0.83	0	49	0.0043	1		K.IEISELNR.V
	6039	517.2624	1032.5102	1032.5087	1.45	0	50	0.0026	1	U	R.TLLEGEESR.M
	6179	533.2642	1064.5139	1064.5138	0.07	0	38	0.037	1	U	K.AQYEDIAQK.S
	6183	533.7623	1065.5101	1065.5090	0.99	1	48	0.0035	1		K.YEDEINKR.T
	6272	546.7562	1091.4979	1091.4956	2.12	0	97	3.5e-008	1	U	R.GSGGGSSGGSIGGR.G 6271 6273 6274
	6364	563.2749	1124.5352	1124.5349	0.29	0	53	0.0011	1	U	K.AEAESLYQSK.Y
	6420	572.2716	1142.5287	1142.5278	0.79	1	57	0.00029	1	U	K.KDVDGAYMTK.V
	6585	401.2349	1200.6828	1200.6826	0.12	2	39	0.035	1	U	R.LRSEIDNVKK.Q
	6727	633.3229	1264.6312	1264.6299	1.02	0	58	0.00049	1	U	R.TNAENEFVTIK.K
	6800	651.8618	1301.7090	1301.7078	0.88	0	44	0.012	1	U	R.SLDLDSIIAEVK.A
	6814	436.8900	1307.6480	1307.6469	0.84	2	47	0.0057	1		R.NKYEDEINKR.T
	6815	654.8317	1307.6489	1307.6469	1.51	2	(38)	0.045	1		R.NKYEDEINKR.T
	6863	666.7630	1331.5114	1331.5122	-0.56	0	36	0.0061	1	U	K.NMQDMVEDYR.N
	6874	670.8378	1339.6611	1339.6619	-0.60	1	66	7.9e-005	1	U	K.SKAEAESLYQSK.Y
	6899	679.3520	1356.6895	1356.6885	0.79	0	71	2.2e-005	1	U	K.LNDLEDALQQAK.E
	6940	692.3483	1382.6821	1382.6830	-0.66	0	76	6.9e-006	1	U	K.SLNNQFASFIDK.V
	6964	465.2495	1392.7267	1392.7249	1.32	1	56	0.00081	1	U	R.TNAENEFVTIKK.D
	7106	738.3968	1474.7790	1474.7780	0.71	0	78	7e-006	1		R.FLEQQNQVLQTK.W
	7377	665.3309	1992.9708	1992.9693	0.72	0	74	1.4e-005	1	U	R.THNLEPYFESFINNLR.R
	7610	1192.4795	2382.9444	2382.9447	-0.10	0	152	1.2e-014	1	U	R.GGGGGGYGSGGSSYGSGGGSYGSGGGGGGGR.G
	Proteins matching the same set of peptides:
	NP_006112.3 Mass: 65999 Score: 991 Matches: 24(24) Sequences: 20(20)
	keratin, type II cytoskeletal 1 [Homo sapiens]
	AFA52002.1 Mass: 66013 Score: 991 Matches: 24(24) Sequences: 20(20)
	keratin 1 [Homo sapiens]
	AFA52003.1 Mass: 66029 Score: 991 Matches: 24(24) Sequences: 20(20)
	keratin 1 [Homo sapiens]
	AFA52004.1 Mass: 65930 Score: 991 Matches: 24(24) Sequences: 20(20)
	keratin 1 [Homo sapiens]
	AFA52005.1 Mass: 66086 Score: 991 Matches: 24(24) Sequences: 20(20)
	keratin 1 [Homo sapiens]
	AFA52007.1 Mass: 66071 Score: 991 Matches: 24(24) Sequences: 20(20)
	keratin 1 [Homo sapiens]
5.	BAG54637.1 Mass: 144366 Score: 923 Matches: 26(26) Sequences: 26(26) emPAI: 0.73
	unnamed protein product [Homo sapiens]
	Query	Observed	Mr(expt)	Mr(calc)	ppm	Miss	Score	Expect	Rank	Unique	Peptide
	4783	388.2267	774.4387	774.4388	-0.08	0	49	0.0024	1	U	R.IPGIYGR.L
	4882	394.7162	787.4178	787.4188	-1.24	0	43	0.0067	1	U	K.AQDSVLR.T
	5738	482.7593	963.5039	963.5025	1.47	0	38	0.039	1	U	K.IFNLSGGEK.T
	6020	514.8033	1027.5921	1027.5913	0.77	0	46	0.006	1	U	K.VLDAIIQEK.K
	6024	515.7750	1029.5355	1029.5342	1.23	0	61	0.00024	1	U	R.LGDLGAIDEK.Y
	6251	543.2964	1084.5782	1084.5764	1.67	0	43	0.011	1	U	K.LPQTEQELK.E
	6296	549.7986	1097.5827	1097.5829	-0.15	0	64	7.7e-005	1	U	R.HNTAVSQLTK.A
	6322	555.2775	1108.5405	1108.5400	0.42	0	50	0.002	1	U	K.LTQEETNFK.S
	6384	566.7908	1131.5670	1131.5659	0.95	0	48	0.0044	1	U	K.EVDDLTAELK.S
	6426	573.3248	1144.6350	1144.6339	0.94	0	74	1.1e-005	1	U	K.EALIAASETLK.E
	6437	575.3110	1148.6075	1148.6077	-0.16	0	72	1.9e-005	1	U	K.LLEENVSAFK.T
	6505	389.2190	1164.6351	1164.6363	-1.09	1	37	0.038	1	U	R.RVEILNEHR.G
	6523	587.8512	1173.6878	1173.6870	0.75	0	35	0.039	1	U	K.NAQFIIISLR.N
	6622	610.7991	1219.5837	1219.5833	0.32	0	63	0.00014	1	U	R.DNTSVYHISGK.K
	6654	618.3008	1234.5870	1234.5863	0.55	0	66	6.2e-005	1	U	K.QLDECASAITK.A
	6655	618.8029	1235.5913	1235.5969	-4.51	0	54	0.00087	1	U	R.FSCIIGPNGSGK.S
	6720	631.8211	1261.6277	1261.6262	1.15	0	63	0.00014	1	U	K.SNNIINETTTR.N
	6817	654.8488	1307.6831	1307.6833	-0.19	0	45	0.0099	1	U	K.VIQENEHALQK.D
	6923	685.8627	1369.7108	1369.7089	1.39	0	73	1.1e-005	1	U	K.ELEANVLATAPDK.K
	7028	716.3578	1430.7010	1430.7001	0.62	0	80	2.4e-006	1	U	R.DTLVADNLDQATR.V
	7029	477.9282	1430.7627	1430.7630	-0.23	0	46	0.0085	1	U	R.LHNTIVEINNHK.L
	7079	731.8812	1461.7478	1461.7464	0.96	0	64	0.00012	1	U	K.FTQLDLEDVQVR.E
	7211	772.3833	1542.7520	1542.7525	-0.30	0	74	8.7e-006	1	U	K.NTNAAEESLPEIQK.E
	7249	802.9309	1603.8473	1603.8457	0.98	0	69	5.2e-005	1	U	R.LIEQEEYLNVQVK.E
	7303	607.9977	1820.9714	1820.9672	2.30	0	52	0.0016	1	U	K.NIAIEFLTLENEIFR.K
	7660	825.0696	2472.1871	2472.1809	2.52	1	39	0.047	1	U	K.IIDKEGDDYEVIPNSNFYVSR.T
	Proteins matching the same set of peptides:
	CAB66811.1 Mass: 147076 Score: 923 Matches: 26(26) Sequences: 26(26)
	hypothetical protein [Homo sapiens]
	EAW78642.1 Mass: 147171 Score: 923 Matches: 26(26) Sequences: 26(26)
	SMC4 structural maintenance of chromosomes 4-like 1 (yeast), isoform CRA_c [Homo sapiens]
	NP_001002800.1 Mass: 147091 Score: 923 Matches: 26(26) Sequences: 26(26)
	structural maintenance of chromosomes protein 4 isoform 1 [Homo sapiens]
	NP_001275682.1 Mass: 144365 Score: 923 Matches: 26(26) Sequences: 26(26)
	structural maintenance of chromosomes protein 4 isoform 2 [Homo sapiens]
	XP_011510614.1 Mass: 139603 Score: 923 Matches: 26(26) Sequences: 26(26)
	structural maintenance of chromosomes protein 4 isoform X2 [Homo sapiens]
6.	NP_003741.1 Mass: 166468 Score: 812 Matches: 29(29) Sequences: 29(29) emPAI: 0.70
	eukaryotic translation initiation factor 3 subunit A [Homo sapiens]
	Query	Observed	Mr(expt)	Mr(calc)	ppm	Miss	Score	Expect	Rank	Unique	Peptide
	5128	417.7188	833.4231	833.4243	-1.46	0	68	3.2e-005	1	U	R.LGDSSLSR.K
	5290	433.7423	865.4701	865.4698	0.38	0	39	0.019	1	U	K.VSTVFWK.S
	5417	441.7013	881.3880	881.3879	0.10	0	44	0.003	1	U	K.SAYEEQR.I
	5501	451.7507	901.4869	901.4869	0.05	1	47	0.0077	1	U	K.KLEEVER.K
	5572	459.2320	916.4494	916.4501	-0.84	0	39	0.032	1	U	R.ELEIEER.E
	5574	459.2473	916.4801	916.4800	0.05	0	51	0.0023	1	U	R.QCLDLLR.N
	5703	477.7973	953.5800	953.5797	0.31	0	37	0.019	1	U	R.LEEIPLIK.S
	5760	485.3103	968.6060	968.6059	0.11	0	35	0.02	1	U	R.LLLTPWVK.F
	5763	485.7530	969.4915	969.4920	-0.49	1	39	0.02	1	U	K.KIDYFER.A
	5768	486.7775	971.5404	971.5400	0.50	0	49	0.0048	1	U	R.LESLNIQR.E
	5817	494.2401	986.4657	986.4644	1.30	0	40	0.016	1	U	K.FCLQYTR.K
	5903	503.7641	1005.5136	1005.5131	0.55	0	45	0.0093	1	U	R.ANEFLEVGK.K
	5907	504.2629	1006.5113	1006.5117	-0.39	0	51	0.0022	1	U	R.ITTMQLER.E
	6018	514.7690	1027.5235	1027.5233	0.24	0	36	0.049	1	U	R.MHLSQIQR.H
	6313	553.2491	1104.4837	1104.4836	0.15	0	58	0.00012	1	U	R.GPAEESSSWR.D
	6329	555.8481	1109.6817	1109.6808	0.84	1	37	0.011	1	U	K.RLEEIPLIK.S
	6399	569.3160	1136.6175	1136.6189	-1.24	0	37	0.036	1	U	R.ILQEHEQIK.K
	6468	386.1991	1155.5755	1155.5745	0.86	2	40	0.02	1	U	R.RGLDDDRGPR.R
	6522	587.7773	1173.5400	1173.5414	-1.21	1	45	0.0057	1	U	R.KGPEADSEWR.R
	6718	631.3394	1260.6642	1260.6635	0.51	0	46	0.0068	1	U	R.LLDMDGIIVEK.Q
	6886	675.9094	1349.8042	1349.8031	0.81	0	100	6.7e-009	1	U	R.LATLLGLQAPPTR.I
	6984	470.9124	1409.7155	1409.7164	-0.61	0	48	0.0053	1	U	K.SGNALFHASTLHR.L
	6995	472.5894	1414.7464	1414.7456	0.57	0	42	0.016	1	U	K.AVEDIHGLFSLSK.K
	7032	717.9037	1433.7928	1433.7919	0.68	0	45	0.0071	1	U	R.FNVLQYVVPEVK.D
	7050	722.8578	1443.7011	1443.6994	1.21	0	62	0.00016	1	U	R.TLSFGSDLNYATR.E
	7181	761.9644	1521.9143	1521.9130	0.84	0	77	7.7e-007	1	U	R.VLLATLSIPITPER.T
	7192	510.6037	1528.7893	1528.7885	0.49	0	57	0.00085	1	U	K.EEQHQLAVTAYLK.N
	7290	890.4526	1778.8906	1778.8879	1.52	0	63	0.00021	1	U	K.DLYNWLEVEFNPLK.L
	7774	932.1511	2793.4315	2793.4297	0.67	1	54	0.0013	1	U	R.EQPEKEPELQQYVPQLQNNTILR.L
	Proteins matching the same set of peptides:
	AAI14430.1 Mass: 166369 Score: 812 Matches: 29(29) Sequences: 29(29)
	Eukaryotic translation initiation factor 3, subunit A [Homo sapiens]
	AFR31791.1 Mass: 166381 Score: 812 Matches: 29(29) Sequences: 29(29)
	eukaryotic translation initiation factor 3 [Homo sapiens]
7.	NP_000217.2 Mass: 62027 Score: 800 Matches: 19(19) Sequences: 14(14) emPAI: 0.98
	keratin, type I cytoskeletal 9 [Homo sapiens]
	Query	Observed	Mr(expt)	Mr(calc)	ppm	Miss	Score	Expect	Rank	Unique	Peptide
	5006	405.2236	808.4326	808.4330	-0.56	0	38	0.013	1		R.LASYLDK.V
	5800	491.7217	981.4287	981.4265	2.34	0	58	0.00016	1	U	R.FSSSGGGGGGGR.F 5795 5797 5798 5799 5802
	6155	530.7858	1059.5570	1059.5560	0.90	0	43	0.016	1	U	K.TLLDIDNTR.M
	6219	537.7646	1073.5146	1073.5142	0.44	0	54	0.00075	1	U	R.QFSSSYLSR.S
	6242	541.2510	1080.4874	1080.4870	0.42	0	52	0.00094	1	U	K.STMQELNSR.L
	6357	561.2958	1120.5770	1120.5764	0.54	0	63	0.00011	1	U	R.QEYEQLIAK.N
	6471	579.2993	1156.5840	1156.5836	0.28	0	79	2.2e-006	1	U	R.QGVDADINGLR.Q
	6598	603.8057	1205.5968	1205.5962	0.49	0	42	0.02	1	U	R.QVLDNLTMEK.S
	6652	618.2681	1234.5216	1234.5215	0.11	0	61	5.6e-005	1	U	R.FSSSSGYGGGSSR.V
	6846	441.8959	1322.6660	1322.6652	0.57	1	43	0.014	1	U	R.IKFEMEQNLR.Q
	7308	613.3272	1836.9598	1836.9581	0.92	0	51	0.0024	1	U	R.HGVQELEIELQSQLSK.K
	7676	837.3831	2509.1274	2509.1245	1.15	0	93	8e-008	1	U	K.EIETYHNLLEGGQEDFESSGAGK.I
	7749	902.3919	2704.1539	2704.1539	-0.00	0	68	1.2e-005	1	U	R.GGGGSFGYSYGGGSGGGFSASSLGGGFGGGSR.G
	7863	1075.0988	3222.2744	3222.2744	0.01	0	153	6.4e-015	1	U	R.GGSGGSHGGGSGFGGESGGSYGGGEEASGSGGGYGGGSGK.S
8.	BAF82705.1 Mass: 157775 Score: 746 Matches: 21(21) Sequences: 21(21) emPAI: 0.50
	unnamed protein product [Homo sapiens]
	Query	Observed	Mr(expt)	Mr(calc)	ppm	Miss	Score	Expect	Rank	Unique	Peptide
	5090	414.2710	826.5275	826.5276	-0.11	0	34	0.023	1	U	R.LLAEILR.E
	5286	432.2473	862.4800	862.4800	-0.00	0	42	0.011	1	U	K.LDDLFLK.R
	5465	446.7662	891.5178	891.5178	0.06	0	53	0.00057	1	U	R.SSLLLGFR.R
	5549	456.2051	910.3957	910.3967	-1.08	0	37	0.02	1	U	K.VFNDTCR.S
	5974	512.7373	1023.4600	1023.4596	0.40	0	37	0.03	1	U	R.LQWFCDR.C
	5984	513.2688	1024.5230	1024.5229	0.10	0	45	0.0093	1	U	K.FSPTDFLAK.M
	6012	514.3115	1026.6085	1026.6073	1.14	0	53	0.00094	1	U	K.LQDAINILK.E
	6135	528.7712	1055.5278	1055.5287	-0.88	0	37	0.046	1	U	K.VYLQNEYK.F
	6295	549.3012	1096.5877	1096.5876	0.09	0	59	0.00023	1	U	K.IQEENVIPR.E
	6310	552.2921	1102.5695	1102.5692	0.29	0	46	0.0097	1	U	R.SCGSLLPELK.L
	6314	553.2904	1104.5663	1104.5663	-0.00	0	68	4.9e-005	1	U	R.LDSSAVLDTGK.Y
	6617	609.2822	1216.5499	1216.5506	-0.57	0	40	0.012	1	U	K.MEEANIQPNR.V
	6743	636.8306	1271.6467	1271.6470	-0.22	0	63	0.00015	1	U	K.TVLDQQQTPSR.L
	6793	649.7965	1297.5785	1297.5786	-0.11	0	62	9.9e-005	1	U	K.DIQEESTFSSR.K
	6854	664.8808	1327.7470	1327.7459	0.83	0	69	5.1e-005	1	U	K.SNTLPISLQSIR.S
	6941	692.3719	1382.7293	1382.7293	0.05	0	80	2.4e-006	1	U	K.VIEEQLEPAVEK.I
	6977	702.8433	1403.6720	1403.6715	0.36	0	59	0.00032	1	U	R.CVANNQVETLEK.L
	7142	748.8860	1495.7574	1495.7558	1.07	0	42	0.019	1	U	K.AGYPQYVSEILEK.V
	7232	519.2460	1554.7161	1554.7162	-0.05	1	41	0.016	1	U	K.EKDIQEESTFSSR.K
	7268	858.4621	1714.9096	1714.9083	0.81	0	85	1.3e-006	1	U	K.VIEPQYFGLAYLFR.K
	7713	866.8070	2597.3990	2597.3894	3.72	0	92	1.7e-007	1	U	R.LANQFAIYKPVTDFFLQLVDAGK.V
	Proteins matching the same set of peptides:
	BAC86287.1 Mass: 157862 Score: 746 Matches: 21(21) Sequences: 21(21)
	unnamed protein product [Homo sapiens]
	NP_573566.2 Mass: 157805 Score: 746 Matches: 21(21) Sequences: 21(21)
	leucine-rich PPR motif-containing protein, mitochondrial precursor [Homo sapiens]
	XP_006711978.1 Mass: 155195 Score: 746 Matches: 21(21) Sequences: 21(21)
	leucine-rich PPR motif-containing protein, mitochondrial isoform X1 [Homo sapiens]
	XP_047298765.1 Mass: 153607 Score: 746 Matches: 21(21) Sequences: 21(21)
	leucine-rich PPR motif-containing protein, mitochondrial isoform X2 [Homo sapiens]
9.	NP_004095.4 Mass: 273254 Score: 679 Matches: 19(19) Sequences: 19(19) emPAI: 0.24
	fatty acid synthase [Homo sapiens]
	Query	Observed	Mr(expt)	Mr(calc)	ppm	Miss	Score	Expect	Rank	Unique	Peptide
	5636	466.7740	931.5335	931.5338	-0.35	1	38	0.033	1	U	R.KLQELSSK.A
	5723	481.2685	960.5224	960.5240	-1.72	0	55	0.00081	1	U	K.TGTVSLEVR.L
	5926	506.8239	1011.6333	1011.6328	0.51	0	46	0.0024	1	U	R.VAAAVDLIIK.S
	6059	519.7776	1037.5407	1037.5393	1.36	0	39	0.026	1	U	R.VFTTVGSAEK.R
	6076	522.2951	1042.5756	1042.5771	-1.41	0	47	0.0051	1	U	K.AQVADVVVSR.W
	6194	535.2673	1068.5200	1068.5200	0.01	0	47	0.0037	1	U	R.DPSQQELPR.L
	6252	543.3140	1084.6135	1084.6128	0.65	0	37	0.046	1	U	R.QEPLLIGSTK.S
	6670	621.3541	1240.6937	1240.6928	0.74	0	44	0.0065	1	U	R.EVWALVQAGIR.D
	6777	645.7917	1289.5689	1289.5677	0.99	0	40	0.041	1	U	K.VYQWDDPDPR.L
	6798	651.8422	1301.6698	1301.6649	3.74	0	61	0.00025	1	U	R.AALQEELQLCK.G
	6871	670.3654	1338.7162	1338.7143	1.39	0	43	0.012	1	U	R.QQEQQVPILEK.F
	6947	694.8232	1387.6318	1387.6289	2.08	0	63	8.4e-005	1	U	K.ADEASELACPTPK.E
	7098	735.3552	1468.6959	1468.6947	0.84	0	67	4.9e-005	1	U	R.FPQLDSTSFANSR.D
	7220	775.3978	1548.7810	1548.7784	1.68	0	70	5.3e-005	1	U	R.AFEVSENGNLVVSGK.V
	7318	623.9346	1868.7819	1868.7822	-0.16	0	50	0.00058	1	U	K.FCFTPHTEEGCLSER.A
	7433	706.3494	2116.0263	2116.0185	3.66	0	102	2.2e-008	1	U	R.GTHTGVWVGVSGSETSEALSR.D
	7457	730.0402	2187.0987	2187.0961	1.19	0	56	0.00079	1	U	R.RPTPQDSPIFLPVDDTSFR.W
	7606	790.0330	2367.0772	2367.0768	0.20	0	63	0.0001	1	U	R.GYDYGPHFQGILEASLEGDSGR.L
	7786	947.4768	2839.4084	2839.4068	0.56	0	56	0.0012	1	U	R.LFDHPESPTPNPTEPLFLAQAEVYK.E
	Proteins matching the same set of peptides:
	AAH63242.1 Mass: 273227 Score: 679 Matches: 19(19) Sequences: 19(19)
	Fatty acid synthase [Homo sapiens]
	EAW89745.1 Mass: 273253 Score: 679 Matches: 19(19) Sequences: 19(19)
	fatty acid synthase [Homo sapiens]
	KAI2585806.1 Mass: 273040 Score: 679 Matches: 19(19) Sequences: 19(19)
	fatty acid synthase [Homo sapiens]
	KAI2585807.1 Mass: 273268 Score: 679 Matches: 19(19) Sequences: 19(19)
	fatty acid synthase [Homo sapiens]
	KAI4052325.1 Mass: 273026 Score: 679 Matches: 19(19) Sequences: 19(19)
	fatty acid synthase [Homo sapiens]
10.	NP_000412.4 Mass: 58792 Score: 645 Matches: 17(17) Sequences: 16(16) emPAI: 1.28
	keratin, type I cytoskeletal 10 isoform 1 [Homo sapiens]
	Query	Observed	Mr(expt)	Mr(calc)	ppm	Miss	Score	Expect	Rank	Unique	Peptide
	5000	404.2030	806.3914	806.3923	-1.00	0	46	0.0035	1	U	R.LAADDFR.L
	5006	405.2236	808.4326	808.4330	-0.56	0	38	0.013	1		R.LASYLDK.V
	5851	497.2534	992.4923	992.4927	-0.39	0	53	0.0014	1	U	K.YENEVALR.Q
	6030	516.3031	1030.5916	1030.5910	0.61	0	49	0.0036	1	U	R.VLDELTLTK.A
	6316	553.7667	1105.5189	1105.5186	0.26	0	85	6.6e-007	1	U	K.VTMQNLNDR.L
	6321	555.2492	1108.4839	1108.4825	1.22	0	35	0.034	1	U	K.DAEAWFNEK.S
	6504	583.2955	1164.5765	1164.5775	-0.83	0	50	0.0025	1	U	R.LENEIQTYR.S
	6583	601.3127	1200.6109	1200.6098	0.90	0	79	3.3e-006	1	U	R.QSVEADINGLR.R
	6650	412.2312	1233.6717	1233.6717	-0.01	1	64	9.4e-005	1	U	R.LKYENEVALR.Q
	6651	617.8434	1233.6723	1233.6717	0.52	1	(53)	0.0011	1	U	R.LKYENEVALR.Q
	6719	631.8016	1261.5886	1261.5899	-1.01	0	61	0.00017	1	U	R.SLLEGEGSSGGGGR.G
	6832	439.5348	1315.5825	1315.5826	-0.13	1	35	0.044	1	U	K.NHEEEMKDLR.N
	6910	683.3238	1364.6331	1364.6320	0.83	0	61	0.00017	1	U	R.SQYEQLAEQNR.K
	6937	691.3281	1380.6417	1380.6408	0.63	0	71	1.9e-005	1	U	R.ALEESNYELEGK.I
	6951	695.8449	1389.6753	1389.6736	1.23	0	102	1.8e-008	1	U	K.QSLEASLAETEGR.Y
	7135	498.5827	1492.7263	1492.7270	-0.47	1	43	0.018	1	U	R.SQYEQLAEQNRK.D
	7418	1041.9869	2081.9593	2081.9575	0.87	0	108	4.1e-009	1	U	R.AETECQNTEYQQLLDIK.I
	Proteins matching the same set of peptides:
	CAA32649.1 Mass: 59492 Score: 645 Matches: 17(17) Sequences: 16(16)
	unnamed protein product [Homo sapiens]
	AAH34697.1 Mass: 58792 Score: 645 Matches: 17(17) Sequences: 16(16)
	Keratin 10 [Homo sapiens]
	EAW60681.1 Mass: 63308 Score: 645 Matches: 17(17) Sequences: 16(16)
	keratin 10 (epidermolytic hyperkeratosis; keratosis palmaris et plantaris), isoform CRA_b [Homo sapiens]
	NP_001366295.1 Mass: 63308 Score: 645 Matches: 17(17) Sequences: 16(16)
	keratin, type I cytoskeletal 10 isoform 2 [Homo sapiens]
	KAI2582860.1 Mass: 59588 Score: 645 Matches: 17(17) Sequences: 16(16)
	keratin 10 [Homo sapiens]
	KAI4049370.1 Mass: 58458 Score: 645 Matches: 17(17) Sequences: 16(16)
	keratin 10 [Homo sapiens]
11.	NP_001164.2 Mass: 172224 Score: 634 Matches: 14(14) Sequences: 14(14) emPAI: 0.28
	rho GTPase-activating protein 5 isoform b [Homo sapiens]
	Query	Observed	Mr(expt)	Mr(calc)	ppm	Miss	Score	Expect	Rank	Unique	Peptide
	5603	463.7269	925.4392	925.4393	-0.01	0	40	0.015	1	U	K.YITEADSK.E
	5665	470.8129	939.6112	939.6117	-0.52	0	51	0.00037	1	U	K.KPVIIAATK.C
	5908	504.2796	1006.5447	1006.5447	-0.02	1	38	0.042	1	U	R.KFNETQIK.Q
	6303	551.3172	1100.6198	1100.6190	0.81	0	40	0.029	1	U	K.NLLVVETSAR.F
	6976	702.3851	1402.7556	1402.7569	-0.90	0	65	8.6e-005	1	U	K.HNLDVVSPIPANK.D
	7046	721.8184	1441.6223	1441.6209	0.98	0	82	7e-007	1	U	R.TQSTDDEYALDGK.I
	7183	763.3352	1524.6559	1524.6548	0.67	0	67	6.6e-005	1	U	K.ETCLSGQNCTDIK.V
	7250	537.8964	1610.6674	1610.6696	-1.37	0	33	0.026	1	U	R.THSDASDDEAFTTSK.T
	7273	576.9445	1727.8116	1727.8115	0.04	0	44	0.0092	1	U	R.ESTHQSEDVFLPSPR.D
	7289	593.6636	1777.9689	1777.9686	0.14	0	98	3.6e-008	1	U	K.VEQLLASSLLQLDHGR.L
	7313	617.2831	1848.8276	1848.8278	-0.12	0	54	0.00081	1	U	K.NHPDYEEYINLEGTR.K
	7316	928.9199	1855.8253	1855.8224	1.54	0	65	3.9e-005	1	U	K.GYSDEIYVVPDDSQNR.I
	7337	639.3140	1914.9201	1914.9171	1.57	1	90	3.5e-007	1	U	K.GGIDNPAITSDQELDDKK.M
	7395	1015.4280	2028.8414	2028.8409	0.23	0	106	1.3e-009	1	U	R.NSFVNNTQGDEENGFSDR.T
	Proteins matching the same set of peptides:
	SPT35679.1 Mass: 172578 Score: 634 Matches: 14(14) Sequences: 14(14)
	ARHGAP5, partial [Homo sapiens]
	AAH50059.1 Mass: 172322 Score: 634 Matches: 14(14) Sequences: 14(14)
	ARHGAP5 protein [Homo sapiens]
	NP_001025226.1 Mass: 172352 Score: 634 Matches: 14(14) Sequences: 14(14)
	rho GTPase-activating protein 5 isoform a [Homo sapiens]
12.	AAH41098.1 Mass: 174867 Score: 534 Matches: 13(13) Sequences: 13(13) emPAI: 0.26
	UDP-glucose ceramide glucosyltransferase-like 1 [Homo sapiens]
	Query	Observed	Mr(expt)	Mr(calc)	ppm	Miss	Score	Expect	Rank	Unique	Peptide
	5280	431.7351	861.4556	861.4556	0.03	0	49	0.0034	1	U	K.TAVSSELR.T
	5650	468.2717	934.5288	934.5335	-5.05	0	37	0.04	1	U	K.AITTSLTTK.W
	5864	499.2830	996.5514	996.5505	0.90	0	55	0.00051	1	U	K.ANPGAWILR.L
	6072	521.3010	1040.5874	1040.5866	0.74	0	49	0.0018	1	U	K.VDALLSAQPK.G
	6674	623.7909	1245.5673	1245.5666	0.61	0	52	0.00095	1	U	R.IEYQFFEDR.H
	6707	628.3380	1254.6615	1254.6608	0.50	0	94	9e-008	1	U	K.ILETTTFFQR.A
	6844	661.8593	1321.7041	1321.7030	0.77	0	57	0.00051	1	U	K.FLFVDADQIVR.T
	6870	670.3283	1338.6421	1338.6415	0.41	0	55	0.00084	1	U	K.EISYENTQISR.A
	6912	455.9415	1364.8026	1364.8028	-0.12	1	61	6.8e-005	1	U	K.VKVEHVVSVLEK.K
	6961	464.9452	1391.8139	1391.8136	0.21	0	37	0.015	1	U	R.LGIEGLSLHNVLK.L
	7260	843.9270	1685.8394	1685.8373	1.29	0	88	4.8e-007	1	U	R.SPAISWVNNLEVDSR.Y
	7327	948.4734	1894.9323	1894.9313	0.56	0	59	0.00041	1	U	K.EGETYFDVVAVVDPVTR.E
	7350	973.9739	1945.9333	1945.9309	1.24	0	88	7.3e-007	1	U	R.YVLEPEISFTSDNSFAK.G
	Proteins matching the same set of peptides:
	NP_064505.1 Mass: 177078 Score: 534 Matches: 13(13) Sequences: 13(13)
	UDP-glucose:glycoprotein glucosyltransferase 1 precursor [Homo sapiens]
	BAF85755.1 Mass: 174897 Score: 534 Matches: 13(13) Sequences: 13(13)
	unnamed protein product [Homo sapiens]
	XP_006712697.1 Mass: 176540 Score: 534 Matches: 13(13) Sequences: 13(13)
	UDP-glucose:glycoprotein glucosyltransferase 1 isoform X1 [Homo sapiens]
	XP_006712698.1 Mass: 176183 Score: 534 Matches: 13(13) Sequences: 13(13)
	UDP-glucose:glycoprotein glucosyltransferase 1 isoform X2 [Homo sapiens]
	XP_006712699.1 Mass: 176167 Score: 534 Matches: 13(13) Sequences: 13(13)
	UDP-glucose:glycoprotein glucosyltransferase 1 isoform X3 [Homo sapiens]
	XP_047301077.1 Mass: 175644 Score: 534 Matches: 13(13) Sequences: 13(13)
	UDP-glucose:glycoprotein glucosyltransferase 1 isoform X4 [Homo sapiens]
	XP_047301078.1 Mass: 175271 Score: 534 Matches: 13(13) Sequences: 13(13)
	UDP-glucose:glycoprotein glucosyltransferase 1 isoform X5 [Homo sapiens]
	XP_047301079.1 Mass: 161304 Score: 534 Matches: 13(13) Sequences: 13(13)
	UDP-glucose:glycoprotein glucosyltransferase 1 isoform X6 [Homo sapiens]
	XP_047301080.1 Mass: 160392 Score: 534 Matches: 13(13) Sequences: 13(13)
	UDP-glucose:glycoprotein glucosyltransferase 1 isoform X7 [Homo sapiens]
13.	NP_000170.1 Mass: 152689 Score: 525 Matches: 16(16) Sequences: 15(15) emPAI: 0.35
	DNA mismatch repair protein Msh6 isoform 1 [Homo sapiens]
	Query	Observed	Mr(expt)	Mr(calc)	ppm	Miss	Score	Expect	Rank	Unique	Peptide
	4564	362.2053	722.3961	722.3963	-0.27	0	31	0.0058	1	U	R.SGAIFTK.A
	4589	365.2288	728.4431	728.4432	-0.20	0	31	0.019	1	U	K.TGLITPK.A
	5362	435.7557	869.4969	869.4970	-0.13	1	48	0.0016	1	U	K.KLPDLER.L
	5498	451.7324	901.4502	901.4505	-0.35	0	45	0.011	1	U	K.SPALSDANK.A
	5659	470.2428	938.4711	938.4709	0.22	0	48	0.0027	1	U	R.YSDSLVQK.G
	6022	515.3137	1028.6128	1028.6117	1.00	0	47	0.0045	1	U	K.ISEVVELLK.K
	6118	526.2672	1050.5199	1050.5193	0.54	0	69	2.5e-005	1	U	K.QATSISSETK.N
	6133	528.7698	1055.5250	1055.5247	0.26	0	41	0.017	1	U	R.STVDAEAVHK.L
	6134	352.8494	1055.5265	1055.5247	1.64	0	(38)	0.03	1	U	R.STVDAEAVHK.L
	6411	571.8126	1141.6107	1141.6091	1.40	0	54	0.0011	1	U	K.LANLINAEER.R
	6587	602.3221	1202.6296	1202.6295	0.06	0	63	0.00018	1	U	R.FPDLTVELNR.W
	6640	616.2909	1230.5672	1230.5670	0.22	0	61	0.00011	1	U	K.FFIGQFSDDR.H
	6704	627.3589	1252.7032	1252.7027	0.45	0	66	4.2e-005	1	U	R.LANLPEEVIQK.G
	6889	676.8773	1351.7400	1351.7387	0.91	0	77	4.1e-006	1	U	K.IIDFLSALEGFK.V
	7055	483.2372	1446.6899	1446.6892	0.47	0	48	0.0041	1	U	R.VHVQFFDDSPTR.G
	7370	987.9515	1973.8884	1973.8854	1.51	0	93	7.4e-008	1	U	K.GTQTYSVLEGDPSENYSK.Y
	Proteins matching the same set of peptides:
	BAA23674.1 Mass: 153214 Score: 525 Matches: 16(16) Sequences: 15(15)
	GTBP-N [Homo sapiens]
	AAB47425.1 Mass: 152761 Score: 525 Matches: 16(16) Sequences: 15(15)
	bacterial MutS homolog [Homo sapiens]
	AAL87401.1 Mass: 152434 Score: 525 Matches: 16(16) Sequences: 15(15)
	mutS homolog 6 (E. coli) [Homo sapiens]
	NP_001393724.1 Mass: 156389 Score: 525 Matches: 16(16) Sequences: 15(15)
	DNA mismatch repair protein Msh6 isoform 4 [Homo sapiens]
	NP_001393727.1 Mass: 146279 Score: 525 Matches: 16(16) Sequences: 15(15)
	DNA mismatch repair protein Msh6 isoform 10 [Homo sapiens]
	NP_001393742.1 Mass: 152904 Score: 525 Matches: 16(16) Sequences: 15(15)
	DNA mismatch repair protein Msh6 isoform 5 [Homo sapiens]
14.	AAI13615.1 Mass: 168455 Score: 497 Matches: 11(11) Sequences: 11(11) emPAI: 0.22
	Gem (nuclear organelle) associated protein 5 [Homo sapiens]
	Query	Observed	Mr(expt)	Mr(calc)	ppm	Miss	Score	Expect	Rank	Unique	Peptide
	5060	411.2476	820.4806	820.4807	-0.09	0	32	0.044	1	U	R.TSVFLVR.V
	6286	547.2858	1092.5570	1092.5451	10.9	0	48	0.0038	1	U	K.LSGEAFDINK.L
	6494	582.2880	1162.5615	1162.5618	-0.29	0	59	0.00038	1	U	K.YPSATNNTPAK.Q
	6605	403.8907	1208.6502	1208.6513	-0.91	0	52	0.0013	1	U	R.VIGELVGHTER.V
	6896	452.5615	1354.6626	1354.6629	-0.29	0	42	0.016	1	U	R.NDSQHLFIEPR.T
	6919	456.9015	1367.6826	1367.6834	-0.53	0	50	0.011	1	U	K.LGDHQSPATPAFK.S
	7016	713.3599	1424.7053	1424.7048	0.31	0	73	1.3e-005	1	U	R.VGPGAGESPGTPPFR.V
	7156	752.8421	1503.6696	1503.6689	0.52	0	66	3.7e-005	1	U	R.ELNEDVSADVEER.F
	7219	775.3831	1548.7516	1548.7494	1.40	0	61	0.00041	1	U	R.EPVICTPVSSGFEK.S
	7384	1003.0112	2004.0079	2004.0051	1.38	0	131	3.3e-011	1	U	K.TVIESSPESPVTITEPYR.T
	7437	714.6563	2140.9469	2140.9450	0.89	0	64	7.9e-005	1	U	K.SSSSYHTWNTGTEGPFVER.V
	Proteins matching the same set of peptides:
	AAI43725.1 Mass: 168326 Score: 497 Matches: 11(11) Sequences: 11(11)
	GEMIN5 protein [Homo sapiens]
	NP_056280.2 Mass: 168483 Score: 497 Matches: 11(11) Sequences: 11(11)
	gem-associated protein 5 isoform 1 [Homo sapiens]
	NP_001239085.1 Mass: 168354 Score: 497 Matches: 11(11) Sequences: 11(11)
	gem-associated protein 5 isoform 2 [Homo sapiens]
15.	NP_001826.3 Mass: 180181 Score: 434 Matches: 10(10) Sequences: 9(9) emPAI: 0.17
	clathrin heavy chain 2 isoform 2 [Homo sapiens]
	Query	Observed	Mr(expt)	Mr(calc)	ppm	Miss	Score	Expect	Rank	Unique	Peptide
	6196	535.2761	1068.5377	1068.5386	-0.84	0	38	0.031	1		R.AHIAQLCEK.A
	6703	626.8342	1251.6538	1251.6533	0.40	0	40	0.032	1		K.TLQIFNIEMK.S
	6894	677.4274	1352.8402	1352.8391	0.81	0	43	0.0017	1		R.NLQNLLILTAIK.A
	6946	694.3714	1386.7282	1386.7289	-0.49	0	92	2.2e-007	1	U	R.QNLQLCVQVASK.Y
	6953	696.3407	1390.6668	1390.6650	1.34	0	64	0.00011	1		K.LECSEELGDLVK.T
	6993	472.5812	1414.7219	1414.7205	1.00	0	(65)	8.3e-005	1		K.IVLDNSVFSEHR.N
	6994	708.3682	1414.7219	1414.7205	1.01	0	87	5.2e-007	1		K.IVLDNSVFSEHR.N
	7115	740.4042	1478.7938	1478.7922	1.08	0	55	0.00085	1		K.VGYTPDWIFLLR.G
	7127	496.2453	1485.7142	1485.7147	-0.34	1	46	0.0069	1		K.RDPHLACVAYER.G
	7233	778.4301	1554.8455	1554.8440	1.02	0	79	2.6e-006	1		K.LTDQLPLIIVCDR.F
	Proteins matching the same set of peptides:
	NP_009029.3 Mass: 186910 Score: 434 Matches: 10(10) Sequences: 9(9)
	clathrin heavy chain 2 isoform 1 [Homo sapiens]
	AAB40908.1 Mass: 185230 Score: 434 Matches: 10(10) Sequences: 9(9)
	clathrin heavy chain 2 [Homo sapiens]
	AAB40909.1 Mass: 178501 Score: 434 Matches: 10(10) Sequences: 9(9)
	clathrin heavy chain 2 [Homo sapiens]
	AAC50494.1 Mass: 186989 Score: 434 Matches: 10(10) Sequences: 9(9)
	muscle clathrin heavy chain [Homo sapiens]
	AAI66681.1 Mass: 186883 Score: 434 Matches: 10(10) Sequences: 9(9)
	Clathrin, heavy chain-like 1 [synthetic construct]
	KAI4001834.1 Mass: 186878 Score: 434 Matches: 10(10) Sequences: 9(9)
	clathrin heavy chain like 1 [Homo sapiens]
	KAI4001835.1 Mass: 180149 Score: 434 Matches: 10(10) Sequences: 9(9)
	clathrin heavy chain like 1 [Homo sapiens]
	XP_016884442.1 Mass: 185904 Score: 434 Matches: 10(10) Sequences: 9(9)
	clathrin heavy chain 2 isoform X1 [Homo sapiens]
	XP_016884443.1 Mass: 182780 Score: 434 Matches: 10(10) Sequences: 9(9)
	clathrin heavy chain 2 isoform X2 [Homo sapiens]
	XP_016884444.1 Mass: 178662 Score: 434 Matches: 10(10) Sequences: 9(9)
	clathrin heavy chain 2 isoform X6 [Homo sapiens]
	XP_016884445.1 Mass: 175966 Score: 434 Matches: 10(10) Sequences: 9(9)
	clathrin heavy chain 2 isoform X7 [Homo sapiens]
	XP_016884446.1 Mass: 131333 Score: 434 Matches: 10(10) Sequences: 9(9)
	clathrin heavy chain 2 isoform X17 [Homo sapiens]
	XP_047297467.1 Mass: 180626 Score: 434 Matches: 10(10) Sequences: 9(9)
	clathrin heavy chain 2 isoform X3 [Homo sapiens]
	XP_047297468.1 Mass: 179174 Score: 434 Matches: 10(10) Sequences: 9(9)
	clathrin heavy chain 2 isoform X4 [Homo sapiens]
	XP_047297469.1 Mass: 179619 Score: 434 Matches: 10(10) Sequences: 9(9)
	clathrin heavy chain 2 isoform X5 [Homo sapiens]
	XP_047297471.1 Mass: 176051 Score: 434 Matches: 10(10) Sequences: 9(9)
	clathrin heavy chain 2 isoform X9 [Homo sapiens]
	XP_047297472.1 Mass: 173897 Score: 434 Matches: 10(10) Sequences: 9(9)
	clathrin heavy chain 2 isoform X10 [Homo sapiens]
	XP_047297473.1 Mass: 171836 Score: 434 Matches: 10(10) Sequences: 9(9)
	clathrin heavy chain 2 isoform X11 [Homo sapiens]
	XP_047297474.1 Mass: 169681 Score: 434 Matches: 10(10) Sequences: 9(9)
	clathrin heavy chain 2 isoform X12 [Homo sapiens]
	XP_047297475.1 Mass: 166551 Score: 434 Matches: 10(10) Sequences: 9(9)
	clathrin heavy chain 2 isoform X13 [Homo sapiens]
	XP_047297476.1 Mass: 160267 Score: 434 Matches: 10(10) Sequences: 9(9)
	clathrin heavy chain 2 isoform X14 [Homo sapiens]
	XP_047297477.1 Mass: 142367 Score: 434 Matches: 10(10) Sequences: 9(9)
	clathrin heavy chain 2 isoform X15 [Homo sapiens]
	XP_047297478.1 Mass: 139153 Score: 434 Matches: 10(10) Sequences: 9(9)
	clathrin heavy chain 2 isoform X16 [Homo sapiens]
16.	AAA59553.1 Mass: 121105 Score: 423 Matches: 10(10) Sequences: 10(10) emPAI: 0.29
	microtubule-associated protein 4 [Homo sapiens]
	Query	Observed	Mr(expt)	Mr(calc)	ppm	Miss	Score	Expect	Rank	Unique	Peptide
	4587	365.2105	728.4065	728.4068	-0.50	0	32	0.029	1	U	K.TEAPLAK.D
	4602	366.2183	730.4220	730.4225	-0.63	0	43	0.0024	1	U	K.TEVALAK.D
	5673	472.2639	942.5133	942.5134	-0.15	0	56	0.00061	1	U	K.TAGPIASAQK.Q
	6379	565.8058	1129.5970	1129.5979	-0.76	0	76	8.4e-006	1	U	R.LATNTSAPDLK.N
	6449	578.3407	1154.6668	1154.6659	0.81	0	49	0.002	1	U	K.TKPLATTQPAK.T
	6571	598.8356	1195.6567	1195.6561	0.52	0	69	2.2e-005	1	U	K.QPAPTTIGGLNK.K
	6880	673.3703	1344.7260	1344.7249	0.88	0	94	1.4e-007	1	U	K.VALSSETEVALAR.D
	6930	689.3516	1376.6886	1376.6896	-0.73	0	83	1.9e-006	1	U	K.TTTAAAVASTGPSSR.S
	6988	706.8907	1411.7668	1411.7671	-0.19	0	91	1.9e-007	1	U	K.DGVLTLANNVTPAK.D
	7095	734.4071	1466.7996	1466.7981	1.09	0	50	0.0026	1	U	K.NVVLPTETEVAPAK.D
	Proteins matching the same set of peptides:
	AAA67361.1 Mass: 120944 Score: 423 Matches: 10(10) Sequences: 10(10)
	microtubule-associated protein 4 [Homo sapiens]
	BAD92614.1 Mass: 122865 Score: 423 Matches: 10(10) Sequences: 10(10)
	microtubule-associated protein 4 isoform 1 variant, partial [Homo sapiens]
	NP_001127836.1 Mass: 119884 Score: 423 Matches: 10(10) Sequences: 10(10)
	microtubule-associated protein 4 isoform 4 [Homo sapiens]
	NP_001371605.1 Mass: 119326 Score: 423 Matches: 10(10) Sequences: 10(10)
	microtubule-associated protein 4 isoform 23 [Homo sapiens]
	NP_001371608.1 Mass: 121258 Score: 423 Matches: 10(10) Sequences: 10(10)
	microtubule-associated protein 4 isoform 17 [Homo sapiens]
	NP_001371609.1 Mass: 110248 Score: 423 Matches: 10(10) Sequences: 10(10)
	microtubule-associated protein 4 isoform 86 [Homo sapiens]
	NP_001371610.1 Mass: 115698 Score: 423 Matches: 10(10) Sequences: 10(10)
	microtubule-associated protein 4 isoform 56 [Homo sapiens]
	NP_001371658.1 Mass: 120930 Score: 423 Matches: 10(10) Sequences: 10(10)
	microtubule-associated protein 4 isoform 1 [Homo sapiens]
	NP_001371659.1 Mass: 118708 Score: 423 Matches: 10(10) Sequences: 10(10)
	microtubule-associated protein 4 isoform 26 [Homo sapiens]
	NP_001371660.1 Mass: 121244 Score: 423 Matches: 10(10) Sequences: 10(10)
	microtubule-associated protein 4 isoform 16 [Homo sapiens]
	NP_001371665.1 Mass: 122762 Score: 423 Matches: 10(10) Sequences: 10(10)
	microtubule-associated protein 4 isoform 12 [Homo sapiens]
	NP_001371667.1 Mass: 122021 Score: 423 Matches: 10(10) Sequences: 10(10)
	microtubule-associated protein 4 isoform 14 [Homo sapiens]
	NP_001371673.1 Mass: 118490 Score: 423 Matches: 10(10) Sequences: 10(10)
	microtubule-associated protein 4 isoform 30 [Homo sapiens]
	NP_001371674.1 Mass: 123781 Score: 423 Matches: 10(10) Sequences: 10(10)
	microtubule-associated protein 4 isoform 10 [Homo sapiens]
	NP_001371675.1 Mass: 113004 Score: 423 Matches: 10(10) Sequences: 10(10)
	microtubule-associated protein 4 isoform 70 [Homo sapiens]
	NP_001371677.1 Mass: 121935 Score: 423 Matches: 10(10) Sequences: 10(10)
	microtubule-associated protein 4 isoform 15 [Homo sapiens]
	NP_001371683.1 Mass: 117568 Score: 423 Matches: 10(10) Sequences: 10(10)
	microtubule-associated protein 4 isoform 38 [Homo sapiens]
	NP_001371685.1 Mass: 118366 Score: 423 Matches: 10(10) Sequences: 10(10)
	microtubule-associated protein 4 isoform 39 [Homo sapiens]
	NP_001371703.1 Mass: 119412 Score: 423 Matches: 10(10) Sequences: 10(10)
	microtubule-associated protein 4 isoform 22 [Homo sapiens]
	NP_001371705.1 Mass: 114754 Score: 423 Matches: 10(10) Sequences: 10(10)
	microtubule-associated protein 4 isoform [Homo sapiens]
	NP_001371706.1 Mass: 115432 Score: 423 Matches: 10(10) Sequences: 10(10)
	microtubule-associated protein 4 isoform 52 [Homo sapiens]
	NP_001371710.1 Mass: 117654 Score: 423 Matches: 10(10) Sequences: 10(10)
	microtubule-associated protein 4 isoform 36 [Homo sapiens]
	NP_001371711.1 Mass: 117190 Score: 423 Matches: 10(10) Sequences: 10(10)
	microtubule-associated protein 4 isoform 41 [Homo sapiens]
	NP_001371717.1 Mass: 122676 Score: 423 Matches: 10(10) Sequences: 10(10)
	microtubule-associated protein 4 isoform 13 [Homo sapiens]
	NP_001371720.1 Mass: 118576 Score: 423 Matches: 10(10) Sequences: 10(10)
	microtubule-associated protein 4 isoform 28 [Homo sapiens]
	NP_001371724.1 Mass: 123767 Score: 423 Matches: 10(10) Sequences: 10(10)
	microtubule-associated protein 4 isoform 11 [Homo sapiens]
	NP_001371726.1 Mass: 117058 Score: 423 Matches: 10(10) Sequences: 10(10)
	microtubule-associated protein 4 isoform 43 [Homo sapiens]
	NP_001371727.1 Mass: 120844 Score: 423 Matches: 10(10) Sequences: 10(10)
	microtubule-associated protein 4 isoform 18 [Homo sapiens]
	NP_001371745.1 Mass: 118622 Score: 423 Matches: 10(10) Sequences: 10(10)
	microtubule-associated protein 4 isoform 27 [Homo sapiens]
	NP_001371761.1 Mass: 116656 Score: 423 Matches: 10(10) Sequences: 10(10)
	microtubule-associated protein 4 isoform 45 [Homo sapiens]
	NP_001371763.1 Mass: 117834 Score: 423 Matches: 10(10) Sequences: 10(10)
	microtubule-associated protein 4 isoform 35 [Homo sapiens]
	NP_001371765.1 Mass: 116658 Score: 423 Matches: 10(10) Sequences: 10(10)
	microtubule-associated protein 4 isoform 48 [Homo sapiens]
	NP_001371766.1 Mass: 115226 Score: 423 Matches: 10(10) Sequences: 10(10)
	microtubule-associated protein 4 isoform 54 [Homo sapiens]
	NP_001371768.1 Mass: 109595 Score: 423 Matches: 10(10) Sequences: 10(10)
	microtubule-associated protein 4 isoform 89 [Homo sapiens]
	NP_001371772.1 Mass: 112556 Score: 423 Matches: 10(10) Sequences: 10(10)
	microtubule-associated protein 4 isoform 72 [Homo sapiens]
	NP_001371774.1 Mass: 108078 Score: 423 Matches: 10(10) Sequences: 10(10)
	microtubule-associated protein 4 isoform 101 [Homo sapiens]
	NP_001371778.1 Mass: 119743 Score: 423 Matches: 10(10) Sequences: 10(10)
	microtubule-associated protein 4 isoform 21 [Homo sapiens]
	NP_001371793.1 Mass: 114522 Score: 423 Matches: 10(10) Sequences: 10(10)
	microtubule-associated protein 4 isoform 60 [Homo sapiens]
	NP_001371796.1 Mass: 109509 Score: 423 Matches: 10(10) Sequences: 10(10)
	microtubule-associated protein 4 isoform 91 [Homo sapiens]
	NP_001371797.1 Mass: 116744 Score: 423 Matches: 10(10) Sequences: 10(10)
	microtubule-associated protein 4 isoform 46 [Homo sapiens]
	NP_001371802.1 Mass: 117833 Score: 423 Matches: 10(10) Sequences: 10(10)
	microtubule-associated protein 4 isoform 33 [Homo sapiens]
	NP_001371804.1 Mass: 120504 Score: 423 Matches: 10(10) Sequences: 10(10)
	microtubule-associated protein 4 isoform 19 [Homo sapiens]
	NP_001371805.1 Mass: 116742 Score: 423 Matches: 10(10) Sequences: 10(10)
	microtubule-associated protein 4 isoform 42 [Homo sapiens]
	NP_001371808.1 Mass: 119358 Score: 423 Matches: 10(10) Sequences: 10(10)
	microtubule-associated protein 4 isoform 5 [Homo sapiens]
	NP_001371821.1 Mass: 117748 Score: 423 Matches: 10(10) Sequences: 10(10)
	microtubule-associated protein 4 isoform 37 [Homo sapiens]
	KAI2529363.1 Mass: 119898 Score: 423 Matches: 10(10) Sequences: 10(10)
	microtubule associated protein 4 [Homo sapiens]
	XP_016861886.1 Mass: 122249 Score: 423 Matches: 10(10) Sequences: 10(10)
	microtubule-associated protein 4 isoform X21 [Homo sapiens]
	XP_047304086.1 Mass: 123853 Score: 423 Matches: 10(10) Sequences: 10(10)
	microtubule-associated protein 4 isoform X19 [Homo sapiens]
	XP_047304087.1 Mass: 122336 Score: 423 Matches: 10(10) Sequences: 10(10)
	microtubule-associated protein 4 isoform X20 [Homo sapiens]
	XP_047304088.1 Mass: 116972 Score: 423 Matches: 10(10) Sequences: 10(10)
	microtubule-associated protein 4 isoform X22 [Homo sapiens]
	XP_047304089.1 Mass: 115140 Score: 423 Matches: 10(10) Sequences: 10(10)
	microtubule-associated protein 4 isoform X23 [Homo sapiens]
	NP_001372611.1 Mass: 245220 Score: 423 Matches: 10(10) Sequences: 10(10)
	microtubule-associated protein 4 isoform 6 [Homo sapiens]
	NP_001372616.1 Mass: 245206 Score: 423 Matches: 10(10) Sequences: 10(10)
	microtubule-associated protein 4 isoform 2 [Homo sapiens]
	KAI2529367.1 Mass: 245265 Score: 423 Matches: 10(10) Sequences: 10(10)
	microtubule associated protein 4 [Homo sapiens]
	KAI4029426.1 Mass: 245306 Score: 423 Matches: 10(10) Sequences: 10(10)
	microtubule associated protein 4 [Homo sapiens]
	XP_011532005.1 Mass: 248143 Score: 423 Matches: 10(10) Sequences: 10(10)
	microtubule-associated protein 4 isoform X2 [Homo sapiens]
	XP_011532006.1 Mass: 246712 Score: 423 Matches: 10(10) Sequences: 10(10)
	microtubule-associated protein 4 isoform X4 [Homo sapiens]
	XP_011532007.1 Mass: 246384 Score: 423 Matches: 10(10) Sequences: 10(10)
	microtubule-associated protein 4 isoform X6 [Homo sapiens]
	XP_011532010.1 Mass: 244866 Score: 423 Matches: 10(10) Sequences: 10(10)
	microtubule-associated protein 4 isoform X11 [Homo sapiens]
	XP_016861880.1 Mass: 246626 Score: 423 Matches: 10(10) Sequences: 10(10)
	microtubule-associated protein 4 isoform X5 [Homo sapiens]
	XP_024309291.1 Mass: 248229 Score: 423 Matches: 10(10) Sequences: 10(10)
	microtubule-associated protein 4 isoform X1 [Homo sapiens]
	XP_047304074.1 Mass: 247138 Score: 423 Matches: 10(10) Sequences: 10(10)
	microtubule-associated protein 4 isoform X3 [Homo sapiens]
	XP_047304075.1 Mass: 246397 Score: 423 Matches: 10(10) Sequences: 10(10)
	microtubule-associated protein 4 isoform X7 [Homo sapiens]
	XP_047304076.1 Mass: 246297 Score: 423 Matches: 10(10) Sequences: 10(10)
	microtubule-associated protein 4 isoform X8 [Homo sapiens]
	XP_047304077.1 Mass: 245292 Score: 423 Matches: 10(10) Sequences: 10(10)
	microtubule-associated protein 4 isoform X9 [Homo sapiens]
	XP_047304079.1 Mass: 244780 Score: 423 Matches: 10(10) Sequences: 10(10)
	microtubule-associated protein 4 isoform X12 [Homo sapiens]
	XP_047304080.1 Mass: 244043 Score: 423 Matches: 10(10) Sequences: 10(10)
	microtubule-associated protein 4 isoform X13 [Homo sapiens]
	XP_047304081.1 Mass: 243460 Score: 423 Matches: 10(10) Sequences: 10(10)
	microtubule-associated protein 4 isoform X14 [Homo sapiens]
17.	BAF85234.1 Mass: 132207 Score: 316 Matches: 10(10) Sequences: 10(10) emPAI: 0.26
	unnamed protein product [Homo sapiens]
	Query	Observed	Mr(expt)	Mr(calc)	ppm	Miss	Score	Expect	Rank	Unique	Peptide
	4824	389.1906	776.3666	776.3664	0.22	0	57	0.00025	1	U	K.SGTEDLR.T
	5682	473.7296	945.4445	945.4443	0.22	0	37	0.032	1	U	K.YLYADSSK.T
	6231	539.7748	1077.5350	1077.5342	0.74	0	42	0.019	1	U	K.LNFLDEAEK.D
	6365	563.2889	1124.5632	1124.5615	1.55	0	50	0.0025	1	U	K.ITNFTTSWR.N
	6676	624.2790	1246.5435	1246.5426	0.79	0	64	8.3e-005	1	U	R.QLSDQQDEER.R
	6775	645.3387	1288.6628	1288.6623	0.40	0	72	2.2e-005	1	U	K.TGVLNENTVSAGK.D
	6860	665.8654	1329.7162	1329.7140	1.65	0	58	0.00056	1	U	K.LQTLDIGSNLEK.E
	6944	462.2039	1383.5899	1383.5902	-0.20	0	39	0.0084	1	U	K.QAEEEDEHLER.T
	7314	618.6164	1852.8273	1852.8268	0.31	1	42	0.0085	1	U	R.KTEDSFYNNSYNPFK.E
	7317	934.0007	1865.9869	1865.9847	1.20	0	48	0.0048	1	U	K.LLEVQPQVANSPSSAAQK.A
	Proteins matching the same set of peptides:
	NP_001136086.1 Mass: 136154 Score: 316 Matches: 10(10) Sequences: 10(10)
	EH domain-binding protein 1 isoform 2 [Homo sapiens]
	NP_001136087.1 Mass: 132241 Score: 316 Matches: 10(10) Sequences: 10(10)
	EH domain-binding protein 1 isoform 3 [Homo sapiens]
	NP_001341141.1 Mass: 139931 Score: 316 Matches: 10(10) Sequences: 10(10)
	EH domain-binding protein 1 isoform 1 [Homo sapiens]
	NP_001341146.1 Mass: 136019 Score: 316 Matches: 10(10) Sequences: 10(10)
	EH domain-binding protein 1 isoform 5 [Homo sapiens]
	KAI2523579.1 Mass: 139904 Score: 316 Matches: 10(10) Sequences: 10(10)
	EH domain binding protein 1 [Homo sapiens]
	KAI2523580.1 Mass: 136126 Score: 316 Matches: 10(10) Sequences: 10(10)
	EH domain binding protein 1 [Homo sapiens]
	KAI2523581.1 Mass: 132214 Score: 316 Matches: 10(10) Sequences: 10(10)
	EH domain binding protein 1 [Homo sapiens]
	XP_011531020.1 Mass: 125916 Score: 316 Matches: 10(10) Sequences: 10(10)
	EH domain-binding protein 1 isoform X8 [Homo sapiens]
18.	NP_001269588.1 Mass: 154600 Score: 287 Matches: 8(8) Sequences: 8(8) emPAI: 0.17
	ubiquitin carboxyl-terminal hydrolase 47 isoform a [Homo sapiens]
	Query	Observed	Mr(expt)	Mr(calc)	ppm	Miss	Score	Expect	Rank	Unique	Peptide
	6113	524.8238	1047.6331	1047.6328	0.31	0	44	0.0028	1	U	R.LFVLLQTSK.K
	6470	579.2748	1156.5351	1156.5360	-0.74	0	50	0.0014	1	U	K.EIENAAEEPR.V
	6758	641.3807	1280.7468	1280.7452	1.24	0	46	0.0022	1	U	R.ITLNLPASTPVR.K
	6836	660.3168	1318.6191	1318.6187	0.31	0	57	0.00045	1	U	R.EQCGLELSIDR.F
	6955	696.3658	1390.7171	1390.7126	3.24	0	45	0.009	1	U	R.VLCIIQDTTNSK.T
	7021	714.8416	1427.6687	1427.6681	0.40	0	53	0.0009	1	U	R.VYASNQEFESVR.L
	7090	733.7766	1465.5387	1465.5376	0.74	0	72	4.6e-007	1	U	K.AGGDSGNVDDDCER.V
	7097	735.3416	1468.6687	1468.6682	0.35	0	43	0.0094	1	U	R.LNETLSSFSDDNK.I
	Proteins matching the same set of peptides:
	NP_001359020.1 Mass: 154471 Score: 287 Matches: 8(8) Sequences: 8(8)
	ubiquitin carboxyl-terminal hydrolase 47 isoform d [Homo sapiens]
	NP_001359021.1 Mass: 154160 Score: 287 Matches: 8(8) Sequences: 8(8)
	ubiquitin carboxyl-terminal hydrolase 47 isoform e [Homo sapiens]
	NP_001359026.1 Mass: 149589 Score: 287 Matches: 8(8) Sequences: 8(8)
	ubiquitin carboxyl-terminal hydrolase 47 isoform i [Homo sapiens]
	NP_001359027.1 Mass: 148878 Score: 287 Matches: 8(8) Sequences: 8(8)
	ubiquitin carboxyl-terminal hydrolase 47 isoform j [Homo sapiens]
	KAI2558782.1 Mass: 154642 Score: 287 Matches: 8(8) Sequences: 8(8)
	ubiquitin specific peptidase 47 [Homo sapiens]
19.	AAL04167.1 Mass: 128406 Score: 279 Matches: 11(11) Sequences: 11(11) emPAI: 0.30
	centaurin delta2 [Homo sapiens]
	Query	Observed	Mr(expt)	Mr(calc)	ppm	Miss	Score	Expect	Rank	Unique	Peptide
	4645	372.7215	743.4285	743.4290	-0.62	0	42	0.011	1	U	K.AGLSLQR.A
	4649	373.2136	744.4127	744.4130	-0.31	0	61	8.1e-005	1	U	R.AGSLELR.G
	5360	435.2259	868.4372	868.4403	-3.51	0	46	0.0035	1	U	R.LDTDHLR.Y
	5707	478.7612	955.5079	955.5087	-0.81	0	37	0.029	1	U	R.AVTPNGEIR.A
	5736	482.2793	962.5441	962.5437	0.44	0	48	0.0038	1	U	K.LYVAVVGDK.V
	5789	490.2643	978.5140	978.5134	0.59	0	38	0.032	1	U	R.TLYIQGER.R
	5846	496.7619	991.5092	991.5087	0.57	0	41	0.022	1	U	K.FEVITNNR.T
	6128	527.8350	1053.6554	1053.6546	0.71	0	59	6.2e-005	1	U	R.LGSVSLIPLR.G
	6297	550.2753	1098.5360	1098.5346	1.29	0	38	0.025	1	U	R.SFDLTTPYR.I
	6986	706.4016	1410.7885	1410.7871	1.04	0	56	0.00043	1	U	K.AFVPPLAEDLLAR.D
	7648	818.7258	2453.1555	2453.1533	0.89	0	38	0.048	1	U	R.VAGTASGTQHAGDFICTVYLEEK.K
	Proteins matching the same set of peptides:
	AAL12169.1 Mass: 136178 Score: 279 Matches: 11(11) Sequences: 11(11)
	ARAP1 [Homo sapiens]
	SPT35674.1 Mass: 135893 Score: 279 Matches: 11(11) Sequences: 11(11)
	ARAP1, partial [Homo sapiens]
	AAI44563.1 Mass: 134621 Score: 279 Matches: 11(11) Sequences: 11(11)
	ARAP1 protein [Homo sapiens]
	NP_056057.2 Mass: 135749 Score: 279 Matches: 11(11) Sequences: 11(11)
	arf-GAP with Rho-GAP domain, ANK repeat and PH domain-containing protein 1 isoform a [Homo sapiens]
	EAW74864.1 Mass: 138887 Score: 279 Matches: 11(11) Sequences: 11(11)
	centaurin, delta 2, isoform CRA_b [Homo sapiens]
	NP_001128662.1 Mass: 127585 Score: 279 Matches: 11(11) Sequences: 11(11)
	arf-GAP with Rho-GAP domain, ANK repeat and PH domain-containing protein 1 isoform d [Homo sapiens]
	NP_001356418.1 Mass: 134552 Score: 279 Matches: 11(11) Sequences: 11(11)
	arf-GAP with Rho-GAP domain, ANK repeat and PH domain-containing protein 1 isoform e [Homo sapiens]
	KAI2561687.1 Mass: 127586 Score: 279 Matches: 11(11) Sequences: 11(11)
	ArfGAP with RhoGAP domain, ankyrin repeat and PH domain 1 [Homo sapiens]
	KAI2561688.1 Mass: 134553 Score: 279 Matches: 11(11) Sequences: 11(11)
	ArfGAP with RhoGAP domain, ankyrin repeat and PH domain 1 [Homo sapiens]
	KAI2561689.1 Mass: 135750 Score: 279 Matches: 11(11) Sequences: 11(11)
	ArfGAP with RhoGAP domain, ankyrin repeat and PH domain 1 [Homo sapiens]
	KAI2561690.1 Mass: 136179 Score: 279 Matches: 11(11) Sequences: 11(11)
	ArfGAP with RhoGAP domain, ankyrin repeat and PH domain 1 [Homo sapiens]
	EAW74863.1 Mass: 163678 Score: 279 Matches: 11(11) Sequences: 11(11)
	centaurin, delta 2, isoform CRA_a [Homo sapiens]
	EAW74866.1 Mass: 163602 Score: 279 Matches: 11(11) Sequences: 11(11)
	centaurin, delta 2, isoform CRA_d [Homo sapiens]
	BAD92710.1 Mass: 164392 Score: 279 Matches: 11(11) Sequences: 11(11)
	centaurin delta 2 isoform a variant, partial [Homo sapiens]
	NP_001035207.1 Mass: 162089 Score: 279 Matches: 11(11) Sequences: 11(11)
	arf-GAP with Rho-GAP domain, ANK repeat and PH domain-containing protein 1 isoform c [Homo sapiens]
	KAI2561685.1 Mass: 160894 Score: 279 Matches: 11(11) Sequences: 11(11)
	ArfGAP with RhoGAP domain, ankyrin repeat and PH domain 1 [Homo sapiens]
	KAI2561686.1 Mass: 162090 Score: 279 Matches: 11(11) Sequences: 11(11)
	ArfGAP with RhoGAP domain, ankyrin repeat and PH domain 1 [Homo sapiens]
	KAI4073004.1 Mass: 160893 Score: 279 Matches: 11(11) Sequences: 11(11)
	ArfGAP with RhoGAP domain, ankyrin repeat and PH domain 1 [Homo sapiens]
20.	NP_000414.2 Mass: 65393 Score: 266 Matches: 8(8) Sequences: 8(8) emPAI: 0.45
	keratin, type II cytoskeletal 2 epidermal [Homo sapiens]
	Query	Observed	Mr(expt)	Mr(calc)	ppm	Miss	Score	Expect	Rank	Unique	Peptide
	5770	487.2689	972.5232	972.5240	-0.83	0	49	0.0043	1		K.IEISELNR.V
	6052	519.2681	1036.5216	1036.5189	2.59	0	39	0.028	1	U	R.YLDGLTAER.T
	6183	533.7623	1065.5101	1065.5090	0.99	1	48	0.0035	1		K.YEDEINKR.T
	6318	554.2753	1106.5360	1106.5356	0.35	0	37	0.046	1		K.AQYEEIAQR.S
	6567	597.3126	1192.6107	1192.6088	1.59	0	50	0.0031	1	U	K.YEELQVTVGR.H
	6603	604.8121	1207.6096	1207.6085	0.93	0	47	0.0051	1	U	R.TAAENDFVTLK.K
	6855	665.3231	1328.6316	1328.6320	-0.35	0	70	3.1e-005	1	U	K.NVQDAIADAEQR.G
	7106	738.3968	1474.7790	1474.7780	0.71	0	78	7e-006	1		R.FLEQQNQVLQTK.W
	Proteins matching the same set of peptides:
	AAB81946.1 Mass: 65825 Score: 266 Matches: 8(8) Sequences: 8(8)
	keratin 2e [Homo sapiens]
	KAI4066109.1 Mass: 65363 Score: 266 Matches: 8(8) Sequences: 8(8)
	keratin 2 [Homo sapiens]
21.	NP_001363793.1 Mass: 213476 Score: 253 Matches: 8(8) Sequences: 8(8) emPAI: 0.12
	plexin-B2 isoform 1 precursor [Homo sapiens]
	Query	Observed	Mr(expt)	Mr(calc)	ppm	Miss	Score	Expect	Rank	Unique	Peptide
	5476	449.1813	896.3481	896.3480	0.10	0	28	0.039	1	U	R.SDCSLCR.A
	6121	526.7762	1051.5378	1051.5372	0.56	0	37	0.045	1	U	R.LVECGSLFK.G
	6241	541.2183	1080.4220	1080.4229	-0.90	0	29	0.033	1	U	R.CAWCGGQSR.C
	6766	642.3148	1282.6150	1282.6153	-0.28	0	59	0.0003	1	U	R.EASPNPEDGIVR.A
	6786	647.8600	1293.7054	1293.7041	1.02	0	49	0.0034	1	U	R.IQPETGPLGGGIR.I
	7272	862.9637	1723.9128	1723.9104	1.37	0	54	0.0011	1	U	K.LQLEQQVATGPALDNK.K
	7387	1006.4572	2010.8997	2010.8962	1.78	0	56	0.00036	1	U	R.LPVQECLSYPTCTQCR.D
	7930	1229.6257	3685.8554	3685.8298	6.95	0	51	0.0034	1	U	R.AQGEVQLTVSPLPALSEEDELLCLFGESPPHPAR.V
	Proteins matching the same set of peptides:
	NP_001363795.1 Mass: 204997 Score: 253 Matches: 8(8) Sequences: 8(8)
	plexin-B2 isoform 3 precursor [Homo sapiens]
	NP_001363812.1 Mass: 204066 Score: 253 Matches: 8(8) Sequences: 8(8)
	plexin-B2 isoform 4 precursor [Homo sapiens]
	NP_001363813.1 Mass: 202274 Score: 253 Matches: 8(8) Sequences: 8(8)
	plexin-B2 isoform 5 precursor [Homo sapiens]
	NP_001363815.1 Mass: 201618 Score: 253 Matches: 8(8) Sequences: 8(8)
	plexin-B2 isoform 7 precursor [Homo sapiens]
	XP_011528984.1 Mass: 211720 Score: 253 Matches: 8(8) Sequences: 8(8)
	plexin-B2 isoform X1 [Homo sapiens]
	XP_047297221.1 Mass: 120630 Score: 253 Matches: 8(8) Sequences: 8(8)
	plexin-B2 isoform X3 [Homo sapiens]
	NP_001363794.1 Mass: 207478 Score: 253 Matches: 8(8) Sequences: 8(8)
	plexin-B2 isoform 2 precursor [Homo sapiens]
22.	AAI36252.1 Mass: 149850 Score: 227 Matches: 7(7) Sequences: 7(7) emPAI: 0.15
	GRB10 interacting GYF protein 2 [Homo sapiens]
	Query	Observed	Mr(expt)	Mr(calc)	ppm	Miss	Score	Expect	Rank	Unique	Peptide
	5401	438.2088	874.4030	874.4032	-0.15	0	41	0.012	1	U	R.EEEELAR.R
	5872	500.7620	999.5094	999.5097	-0.37	0	56	0.00051	1	U	R.QQQQEALR.R
	6127	527.7560	1053.4974	1053.4978	-0.40	0	43	0.012	1	U	R.AYLGDTSEAK.E
	6831	658.3466	1314.6787	1314.6779	0.60	0	66	8.1e-005	1	U	K.SLLEIQQEEAR.Q
	6877	671.8702	1341.7259	1341.7252	0.53	0	71	2.3e-005	1	U	R.ISDQNIIPSVTR.S
	7060	484.2262	1449.6569	1449.6583	-0.99	1	46	0.0036	1	U	K.TEQTEKAEEETR.M
	7291	890.4973	1778.9799	1778.9778	1.21	0	52	0.0012	1	U	R.ALSSGGSITSPPLSPALPK.Y
	Proteins matching the same set of peptides:
	EAW71017.1 Mass: 152177 Score: 227 Matches: 7(7) Sequences: 7(7)
	trinucleotide repeat containing 15, isoform CRA_b [Homo sapiens]
	ACE86512.1 Mass: 149848 Score: 227 Matches: 7(7) Sequences: 7(7)
	GRB10 interacting GYF protein 2 protein, partial [synthetic construct]
	NP_001096616.1 Mass: 149978 Score: 227 Matches: 7(7) Sequences: 7(7)
	GRB10-interacting GYF protein 2 isoform b [Homo sapiens]
	NP_001096617.1 Mass: 152305 Score: 227 Matches: 7(7) Sequences: 7(7)
	GRB10-interacting GYF protein 2 isoform a [Homo sapiens]
	NP_001096618.1 Mass: 149395 Score: 227 Matches: 7(7) Sequences: 7(7)
	GRB10-interacting GYF protein 2 isoform c [Homo sapiens]
	KAI2527467.1 Mass: 152306 Score: 227 Matches: 7(7) Sequences: 7(7)
	GRB10 interacting GYF protein 2 [Homo sapiens]
	KAI2527472.1 Mass: 149267 Score: 227 Matches: 7(7) Sequences: 7(7)
	GRB10 interacting GYF protein 2 [Homo sapiens]
	KAI4038623.1 Mass: 152434 Score: 227 Matches: 7(7) Sequences: 7(7)
	GRB10 interacting GYF protein 2 [Homo sapiens]
23.	NP_000692.2 Mass: 112824 Score: 200 Matches: 5(5) Sequences: 5(5) emPAI: 0.14
	sodium/potassium-transporting ATPase subunit alpha-1 isoform a [Homo sapiens]
	Query	Observed	Mr(expt)	Mr(calc)	ppm	Miss	Score	Expect	Rank	Unique	Peptide
	4641	372.2240	742.4335	742.4337	-0.26	0	52	0.00043	1	U	R.AAEILAR.D
	5018	406.2003	810.3860	810.3872	-1.49	0	41	0.0069	1	U	K.YGTDLSR.G
	6260	544.2994	1086.5843	1086.5856	-1.13	0	55	0.001	1		K.LIIVEGCQR.Q
	6641	616.3298	1230.6451	1230.6456	-0.36	0	78	6.4e-006	1	U	R.AVAGDASESALLK.C
	7175	760.3556	1518.6966	1518.6950	1.05	0	76	4.2e-006	1	U	R.SPDFTNENPLETR.N
	Proteins matching the same set of peptides:
	BAH11971.1 Mass: 112836 Score: 200 Matches: 5(5) Sequences: 5(5)
	unnamed protein product [Homo sapiens]
	BAH12337.1 Mass: 112366 Score: 200 Matches: 5(5) Sequences: 5(5)
	unnamed protein product, partial [Homo sapiens]
	BAG37313.1 Mass: 112797 Score: 200 Matches: 5(5) Sequences: 5(5)
	unnamed protein product [Homo sapiens]
	NP_001153705.1 Mass: 112928 Score: 200 Matches: 5(5) Sequences: 5(5)
	sodium/potassium-transporting ATPase subunit alpha-1 isoform c [Homo sapiens]
	NP_001153706.1 Mass: 109480 Score: 200 Matches: 5(5) Sequences: 5(5)
	sodium/potassium-transporting ATPase subunit alpha-1 isoform d [Homo sapiens]
24.	AAA21833.1 Mass: 131776 Score: 196 Matches: 5(5) Sequences: 5(5) emPAI: 0.12
	autoantigen [Homo sapiens]
	Query	Observed	Mr(expt)	Mr(calc)	ppm	Miss	Score	Expect	Rank	Unique	Peptide
	5670	471.7722	941.5299	941.5294	0.56	0	45	0.0063	1	U	K.ALQDVQIR.F
	6405	570.2927	1138.5708	1138.5731	-2.01	0	43	0.0093	1	U	R.HSQEELLQR.L
	6698	625.7873	1249.5601	1249.5609	-0.56	0	62	9.6e-005	1	U	R.ETCSTLAESPR.N
	7394	676.6789	2027.0148	2027.0106	2.09	0	83	1.6e-006	1	U	R.LCTQLEGLQSTVTGHVER.A
	7795	961.4130	2881.2171	2881.2122	1.68	0	50	0.00086	1	U	R.DSQDASAEQSDHDDEVASLASASGGFGTK.V
	Proteins matching the same set of peptides:
	AAB51444.1 Mass: 103770 Score: 196 Matches: 5(5) Sequences: 5(5)
	autoantigen [Homo sapiens]
	AAH53598.1 Mass: 129644 Score: 196 Matches: 5(5) Sequences: 5(5)
	EDC4 protein, partial [Homo sapiens]
	NP_055144.3 Mass: 151567 Score: 196 Matches: 5(5) Sequences: 5(5)
	enhancer of mRNA-decapping protein 4 [Homo sapiens]
	QTW92174.1 Mass: 155333 Score: 196 Matches: 5(5) Sequences: 5(5)
	EDC4 variant [Homo sapiens]
25.	NP_006507.2 Mass: 54049 Score: 157 Matches: 4(4) Sequences: 3(3) emPAI: 0.18
	solute carrier family 2, facilitated glucose transporter member 1 [Homo sapiens]
	Query	Observed	Mr(expt)	Mr(calc)	ppm	Miss	Score	Expect	Rank	Unique	Peptide
	5836	495.8030	989.5915	989.5910	0.52	0	41	0.0087	1	U	K.VTILELFR.S
	6409	571.7778	1141.5410	1141.5404	0.52	0	64	6.4e-005	1	U	R.TFDEIASGFR.Q
	7359	654.6339	1960.8797	1960.8796	0.05	1	61	0.00012	1	U	R.GTADVTHDLQEMKEESR.Q
	7360	491.2284	1960.8843	1960.8796	2.40	1	(45)	0.0056	1	U	R.GTADVTHDLQEMKEESR.Q
	Proteins matching the same set of peptides:
	AAI21805.1 Mass: 54019 Score: 157 Matches: 4(4) Sequences: 3(3)
	Solute carrier family 2 (facilitated glucose transporter), member 1 [Homo sapiens]
	AAC28635.1 Mass: 37855 Score: 157 Matches: 4(4) Sequences: 3(3)
	glucose transporter glycoprotein, partial [Homo sapiens]
	AAA52571.1 Mass: 54083 Score: 157 Matches: 4(4) Sequences: 3(3)
	glucose transporter glycoprotein [Homo sapiens]
	BAG53842.1 Mass: 45839 Score: 157 Matches: 4(4) Sequences: 3(3)
	unnamed protein product [Homo sapiens]
	BAG59323.1 Mass: 47789 Score: 157 Matches: 4(4) Sequences: 3(3)
	unnamed protein product [Homo sapiens]
	BAF85480.1 Mass: 53799 Score: 157 Matches: 4(4) Sequences: 3(3)
	unnamed protein product [Homo sapiens]
	BAD92224.1 Mass: 56981 Score: 157 Matches: 4(4) Sequences: 3(3)
	solute carrier family 2 (facilitated glucose transporter), member 1 variant, partial [Homo sapiens]
26.	AAI06030.1 Mass: 86022 Score: 156 Matches: 2(2) Sequences: 2(2) emPAI: 0.07
	USP19 protein, partial [Homo sapiens]
	Query	Observed	Mr(expt)	Mr(calc)	ppm	Miss	Score	Expect	Rank	Unique	Peptide
	6699	625.7966	1249.5787	1249.5786	0.06	0	74	8.4e-006	1	U	R.SEDTGLDSVATR.T
	7117	741.3707	1480.7269	1480.7270	-0.08	0	100	2.8e-008	1	U	R.GEVGAGAGPGAQAGPSAK.R
	Proteins matching the same set of peptides:
	AAI42661.1 Mass: 158627 Score: 156 Matches: 2(2) Sequences: 2(2)
	USP19 protein, partial [Homo sapiens]
	AAI42728.1 Mass: 158875 Score: 156 Matches: 2(2) Sequences: 2(2)
	USP19 protein, partial [Homo sapiens]
	BAG57894.1 Mass: 155953 Score: 156 Matches: 2(2) Sequences: 2(2)
	unnamed protein product [Homo sapiens]
	BAG62152.1 Mass: 150493 Score: 156 Matches: 2(2) Sequences: 2(2)
	unnamed protein product [Homo sapiens]
	NP_001186089.1 Mass: 155937 Score: 156 Matches: 2(2) Sequences: 2(2)
	ubiquitin carboxyl-terminal hydrolase 19 isoform 1 [Homo sapiens]
	NP_001186090.1 Mass: 151830 Score: 156 Matches: 2(2) Sequences: 2(2)
	ubiquitin carboxyl-terminal hydrolase 19 isoform 2 [Homo sapiens]
	NP_001186091.1 Mass: 150565 Score: 156 Matches: 2(2) Sequences: 2(2)
	ubiquitin carboxyl-terminal hydrolase 19 isoform 3 [Homo sapiens]
	NP_001338027.1 Mass: 150498 Score: 156 Matches: 2(2) Sequences: 2(2)
	ubiquitin carboxyl-terminal hydrolase 19 isoform 5 [Homo sapiens]
	NP_001338028.1 Mass: 151574 Score: 156 Matches: 2(2) Sequences: 2(2)
	ubiquitin carboxyl-terminal hydrolase 19 isoform 6 [Homo sapiens]
	NP_001338029.1 Mass: 155937 Score: 156 Matches: 2(2) Sequences: 2(2)
	ubiquitin carboxyl-terminal hydrolase 19 isoform 7 [Homo sapiens]
	NP_001338030.1 Mass: 151887 Score: 156 Matches: 2(2) Sequences: 2(2)
	ubiquitin carboxyl-terminal hydrolase 19 isoform 8 [Homo sapiens]
	NP_001338036.1 Mass: 150313 Score: 156 Matches: 2(2) Sequences: 2(2)
	ubiquitin carboxyl-terminal hydrolase 19 isoform 14 [Homo sapiens]
	NP_001376523.1 Mass: 156066 Score: 156 Matches: 2(2) Sequences: 2(2)
	ubiquitin carboxyl-terminal hydrolase 19 isoform 16 [Homo sapiens]
	NP_001376524.1 Mass: 156123 Score: 156 Matches: 2(2) Sequences: 2(2)
	ubiquitin carboxyl-terminal hydrolase 19 isoform 17 [Homo sapiens]
	NP_001376525.1 Mass: 152015 Score: 156 Matches: 2(2) Sequences: 2(2)
	ubiquitin carboxyl-terminal hydrolase 19 isoform 18 [Homo sapiens]
	NP_001376527.1 Mass: 151702 Score: 156 Matches: 2(2) Sequences: 2(2)
	ubiquitin carboxyl-terminal hydrolase 19 isoform 20 [Homo sapiens]
	NP_001376528.1 Mass: 150184 Score: 156 Matches: 2(2) Sequences: 2(2)
	ubiquitin carboxyl-terminal hydrolase 19 isoform 21 [Homo sapiens]
	NP_001376529.1 Mass: 150185 Score: 156 Matches: 2(2) Sequences: 2(2)
	ubiquitin carboxyl-terminal hydrolase 19 isoform 22 [Homo sapiens]
	NP_001376530.1 Mass: 154420 Score: 156 Matches: 2(2) Sequences: 2(2)
	ubiquitin carboxyl-terminal hydrolase 19 isoform 23 [Homo sapiens]
	NP_001376531.1 Mass: 155809 Score: 156 Matches: 2(2) Sequences: 2(2)
	ubiquitin carboxyl-terminal hydrolase 19 isoform 24 [Homo sapiens]
	NP_001376532.1 Mass: 154548 Score: 156 Matches: 2(2) Sequences: 2(2)
	ubiquitin carboxyl-terminal hydrolase 19 isoform 25 [Homo sapiens]
	NP_001376533.1 Mass: 151702 Score: 156 Matches: 2(2) Sequences: 2(2)
	ubiquitin carboxyl-terminal hydrolase 19 isoform 26 [Homo sapiens]
	NP_001387219.1 Mass: 151887 Score: 156 Matches: 2(2) Sequences: 2(2)
	ubiquitin carboxyl-terminal hydrolase 19 isoform 36 [Homo sapiens]
	NP_001387223.1 Mass: 151321 Score: 156 Matches: 2(2) Sequences: 2(2)
	ubiquitin carboxyl-terminal hydrolase 19 isoform 31 [Homo sapiens]
	NP_001387224.1 Mass: 150370 Score: 156 Matches: 2(2) Sequences: 2(2)
	ubiquitin carboxyl-terminal hydrolase 19 isoform 32 [Homo sapiens]
	NP_001387225.1 Mass: 150370 Score: 156 Matches: 2(2) Sequences: 2(2)
	ubiquitin carboxyl-terminal hydrolase 19 isoform 33 [Homo sapiens]
	NP_001387227.1 Mass: 150056 Score: 156 Matches: 2(2) Sequences: 2(2)
	ubiquitin carboxyl-terminal hydrolase 19 isoform 34 [Homo sapiens]
	NP_001387228.1 Mass: 149175 Score: 156 Matches: 2(2) Sequences: 2(2)
	ubiquitin carboxyl-terminal hydrolase 19 isoform 35 [Homo sapiens]
	KAI2529577.1 Mass: 60689 Score: 156 Matches: 2(2) Sequences: 2(2)
	ubiquitin specific peptidase 19, partial [Homo sapiens]
	XP_005264880.1 Mass: 156251 Score: 156 Matches: 2(2) Sequences: 2(2)
	ubiquitin carboxyl-terminal hydrolase 19 isoform X1 [Homo sapiens]
	XP_005264884.1 Mass: 154733 Score: 156 Matches: 2(2) Sequences: 2(2)
	ubiquitin carboxyl-terminal hydrolase 19 isoform X4 [Homo sapiens]
	XP_006713009.1 Mass: 156123 Score: 156 Matches: 2(2) Sequences: 2(2)
	ubiquitin carboxyl-terminal hydrolase 19 isoform X2 [Homo sapiens]
	XP_006713010.1 Mass: 154420 Score: 156 Matches: 2(2) Sequences: 2(2)
	ubiquitin carboxyl-terminal hydrolase 19 isoform X7 [Homo sapiens]
	XP_047303297.1 Mass: 155994 Score: 156 Matches: 2(2) Sequences: 2(2)
	ubiquitin carboxyl-terminal hydrolase 19 isoform X3 [Homo sapiens]
	XP_047303298.1 Mass: 154605 Score: 156 Matches: 2(2) Sequences: 2(2)
	ubiquitin carboxyl-terminal hydrolase 19 isoform X5 [Homo sapiens]
	XP_047303299.1 Mass: 154605 Score: 156 Matches: 2(2) Sequences: 2(2)
	ubiquitin carboxyl-terminal hydrolase 19 isoform X6 [Homo sapiens]
	XP_047303300.1 Mass: 154477 Score: 156 Matches: 2(2) Sequences: 2(2)
	ubiquitin carboxyl-terminal hydrolase 19 isoform X8 [Homo sapiens]
	XP_047303301.1 Mass: 154292 Score: 156 Matches: 2(2) Sequences: 2(2)
	ubiquitin carboxyl-terminal hydrolase 19 isoform X9 [Homo sapiens]
	XP_047303302.1 Mass: 151759 Score: 156 Matches: 2(2) Sequences: 2(2)
	ubiquitin carboxyl-terminal hydrolase 19 isoform X10 [Homo sapiens]
	XP_047303303.1 Mass: 150242 Score: 156 Matches: 2(2) Sequences: 2(2)
	ubiquitin carboxyl-terminal hydrolase 19 isoform X11 [Homo sapiens]
27.	NP_004944.3 Mass: 154837 Score: 155 Matches: 5(5) Sequences: 4(4) emPAI: 0.08
	eukaryotic translation initiation factor 4 gamma 1 isoform 4 [Homo sapiens]
	Query	Observed	Mr(expt)	Mr(calc)	ppm	Miss	Score	Expect	Rank	Unique	Peptide
	6342	372.8674	1115.5805	1115.5822	-1.56	1	45	0.0099	1	U	R.LKEELEEAR.D
	6343	558.7985	1115.5824	1115.5822	0.15	1	(43)	0.016	1	U	R.LKEELEEAR.D
	6530	589.3089	1176.6032	1176.6026	0.51	0	49	0.0038	1	U	K.EAVGDLLDAFK.E
	6661	620.2722	1238.5298	1238.5303	-0.41	1	41	0.009	1	U	K.DKDDDEVFEK.K
	6973	701.8626	1401.7105	1401.7100	0.42	0	82	2e-006	1	U	K.QVTQLAIDTEER.L
	Proteins matching the same set of peptides:
	AAI40893.1 Mass: 176066 Score: 155 Matches: 5(5) Sequences: 4(4)
	EIF4G1 protein [Homo sapiens]
	AAI40897.1 Mass: 176098 Score: 155 Matches: 5(5) Sequences: 4(4)
	EIF4G1 protein [Homo sapiens]
	CAI46013.1 Mass: 175412 Score: 155 Matches: 5(5) Sequences: 4(4)
	hypothetical protein [Homo sapiens]
	BAG57762.1 Mass: 172053 Score: 155 Matches: 5(5) Sequences: 4(4)
	unnamed protein product [Homo sapiens]
	BAG61651.1 Mass: 166479 Score: 155 Matches: 5(5) Sequences: 4(4)
	unnamed protein product [Homo sapiens]
	EAW78259.1 Mass: 175510 Score: 155 Matches: 5(5) Sequences: 4(4)
	eukaryotic translation initiation factor 4 gamma, 1, isoform CRA_c [Homo sapiens]
	EAW78261.1 Mass: 145450 Score: 155 Matches: 5(5) Sequences: 4(4)
	eukaryotic translation initiation factor 4 gamma, 1, isoform CRA_e [Homo sapiens]
	EAW78268.1 Mass: 123984 Score: 155 Matches: 5(5) Sequences: 4(4)
	eukaryotic translation initiation factor 4 gamma, 1, isoform CRA_h [Homo sapiens]
	AAC82471.1 Mass: 171457 Score: 155 Matches: 5(5) Sequences: 4(4)
	eukaryotic protein synthesis initiation factor [Homo sapiens]
	AAL92872.1 Mass: 175426 Score: 155 Matches: 5(5) Sequences: 4(4)
	eukaryotic translation initiation factor 4GI [Homo sapiens]
	NP_886553.3 Mass: 175480 Score: 155 Matches: 5(5) Sequences: 4(4)
	eukaryotic translation initiation factor 4 gamma 1 isoform 1 [Homo sapiens]
	NP_937884.2 Mass: 175382 Score: 155 Matches: 5(5) Sequences: 4(4)
	eukaryotic translation initiation factor 4 gamma 1 isoform 5 [Homo sapiens]
	NP_937885.1 Mass: 158419 Score: 155 Matches: 5(5) Sequences: 4(4)
	eukaryotic translation initiation factor 4 gamma 1 isoform 3 [Homo sapiens]
	NP_937887.2 Mass: 166516 Score: 155 Matches: 5(5) Sequences: 4(4)
	eukaryotic translation initiation factor 4 gamma 1 isoform 2 [Homo sapiens]
	NP_001181875.2 Mass: 176128 Score: 155 Matches: 5(5) Sequences: 4(4)
	eukaryotic translation initiation factor 4 gamma 1 isoform 6 [Homo sapiens]
	NP_001278086.2 Mass: 171407 Score: 155 Matches: 5(5) Sequences: 4(4)
	eukaryotic translation initiation factor 4 gamma 1 isoform 7 [Homo sapiens]
	KAI2532749.1 Mass: 175448 Score: 155 Matches: 5(5) Sequences: 4(4)
	eukaryotic translation initiation factor 4 gamma 1 [Homo sapiens]
	KAI2532750.1 Mass: 175320 Score: 155 Matches: 5(5) Sequences: 4(4)
	eukaryotic translation initiation factor 4 gamma 1 [Homo sapiens]
	KAI2532751.1 Mass: 172938 Score: 155 Matches: 5(5) Sequences: 4(4)
	eukaryotic translation initiation factor 4 gamma 1 [Homo sapiens]
	KAI2532752.1 Mass: 98104 Score: 155 Matches: 5(5) Sequences: 4(4)
	eukaryotic translation initiation factor 4 gamma 1, partial [Homo sapiens]
	KAI2532757.1 Mass: 171473 Score: 155 Matches: 5(5) Sequences: 4(4)
	eukaryotic translation initiation factor 4 gamma 1 [Homo sapiens]
	KAI2532758.1 Mass: 171345 Score: 155 Matches: 5(5) Sequences: 4(4)
	eukaryotic translation initiation factor 4 gamma 1 [Homo sapiens]
	KAI2532761.1 Mass: 166582 Score: 155 Matches: 5(5) Sequences: 4(4)
	eukaryotic translation initiation factor 4 gamma 1 [Homo sapiens]
	KAI2532762.1 Mass: 166454 Score: 155 Matches: 5(5) Sequences: 4(4)
	eukaryotic translation initiation factor 4 gamma 1 [Homo sapiens]
	KAI2532764.1 Mass: 158515 Score: 155 Matches: 5(5) Sequences: 4(4)
	eukaryotic translation initiation factor 4 gamma 1 [Homo sapiens]
	KAI2532765.1 Mass: 158387 Score: 155 Matches: 5(5) Sequences: 4(4)
	eukaryotic translation initiation factor 4 gamma 1 [Homo sapiens]
	KAI2532766.1 Mass: 82412 Score: 155 Matches: 5(5) Sequences: 4(4)
	eukaryotic translation initiation factor 4 gamma 1, partial [Homo sapiens]
	KAI2532768.1 Mass: 154805 Score: 155 Matches: 5(5) Sequences: 4(4)
	eukaryotic translation initiation factor 4 gamma 1 [Homo sapiens]
28.	NP_001035887.1 Mass: 49437 Score: 146 Matches: 3(3) Sequences: 3(3) emPAI: 0.20
	monocarboxylate transporter 4 [Homo sapiens]
	Query	Observed	Mr(expt)	Mr(calc)	ppm	Miss	Score	Expect	Rank	Unique	Peptide
	6549	593.3094	1184.6043	1184.6037	0.51	0	42	0.012	1	U	M.GGAVVDEGPTGVK.A
	6979	468.9243	1403.7511	1403.7521	-0.69	0	73	1.4e-005	1	U	K.LHKPPADSGVDLR.E
	7019	713.8391	1425.6637	1425.6623	0.95	0	65	6.1e-005	1	U	K.EPQPEVAAAEEEK.L
29.	AAL11993.1 Mass: 128326 Score: 140 Matches: 3(3) Sequences: 3(3) emPAI: 0.07
	tumor endothelial marker 6 [Homo sapiens]
	Query	Observed	Mr(expt)	Mr(calc)	ppm	Miss	Score	Expect	Rank	Unique	Peptide
	6015	514.7535	1027.4924	1027.4934	-1.00	0	43	0.0064	1	U	R.LPDTGEGPSR.A
	6141	529.2856	1056.5567	1056.5564	0.36	0	74	7.9e-006	1	U	K.AGDLANELVR.H
	6554	593.7933	1185.5720	1185.5738	-1.53	0	58	0.00034	1	U	R.QGSSAEQPLGGR.L
	Proteins matching the same set of peptides:
	CAH18438.1 Mass: 155141 Score: 140 Matches: 3(3) Sequences: 3(3)
	hypothetical protein [Homo sapiens]
	AAN32667.1 Mass: 155181 Score: 140 Matches: 3(3) Sequences: 3(3)
	tensin 3 [Homo sapiens]
	CAD38705.1 Mass: 95817 Score: 140 Matches: 3(3) Sequences: 3(3)
	hypothetical protein, partial [Homo sapiens]
	EAW61012.1 Mass: 168088 Score: 140 Matches: 3(3) Sequences: 3(3)
	tensin 3, isoform CRA_b, partial [Homo sapiens]
	NP_073585.8 Mass: 155169 Score: 140 Matches: 3(3) Sequences: 3(3)
	tensin-3 [Homo sapiens]
	XP_011513779.1 Mass: 166454 Score: 140 Matches: 3(3) Sequences: 3(3)
	tensin-3 isoform X5 [Homo sapiens]
	XP_011513780.1 Mass: 164795 Score: 140 Matches: 3(3) Sequences: 3(3)
	tensin-3 isoform X9 [Homo sapiens]
	XP_011513781.1 Mass: 159694 Score: 140 Matches: 3(3) Sequences: 3(3)
	tensin-3 isoform X10 [Homo sapiens]
	XP_011513786.1 Mass: 106204 Score: 140 Matches: 3(3) Sequences: 3(3)
	tensin-3 isoform X12 [Homo sapiens]
	XP_016868026.1 Mass: 166467 Score: 140 Matches: 3(3) Sequences: 3(3)
	tensin-3 isoform X2 [Homo sapiens]
	XP_016868027.1 Mass: 167651 Score: 140 Matches: 3(3) Sequences: 3(3)
	tensin-3 isoform X4 [Homo sapiens]
	XP_047276679.1 Mass: 169431 Score: 140 Matches: 3(3) Sequences: 3(3)
	tensin-3 isoform X1 [Homo sapiens]
	XP_047276681.1 Mass: 167888 Score: 140 Matches: 3(3) Sequences: 3(3)
	tensin-3 isoform X3 [Homo sapiens]
	XP_047276682.1 Mass: 166230 Score: 140 Matches: 3(3) Sequences: 3(3)
	tensin-3 isoform X6 [Homo sapiens]
	XP_047276684.1 Mass: 165123 Score: 140 Matches: 3(3) Sequences: 3(3)
	tensin-3 isoform X7 [Homo sapiens]
	XP_047276685.1 Mass: 165034 Score: 140 Matches: 3(3) Sequences: 3(3)
	tensin-3 isoform X8 [Homo sapiens]
30.	NP_000468.1 Mass: 69321 Score: 139 Matches: 4(4) Sequences: 3(3) emPAI: 0.14
	albumin preproprotein [Homo sapiens]
	Query	Observed	Mr(expt)	Mr(calc)	ppm	Miss	Score	Expect	Rank	Unique	Peptide
	4888	395.2388	788.4630	788.4644	-1.75	0	(36)	0.018	1	U	K.LVTDLTK.V
	4889	789.4712	788.4639	788.4644	-0.58	0	45	0.0029	1	U	K.LVTDLTK.V
	6402	569.7526	1137.4907	1137.4907	0.01	0	55	0.00023	1	U	K.CCTESLVNR.R
	7165	756.4256	1510.8366	1510.8355	0.74	0	78	3.5e-006	1	U	K.VPQVSTPTLVEVSR.N
	Proteins matching the same set of peptides:
	AAF01333.1 Mass: 69180 Score: 139 Matches: 4(4) Sequences: 3(3)
	serum albumin precursor [Homo sapiens]
	EAX05666.1 Mass: 68568 Score: 139 Matches: 4(4) Sequences: 3(3)
	albumin, isoform CRA_h [Homo sapiens]
	EAX05669.1 Mass: 47257 Score: 139 Matches: 4(4) Sequences: 3(3)
	albumin, isoform CRA_k [Homo sapiens]
	AAN17825.1 Mass: 69349 Score: 139 Matches: 4(4) Sequences: 3(3)
	serum albumin [Homo sapiens]
	CAH18185.1 Mass: 69357 Score: 139 Matches: 4(4) Sequences: 3(3)
	hypothetical protein [Homo sapiens]
	CAA23754.1 Mass: 69321 Score: 139 Matches: 4(4) Sequences: 3(3)
	serum albumin [Homo sapiens]
	AAG35503.1 Mass: 56745 Score: 139 Matches: 4(4) Sequences: 3(3)
	PRO2619 [Homo sapiens]
	BAG37325.1 Mass: 69348 Score: 139 Matches: 4(4) Sequences: 3(3)
	unnamed protein product [Homo sapiens]
	AAH41789.1 Mass: 47330 Score: 139 Matches: 4(4) Sequences: 3(3)
	ALB protein [Homo sapiens]
	BAG60658.1 Mass: 70317 Score: 139 Matches: 4(4) Sequences: 3(3)
	unnamed protein product [Homo sapiens]
	BAG60674.1 Mass: 59535 Score: 139 Matches: 4(4) Sequences: 3(3)
	unnamed protein product [Homo sapiens]
	AEE60908.1 Mass: 66488 Score: 139 Matches: 4(4) Sequences: 3(3)
	albumin, partial [Homo sapiens]
	BAF85444.1 Mass: 69222 Score: 139 Matches: 4(4) Sequences: 3(3)
	unnamed protein product [Homo sapiens]
	AAA98798.1 Mass: 69181 Score: 139 Matches: 4(4) Sequences: 3(3)
	alloalbumin Venezia [Homo sapiens]
	KAI2534612.1 Mass: 56175 Score: 139 Matches: 4(4) Sequences: 3(3)
	albumin [Homo sapiens]
	KAI2534615.1 Mass: 52025 Score: 139 Matches: 4(4) Sequences: 3(3)
	albumin [Homo sapiens]
31.	NP_001672.1 Mass: 109620 Score: 118 Matches: 3(3) Sequences: 3(3) emPAI: 0.09
	sarcoplasmic/endoplasmic reticulum calcium ATPase 2 isoform a [Homo sapiens]
	Query	Observed	Mr(expt)	Mr(calc)	ppm	Miss	Score	Expect	Rank	Unique	Peptide
	5780	488.7462	975.4779	975.4807	-2.87	0	51	0.0021	1	U	R.ANACNSVIK.Q
	6802	653.3071	1304.5996	1304.5997	-0.06	0	49	0.0023	1	U	R.EFDELNPSAQR.D
	6982	704.8518	1407.6889	1407.6882	0.54	0	54	0.0011	1	U	R.IGIFGQDEDVTSK.A
	Proteins matching the same set of peptides:
	BAG57266.1 Mass: 97720 Score: 118 Matches: 3(3) Sequences: 3(3)
	unnamed protein product [Homo sapiens]
	EAW97902.1 Mass: 100627 Score: 118 Matches: 3(3) Sequences: 3(3)
	ATPase, Ca++ transporting, cardiac muscle, slow twitch 2, isoform CRA_a [Homo sapiens]
	EAW97904.1 Mass: 95565 Score: 118 Matches: 3(3) Sequences: 3(3)
	ATPase, Ca++ transporting, cardiac muscle, slow twitch 2, isoform CRA_c [Homo sapiens]
	NP_733765.1 Mass: 114683 Score: 118 Matches: 3(3) Sequences: 3(3)
	sarcoplasmic/endoplasmic reticulum calcium ATPase 2 isoform b [Homo sapiens]
	XP_005253945.1 Mass: 109822 Score: 118 Matches: 3(3) Sequences: 3(3)
	sarcoplasmic/endoplasmic reticulum calcium ATPase 2 isoform X1 [Homo sapiens]
32.	AAB05994.1 Mass: 80419 Score: 116 Matches: 3(3) Sequences: 3(3) emPAI: 0.12
	putative transmembrane protein precursor [Homo sapiens]
	Query	Observed	Mr(expt)	Mr(calc)	ppm	Miss	Score	Expect	Rank	Unique	Peptide
	5598	463.2427	924.4708	924.4705	0.31	0	39	0.02	1	U	R.IIFDDFR.E
	6309	552.2747	1102.5349	1102.5335	1.27	0	61	0.00028	1	U	R.FLAEEGFYK.F
	7134	746.3236	1490.6327	1490.6314	0.87	0	55	0.00026	1	U	K.ENDYYTPTGEFR.V
	Proteins matching the same set of peptides:
	EAW67643.1 Mass: 80376 Score: 116 Matches: 3(3) Sequences: 3(3)
	hCG2032701, isoform CRA_a [Homo sapiens]
	NP_001127302.1 Mass: 80477 Score: 116 Matches: 3(3) Sequences: 3(3)
	dolichyl-diphosphooligosaccharide--protein glycosyltransferase subunit STT3A [Pongo abelii]
33.	NP_005545.1 Mass: 60008 Score: 114 Matches: 4(4) Sequences: 3(3) emPAI: 0.16
	keratin, type II cytoskeletal 6A [Homo sapiens]
	Query	Observed	Mr(expt)	Mr(calc)	ppm	Miss	Score	Expect	Rank	Unique	Peptide
	6183	533.7623	1065.5101	1065.5090	0.99	1	48	0.0035	1		K.YEDEINKR.T
	6318	554.2753	1106.5360	1106.5356	0.35	0	37	0.046	1		K.AQYEEIAQR.S
	6814	436.8900	1307.6480	1307.6469	0.84	2	47	0.0057	1		K.NKYEDEINKR.T
	6815	654.8317	1307.6489	1307.6469	1.51	2	(38)	0.045	1		K.NKYEDEINKR.T
	Proteins matching the same set of peptides:
	NP_005546.2 Mass: 60030 Score: 114 Matches: 4(4) Sequences: 3(3)
	keratin, type II cytoskeletal 6B [Homo sapiens]
	AAI10640.1 Mass: 59960 Score: 114 Matches: 4(4) Sequences: 3(3)
	Keratin 6C [Homo sapiens]
	CAA24760.1 Mass: 39195 Score: 114 Matches: 4(4) Sequences: 3(3)
	unnamed protein product, partial [Homo sapiens]
	BAG36050.1 Mass: 59990 Score: 114 Matches: 4(4) Sequences: 3(3)
	unnamed protein product [Homo sapiens]
	AAC41768.1 Mass: 59962 Score: 114 Matches: 4(4) Sequences: 3(3)
	keratin type II [Homo sapiens]
	AAC41769.1 Mass: 60163 Score: 114 Matches: 4(4) Sequences: 3(3)
	keratin type II [Homo sapiens]
	AAC41770.1 Mass: 60186 Score: 114 Matches: 4(4) Sequences: 3(3)
	keratin type II [Homo sapiens]
	AAB60696.1 Mass: 42442 Score: 114 Matches: 4(4) Sequences: 3(3)
	keratin type II, partial [Homo sapiens]
	BAG61372.1 Mass: 57803 Score: 114 Matches: 4(4) Sequences: 3(3)
	unnamed protein product [Homo sapiens]
	BAG61408.1 Mass: 58500 Score: 114 Matches: 4(4) Sequences: 3(3)
	unnamed protein product [Homo sapiens]
	BAG63158.1 Mass: 55765 Score: 114 Matches: 4(4) Sequences: 3(3)
	unnamed protein product [Homo sapiens]
	AAH69269.1 Mass: 60038 Score: 114 Matches: 4(4) Sequences: 3(3)
	Keratin 6A [Homo sapiens]
	BAF82934.1 Mass: 59994 Score: 114 Matches: 4(4) Sequences: 3(3)
	unnamed protein product [Homo sapiens]
	EAW96626.1 Mass: 59874 Score: 114 Matches: 4(4) Sequences: 3(3)
	keratin 6B, isoform CRA_a [Homo sapiens]
	EAW96627.1 Mass: 60003 Score: 114 Matches: 4(4) Sequences: 3(3)
	keratin 6B, isoform CRA_b [Homo sapiens]
	EAW96629.1 Mass: 59859 Score: 114 Matches: 4(4) Sequences: 3(3)
	keratin 6E, isoform CRA_b [Homo sapiens]
	EAW96630.1 Mass: 59879 Score: 114 Matches: 4(4) Sequences: 3(3)
	hCG2039812, isoform CRA_a [Homo sapiens]
	NP_775109.2 Mass: 59988 Score: 114 Matches: 4(4) Sequences: 3(3)
	keratin, type II cytoskeletal 6C [Homo sapiens]
	KAI2565840.1 Mass: 60056 Score: 114 Matches: 4(4) Sequences: 3(3)
	keratin 6C [Homo sapiens]
	KAI4066093.1 Mass: 60102 Score: 114 Matches: 4(4) Sequences: 3(3)
	keratin 6B [Homo sapiens]
	KAI4066094.1 Mass: 60015 Score: 114 Matches: 4(4) Sequences: 3(3)
	keratin 6C [Homo sapiens]
	XP_008954697.1 Mass: 59981 Score: 114 Matches: 4(4) Sequences: 3(3)
	keratin, type II cytoskeletal 6A [Pan paniscus]
34.	NP_001143.2 Mass: 32831 Score: 114 Matches: 4(4) Sequences: 4(4) emPAI: 0.44
	ADP/ATP translocase 2 [Homo sapiens]
	Query	Observed	Mr(expt)	Mr(calc)	ppm	Miss	Score	Expect	Rank	Unique	Peptide
	4208	337.1975	672.3804	672.3806	-0.33	0	46	0.0004	1	U	R.LAADVGK.A
	5248	428.7488	855.4830	855.4814	1.88	0	55	0.00045	1	U	K.TAVAPIER.V
	5781	488.7770	975.5394	975.5389	0.48	0	38	0.044	1	U	K.QIFLGGVDK.R
	6397	379.5641	1135.6706	1135.6713	-0.62	0	32	0.049	1	U	K.LLLQVQHASK.Q
	Proteins matching the same set of peptides:
	NP_001627.2 Mass: 32845 Score: 114 Matches: 4(4) Sequences: 4(4)
	ADP/ATP translocase 3 [Homo sapiens]
	AAH14775.1 Mass: 32905 Score: 114 Matches: 4(4) Sequences: 4(4)
	Solute carrier family 25 (mitochondrial carrier; adenine nucleotide translocator), member 6 [Homo sapiens]
	AAA35579.1 Mass: 32960 Score: 114 Matches: 4(4) Sequences: 4(4)
	ADP/ATP carrier protein [Homo sapiens]
	AAH68199.1 Mass: 35271 Score: 114 Matches: 4(4) Sequences: 4(4)
	SLC25A5 protein, partial [Homo sapiens]
	EAW89869.1 Mass: 27614 Score: 114 Matches: 4(4) Sequences: 4(4)
	solute carrier family 25 (mitochondrial carrier; adenine nucleotide translocator), member 5, isoform CRA_b [Homo sapiens]
	BAD93059.1 Mass: 35361 Score: 114 Matches: 4(4) Sequences: 4(4)
	ADP,ATP carrier protein, liver isoform T2 variant, partial [Homo sapiens]
	NP_001253938.1 Mass: 32874 Score: 114 Matches: 4(4) Sequences: 4(4)
	ADP/ATP translocase 2 [Macaca mulatta]
35.	NP_055506.1 Mass: 171186 Score: 112 Matches: 3(3) Sequences: 3(3) emPAI: 0.06
	RNA helicase aquarius [Homo sapiens]
	Query	Observed	Mr(expt)	Mr(calc)	ppm	Miss	Score	Expect	Rank	Unique	Peptide
	4969	401.2453	800.4761	800.4756	0.65	0	38	0.034	1	U	K.AVLETIR.N
	6110	524.7488	1047.4830	1047.4833	-0.24	0	53	0.00077	1	U	R.QDIEDSVSR.M
	7087	733.2944	1464.5743	1464.5740	0.23	0	72	1.1e-006	1	U	K.DADVEDEDTEEAK.T
	Proteins matching the same set of peptides:
	ABQ66265.1 Mass: 171142 Score: 112 Matches: 3(3) Sequences: 3(3)
	AQR [Homo sapiens]
	BAF84304.1 Mass: 171187 Score: 112 Matches: 3(3) Sequences: 3(3)
	unnamed protein product [Homo sapiens]
	BAF98706.1 Mass: 156738 Score: 112 Matches: 3(3) Sequences: 3(3)
	unnamed protein product, partial [Homo sapiens]
36.	EAX00324.1 Mass: 108834 Score: 111 Matches: 3(3) Sequences: 3(3) emPAI: 0.09
	echinoderm microtubule associated protein like 4 [Homo sapiens]
	Query	Observed	Mr(expt)	Mr(calc)	ppm	Miss	Score	Expect	Rank	Unique	Peptide
	6589	602.8035	1203.5924	1203.5918	0.52	0	40	0.024	1	U	K.DLLLTCAQDR.Q
	7000	710.3599	1418.7053	1418.7041	0.80	0	49	0.0036	1	U	R.EIEVPDQYGTIR.A
	7025	715.3809	1428.7473	1428.7460	0.89	0	59	0.00039	1	U	R.VQQQEDEITVLK.A
	Proteins matching the same set of peptides:
	AAG09279.2 Mass: 108835 Score: 111 Matches: 3(3) Sequences: 3(3)
	cytoplasmic protein [Homo sapiens]
	AAI46800.1 Mass: 102395 Score: 111 Matches: 3(3) Sequences: 3(3)
	EML4 protein [Homo sapiens]
	NP_061936.3 Mass: 108848 Score: 111 Matches: 3(3) Sequences: 3(3)
	echinoderm microtubule-associated protein-like 4 isoform a [Homo sapiens]
	BAF73612.1 Mass: 145572 Score: 111 Matches: 3(3) Sequences: 3(3)
	fusion protein EML4-ALK variant 2 [Homo sapiens]
	NP_001138548.2 Mass: 102380 Score: 111 Matches: 3(3) Sequences: 3(3)
	echinoderm microtubule-associated protein-like 4 isoform b [Homo sapiens]
	KAI2523161.1 Mass: 110096 Score: 111 Matches: 3(3) Sequences: 3(3)
	EMAP like 4 [Homo sapiens]
	KAI2523163.1 Mass: 102367 Score: 111 Matches: 3(3) Sequences: 3(3)
	EMAP like 4 [Homo sapiens]
	KAI4034308.1 Mass: 108863 Score: 111 Matches: 3(3) Sequences: 3(3)
	EMAP like 4 [Homo sapiens]
	KAI4034310.1 Mass: 110124 Score: 111 Matches: 3(3) Sequences: 3(3)
	EMAP like 4 [Homo sapiens]
	XP_005264324.1 Mass: 110109 Score: 111 Matches: 3(3) Sequences: 3(3)
	echinoderm microtubule-associated protein-like 4 isoform X1 [Homo sapiens]
	XP_005264325.1 Mass: 84832 Score: 111 Matches: 3(3) Sequences: 3(3)
	echinoderm microtubule-associated protein-like 4 isoform X4 [Homo sapiens]
	XP_006712054.1 Mass: 103641 Score: 111 Matches: 3(3) Sequences: 3(3)
	echinoderm microtubule-associated protein-like 4 isoform X2 [Homo sapiens]
37.	NP_004475.1 Mass: 65520 Score: 110 Matches: 2(2) Sequences: 2(2) emPAI: 0.10
	glypican-3 isoform 2 precursor [Homo sapiens]
	Query	Observed	Mr(expt)	Mr(calc)	ppm	Miss	Score	Expect	Rank	Unique	Peptide
	6757	641.3568	1280.6991	1280.6976	1.13	0	57	0.00056	1	U	K.GPEPVVSQIIDK.L
	7137	498.5830	1492.7272	1492.7270	0.13	0	70	3.6e-005	1	U	K.VAHVEHEETLSSR.R
	Proteins matching the same set of peptides:
	AAH35972.1 Mass: 65580 Score: 110 Matches: 2(2) Sequences: 2(2)
	Glypican 3 [Homo sapiens]
	AQN67628.1 Mass: 62286 Score: 110 Matches: 2(2) Sequences: 2(2)
	Glypican 3 [Homo sapiens]
	ABC72125.1 Mass: 59469 Score: 110 Matches: 2(2) Sequences: 2(2)
	glypican-3 splice variant B [Homo sapiens]
	ABC72126.1 Mass: 65552 Score: 110 Matches: 2(2) Sequences: 2(2)
	glypican-3 splice variant A [Homo sapiens]
	ABC72127.1 Mass: 68401 Score: 110 Matches: 2(2) Sequences: 2(2)
	glypican-3 splice variant C [Homo sapiens]
	NP_001158089.1 Mass: 68369 Score: 110 Matches: 2(2) Sequences: 2(2)
	glypican-3 isoform 1 precursor [Homo sapiens]
	NP_001158090.1 Mass: 63686 Score: 110 Matches: 2(2) Sequences: 2(2)
	glypican-3 isoform 3 precursor [Homo sapiens]
	NP_001158091.1 Mass: 59437 Score: 110 Matches: 2(2) Sequences: 2(2)
	glypican-3 isoform 4 precursor [Homo sapiens]
38.	EAW62809.1 Mass: 144866 Score: 101 Matches: 2(2) Sequences: 2(2) emPAI: 0.04
	isoleucine-tRNA synthetase, isoform CRA_a [Homo sapiens]
	Query	Observed	Mr(expt)	Mr(calc)	ppm	Miss	Score	Expect	Rank	Unique	Peptide
	6730	633.8168	1265.6191	1265.6139	4.11	0	70	2.5e-005	1	U	K.LESDYEILER.F
	7089	733.3626	1464.7107	1464.7096	0.72	0	51	0.0021	1	U	K.QLSSEELEQFQK.T
	Proteins matching the same set of peptides:
	EAW62810.1 Mass: 145046 Score: 101 Matches: 2(2) Sequences: 2(2)
	isoleucine-tRNA synthetase, isoform CRA_b [Homo sapiens]
	EAW62811.1 Mass: 120578 Score: 101 Matches: 2(2) Sequences: 2(2)
	isoleucine-tRNA synthetase, isoform CRA_c [Homo sapiens]
	EAW62812.1 Mass: 131680 Score: 101 Matches: 2(2) Sequences: 2(2)
	isoleucine-tRNA synthetase, isoform CRA_d [Homo sapiens]
	BAG62834.1 Mass: 87693 Score: 101 Matches: 2(2) Sequences: 2(2)
	unnamed protein product [Homo sapiens]
	AAH65552.1 Mass: 120550 Score: 101 Matches: 2(2) Sequences: 2(2)
	IARS protein [Homo sapiens]
	AAA80153.1 Mass: 144388 Score: 101 Matches: 2(2) Sequences: 2(2)
	isoleucyl-tRNA synthetase [Homo sapiens]
	BAD92471.1 Mass: 146251 Score: 101 Matches: 2(2) Sequences: 2(2)
	Isoleucyl-tRNA synthetase, cytoplasmic variant, partial [Homo sapiens]
	CAD97659.1 Mass: 142228 Score: 101 Matches: 2(2) Sequences: 2(2)
	hypothetical protein [Homo sapiens]
	CAD97671.1 Mass: 144380 Score: 101 Matches: 2(2) Sequences: 2(2)
	hypothetical protein [Homo sapiens]
	CAD98022.1 Mass: 131622 Score: 101 Matches: 2(2) Sequences: 2(2)
	hypothetical protein [Homo sapiens]
	NP_001361228.1 Mass: 141546 Score: 101 Matches: 2(2) Sequences: 2(2)
	isoleucine--tRNA ligase, cytoplasmic isoform 2 [Homo sapiens]
	NP_001361230.1 Mass: 141287 Score: 101 Matches: 2(2) Sequences: 2(2)
	isoleucine--tRNA ligase, cytoplasmic isoform 3 [Homo sapiens]
	NP_001365498.1 Mass: 146653 Score: 101 Matches: 2(2) Sequences: 2(2)
	isoleucine--tRNA ligase, cytoplasmic isoform 4 [Homo sapiens]
	NP_001365500.1 Mass: 145148 Score: 101 Matches: 2(2) Sequences: 2(2)
	isoleucine--tRNA ligase, cytoplasmic isoform 5 [Homo sapiens]
	NP_001365501.1 Mass: 145248 Score: 101 Matches: 2(2) Sequences: 2(2)
	isoleucine--tRNA ligase, cytoplasmic isoform 13 [Homo sapiens]
	NP_001365502.1 Mass: 144406 Score: 101 Matches: 2(2) Sequences: 2(2)
	isoleucine--tRNA ligase, cytoplasmic isoform 1 [Homo sapiens]
	NP_001365506.1 Mass: 142865 Score: 101 Matches: 2(2) Sequences: 2(2)
	isoleucine--tRNA ligase, cytoplasmic isoform 6 [Homo sapiens]
	NP_001365507.1 Mass: 142291 Score: 101 Matches: 2(2) Sequences: 2(2)
	isoleucine--tRNA ligase, cytoplasmic isoform 7 [Homo sapiens]
	NP_001365511.1 Mass: 140415 Score: 101 Matches: 2(2) Sequences: 2(2)
	isoleucine--tRNA ligase, cytoplasmic isoform 8 [Homo sapiens]
	NP_001365512.1 Mass: 139823 Score: 101 Matches: 2(2) Sequences: 2(2)
	isoleucine--tRNA ligase, cytoplasmic isoform 9 [Homo sapiens]
	NP_001365513.1 Mass: 139430 Score: 101 Matches: 2(2) Sequences: 2(2)
	isoleucine--tRNA ligase, cytoplasmic isoform 10 [Homo sapiens]
	NP_001365514.1 Mass: 139336 Score: 101 Matches: 2(2) Sequences: 2(2)
	isoleucine--tRNA ligase, cytoplasmic isoform 11 [Homo sapiens]
	NP_001365515.1 Mass: 138782 Score: 101 Matches: 2(2) Sequences: 2(2)
	isoleucine--tRNA ligase, cytoplasmic isoform 12 [Homo sapiens]
	KAI2553111.1 Mass: 129468 Score: 101 Matches: 2(2) Sequences: 2(2)
	isoleucyl-tRNA synthetase 1 [Homo sapiens]
39.	NP_000205.1 Mass: 133709 Score: 99 Matches: 2(2) Sequences: 2(2) emPAI: 0.05
	protein jagged-1 precursor [Homo sapiens]
	Query	Observed	Mr(expt)	Mr(calc)	ppm	Miss	Score	Expect	Rank	Unique	Peptide
	6383	566.7835	1131.5523	1131.5520	0.32	0	66	6.3e-005	1	U	R.DLESAQSLNR.M
	6834	440.2115	1317.6128	1317.6136	-0.57	0	51	0.0014	1	U	R.YISSNVCGPHGK.C
	Proteins matching the same set of peptides:
	BAG35596.1 Mass: 133769 Score: 99 Matches: 2(2) Sequences: 2(2)
	unnamed protein product [Homo sapiens]
	AAB39007.1 Mass: 133650 Score: 99 Matches: 2(2) Sequences: 2(2)
	transmembrane protein Jagged 1 [Homo sapiens]
	AAC51731.1 Mass: 133769 Score: 99 Matches: 2(2) Sequences: 2(2)
	Jagged1 [Homo sapiens]
	AAH98393.1 Mass: 133784 Score: 99 Matches: 2(2) Sequences: 2(2)
	Jagged 1 (Alagille syndrome) [Homo sapiens]
	XP_011854165.1 Mass: 116500 Score: 99 Matches: 2(2) Sequences: 2(2)
	PREDICTED: protein jagged-1 isoform X2 [Mandrillus leucophaeus]
40.	AAH00062.1 Mass: 56576 Score: 98 Matches: 2(2) Sequences: 2(2) emPAI: 0.11
	Solute carrier family 1 (neutral amino acid transporter), member 5 [Homo sapiens]
	Query	Observed	Mr(expt)	Mr(calc)	ppm	Miss	Score	Expect	Rank	Unique	Peptide
	6304	551.7723	1101.5300	1101.5302	-0.19	0	73	1e-005	1	U	R.GPAGDATVASEK.E
	6391	568.2481	1134.4817	1134.4829	-1.09	0	43	0.0039	1	U	R.SYSTTYEER.N
	Proteins matching the same set of peptides:
	NP_005619.1 Mass: 56562 Score: 98 Matches: 2(2) Sequences: 2(2)
	neutral amino acid transporter B(0) isoform 1 [Homo sapiens]
	AAD09812.1 Mass: 56404 Score: 98 Matches: 2(2) Sequences: 2(2)
	RD114/simian type D retrovirus receptor [Homo sapiens]
	AAD09814.1 Mass: 56547 Score: 98 Matches: 2(2) Sequences: 2(2)
	neutral amino acid transporter [Homo sapiens]
	AAC50629.1 Mass: 56585 Score: 98 Matches: 2(2) Sequences: 2(2)
	neutral amino acid transporter B [Homo sapiens]
	AAK77026.1 Mass: 55239 Score: 98 Matches: 2(2) Sequences: 2(2)
	sodium-dependent neutral amino acid transporter type 2 truncated isoform, partial [Homo sapiens]
	BAD92975.1 Mass: 57354 Score: 98 Matches: 2(2) Sequences: 2(2)
	solute carrier family 1 (neutral amino acid transporter), member 5 variant, partial [Homo sapiens]
	KAI2591913.1 Mass: 39418 Score: 98 Matches: 2(2) Sequences: 2(2)
	solute carrier family 1 member 5 [Homo sapiens]
41.	BAA32484.1 Mass: 205478 Score: 86 Matches: 1(1) Sequences: 1(1) emPAI: 0.02
	AF-6 [Homo sapiens]
	Query	Observed	Mr(expt)	Mr(calc)	ppm	Miss	Score	Expect	Rank	Unique	Peptide
	6826	657.8590	1313.7033	1313.6939	7.17	0	86	7.9e-007	1	U	R.LAAGDQLLSVDGR.S
	Proteins matching the same set of peptides:
	BAA32485.1 Mass: 181787 Score: 86 Matches: 1(1) Sequences: 1(1)
	AF-6 [Homo sapiens]
	EAW47483.1 Mass: 188908 Score: 86 Matches: 1(1) Sequences: 1(1)
	myeloid/lymphoid or mixed-lineage leukemia (trithorax homolog, Drosophila); translocated to, 4, isoform CRA_d [Homo sapiens]
	EAW47484.1 Mass: 207659 Score: 86 Matches: 1(1) Sequences: 1(1)
	myeloid/lymphoid or mixed-lineage leukemia (trithorax homolog, Drosophila); translocated to, 4, isoform CRA_e [Homo sapiens]
	EAW47485.1 Mass: 197887 Score: 86 Matches: 1(1) Sequences: 1(1)
	myeloid/lymphoid or mixed-lineage leukemia (trithorax homolog, Drosophila); translocated to, 4, isoform CRA_f [Homo sapiens]
	EAW47486.1 Mass: 205834 Score: 86 Matches: 1(1) Sequences: 1(1)
	myeloid/lymphoid or mixed-lineage leukemia (trithorax homolog, Drosophila); translocated to, 4, isoform CRA_g [Homo sapiens]
	AAC50059.1 Mass: 181869 Score: 86 Matches: 1(1) Sequences: 1(1)
	ALL-1 fusion partner from chromosome 6 [Homo sapiens]
	AAI56049.1 Mass: 181886 Score: 86 Matches: 1(1) Sequences: 1(1)
	Myeloid/lymphoid or mixed-lineage leukemia (trithorax homolog, Drosophila); translocated to, 4, partial [synthetic construct]
	BAK64145.1 Mass: 201694 Score: 86 Matches: 1(1) Sequences: 1(1)
	afadin [Homo sapiens]
	CAB82312.1 Mass: 159478 Score: 86 Matches: 1(1) Sequences: 1(1)
	hypothetical protein, partial [Homo sapiens]
	BAD92657.1 Mass: 186183 Score: 86 Matches: 1(1) Sequences: 1(1)
	Afadin variant, partial [Homo sapiens]
	NP_001035089.1 Mass: 187556 Score: 86 Matches: 1(1) Sequences: 1(1)
	afadin isoform 2 [Homo sapiens]
	NP_001193937.1 Mass: 197531 Score: 86 Matches: 1(1) Sequences: 1(1)
	afadin isoform 1 [Homo sapiens]
	NP_001278893.1 Mass: 201680 Score: 86 Matches: 1(1) Sequences: 1(1)
	afadin isoform 4 [Homo sapiens]
	NP_001353248.1 Mass: 206435 Score: 86 Matches: 1(1) Sequences: 1(1)
	afadin isoform 5 [Homo sapiens]
	NP_001353249.1 Mass: 206676 Score: 86 Matches: 1(1) Sequences: 1(1)
	afadin isoform 6 [Homo sapiens]
	NP_001353250.1 Mass: 205646 Score: 86 Matches: 1(1) Sequences: 1(1)
	afadin isoform 7 [Homo sapiens]
	NP_001373817.1 Mass: 207489 Score: 86 Matches: 1(1) Sequences: 1(1)
	afadin isoform 8 [Homo sapiens]
	KAI2544600.1 Mass: 189036 Score: 86 Matches: 1(1) Sequences: 1(1)
	afadin, adherens junction formation factor [Homo sapiens]
	XP_005267054.1 Mass: 206564 Score: 86 Matches: 1(1) Sequences: 1(1)
	afadin isoform X31 [Homo sapiens]
	XP_006715554.1 Mass: 200672 Score: 86 Matches: 1(1) Sequences: 1(1)
	afadin isoform X46 [Homo sapiens]
	XP_016866367.1 Mass: 207618 Score: 86 Matches: 1(1) Sequences: 1(1)
	afadin isoform X27 [Homo sapiens]
	XP_016866371.1 Mass: 206805 Score: 86 Matches: 1(1) Sequences: 1(1)
	afadin isoform X29 [Homo sapiens]
	XP_016866373.1 Mass: 205517 Score: 86 Matches: 1(1) Sequences: 1(1)
	afadin isoform X32 [Homo sapiens]
	XP_016866374.1 Mass: 204576 Score: 86 Matches: 1(1) Sequences: 1(1)
	afadin isoform X41 [Homo sapiens]
	XP_047274744.1 Mass: 215863 Score: 86 Matches: 1(1) Sequences: 1(1)
	afadin isoform X1 [Homo sapiens]
	XP_047274745.1 Mass: 215649 Score: 86 Matches: 1(1) Sequences: 1(1)
	afadin isoform X2 [Homo sapiens]
	XP_047274746.1 Mass: 215621 Score: 86 Matches: 1(1) Sequences: 1(1)
	afadin isoform X3 [Homo sapiens]
	XP_047274747.1 Mass: 215408 Score: 86 Matches: 1(1) Sequences: 1(1)
	afadin isoform X4 [Homo sapiens]
	XP_047274748.1 Mass: 215049 Score: 86 Matches: 1(1) Sequences: 1(1)
	afadin isoform X5 [Homo sapiens]
	XP_047274749.1 Mass: 214836 Score: 86 Matches: 1(1) Sequences: 1(1)
	afadin isoform X6 [Homo sapiens]
	XP_047274750.1 Mass: 214808 Score: 86 Matches: 1(1) Sequences: 1(1)
	afadin isoform X7 [Homo sapiens]
	XP_047274751.1 Mass: 214679 Score: 86 Matches: 1(1) Sequences: 1(1)
	afadin isoform X8 [Homo sapiens]
	XP_047274752.1 Mass: 213891 Score: 86 Matches: 1(1) Sequences: 1(1)
	afadin isoform X9 [Homo sapiens]
	XP_047274753.1 Mass: 213763 Score: 86 Matches: 1(1) Sequences: 1(1)
	afadin isoform X10 [Homo sapiens]
	XP_047274754.1 Mass: 213678 Score: 86 Matches: 1(1) Sequences: 1(1)
	afadin isoform X11 [Homo sapiens]
	XP_047274755.1 Mass: 213420 Score: 86 Matches: 1(1) Sequences: 1(1)
	afadin isoform X12 [Homo sapiens]
	XP_047274756.1 Mass: 213436 Score: 86 Matches: 1(1) Sequences: 1(1)
	afadin isoform X13 [Homo sapiens]
	XP_047274757.1 Mass: 213077 Score: 86 Matches: 1(1) Sequences: 1(1)
	afadin isoform X14 [Homo sapiens]
	XP_047274758.1 Mass: 212949 Score: 86 Matches: 1(1) Sequences: 1(1)
	afadin isoform X15 [Homo sapiens]
	XP_047274759.1 Mass: 212948 Score: 86 Matches: 1(1) Sequences: 1(1)
	afadin isoform X16 [Homo sapiens]
	XP_047274760.1 Mass: 212864 Score: 86 Matches: 1(1) Sequences: 1(1)
	afadin isoform X17 [Homo sapiens]
	XP_047274761.1 Mass: 212836 Score: 86 Matches: 1(1) Sequences: 1(1)
	afadin isoform X18 [Homo sapiens]
	XP_047274762.1 Mass: 212820 Score: 86 Matches: 1(1) Sequences: 1(1)
	afadin isoform X19 [Homo sapiens]
	XP_047274763.1 Mass: 212735 Score: 86 Matches: 1(1) Sequences: 1(1)
	afadin isoform X20 [Homo sapiens]
	XP_047274764.1 Mass: 212736 Score: 86 Matches: 1(1) Sequences: 1(1)
	afadin isoform X21 [Homo sapiens]
	XP_047274765.1 Mass: 212707 Score: 86 Matches: 1(1) Sequences: 1(1)
	afadin isoform X22 [Homo sapiens]
	XP_047274766.1 Mass: 212708 Score: 86 Matches: 1(1) Sequences: 1(1)
	afadin isoform X23 [Homo sapiens]
	XP_047274767.1 Mass: 212623 Score: 86 Matches: 1(1) Sequences: 1(1)
	afadin isoform X24 [Homo sapiens]
	XP_047274768.1 Mass: 212494 Score: 86 Matches: 1(1) Sequences: 1(1)
	afadin isoform X25 [Homo sapiens]
	XP_047274769.1 Mass: 212495 Score: 86 Matches: 1(1) Sequences: 1(1)
	afadin isoform X26 [Homo sapiens]
	XP_047274770.1 Mass: 207377 Score: 86 Matches: 1(1) Sequences: 1(1)
	afadin isoform X28 [Homo sapiens]
	XP_047274771.1 Mass: 206677 Score: 86 Matches: 1(1) Sequences: 1(1)
	afadin isoform X30 [Homo sapiens]
	XP_047274772.1 Mass: 205518 Score: 86 Matches: 1(1) Sequences: 1(1)
	afadin isoform X33 [Homo sapiens]
	XP_047274773.1 Mass: 205389 Score: 86 Matches: 1(1) Sequences: 1(1)
	afadin isoform X34 [Homo sapiens]
	XP_047274774.1 Mass: 205405 Score: 86 Matches: 1(1) Sequences: 1(1)
	afadin isoform X35 [Homo sapiens]
	XP_047274775.1 Mass: 205276 Score: 86 Matches: 1(1) Sequences: 1(1)
	afadin isoform X36 [Homo sapiens]
	XP_047274776.1 Mass: 205277 Score: 86 Matches: 1(1) Sequences: 1(1)
	afadin isoform X37 [Homo sapiens]
	XP_047274777.1 Mass: 204833 Score: 86 Matches: 1(1) Sequences: 1(1)
	afadin isoform X38 [Homo sapiens]
	XP_047274778.1 Mass: 204704 Score: 86 Matches: 1(1) Sequences: 1(1)
	afadin isoform X39 [Homo sapiens]
	XP_047274779.1 Mass: 204705 Score: 86 Matches: 1(1) Sequences: 1(1)
	afadin isoform X40 [Homo sapiens]
	XP_047274780.1 Mass: 204592 Score: 86 Matches: 1(1) Sequences: 1(1)
	afadin isoform X42 [Homo sapiens]
	XP_047274781.1 Mass: 204463 Score: 86 Matches: 1(1) Sequences: 1(1)
	afadin isoform X43 [Homo sapiens]
	XP_047274782.1 Mass: 204464 Score: 86 Matches: 1(1) Sequences: 1(1)
	afadin isoform X44 [Homo sapiens]
	XP_047274783.1 Mass: 204335 Score: 86 Matches: 1(1) Sequences: 1(1)
	afadin isoform X45 [Homo sapiens]
42.	AAP06954.1 Mass: 184432 Score: 80 Matches: 2(2) Sequences: 2(2) emPAI: 0.03
	IQGAP3 [Homo sapiens]
	Query	Observed	Mr(expt)	Mr(calc)	ppm	Miss	Score	Expect	Rank	Unique	Peptide
	6378	377.5282	1129.5629	1129.5629	0.01	0	45	0.0065	1	U	K.AFSGQSQHLR.V
	7818	982.1992	2943.5757	2943.5665	3.11	0	55	0.00069	1	U	K.IGGILANELSVDEAAVHAAVLAINEAVER.G
	Proteins matching the same set of peptides:
	AAI31537.1 Mass: 184404 Score: 80 Matches: 2(2) Sequences: 2(2)
	IQ motif containing GTPase activating protein 3 [Homo sapiens]
	EAW52945.1 Mass: 179287 Score: 80 Matches: 2(2) Sequences: 2(2)
	IQ motif containing GTPase activating protein 3, isoform CRA_a [Homo sapiens]
	EAW52946.1 Mass: 185369 Score: 80 Matches: 2(2) Sequences: 2(2)
	IQ motif containing GTPase activating protein 3, isoform CRA_b [Homo sapiens]
	EAW52947.1 Mass: 184499 Score: 80 Matches: 2(2) Sequences: 2(2)
	IQ motif containing GTPase activating protein 3, isoform CRA_c [Homo sapiens]
	NP_839943.3 Mass: 184584 Score: 80 Matches: 2(2) Sequences: 2(2)
	ras GTPase-activating-like protein IQGAP3 [Homo sapiens]
	KAI2519715.1 Mass: 179220 Score: 80 Matches: 2(2) Sequences: 2(2)
	IQ motif containing GTPase activating protein 3 [Homo sapiens]
	XP_011507500.1 Mass: 185057 Score: 80 Matches: 2(2) Sequences: 2(2)
	ras GTPase-activating-like protein IQGAP3 isoform X1 [Homo sapiens]
	XP_047301946.1 Mass: 184986 Score: 80 Matches: 2(2) Sequences: 2(2)
	ras GTPase-activating-like protein IQGAP3 isoform X2 [Homo sapiens]
	XP_047301952.1 Mass: 184513 Score: 80 Matches: 2(2) Sequences: 2(2)
	ras GTPase-activating-like protein IQGAP3 isoform X3 [Homo sapiens]
	XP_047301959.1 Mass: 169040 Score: 80 Matches: 2(2) Sequences: 2(2)
	ras GTPase-activating-like protein IQGAP3 isoform X4 [Homo sapiens]
43.	Q5VTE0.1 Mass: 50153 Score: 79 Matches: 3(3) Sequences: 3(3) emPAI: 0.20
	PUTATIVE PSEUDOGENE: RecName: Full=Putative elongation factor 1-alpha-like 3; Short=EF-1-alpha-like 3; AltName: Full=Eukaryotic elongation factor 1 A-like 3; Short=eEF1A-like 3; AltName: Full=Eukaryotic translation elongation factor 1 alpha-1 pseudo
	Query	Observed	Mr(expt)	Mr(calc)	ppm	Miss	Score	Expect	Rank	Unique	Peptide
	5385	435.7741	869.5337	869.5334	0.25	0	35	0.024	1	U	K.QLIVGVNK.M
	5987	513.3091	1024.6037	1024.6030	0.76	0	54	0.0004	1	U	K.IGGIGTVPVGR.V
	6978	468.9139	1403.7199	1403.7197	0.11	0	40	0.031	1	U	K.YYVTIIDAPGHR.D
	Proteins matching the same set of peptides:
	AAC09385.1 Mass: 42797 Score: 79 Matches: 3(3) Sequences: 3(3)
	eukaryotic translation elongation factor 1 alpha 1-like 14 [Homo sapiens]
	CAA34756.1 Mass: 50095 Score: 79 Matches: 3(3) Sequences: 3(3)
	unnamed protein product [Homo sapiens]
	AAF36537.1 Mass: 46240 Score: 79 Matches: 3(3) Sequences: 3(3)
	glucocorticoid receptor AF-1 specific elongation factor, partial [Homo sapiens]
	AAH71727.1 Mass: 50153 Score: 79 Matches: 3(3) Sequences: 3(3)
	Eukaryotic translation elongation factor 1 alpha 1 [Homo sapiens]
	AAH71841.1 Mass: 50091 Score: 79 Matches: 3(3) Sequences: 3(3)
	Eukaryotic translation elongation factor 1 alpha 1 [Homo sapiens]
	BAF85328.1 Mass: 50169 Score: 79 Matches: 3(3) Sequences: 3(3)
	unnamed protein product [Homo sapiens]
	AAK93966.1 Mass: 42997 Score: 79 Matches: 3(3) Sequences: 3(3)
	translation elongation factor 1 alpha 1-like 14 [Homo sapiens]
	BAD96235.1 Mass: 50093 Score: 79 Matches: 3(3) Sequences: 3(3)
	eukaryotic translation elongation factor 1 alpha 1 variant, partial [Homo sapiens]
	BAD96243.1 Mass: 50167 Score: 79 Matches: 3(3) Sequences: 3(3)
	eukaryotic translation elongation factor 1 alpha 1 variant, partial [Homo sapiens]
	BAD96271.1 Mass: 50110 Score: 79 Matches: 3(3) Sequences: 3(3)
	eukaryotic translation elongation factor 1 alpha 1 variant, partial [Homo sapiens]
	BAD96702.1 Mass: 50079 Score: 79 Matches: 3(3) Sequences: 3(3)
	eukaryotic translation elongation factor 1 alpha 1 variant, partial [Homo sapiens]
	BAD96750.1 Mass: 50079 Score: 79 Matches: 3(3) Sequences: 3(3)
	eukaryotic translation elongation factor 1 alpha 1 variant, partial [Homo sapiens]
	BAD96766.1 Mass: 50081 Score: 79 Matches: 3(3) Sequences: 3(3)
	eukaryotic translation elongation factor 1 alpha 1 variant, partial [Homo sapiens]
	WP_094948604.1 Mass: 50109 Score: 79 Matches: 3(3) Sequences: 3(3)
	MULTISPECIES: translation elongation factor EF-1 subunit alpha [Gammaproteobacteria]
44.	BAS02858.1 Mass: 7148 Score: 79 Matches: 3(3) Sequences: 1(1) emPAI: 0.48
	T cell receptor alpha chain V-J-region, partial [Homo sapiens]
	Query	Observed	Mr(expt)	Mr(calc)	ppm	Miss	Score	Expect	Rank	Unique	Peptide
	5173	421.7583	841.5021	841.5022	-0.05	0	46	0.0038	1	U	K.GITLSVRP.- 5166 5168
	Proteins matching the same set of peptides:
	BAS02935.1 Mass: 6332 Score: 79 Matches: 3(3) Sequences: 1(1)
	T cell receptor alpha chain V-J-region, partial [Homo sapiens]
	BAS03310.1 Mass: 12419 Score: 79 Matches: 3(3) Sequences: 1(1)
	T cell receptor alpha chain V-J-region, partial [Homo sapiens]
	BAS03471.1 Mass: 12148 Score: 79 Matches: 3(3) Sequences: 1(1)
	T cell receptor alpha chain V-J-region, partial [Homo sapiens]
	ANO54722.1 Mass: 4375 Score: 79 Matches: 3(3) Sequences: 1(1)
	T-cell receptor alpha chain variable region, partial [Homo sapiens]
	ANO54725.1 Mass: 4830 Score: 79 Matches: 3(3) Sequences: 1(1)
	T-cell receptor alpha chain variable region, partial [Homo sapiens]
	ANO54729.1 Mass: 10824 Score: 79 Matches: 3(3) Sequences: 1(1)
	T-cell receptor alpha chain variable region, partial [Homo sapiens]
	ANO55275.1 Mass: 8051 Score: 79 Matches: 3(3) Sequences: 1(1)
	T-cell receptor alpha chain variable region, partial [Homo sapiens]
	ANO55677.1 Mass: 8525 Score: 79 Matches: 3(3) Sequences: 1(1)
	T-cell receptor alpha chain variable region, partial [Homo sapiens]
	ANO55730.1 Mass: 10578 Score: 79 Matches: 3(3) Sequences: 1(1)
	T-cell receptor alpha chain variable region, partial [Homo sapiens]
	ANO56727.1 Mass: 10551 Score: 79 Matches: 3(3) Sequences: 1(1)
	T-cell receptor alpha chain variable region, partial [Homo sapiens]
	AAB86742.1 Mass: 2212 Score: 79 Matches: 3(3) Sequences: 1(1)
	putative, partial [Homo sapiens]
45.	NP_001667.4 Mass: 115437 Score: 77 Matches: 2(2) Sequences: 2(2) emPAI: 0.05
	potassium-transporting ATPase alpha chain 2 isoform 2 [Homo sapiens]
	Query	Observed	Mr(expt)	Mr(calc)	ppm	Miss	Score	Expect	Rank	Unique	Peptide
	4641	372.2240	742.4335	742.4337	-0.26	0	52	0.00043	1	U	R.AAELLAR.D
	6260	544.2994	1086.5843	1086.5856	-1.13	0	55	0.001	1		K.LIIVEGCQR.Q
	Proteins matching the same set of peptides:
	AAC37589.2 Mass: 115825 Score: 77 Matches: 2(2) Sequences: 2(2)
	non-gastric H+,K+-ATPase [Homo sapiens]
	NP_001172014.1 Mass: 115979 Score: 77 Matches: 2(2) Sequences: 2(2)
	potassium-transporting ATPase alpha chain 2 isoform 1 [Homo sapiens]
46.	AAH22792.1 Mass: 118161 Score: 75 Matches: 2(2) Sequences: 2(2) emPAI: 0.05
	VPRBP protein [Homo sapiens]
	Query	Observed	Mr(expt)	Mr(calc)	ppm	Miss	Score	Expect	Rank	Unique	Peptide
	6265	545.3109	1088.6073	1088.6077	-0.44	0	40	0.023	1	U	K.GLGETATVLTK.E
	6368	563.8082	1125.6019	1125.6030	-0.98	0	51	0.0026	1	U	M.TTVVVHVDSK.A
	Proteins matching the same set of peptides:
	EAW65140.1 Mass: 118602 Score: 75 Matches: 2(2) Sequences: 2(2)
	Vpr (HIV-1) binding protein, isoform CRA_a [Homo sapiens]
	EAW65142.1 Mass: 168886 Score: 75 Matches: 2(2) Sequences: 2(2)
	Vpr (HIV-1) binding protein, isoform CRA_c [Homo sapiens]
	NP_001165375.1 Mass: 168829 Score: 75 Matches: 2(2) Sequences: 2(2)
	DDB1- and CUL4-associated factor 1 isoform 2 [Homo sapiens]
	NP_001336097.1 Mass: 168900 Score: 75 Matches: 2(2) Sequences: 2(2)
	DDB1- and CUL4-associated factor 1 isoform 1 [Homo sapiens]
	XP_011794689.1 Mass: 162998 Score: 75 Matches: 2(2) Sequences: 2(2)
	PREDICTED: protein VPRBP [Colobus angolensis palliatus]
	XP_047305230.1 Mass: 168118 Score: 75 Matches: 2(2) Sequences: 2(2)
	DDB1- and CUL4-associated factor 1 isoform X2 [Homo sapiens]
47.	NP_002262.4 Mass: 123550 Score: 70 Matches: 2(2) Sequences: 2(2) emPAI: 0.05
	importin-5 [Homo sapiens]
	Query	Observed	Mr(expt)	Mr(calc)	ppm	Miss	Score	Expect	Rank	Unique	Peptide
	6054	519.2908	1036.5671	1036.5665	0.56	0	38	0.028	1	U	K.HIVENAVQK.E
	7764	915.1519	2742.4339	2742.4340	-0.04	0	50	0.0028	1	U	M.AAAAAEQQQFYLLLGNLLSPDNVVR.K
	Proteins matching the same set of peptides:
	EAX08979.1 Mass: 123593 Score: 70 Matches: 2(2) Sequences: 2(2)
	RAN binding protein 5, isoform CRA_c [Homo sapiens]
	AAC51317.1 Mass: 123512 Score: 70 Matches: 2(2) Sequences: 2(2)
	karyopherin beta 3 [Homo sapiens]
	BAG64528.1 Mass: 109288 Score: 70 Matches: 2(2) Sequences: 2(2)
	unnamed protein product [Homo sapiens]
48.	NP_002947.1 Mass: 160891 Score: 68 Matches: 2(2) Sequences: 2(2) emPAI: 0.04
	CAP-Gly domain-containing linker protein 1 isoform a [Homo sapiens]
	Query	Observed	Mr(expt)	Mr(calc)	ppm	Miss	Score	Expect	Rank	Unique	Peptide
	5399	437.7225	873.4304	873.4304	-0.00	0	39	0.037	1	U	K.NDGSVAGVR.Y
	6354	561.2833	1120.5521	1120.5513	0.76	0	46	0.0075	1	U	K.ANENASFLQK.S
	Proteins matching the same set of peptides:
	AAI14214.1 Mass: 156671 Score: 68 Matches: 2(2) Sequences: 2(2)
	CAP-GLY domain containing linker protein 1 [Homo sapiens]
	AAI17210.1 Mass: 162171 Score: 68 Matches: 2(2) Sequences: 2(2)
	CLIP1 protein [Homo sapiens]
	AAA35693.1 Mass: 156699 Score: 68 Matches: 2(2) Sequences: 2(2)
	cytoplasmic linker protein-170 alpha-2 [Homo sapiens]
	NP_937883.1 Mass: 156685 Score: 68 Matches: 2(2) Sequences: 2(2)
	CAP-Gly domain-containing linker protein 1 isoform b [Homo sapiens]
	NP_001234926.1 Mass: 162147 Score: 68 Matches: 2(2) Sequences: 2(2)
	CAP-Gly domain-containing linker protein 1 isoform c [Homo sapiens]
	NP_001376220.1 Mass: 243303 Score: 68 Matches: 2(2) Sequences: 2(2)
	CAP-Gly domain-containing linker protein 1 isoform d [Homo sapiens]
	KAI2568480.1 Mass: 148052 Score: 68 Matches: 2(2) Sequences: 2(2)
	CAP-Gly domain containing linker protein 1 [Homo sapiens]
	KAI2568482.1 Mass: 160905 Score: 68 Matches: 2(2) Sequences: 2(2)
	CAP-Gly domain containing linker protein 1 [Homo sapiens]
	KAI2568484.1 Mass: 162161 Score: 68 Matches: 2(2) Sequences: 2(2)
	CAP-Gly domain containing linker protein 1 [Homo sapiens]
	XP_005253650.1 Mass: 162406 Score: 68 Matches: 2(2) Sequences: 2(2)
	CAP-Gly domain-containing linker protein 1 isoform X1 [Homo sapiens]
	XP_006719615.1 Mass: 161150 Score: 68 Matches: 2(2) Sequences: 2(2)
	CAP-Gly domain-containing linker protein 1 isoform X2 [Homo sapiens]
	XP_016875277.1 Mass: 156944 Score: 68 Matches: 2(2) Sequences: 2(2)
	CAP-Gly domain-containing linker protein 1 isoform X6 [Homo sapiens]
	XP_016875280.1 Mass: 156702 Score: 68 Matches: 2(2) Sequences: 2(2)
	CAP-Gly domain-containing linker protein 1 isoform X8 [Homo sapiens]
	XP_016875281.1 Mass: 152495 Score: 68 Matches: 2(2) Sequences: 2(2)
	CAP-Gly domain-containing linker protein 1 isoform X10 [Homo sapiens]
	XP_047285267.1 Mass: 158199 Score: 68 Matches: 2(2) Sequences: 2(2)
	CAP-Gly domain-containing linker protein 1 isoform X4 [Homo sapiens]
	XP_047285269.1 Mass: 157940 Score: 68 Matches: 2(2) Sequences: 2(2)
	CAP-Gly domain-containing linker protein 1 isoform X5 [Homo sapiens]
	XP_047285274.1 Mass: 155029 Score: 68 Matches: 2(2) Sequences: 2(2)
	CAP-Gly domain-containing linker protein 1 isoform X9 [Homo sapiens]
	XP_047285275.1 Mass: 152236 Score: 68 Matches: 2(2) Sequences: 2(2)
	CAP-Gly domain-containing linker protein 1 isoform X11 [Homo sapiens]
	XP_047285276.1 Mass: 149567 Score: 68 Matches: 2(2) Sequences: 2(2)
	CAP-Gly domain-containing linker protein 1 isoform X12 [Homo sapiens]
	XP_047285277.1 Mass: 144860 Score: 68 Matches: 2(2) Sequences: 2(2)
	CAP-Gly domain-containing linker protein 1 isoform X13 [Homo sapiens]
49.	AAD09924.1 Mass: 119755 Score: 62 Matches: 1(1) Sequences: 1(1) emPAI: 0.03
	plasma membrane calcium ATPase isoform 1, partial [Homo sapiens]
	Query	Observed	Mr(expt)	Mr(calc)	ppm	Miss	Score	Expect	Rank	Unique	Peptide
	6561	595.8045	1189.5944	1189.5939	0.47	0	62	0.00015	1	U	K.GIIDSTVSDQR.Q
	Proteins matching the same set of peptides:
	AAD09925.1 Mass: 114590 Score: 62 Matches: 1(1) Sequences: 1(1)
	plasma membrane calcium ATPase isoform 1, partial [Homo sapiens]
	AAA36000.1 Mass: 106575 Score: 62 Matches: 1(1) Sequences: 1(1)
	adenosine triphosphatase [Homo sapiens]
	AAA74511.1 Mass: 134625 Score: 62 Matches: 1(1) Sequences: 1(1)
	plasma membrane Ca2+ pumping ATPase [Homo sapiens]
	BAD92133.1 Mass: 93397 Score: 62 Matches: 1(1) Sequences: 1(1)
	plasma membrane calcium ATPase 1 isoform 1a variant, partial [Homo sapiens]
	NP_001001323.1 Mass: 129434 Score: 62 Matches: 1(1) Sequences: 1(1)
	plasma membrane calcium-transporting ATPase 1 isoform 1a [Homo sapiens]
	NP_001353449.1 Mass: 134600 Score: 62 Matches: 1(1) Sequences: 1(1)
	plasma membrane calcium-transporting ATPase 1 isoform 1b [Homo sapiens]
	NP_001353453.1 Mass: 137717 Score: 62 Matches: 1(1) Sequences: 1(1)
	plasma membrane calcium-transporting ATPase 1 isoform 2 [Homo sapiens]
	NP_001353455.1 Mass: 129070 Score: 62 Matches: 1(1) Sequences: 1(1)
	plasma membrane calcium-transporting ATPase 1 isoform 3 [Homo sapiens]
	NP_001353457.1 Mass: 125369 Score: 62 Matches: 1(1) Sequences: 1(1)
	plasma membrane calcium-transporting ATPase 1 isoform 4 [Homo sapiens]
	NP_001353458.1 Mass: 125005 Score: 62 Matches: 1(1) Sequences: 1(1)
	plasma membrane calcium-transporting ATPase 1 isoform 5 [Homo sapiens]
	NP_001353459.1 Mass: 121841 Score: 62 Matches: 1(1) Sequences: 1(1)
	plasma membrane calcium-transporting ATPase 1 isoform 6 [Homo sapiens]
	NP_001353460.1 Mass: 109298 Score: 62 Matches: 1(1) Sequences: 1(1)
	plasma membrane calcium-transporting ATPase 1 isoform 7 [Homo sapiens]
	KAI2567285.1 Mass: 106789 Score: 62 Matches: 1(1) Sequences: 1(1)
	ATPase plasma membrane Ca2+ transporting 1 [Homo sapiens]
	XP_016779448.1 Mass: 133652 Score: 62 Matches: 1(1) Sequences: 1(1)
	plasma membrane calcium-transporting ATPase 1 isoform X4 [Pan troglodytes]
	XP_016779450.1 Mass: 130535 Score: 62 Matches: 1(1) Sequences: 1(1)
	plasma membrane calcium-transporting ATPase 1 isoform X6 [Pan troglodytes]
	XP_016779452.1 Mass: 138668 Score: 62 Matches: 1(1) Sequences: 1(1)
	plasma membrane calcium-transporting ATPase 1 isoform X9 [Pan troglodytes]
50.	NP_071934.3 Mass: 135540 Score: 61 Matches: 1(1) Sequences: 1(1) emPAI: 0.02
	inverted formin-2 isoform 1 [Homo sapiens]
	Query	Observed	Mr(expt)	Mr(calc)	ppm	Miss	Score	Expect	Rank	Unique	Peptide
	6673	623.3121	1244.6096	1244.6109	-1.07	0	61	0.00019	1	U	K.SVQANLDQSQR.G
	Proteins matching the same set of peptides:
	EAW81873.1 Mass: 125023 Score: 61 Matches: 1(1) Sequences: 1(1)
	hCG2029577, isoform CRA_c [Homo sapiens]
	EAW81874.1 Mass: 108082 Score: 61 Matches: 1(1) Sequences: 1(1)
	hCG2029577, isoform CRA_d [Homo sapiens]
	EAW81875.1 Mass: 124017 Score: 61 Matches: 1(1) Sequences: 1(1)
	hCG2029577, isoform CRA_e [Homo sapiens]
	NP_001026884.3 Mass: 134533 Score: 61 Matches: 1(1) Sequences: 1(1)
	inverted formin-2 isoform 2 [Homo sapiens]
	KAI2573013.1 Mass: 138974 Score: 61 Matches: 1(1) Sequences: 1(1)
	inverted formin 2 [Homo sapiens]
	KAI2573015.1 Mass: 136034 Score: 61 Matches: 1(1) Sequences: 1(1)
	inverted formin 2 [Homo sapiens]
	KAI2573016.1 Mass: 135611 Score: 61 Matches: 1(1) Sequences: 1(1)
	inverted formin 2 [Homo sapiens]
	KAI2573018.1 Mass: 132988 Score: 61 Matches: 1(1) Sequences: 1(1)
	inverted formin 2 [Homo sapiens]
	KAI2573019.1 Mass: 134610 Score: 61 Matches: 1(1) Sequences: 1(1)
	inverted formin 2 [Homo sapiens]
	KAI2573021.1 Mass: 126875 Score: 61 Matches: 1(1) Sequences: 1(1)
	inverted formin 2 [Homo sapiens]
	KAI2573022.1 Mass: 124000 Score: 61 Matches: 1(1) Sequences: 1(1)
	inverted formin 2 [Homo sapiens]
	KAI2573023.1 Mass: 114724 Score: 61 Matches: 1(1) Sequences: 1(1)
	inverted formin 2 [Homo sapiens]
	KAI2573024.1 Mass: 114370 Score: 61 Matches: 1(1) Sequences: 1(1)
	inverted formin 2 [Homo sapiens]
	KAI2573025.1 Mass: 95682 Score: 61 Matches: 1(1) Sequences: 1(1)
	inverted formin 2, partial [Homo sapiens]
	KAI2573026.1 Mass: 86038 Score: 61 Matches: 1(1) Sequences: 1(1)
	inverted formin 2 [Homo sapiens]
	KAI2573027.1 Mass: 84418 Score: 61 Matches: 1(1) Sequences: 1(1)
	inverted formin 2 [Homo sapiens]
	KAI2573028.1 Mass: 84035 Score: 61 Matches: 1(1) Sequences: 1(1)
	inverted formin 2 [Homo sapiens]
	KAI2573029.1 Mass: 81515 Score: 61 Matches: 1(1) Sequences: 1(1)
	inverted formin 2 [Homo sapiens]
	KAI2573030.1 Mass: 80519 Score: 61 Matches: 1(1) Sequences: 1(1)
	inverted formin 2 [Homo sapiens]
	KAI2573031.1 Mass: 69714 Score: 61 Matches: 1(1) Sequences: 1(1)
	inverted formin 2 [Homo sapiens]
	KAI4062642.1 Mass: 139043 Score: 61 Matches: 1(1) Sequences: 1(1)
	inverted formin 2 [Homo sapiens]
	KAI4062643.1 Mass: 114358 Score: 61 Matches: 1(1) Sequences: 1(1)
	inverted formin 2 [Homo sapiens]
	KAI4062646.1 Mass: 114712 Score: 61 Matches: 1(1) Sequences: 1(1)
	inverted formin 2 [Homo sapiens]
51.	BAH12782.1 Mass: 18712 Score: 54 Matches: 1(1) Sequences: 1(1) emPAI: 0.17
	unnamed protein product [Homo sapiens]
	Query	Observed	Mr(expt)	Mr(calc)	ppm	Miss	Score	Expect	Rank	Unique	Peptide
	5575	459.2557	916.4968	916.4978	-1.07	0	54	0.0012	1	U	K.LTQGETLR.K
	Proteins matching the same set of peptides:
	BAH13803.1 Mass: 54715 Score: 54 Matches: 1(1) Sequences: 1(1)
	unnamed protein product [Homo sapiens]
	BAH14155.1 Mass: 34512 Score: 54 Matches: 1(1) Sequences: 1(1)
	unnamed protein product [Homo sapiens]
	BAH14790.1 Mass: 54688 Score: 54 Matches: 1(1) Sequences: 1(1)
	unnamed protein product [Homo sapiens]
	NP_055577.1 Mass: 60062 Score: 54 Matches: 1(1) Sequences: 1(1)
	delta(24)-sterol reductase precursor [Homo sapiens]
	PNI71376.1 Mass: 49404 Score: 54 Matches: 1(1) Sequences: 1(1)
	DHCR24 isoform 2 [Pan troglodytes]
	KAI2517284.1 Mass: 61407 Score: 54 Matches: 1(1) Sequences: 1(1)
	24-dehydrocholesterol reductase [Homo sapiens]
52.	AAH04232.1 Mass: 61626 Score: 54 Matches: 1(1) Sequences: 1(1) emPAI: 0.05
	CAND1 protein, partial [Homo sapiens]
	Query	Observed	Mr(expt)	Mr(calc)	ppm	Miss	Score	Expect	Rank	Unique	Peptide
	6878	672.8698	1343.7251	1343.7231	1.45	0	54	0.0016	1	U	R.LSTLCPSAVLQR.L
	Proteins matching the same set of peptides:
	AAH26220.1 Mass: 128187 Score: 54 Matches: 1(1) Sequences: 1(1)
	CAND1 protein, partial [Homo sapiens]
	AAH50341.1 Mass: 136317 Score: 54 Matches: 1(1) Sequences: 1(1)
	Cullin-associated and neddylation-dissociated 1 [Homo sapiens]
	BAG50842.1 Mass: 18413 Score: 54 Matches: 1(1) Sequences: 1(1)
	unnamed protein product [Homo sapiens]
	BAG50975.1 Mass: 50836 Score: 54 Matches: 1(1) Sequences: 1(1)
	unnamed protein product [Homo sapiens]
	BAB55090.1 Mass: 100221 Score: 54 Matches: 1(1) Sequences: 1(1)
	unnamed protein product [Homo sapiens]
	CAB63714.1 Mass: 19266 Score: 54 Matches: 1(1) Sequences: 1(1)
	hypothetical protein, partial [Homo sapiens]
	BAF85145.1 Mass: 136231 Score: 54 Matches: 1(1) Sequences: 1(1)
	unnamed protein product [Homo sapiens]
	NP_446456.1 Mass: 136275 Score: 54 Matches: 1(1) Sequences: 1(1)
	cullin-associated NEDD8-dissociated protein 1 [Rattus norvegicus]
	NP_001094643.1 Mass: 136289 Score: 54 Matches: 1(1) Sequences: 1(1)
	cullin-associated NEDD8-dissociated protein 1 [Bos taurus]
	NP_001316603.1 Mass: 133529 Score: 54 Matches: 1(1) Sequences: 1(1)
	cullin-associated NEDD8-dissociated protein 1 isoform 2 [Homo sapiens]
	NP_001316605.1 Mass: 132727 Score: 54 Matches: 1(1) Sequences: 1(1)
	cullin-associated NEDD8-dissociated protein 1 isoform 3 [Homo sapiens]
	KAI2566862.1 Mass: 85355 Score: 54 Matches: 1(1) Sequences: 1(1)
	cullin associated and neddylation dissociated 1, partial [Homo sapiens]
53.	NP_005879.1 Mass: 40069 Score: 52 Matches: 1(1) Sequences: 1(1) emPAI: 0.08
	phosphate carrier protein, mitochondrial isoform a precursor [Homo sapiens]
	Query	Observed	Mr(expt)	Mr(calc)	ppm	Miss	Score	Expect	Rank	Unique	Peptide
	6903	681.3621	1360.7096	1360.7099	-0.24	0	52	0.0025	1	U	R.IQTQPGYANTLR.D
	Proteins matching the same set of peptides:
	BAC11187.1 Mass: 39907 Score: 52 Matches: 1(1) Sequences: 1(1)
	unnamed protein product [Homo sapiens]
	AAH15379.2 Mass: 39802 Score: 52 Matches: 1(1) Sequences: 1(1)
	SLC25A3 protein, partial [Homo sapiens]
	BAG38185.1 Mass: 39923 Score: 52 Matches: 1(1) Sequences: 1(1)
	unnamed protein product [Homo sapiens]
	BAD96378.1 Mass: 39903 Score: 52 Matches: 1(1) Sequences: 1(1)
	solute carrier family 25 member 3 isoform b precursor variant, partial [Homo sapiens]
	EAW97600.1 Mass: 26014 Score: 52 Matches: 1(1) Sequences: 1(1)
	solute carrier family 25 (mitochondrial carrier; phosphate carrier), member 3, isoform CRA_c [Homo sapiens]
	NP_001233352.1 Mass: 39933 Score: 52 Matches: 1(1) Sequences: 1(1)
	phosphate carrier protein, mitochondrial [Pan troglodytes]
	KAI2567471.1 Mass: 36138 Score: 52 Matches: 1(1) Sequences: 1(1)
	solute carrier family 25 member 3 [Homo sapiens]
54.	NP_000005.3 Mass: 163188 Score: 50 Matches: 1(1) Sequences: 1(1) emPAI: 0.02
	alpha-2-macroglobulin isoform a precursor [Homo sapiens]
	Query	Observed	Mr(expt)	Mr(calc)	ppm	Miss	Score	Expect	Rank	Unique	Peptide
	6744	636.8398	1271.6651	1271.6656	-0.37	0	50	0.0034	1	U	R.VTAAPQSVCALR.A
	Proteins matching the same set of peptides:
	AAT02228.1 Mass: 166022 Score: 50 Matches: 1(1) Sequences: 1(1)
	alpha 2 macroglobulin [Homo sapiens]
	CAH18188.1 Mass: 163207 Score: 50 Matches: 1(1) Sequences: 1(1)
	hypothetical protein [Homo sapiens]
	QUD18300.1 Mass: 5213 Score: 50 Matches: 1(1) Sequences: 1(1)
	alpha-2-macroglobulin, partial [Homo sapiens]
	AAA51551.1 Mass: 163175 Score: 50 Matches: 1(1) Sequences: 1(1)
	alpha-2-macroglobulin precursor [Homo sapiens]
	AKI71293.1 Mass: 163189 Score: 50 Matches: 1(1) Sequences: 1(1)
	A2M, partial [synthetic construct]
	BAD92851.1 Mass: 164030 Score: 50 Matches: 1(1) Sequences: 1(1)
	alpha 2 macroglobulin variant, partial [Homo sapiens]
	NP_001334353.2 Mass: 152403 Score: 50 Matches: 1(1) Sequences: 1(1)
	alpha-2-macroglobulin isoform b [Homo sapiens]
	NP_001334354.2 Mass: 146660 Score: 50 Matches: 1(1) Sequences: 1(1)
	alpha-2-macroglobulin isoform c [Homo sapiens]
	XP_006719119.1 Mass: 167374 Score: 50 Matches: 1(1) Sequences: 1(1)
	alpha-2-macroglobulin isoform X1 [Homo sapiens]
55.	NP_002430.3 Mass: 127332 Score: 48 Matches: 1(1) Sequences: 1(1) emPAI: 0.02
	DNA mismatch repair protein Msh3 [Homo sapiens]
	Query	Observed	Mr(expt)	Mr(calc)	ppm	Miss	Score	Expect	Rank	Unique	Peptide
	5362	435.7557	869.4969	869.4970	-0.13	1	48	0.0016	1	U	R.KLPDIER.G
	Proteins matching the same set of peptides:
	AAB06045.1 Mass: 126655 Score: 48 Matches: 1(1) Sequences: 1(1)
	hMSH3 [Homo sapiens]
	AAH11817.1 Mass: 95371 Score: 48 Matches: 1(1) Sequences: 1(1)
	MSH3 protein, partial [Homo sapiens]
	AAP13535.1 Mass: 127589 Score: 48 Matches: 1(1) Sequences: 1(1)
[truncated: 313 more rows]

## Sheet: 3
Database : NCBIprot 20220703 (490684465 sequences; 189905115401 residues)
Taxonomy : Homo sapiens (human) (438061 sequences)
Enzyme : Trypsin
Variable modifications : Acetyl (Protein N-term),Oxidation (M),Gln->pyro-Glu (N-term Q),Carbamidomethyl (C)
Mass values : Monoisotopic
Protein Mass : Unrestricted
Peptide Mass Tolerance : ± 15 ppm
Fragment Mass Tolerance: ± 30 mmu
Max Missed Cleavages : 3
Instrument type : ESI-TRAP
Number of queries : 8118
Protein hits :	BAF82705.1	unnamed protein product [Homo sapiens]
	NP_006286.1	valine--tRNA ligase [Homo sapiens]
	AAH12808.1	Valyl-tRNA synthetase [Homo sapiens]
	AAA36760.1	tripeptidyl peptidase II [Homo sapiens]
	AAA73576.1	fatty acid synthase [Homo sapiens]
	NP_002516.2	nardilysin isoform a [Homo sapiens]
	AAI50207.1	5-oxoprolinase (ATP-hydrolysing) [Homo sapiens]
	AAI44164.1	SMC2 protein [Homo sapiens]
	AHW56459.1	cytoplasmic FMR1 interacting protein 1 isoform A, partial [Homo sapiens]
	AAG41947.1	keratin 1 [Homo sapiens]
	NP_003461.2	ubiquitin carboxyl-terminal hydrolase 7 isoform 1 [Homo sapiens]
	BAF98736.1	unnamed protein product [Homo sapiens]
	AAH11762.1	Cytoplasmic FMR1 interacting protein 2 [Homo sapiens]
	BAG58628.1	unnamed protein product [Homo sapiens]
	NP_004477.5	golgin subfamily A member 2 isoform 2 [Homo sapiens]
	NP_000692.2	sodium/potassium-transporting ATPase subunit alpha-1 isoform a [Homo sapiens]
	NP_001509.3	general transcription factor II-I isoform 4 [Homo sapiens]
	AAA59553.1	microtubule-associated protein 4 [Homo sapiens]
	NP_000412.4	keratin, type I cytoskeletal 10 isoform 1 [Homo sapiens]
	NP_004289.1	nuclear pore complex protein Nup155 isoform 2 [Homo sapiens]
	EAX00324.1	echinoderm microtubule associated protein like 4 [Homo sapiens]
	NP_000929.1	DNA-directed RNA polymerase II subunit RPB2 isoform 1 [Homo sapiens]
	NP_001035700.1	elongation factor-like GTPase 1 isoform 2 [Homo sapiens]
	NP_001348.2	ATP-dependent RNA helicase A [Homo sapiens]
	CAA40655.1	pm5 protein [Homo sapiens]
	NP_000217.2	keratin, type I cytoskeletal 9 [Homo sapiens]
	AAC35008.1	cellular apoptosis susceptibility protein [Homo sapiens]
	AAH00401.2	SF3B2 protein, partial [Homo sapiens]
	EAX02046.1	polymerase (DNA directed), gamma, isoform CRA_b [Homo sapiens]
	NP_001952.1	elongation factor 2 [Homo sapiens]
	BAA32301.2	KIAA0456 protein [Homo sapiens]
	CAE45852.1	hypothetical protein [Homo sapiens]
	NP_006333.1	transforming acidic coiled-coil-containing protein 3 [Homo sapiens]
	CAH18695.1	hypothetical protein [Homo sapiens]
	NP_005947.3	C-1-tetrahydrofolate synthase, cytoplasmic isoform 1 [Homo sapiens]
	NP_006199.2	ectonucleotide pyrophosphatase/phosphodiesterase family member 1 [Homo sapiens]
	NP_004981.2	methionine--tRNA ligase, cytoplasmic [Homo sapiens]
	BAH13678.1	unnamed protein product [Homo sapiens]
	AAA31004.1	Na+, K+ -ATPase alpha subunit, partial [Sus scrofa]
	EAW58475.1	hCG1811260, isoform CRA_a [Homo sapiens]
	NP_005981.3	serine/threonine-protein kinase 10 [Homo sapiens]
	NP_000414.2	keratin, type II cytoskeletal 2 epidermal [Homo sapiens]
	BAF82693.1	unnamed protein product [Homo sapiens]
	NP_001035887.1	monocarboxylate transporter 4 [Homo sapiens]
	NP_002201.2	integrin alpha-V isoform 1 preproprotein [Homo sapiens]
	Q5VTE0.1	PUTATIVE PSEUDOGENE: RecName: Full=Putative elongation factor 1-alpha-like 3; Short=EF-1-alpha-like 3; AltName: Full=Eukaryotic elongation factor 1 A-like 3; Short=eEF1A-like 3; AltName: Full=Eukaryotic translation elongation factor 1 alpha-1 pseudo
	NP_000468.1	albumin preproprotein [Homo sapiens]
	NP_055448.1	RNA polymerase-associated protein CTR9 homolog isoform 1 [Homo sapiens]
	EAX04206.1	exportin 5, isoform CRA_a [Homo sapiens]
	NP_004475.1	glypican-3 isoform 2 precursor [Homo sapiens]
	NP_001546.2	immunoglobulin superfamily member 1 isoform 1 precursor [Homo sapiens]
	BAB55198.1	unnamed protein product [Homo sapiens]
	CAD39009.3	hypothetical protein, partial [Homo sapiens]
	CAD38866.1	hypothetical protein [Homo sapiens]
	NP_006507.2	solute carrier family 2, facilitated glucose transporter member 1 [Homo sapiens]
	NP_001667.4	potassium-transporting ATPase alpha chain 2 isoform 2 [Homo sapiens]
	NP_000087.2	ceruloplasmin precursor [Homo sapiens]
	AAH00062.1	Solute carrier family 1 (neutral amino acid transporter), member 5 [Homo sapiens]
	AAH01090.2	MICAL-L1 protein, partial [Homo sapiens]
	NP_006039.2	ubiquitin conjugation factor E4 B isoform 2 [Homo sapiens]
	NP_002363.2	alpha-mannosidase 2 [Homo sapiens]
	NP_000283.1	phosphorylase b kinase regulatory subunit alpha, liver isoform [Homo sapiens]
	NP_000518.1	low-density lipoprotein receptor isoform 1 precursor [Homo sapiens]
	NP_005026.3	DNA-directed RNA polymerase, mitochondrial isoform 5 precursor [Homo sapiens]
	ELV10669.1	Tubulin alpha-4A chain, partial [Tupaia chinensis]
	EAX01239.1	cadherin 2, type 1, N-cadherin (neuronal), isoform CRA_a [Homo sapiens]
	BAF85089.1	unnamed protein product [Homo sapiens]
	NP_002256.2	importin subunit beta-1 isoform 1 [Homo sapiens]
	AAD41240.1	beta-cop homolog [Homo sapiens]
	AAC12954.1	Proline-rich protein; weakly similar to Q14149 (PID:g2495706) and A43427 (PID:g284667), partial [Homo sapiens]
	AAH03419.1	Sf3b1 protein, partial [Mus musculus]
	CAH10518.1	hypothetical protein [Homo sapiens]
	CAD38783.1	hypothetical protein, partial [Homo sapiens]
	Q9UKV3.2	RecName: Full=Apoptotic chromatin condensation inducer in the nucleus; Short=Acinus [Homo sapiens]
	NP_005879.1	phosphate carrier protein, mitochondrial isoform a precursor [Homo sapiens]
	AAC50723.1	transportin [Homo sapiens]
	EAX07632.1	pumilio homolog 1 (Drosophila), isoform CRA_c [Homo sapiens]
	NP_009176.2	ataxin-2-like protein isoform 1 [Homo sapiens]
	AAH02575.2	DHX37 protein, partial [Homo sapiens]
	AAI37478.1	Adenosine deaminase, RNA-specific, B2 (RED2 homolog rat) [Homo sapiens]
	BAS02858.1	T cell receptor alpha chain V-J-region, partial [Homo sapiens]
	AAH02692.1	MMS19 protein, partial [Homo sapiens]
	AAA36751.1	ADP.ATP translocase, partial [Homo sapiens]
	NP_000436.2	plectin isoform 1c [Homo sapiens]
	EAX05861.1	hypothetical protein MGC35043, isoform CRA_a [Homo sapiens]
	BAH02285.1	retinoid-related orphan receptor alpha [Homo sapiens]
	NP_005532.2	phosphatidylinositol 3,4,5-trisphosphate 5-phosphatase 1 isoform b [Homo sapiens]
	AAI27106.1	Phosphoinositide-3-kinase, regulatory subunit 4 [Homo sapiens]
	Q6RVD6.1	RecName: Full=Spermatogenesis-associated protein 8; AltName: Full=Spermatogenesis-related protein 8 [Homo sapiens]
	AAG01393.1	LENG1 protein, partial [Homo sapiens]
	BAG64595.1	unnamed protein product [Homo sapiens]
	AAH02343.3	NCL protein [Homo sapiens]
	EAW78864.1	hCG1803240 [Homo sapiens]
	EAW87199.1	hCG1642481, partial [Homo sapiens]
1.	BAF82705.1 Mass: 157775 Score: 3851 Matches: 94(94) Sequences: 68(68) emPAI: 2.89
	unnamed protein product [Homo sapiens]
	Query	Observed	Mr(expt)	Mr(calc)	ppm	Miss	Score	Expect	Rank	Unique	Peptide
	4680	381.2235	760.4325	760.4331	-0.78	0	(40)	0.011	1	U	K.EAVTTLK.T
	4681	761.4416	760.4344	760.4331	1.73	0	54	0.00058	1	U	K.EAVTTLK.T
	4927	803.4054	802.3981	802.3973	0.98	0	42	0.0078	1	U	R.ADAVWNK.I
	5028	414.2218	826.4291	826.4297	-0.70	0	46	0.0033	1	U	K.AENQPIR.D
	5035	827.5350	826.5277	826.5276	0.11	0	(33)	0.029	1	U	R.LLAEILR.E
	5036	414.2711	826.5277	826.5276	0.18	0	38	0.011	1	U	R.LLAEILR.E 5034
	5051	415.7530	829.4915	829.4909	0.77	0	37	0.048	1	U	K.LVELTQK.L
	5078	418.2206	834.4267	834.4269	-0.22	0	41	0.017	1	U	K.ISIMAER.L
	5140	421.7750	841.5354	841.5385	-3.76	0	35	0.035	1	U	R.LIITQVR.R
	5160	422.7603	843.5060	843.5065	-0.64	1	43	0.01	1	U	K.EKDVLIK.D
	5237	432.2471	862.4797	862.4800	-0.35	0	44	0.0067	1	U	K.LDDLFLK.R
	5371	445.2625	888.5103	888.5103	0.11	0	37	0.043	1	U	R.VIQALAMK.G
	5394	446.7665	891.5185	891.5178	0.83	0	54	0.00051	1	U	R.SSLLLGFR.R
	5414	449.7715	897.5284	897.5284	0.06	0	38	0.016	1	U	K.IIETPGIR.A
	5503	456.2054	910.3961	910.3967	-0.62	0	39	0.012	1	U	K.VFNDTCR.S
	5868	500.7474	999.4803	999.4807	-0.48	0	44	0.0053	1	U	K.SELHLMDR.D
	5927	506.2772	1010.5398	1010.5396	0.18	0	39	0.021	1	U	K.DAHLLVESK.N
	5985	513.2696	1024.5247	1024.5229	1.76	0	53	0.0013	1	U	K.FSPTDFLAK.M
	5997	513.8186	1025.6226	1025.6233	-0.64	1	40	0.0084	1	U	K.KIIETPGIR.A
	5998	342.8822	1025.6248	1025.6233	1.43	1	(34)	0.032	1	U	K.KIIETPGIR.A
	6003	514.3115	1026.6084	1026.6073	1.03	0	52	0.0013	1	U	K.LQDAINILK.E
	6134	528.7714	1055.5283	1055.5287	-0.42	0	42	0.013	1	U	K.VYLQNEYK.F
	6276	542.7532	1083.4918	1083.4906	1.08	0	50	0.0013	1	U	K.EEAYNSLMK.S
	6328	1097.5952	1096.5879	1096.5876	0.26	0	(37)	0.044	1	U	K.IQEENVIPR.E
	6329	549.3016	1096.5886	1096.5876	0.86	0	58	0.00033	1	U	K.IQEENVIPR.E
	6347	552.2922	1102.5699	1102.5692	0.63	0	54	0.0014	1	U	R.SCGSLLPELK.L
	6349	1105.5734	1104.5661	1104.5663	-0.17	0	(53)	0.0016	1	U	R.LDSSAVLDTGK.Y
	6350	553.2905	1104.5664	1104.5663	0.11	0	68	4.9e-005	1	U	R.LDSSAVLDTGK.Y 6351
	6368	556.2931	1110.5717	1110.5709	0.73	0	45	0.012	1	U	K.GAYDIFLNAK.E
	6417	563.8454	1125.6762	1125.6757	0.46	0	37	0.019	1	U	K.NVQGIIEILK.G
	6548	583.2826	1164.5506	1164.5523	-1.47	0	62	0.00014	1	U	K.GFTLNDAANSR.L
	6685	609.2826	1216.5507	1216.5506	0.12	0	65	4.2e-005	1	U	K.MEEANIQPNR.V
	6718	615.3240	1228.6334	1228.6299	2.82	0	74	9.8e-006	1	U	K.GDVENIEVVQK.M
	6746	620.3404	1238.6662	1238.6659	0.27	1	78	3.4e-006	1	U	K.KGAYDIFLNAK.E
	6839	636.8312	1271.6479	1271.6470	0.74	0	67	5.2e-005	1	U	K.TVLDQQQTPSR.L 6838
	6857	641.3438	1280.6729	1280.6724	0.40	1	76	5.8e-006	1	U	R.HDKVEDALNLK.E
	6858	427.8983	1280.6731	1280.6724	0.54	1	(52)	0.0014	1	U	R.HDKVEDALNLK.E
	6885	649.7966	1297.5787	1297.5786	0.07	0	63	8e-005	1	U	K.DIQEESTFSSR.K
	6920	655.8719	1309.7293	1309.7282	0.89	0	47	0.0034	1	U	R.DLLQIIFSFSK.A
	6963	664.8826	1327.7507	1327.7459	3.59	0	64	0.00013	1	U	K.SNTLPISLQSIR.S
	7009	675.8963	1349.7780	1349.7779	0.09	0	88	1.5e-007	1	U	R.SGGLGGSHALLLLR.S
	7010	450.9335	1349.7787	1349.7779	0.55	0	(57)	0.0002	1	U	R.SGGLGGSHALLLLR.S 7011
	7045	458.2611	1371.7615	1371.7609	0.42	1	48	0.0044	1	U	K.LVEKGETDLIQK.A
	7070	692.3718	1382.7290	1382.7293	-0.21	0	75	7.6e-006	1	U	K.VIEEQLEPAVEK.I
	7071	692.3921	1382.7696	1382.7657	2.87	0	72	1.2e-005	1	U	K.SVLELIPELNEK.E
	7098	696.8563	1391.6980	1391.6966	0.98	0	88	4.7e-007	1	U	K.MLNGLEDSIGLSK.M
	7104	698.8378	1395.6610	1395.6605	0.34	0	53	0.0012	1	U	K.ISNQFDWALMR.L
	7119	702.8433	1403.6720	1403.6715	0.36	0	66	6.4e-005	1	U	R.CVANNQVETLEK.L
	7285	745.9243	1489.8340	1489.8326	0.89	0	66	4.4e-005	1	U	K.MVFINNIALAQIK.N
	7294	748.8863	1495.7581	1495.7558	1.55	0	50	0.003	1	U	K.AGYPQYVSEILEK.V
	7315	504.6157	1510.8252	1510.8242	0.67	1	(60)	0.00027	1	U	R.KVIEEQLEPAVEK.I
	7316	756.4201	1510.8256	1510.8242	0.94	1	101	1.9e-008	1	U	R.KVIEEQLEPAVEK.I
	7377	777.9307	1553.8469	1553.8453	1.03	0	47	0.0051	1	U	R.NLLESYHVPELIK.D
	7378	518.9573	1553.8500	1553.8453	3.03	0	(39)	0.037	1	U	R.NLLESYHVPELIK.D
	7379	778.3655	1554.7165	1554.7162	0.24	1	71	2e-005	1	U	K.EKDIQEESTFSSR.K
	7380	519.2477	1554.7212	1554.7162	3.25	1	(45)	0.0068	1	U	K.EKDIQEESTFSSR.K
	7423	572.6437	1714.9092	1714.9083	0.55	0	(58)	0.00064	1	U	K.VIEPQYFGLAYLFR.K
	7424	858.4619	1714.9093	1714.9083	0.59	0	77	7.5e-006	1	U	K.VIEPQYFGLAYLFR.K
	7428	860.9343	1719.8540	1719.8535	0.27	0	64	0.00015	1	U	K.QLILVLCSEENMQK.A
	7453	884.9979	1767.9812	1767.9804	0.41	0	45	0.0057	1	U	K.LEDVALQILLACPVSK.E
	7481	612.6185	1834.8338	1834.8333	0.24	0	47	0.0048	1	U	K.HSLNSSSASTTEPDFQK.D
	7508	627.6481	1879.9226	1879.9251	-1.33	0	48	0.0054	1	U	K.DTTALSFFHMLNGAALR.G
	7509	941.9816	1881.9486	1881.9472	0.73	0	79	4.2e-006	1	U	K.EQNIVFNAETYSNLIK.L
	7510	628.3238	1881.9495	1881.9472	1.24	0	(44)	0.015	1	U	K.EQNIVFNAETYSNLIK.L
	7511	628.3394	1881.9963	1881.9949	0.73	0	(77)	5.7e-006	1	U	K.DLPVTEAVFSALVTGHAR.A
	7512	942.0057	1881.9969	1881.9949	1.09	0	93	1.4e-007	1	U	K.DLPVTEAVFSALVTGHAR.A
	7537	643.3731	1927.0975	1927.0965	0.54	0	(46)	0.0031	1	U	R.CGAIAEQTPILLLFLLR.N
	7538	964.5566	1927.0986	1927.0965	1.11	0	72	9.3e-006	1	U	R.CGAIAEQTPILLLFLLR.N
	7546	977.5048	1952.9950	1952.9917	1.67	0	80	3.5e-006	1	U	R.SMNINLWSEITELLYK.D
	7550	653.3262	1956.9569	1956.9541	1.42	2	105	1.2e-008	1	U	R.HDKVEDALNLKEEFDR.L
	7551	490.2474	1956.9605	1956.9541	3.30	2	(71)	2.7e-005	1	U	R.HDKVEDALNLKEEFDR.L
	7661	1096.9933	2191.9720	2191.9700	0.91	0	(96)	4.9e-008	1	U	K.YESDMVTGGYAALINLCCR.H
	7670	1104.9912	2207.9679	2207.9650	1.32	0	136	2.9e-012	1	U	K.YESDMVTGGYAALINLCCR.H
	7695	1111.0568	2220.0990	2220.0950	1.79	0	125	1.3e-010	1	U	R.DAGIEPGPDTYLALLNAYAEK.G
	7696	741.0414	2220.1023	2220.0950	3.30	0	(105)	1.5e-008	1	U	R.DAGIEPGPDTYLALLNAYAEK.G
	7729	755.0218	2262.0437	2262.0433	0.17	0	(70)	2.7e-005	1	U	K.NNNIDAAIENIENMLTSENK.V
	7730	1132.0300	2262.0455	2262.0433	0.96	0	99	3.8e-008	1	U	K.NNNIDAAIENIENMLTSENK.V
	7781	1162.0247	2322.0348	2322.0328	0.84	0	45	0.0053	1	U	R.EGNQEVPFDVPELWYEDEK.H
	7785	776.6918	2327.0535	2327.0522	0.56	0	(68)	3e-005	1	U	R.AILQENGCLSDSDMFSQAGLR.S
	7786	1164.5350	2327.0555	2327.0522	1.43	0	103	1.1e-008	1	U	R.AILQENGCLSDSDMFSQAGLR.S
	7855	822.4213	2464.2422	2464.2406	0.62	1	44	0.026	1	U	K.SVLELIPELNEKEEAYNSLMK.S
	7903	866.8096	2597.4071	2597.3894	6.82	0	95	8.1e-008	1	U	R.LANQFAIYKPVTDFFLQLVDAGK.V
	7935	905.4426	2713.3061	2713.3064	-0.12	0	(73)	2.2e-005	1	U	K.YAGEPVPFIEPPESFEFYAQQLR.K
	7936	1357.6625	2713.3104	2713.3064	1.48	0	76	1.2e-005	1	U	K.YAGEPVPFIEPPESFEFYAQQLR.K
	7945	914.7574	2741.2503	2741.2466	1.37	0	38	0.037	1	U	K.EDGPSVFGSFFLQHCVTMNTPVEK.L
	7949	917.4351	2749.2835	2749.2793	1.55	0	78	5.3e-006	1	U	R.GPTEAVGYFLYNLIDSMSDSEVQAK.E
	8014	1052.9136	3155.7189	3155.7230	-1.32	0	86	3.5e-007	1	U	K.QLHEAIVTLGLAEPSTNISFPLVTVHLEK.G
	8015	789.9379	3155.7226	3155.7230	-0.13	0	(62)	7.3e-005	1	U	K.QLHEAIVTLGLAEPSTNISFPLVTVHLEK.G
	8033	1110.1697	3327.4872	3327.4813	1.79	0	70	1.9e-005	1	U	K.GMQELGVHPDQETYTDYVIPCFDSVNSAR.A
	8038	1115.5013	3343.4822	3343.4762	1.80	0	(61)	0.00015	1	U	K.GMQELGVHPDQETYTDYVIPCFDSVNSAR.A
	Proteins matching the same set of peptides:
	NP_573566.2 Mass: 157805 Score: 3851 Matches: 94(94) Sequences: 68(68)
	leucine-rich PPR motif-containing protein, mitochondrial precursor [Homo sapiens]
	XP_006711978.1 Mass: 155195 Score: 3851 Matches: 94(94) Sequences: 68(68)
	leucine-rich PPR motif-containing protein, mitochondrial isoform X1 [Homo sapiens]
	XP_047298765.1 Mass: 153607 Score: 3851 Matches: 94(94) Sequences: 68(68)
	leucine-rich PPR motif-containing protein, mitochondrial isoform X2 [Homo sapiens]
2.	NP_006286.1 Mass: 140387 Score: 1449 Matches: 35(35) Sequences: 33(33) emPAI: 1.10
	valine--tRNA ligase [Homo sapiens]
	Query	Observed	Mr(expt)	Mr(calc)	ppm	Miss	Score	Expect	Rank	Unique	Peptide
	4444	357.2495	712.4845	712.4847	-0.32	0	32	0.0017	1		K.AVLVALK.E
	4882	396.7159	791.4173	791.4177	-0.60	0	52	0.00071	1		R.AASGYPVK.V
	4966	406.2264	810.4383	810.4388	-0.62	0	33	0.038	1	U	R.TPFPPPR.L
	5105	421.2969	840.5792	840.5797	-0.53	1	62	1.6e-005	1		R.KAVLVALK.E
	5185	426.7140	851.4134	851.4137	-0.33	0	60	0.00018	1		R.ADYNLTR.I
	5330	439.7163	877.4181	877.4182	-0.10	0	41	0.013	1		K.EFGVSPDK.I
	5718	482.2724	962.5302	962.5297	0.53	0	41	0.025	1		R.ILPEAHQR.T
	5803	493.2091	984.4036	984.4045	-0.90	0	29	0.044	1		R.ACFTMDPK.L
	6104	524.7570	1047.4995	1047.4985	0.92	0	70	2.3e-005	1		K.LGSSLDWDR.A
	6291	544.2905	1086.5664	1086.5669	-0.48	0	55	0.00092	1		K.LQQTEAELR.K
	6335	550.3172	1098.6198	1098.6186	1.17	0	50	0.0019	1		R.EVYLHAIVR.D
	6484	575.3010	1148.5875	1148.5866	0.80	0	67	6.6e-005	1		R.EAFLQEVWK.W
	6543	582.3253	1162.6360	1162.6346	1.17	0	69	3.4e-005	1		K.LSAAVTEAFVR.L
	6676	607.3326	1212.6507	1212.6502	0.40	0	59	0.00034	1		R.ALSPLEEWLR.L
	6807	631.3613	1260.7081	1260.7078	0.27	1	65	6.7e-005	1		R.KVDEAIALFQK.M
	6957	664.3411	1326.6676	1326.6667	0.66	0	84	1e-006	1		K.VPLEVQEADEAK.L
	6993	449.2076	1344.6010	1344.6033	-1.73	0	41	0.0079	1		R.TWHAWMDNIR.E
	7128	704.3142	1406.6139	1406.6136	0.17	0	73	4.7e-006	1		K.DVSGPMPDSYSPR.Y
	7162	712.3116	1422.6087	1422.6086	0.14	0	(60)	8.8e-005	1		K.DVSGPMPDSYSPR.Y
	7194	719.8249	1437.6352	1437.6340	0.83	0	112	7.8e-010	1		R.CGEMAQAASAAVTR.G
	7196	719.8727	1437.7309	1437.7286	1.61	0	83	1.6e-006	1		R.QTLYTCLDVGLR.L
	7252	735.3914	1468.7682	1468.7634	3.25	0	79	3.3e-006	1		R.SSAQDPQAVLGALGR.A
	7369	517.9085	1550.7035	1550.7035	0.01	1	46	0.005	1		K.KDVSGPMPDSYSPR.Y
	7395	799.3608	1596.7071	1596.7070	0.11	0	112	8.4e-010	1		R.YGEAGEGPGWGGAHPR.I
	7396	807.3912	1612.7678	1612.7701	-1.46	0	46	0.0056	1		R.GIEDNPMVVPLCNR.S
	7414	845.3973	1688.7801	1688.7828	-1.60	0	45	0.0086	1		K.ADFPAGIPECGTDALR.F
	7416	849.9339	1697.8532	1697.8512	1.19	0	73	1.5e-005	1		R.DPGVITYDLPTPPGEK.K
	7418	569.6391	1705.8955	1705.8934	1.23	0	67	5.7e-005	1		R.CSIHLQLQGLVDPAR.E
	7477	914.9661	1827.9177	1827.9155	1.18	0	68	5.6e-005	1		M.STLYVSPHPDAFPSLR.A
	7561	983.9864	1965.9583	1965.9545	1.97	0	96	8.2e-008	1		K.GFVPSPTSQPGGHESLVDR.W
	7562	656.3268	1965.9587	1965.9545	2.14	0	(67)	7.1e-005	1		K.GFVPSPTSQPGGHESLVDR.W
	7567	985.5097	1969.0048	1969.0019	1.49	0	42	0.025	1		R.LLSPFMPFVTEELFQR.L
	7771	1150.0675	2298.1204	2298.1169	1.56	0	80	3.8e-006	1		R.IPAYFVTVSDPAVPPGEDPDGR.Y
	7944	913.1824	2736.5253	2736.5214	1.42	0	58	0.00016	1		R.LHTYLAGEAPTLADLAAVTALLLPFR.Y
	8029	1085.5812	3253.7217	3253.7169	1.48	0	50	0.0038	1		R.AAVLVQQWVSYADTELIPAACGATLPALGLR.S
	Proteins matching the same set of peptides:
	AQY77380.2 Mass: 140403 Score: 1449 Matches: 35(35) Sequences: 33(33)
	VARS [Homo sapiens]
	AQY77383.2 Mass: 140334 Score: 1449 Matches: 35(35) Sequences: 33(33)
	VARS [Homo sapiens]
	AQY77385.2 Mass: 140377 Score: 1449 Matches: 35(35) Sequences: 33(33)
	VARS [Homo sapiens]
	AQY77388.2 Mass: 140334 Score: 1449 Matches: 35(35) Sequences: 33(33)
	VARS [Homo sapiens]
	XP_005249419.1 Mass: 140515 Score: 1449 Matches: 35(35) Sequences: 33(33)
	valine--tRNA ligase isoform X1 [Homo sapiens]
3.	AAH12808.1 Mass: 140377 Score: 1443 Matches: 35(35) Sequences: 33(33) emPAI: 1.10
	Valyl-tRNA synthetase [Homo sapiens]
	Query	Observed	Mr(expt)	Mr(calc)	ppm	Miss	Score	Expect	Rank	Unique	Peptide
	4444	357.2495	712.4845	712.4847	-0.32	0	32	0.0017	1		K.AVLVALK.E
	4882	396.7159	791.4173	791.4177	-0.60	0	52	0.00071	1		R.AASGYPVK.V
	4918	401.2154	800.4163	800.4181	-2.25	0	43	0.0045	1	U	R.TSFPPPR.L
	5105	421.2969	840.5792	840.5797	-0.53	1	62	1.6e-005	1		R.KAVLVALK.E
	5185	426.7140	851.4134	851.4137	-0.33	0	60	0.00018	1		R.ADYNLTR.I
	5330	439.7163	877.4181	877.4182	-0.10	0	41	0.013	1		K.EFGVSPDK.I
	5718	482.2724	962.5302	962.5297	0.53	0	41	0.025	1		R.ILPEAHQR.T
	5803	493.2091	984.4036	984.4045	-0.90	0	29	0.044	1		R.ACFTMDPK.L
	6104	524.7570	1047.4995	1047.4985	0.92	0	70	2.3e-005	1		K.LGSSLDWDR.A
	6291	544.2905	1086.5664	1086.5669	-0.48	0	55	0.00092	1		K.LQQTEAELR.K
	6335	550.3172	1098.6198	1098.6186	1.17	0	50	0.0019	1		R.EVYLHAIVR.D
	6484	575.3010	1148.5875	1148.5866	0.80	0	67	6.6e-005	1		R.EAFLQEVWK.W
	6543	582.3253	1162.6360	1162.6346	1.17	0	69	3.4e-005	1		K.LSAAVTEAFVR.L
	6676	607.3326	1212.6507	1212.6502	0.40	0	59	0.00034	1		R.ALSPLEEWLR.L
	6807	631.3613	1260.7081	1260.7078	0.27	1	65	6.7e-005	1		R.KVDEAIALFQK.M
	6957	664.3411	1326.6676	1326.6667	0.66	0	84	1e-006	1		K.VPLEVQEADEAK.L
	6993	449.2076	1344.6010	1344.6033	-1.73	0	41	0.0079	1		R.TWHAWMDNIR.E
	7128	704.3142	1406.6139	1406.6136	0.17	0	73	4.7e-006	1		K.DVSGPMPDSYSPR.Y
	7162	712.3116	1422.6087	1422.6086	0.14	0	(60)	8.8e-005	1		K.DVSGPMPDSYSPR.Y
	7194	719.8249	1437.6352	1437.6340	0.83	0	112	7.8e-010	1		R.CGEMAQAASAAVTR.G
	7196	719.8727	1437.7309	1437.7286	1.61	0	83	1.6e-006	1		R.QTLYTCLDVGLR.L
	7252	735.3914	1468.7682	1468.7634	3.25	0	79	3.3e-006	1		R.SSAQDPQAVLGALGR.A
	7369	517.9085	1550.7035	1550.7035	0.01	1	46	0.005	1		K.KDVSGPMPDSYSPR.Y
	7395	799.3608	1596.7071	1596.7070	0.11	0	112	8.4e-010	1		R.YGEAGEGPGWGGAHPR.I
	7396	807.3912	1612.7678	1612.7701	-1.46	0	46	0.0056	1		R.GIEDNPMVVPLCNR.S
	7414	845.3973	1688.7801	1688.7828	-1.60	0	45	0.0086	1		K.ADFPAGIPECGTDALR.F
	7416	849.9339	1697.8532	1697.8512	1.19	0	73	1.5e-005	1		R.DPGVITYDLPTPPGEK.K
	7418	569.6391	1705.8955	1705.8934	1.23	0	67	5.7e-005	1		R.CSIHLQLQGLVDPAR.E
	7477	914.9661	1827.9177	1827.9155	1.18	0	68	5.6e-005	1		M.STLYVSPHPDAFPSLR.A
	7561	983.9864	1965.9583	1965.9545	1.97	0	96	8.2e-008	1		K.GFVPSPTSQPGGHESLVDR.W
	7562	656.3268	1965.9587	1965.9545	2.14	0	(67)	7.1e-005	1		K.GFVPSPTSQPGGHESLVDR.W
	7567	985.5097	1969.0048	1969.0019	1.49	0	42	0.025	1		R.LLSPFMPFVTEELFQR.L
	7771	1150.0675	2298.1204	2298.1169	1.56	0	80	3.8e-006	1		R.IPAYFVTVSDPAVPPGEDPDGR.Y
	7944	913.1824	2736.5253	2736.5214	1.42	0	58	0.00016	1		R.LHTYLAGEAPTLADLAAVTALLLPFR.Y
	8029	1085.5812	3253.7217	3253.7169	1.48	0	50	0.0038	1		R.AAVLVQQWVSYADTELIPAACGATLPALGLR.S
	Proteins matching the same set of peptides:
	AQY77386.2 Mass: 140324 Score: 1443 Matches: 35(35) Sequences: 33(33)
	VARS [Homo sapiens]
4.	AAA36760.1 Mass: 138362 Score: 1404 Matches: 34(34) Sequences: 32(32) emPAI: 1.03
	tripeptidyl peptidase II [Homo sapiens]
	Query	Observed	Mr(expt)	Mr(calc)	ppm	Miss	Score	Expect	Rank	Unique	Peptide
	5163	423.2401	844.4657	844.4654	0.31	0	44	0.011	1	U	R.ALENTAVK.A
	5368	445.2310	888.4474	888.4487	-1.52	0	40	0.03	1	U	R.VALAEACR.K
	5769	490.2555	978.4964	978.4957	0.78	0	43	0.011	1	U	K.AIEFCIAR.W
	5793	491.8186	981.6227	981.6223	0.46	0	58	7.5e-005	1	U	R.VPITAVIAAK.V 5792
	5842	497.7448	993.4751	993.4767	-1.58	0	53	0.001	1	U	K.EEFTEALR.D
	5893	501.7635	1001.5125	1001.5142	-1.68	0	54	0.0012	1	U	K.DGEIVGLSGR.V
	6273	542.3013	1082.5881	1082.5873	0.76	0	48	0.0028	1	U	K.DLPFIVSHR.L
	6367	556.2643	1110.5141	1110.5128	1.21	0	62	0.00013	1	U	K.ETGAASFLCR.Y
	6414	563.7764	1125.5382	1125.5414	-2.88	0	44	0.0068	1	U	R.HEQISDLER.L
	6524	579.3021	1156.5897	1156.5877	1.75	0	62	0.00012	1	U	K.IPASWTNPSGK.Y
	6575	589.3204	1176.6263	1176.6251	1.00	0	51	0.0024	1	U	K.LGFTVTVGNNR.G
	6742	413.5546	1237.6421	1237.6415	0.48	1	47	0.0058	1	U	R.LHQLDAEKER.M
	6826	634.3726	1266.7307	1266.7296	0.88	0	49	0.0019	1	U	R.NGVAPGAQILSIK.I
	6872	645.3593	1288.7041	1288.7027	1.05	0	59	0.00031	1	U	K.GTLTEAFPVLGGK.A
	6881	647.8376	1293.6606	1293.6599	0.60	0	70	3.6e-005	1	U	R.LSTMETGTGLIR.A
	6883	648.8200	1295.6255	1295.6245	0.76	0	66	6.6e-005	1	U	K.LDSSDIYNELK.E
	6946	661.8275	1321.6403	1321.6415	-0.86	0	76	8.8e-006	1	U	K.LPANQYTWSSR.G
	6947	661.8380	1321.6615	1321.6588	2.04	0	48	0.005	1	U	K.YEDLAPCITLK.N
	6953	442.2629	1323.7670	1323.7663	0.53	1	69	1e-005	1	U	R.LKDLPFIVSHR.L
	7007	450.9016	1349.6830	1349.6827	0.25	1	54	0.0038	1	U	K.DLKEEFTEALR.D
	7008	675.8489	1349.6832	1349.6827	0.40	1	(52)	0.0059	1	U	K.DLKEEFTEALR.D
	7022	680.8503	1359.6860	1359.6857	0.26	0	72	1.8e-005	1	U	R.ICEVINEAVWK.H
	7093	463.5687	1387.6844	1387.6844	-0.04	0	38	0.044	1	U	K.ANNIDYTVHSVR.R
	7107	466.9337	1397.7791	1397.7779	0.86	0	49	0.0027	1	U	K.NWVQTLRPVSAK.T
	7161	712.3038	1422.5930	1422.5933	-0.20	0	93	3.7e-008	1	U	R.ACIDSNEDGDLSK.S
	7462	896.9528	1791.8911	1791.8890	1.15	0	80	3.5e-006	1	U	K.EELQSQVELLNSFEK.K
	7501	934.4836	1866.9526	1866.9516	0.55	0	40	0.037	1	U	M.ATAATEEPFPFHGLLPK.K
	7704	742.6606	2224.9601	2224.9596	0.22	0	76	3.2e-006	1	U	K.CDLVNYSYGEATHWPNSGR.I
	7742	1137.5721	2273.1297	2273.1275	0.99	0	138	7.5e-012	1	U	K.IVDIIDTTGSGDVNTATEVEPK.D
	7850	817.3677	2449.0812	2449.0798	0.59	0	62	7.7e-005	1	U	K.YSDPGPVYDCLVWHDGEVWR.A
	7891	512.8577	2559.2520	2559.2506	0.52	0	43	0.023	1	U	K.VNESSHYDLAFTDVHFKPGQIR.R
	7895	856.0717	2565.1932	2565.1958	-1.04	0	83	2.4e-006	1	U	R.EGLHYTEVCGYDIASPNAGPLFR.V
	7991	988.1404	2961.3993	2961.3992	0.03	0	82	1.8e-006	1	U	R.DPVQVAAPSDHGVGIEPVFPENTENSEK.I
	Proteins matching the same set of peptides:
	NP_001317517.1 Mass: 139677 Score: 1404 Matches: 34(34) Sequences: 32(32)
	tripeptidyl-peptidase 2 isoform 2 [Homo sapiens]
	NP_001354876.1 Mass: 142945 Score: 1404 Matches: 34(34) Sequences: 32(32)
	tripeptidyl-peptidase 2 isoform 3 [Homo sapiens]
	NP_001359171.1 Mass: 138263 Score: 1404 Matches: 34(34) Sequences: 32(32)
	tripeptidyl-peptidase 2 [Pongo abelii]
	XP_005254127.1 Mass: 144360 Score: 1404 Matches: 34(34) Sequences: 32(32)
	tripeptidyl-peptidase 2 isoform X1 [Homo sapiens]
	XP_005586250.1 Mass: 128064 Score: 1404 Matches: 34(34) Sequences: 32(32)
	tripeptidyl-peptidase 2 isoform X5 [Macaca fascicularis]
	XP_045233282.1 Mass: 125458 Score: 1404 Matches: 34(34) Sequences: 32(32)
	tripeptidyl-peptidase 2 isoform X6 [Macaca fascicularis]
	XP_047286536.1 Mass: 124043 Score: 1404 Matches: 34(34) Sequences: 32(32)
	tripeptidyl-peptidase 2 isoform X4 [Homo sapiens]
5.	AAA73576.1 Mass: 272919 Score: 1306 Matches: 34(34) Sequences: 34(34) emPAI: 0.47
	fatty acid synthase [Homo sapiens]
	Query	Observed	Mr(expt)	Mr(calc)	ppm	Miss	Score	Expect	Rank	Unique	Peptide
	4870	395.7153	789.4160	789.4167	-0.81	0	46	0.0039	1	U	R.LLSAACR.L
	5167	423.7453	845.4760	845.4759	0.08	0	41	0.021	1	U	K.AGLYGLPR.R
	5333	440.2091	878.4036	878.4035	0.12	0	41	0.015	1	U	R.DGAWGAFR.H
	5546	461.2433	920.4720	920.4716	0.51	0	51	0.0019	1	U	R.QELSFAAR.S
	5589	466.7742	931.5338	931.5338	-0.03	1	42	0.012	1	U	R.KLQELSSK.A
	5687	478.7701	955.5257	955.5239	1.81	0	44	0.0058	1	U	K.HGLYLPTR.V
	5708	481.2690	960.5235	960.5240	-0.51	0	60	0.00026	1	U	K.TGTVSLEVR.L
	5848	498.3286	994.6426	994.6426	-0.03	0	42	0.0014	1	U	R.VLEALLPLK.G
	6043	519.7643	1037.5141	1037.5142	-0.03	0	43	0.013	1	U	K.YSGTLNLDR.V
	6044	519.7776	1037.5407	1037.5393	1.36	0	42	0.011	1	U	R.VFTTVGSAEK.R
	6047	519.8317	1037.6488	1037.6485	0.31	0	31	0.032	1	U	R.GTPLISPLIK.W
	6209	535.2671	1068.5196	1068.5200	-0.32	0	59	0.00024	1	U	R.DPSQQELPR.L
	6225	537.2730	1072.5315	1072.5302	1.23	0	55	0.00061	1	U	R.QVQPEGPYR.V
	6286	543.3140	1084.6134	1084.6128	0.52	0	38	0.038	1	U	R.QEPLLIGSTK.S
	6720	616.2610	1230.5075	1230.5088	-1.00	0	62	2.7e-005	1	U	K.AFDTAGNGYCR.S
	6752	621.3541	1240.6937	1240.6928	0.74	0	46	0.0045	1	U	R.EVWALVQAGIR.D
	6886	649.8370	1297.6594	1297.6626	-2.48	0	73	1.2e-005	1	U	K.VGDPQELNGITR.A
	6898	651.8405	1301.6663	1301.6649	1.11	0	54	0.0011	1	U	R.AALQEELQLCK.G
	6982	670.3648	1338.7151	1338.7143	0.57	0	61	0.00018	1	U	R.QQEQQVPILEK.F
	7089	694.8230	1387.6314	1387.6289	1.82	0	63	8.3e-005	1	U	K.ADEASELACPTPK.E
	7251	735.3554	1468.6963	1468.6947	1.10	0	73	1.4e-005	1	U	R.FPQLDSTSFANSR.D
	7367	775.3987	1548.7829	1548.7784	2.94	0	56	0.0013	1	U	R.AFEVSENGNLVVSGK.V
	7397	807.4163	1612.8181	1612.8169	0.75	0	80	3.2e-006	1	U	K.EDGLAQQQTQLNLR.S
	7440	581.2815	1740.8226	1740.8220	0.37	0	54	0.001	1	U	R.DTSFEQHVLWHTGGK.G
	7456	889.5024	1776.9902	1776.9873	1.64	0	82	1.1e-006	1	U	K.LPEDPLLSGLLDSPALK.A
	7516	472.7564	1886.9964	1886.9963	0.07	0	56	0.00087	1	U	R.VTVAGGVHISGLHTESAPR.R
	7531	958.9908	1915.9671	1915.9640	1.65	0	113	2e-009	1	U	K.EQGVTFPSGDIQEQLIR.S
	7625	706.3472	2116.0199	2116.0185	0.63	0	94	1.5e-007	1	U	R.GTHTGVWVGVSGSETSEALSR.D
	7660	730.0401	2187.0985	2187.0961	1.11	0	52	0.0024	1	U	R.RPTPQDSPIFLPVDDTSFR.W
	7814	790.0332	2367.0778	2367.0768	0.43	0	49	0.0031	1	U	R.GYDYGPHFQGILEASLEGDSGR.L
	7858	824.7738	2471.2996	2471.2961	1.40	0	71	2.7e-005	1	U	R.LHLSGIDANPNALFPPVEFPAPR.G
	7886	848.0754	2541.2043	2541.2023	0.78	0	90	3.7e-007	1	U	R.SLYQSAGVAPESFEYIEAHGTGTK.V
	7918	667.5932	2666.3437	2666.3340	3.63	0	43	0.023	1	U	R.HFLLEEDKPEEPTAHAFVSTLTR.G
	7969	947.4778	2839.4115	2839.4068	1.64	0	61	0.00031	1	U	R.LFDHPESPTPNPTEPLFLAQAEVYK.E
	Proteins matching the same set of peptides:
	KAI2585806.1 Mass: 273040 Score: 1306 Matches: 34(34) Sequences: 34(34)
	fatty acid synthase [Homo sapiens]
	KAI2585807.1 Mass: 273268 Score: 1306 Matches: 34(34) Sequences: 34(34)
	fatty acid synthase [Homo sapiens]
	NP_004095.4 Mass: 273254 Score: 1306 Matches: 34(34) Sequences: 34(34)
	fatty acid synthase [Homo sapiens]
	AAS09886.1 Mass: 273277 Score: 1306 Matches: 34(34) Sequences: 34(34)
	fatty acid synthase [Homo sapiens]
	AAH63242.1 Mass: 273227 Score: 1306 Matches: 34(34) Sequences: 34(34)
	Fatty acid synthase [Homo sapiens]
	EAW89745.1 Mass: 273253 Score: 1306 Matches: 34(34) Sequences: 34(34)
	fatty acid synthase [Homo sapiens]
	KAI4052325.1 Mass: 273026 Score: 1306 Matches: 34(34) Sequences: 34(34)
	fatty acid synthase [Homo sapiens]
6.	NP_002516.2 Mass: 139325 Score: 990 Matches: 27(27) Sequences: 22(22) emPAI: 0.62
	nardilysin isoform a [Homo sapiens]
	Query	Observed	Mr(expt)	Mr(calc)	ppm	Miss	Score	Expect	Rank	Unique	Peptide
	5647	474.7476	947.4806	947.4811	-0.52	0	56	0.00073	1	U	K.ETLDTLEK.W
	5667	477.2321	952.4496	952.4502	-0.63	0	51	0.0012	1	U	K.YNSEVVDK.K
	5827	495.8026	989.5907	989.5909	-0.26	0	36	0.028	1	U	R.LLILEYAR.W
	5915	504.7613	1007.5080	1007.5076	0.34	0	50	0.0022	1	U	K.SDLVNWFK.A
	5972	512.2949	1022.5753	1022.5760	-0.70	0	44	0.0061	1	U	R.LAHEIEALK.S
	5973	341.8657	1022.5753	1022.5760	-0.66	0	(40)	0.015	1	U	R.LAHEIEALK.S
	6214	536.2903	1070.5660	1070.5648	1.12	0	44	0.009	1	U	K.YIATDFTLK.A
	6263	361.1884	1080.5434	1080.5451	-1.56	1	47	0.0052	1	U	K.YNSEVVDKK.I
	6265	541.2802	1080.5457	1080.5451	0.58	1	(44)	0.01	1	U	K.YNSEVVDKK.I
	6450	570.2961	1138.5777	1138.5771	0.52	0	63	8.8e-005	1	U	R.TVFQFDVQR.K
	6576	393.2390	1176.6953	1176.6979	-2.20	0	(58)	0.00013	1	U	K.LVAGEHGLIIR.V
	6577	589.3556	1176.6966	1176.6979	-1.06	0	63	4.1e-005	1	U	K.LVAGEHGLIIR.V
	6615	596.2603	1190.5059	1190.5051	0.72	0	77	1.2e-006	1	U	R.LGADESEEEGR.R
	6626	399.2448	1194.7126	1194.7125	0.12	0	49	0.00069	1	U	R.FHLISPLIQK.S
	6627	598.3638	1194.7131	1194.7125	0.54	0	(35)	0.018	1	U	R.FHLISPLIQK.S
	6867	643.3597	1284.7049	1284.7037	0.93	0	77	1.2e-005	1	U	K.ANLVLLSGANEGK.C
	6868	643.8339	1285.6532	1285.6514	1.39	0	60	0.0003	1	U	R.GSLSNAGDPEIVK.S
	6999	449.8760	1346.6062	1346.6062	0.00	1	37	0.028	1	U	R.LGADESEEEGRR.G
	7124	703.2763	1404.5381	1404.5324	4.02	0	91	1e-008	1	U	K.HGGSDNASTDCER.T
	7125	469.1868	1404.5386	1404.5324	4.38	0	(44)	0.00054	1	U	K.HGGSDNASTDCER.T
	7143	708.3284	1414.6423	1414.6405	1.29	0	81	1.2e-006	1	U	K.YPDENGFDAFLK.K
	7225	728.3273	1454.6401	1454.6388	0.91	0	54	0.00049	1	U	K.AFDCPETEYPVK.I
	7267	739.8774	1477.7403	1477.7388	1.05	0	75	9e-006	1	U	K.IVNTPQGCLWYK.K
	7292	498.9103	1493.7092	1493.7085	0.44	0	40	0.022	1	U	K.QTLGYHVYPTCR.N
	7442	873.9004	1745.7863	1745.7857	0.39	0	69	1.9e-005	1	U	K.GDANSEVTVYYQSGTR.S
	7594	1017.5432	2033.0719	2033.0681	1.88	0	79	4.1e-006	1	U	K.IENLTEEAFNTQVTALIK.L
	7709	1117.9742	2233.9339	2233.9328	0.50	0	60	8.6e-005	1	U	K.STCSCPDLQPNGQDLGENSR.V
	Proteins matching the same set of peptides:
	AAH08775.1 Mass: 131488 Score: 990 Matches: 27(27) Sequences: 22(22)
	NRD1 protein [Homo sapiens]
	AAC39597.1 Mass: 130862 Score: 990 Matches: 27(27) Sequences: 22(22)
	NRD convertase [Homo sapiens]
	NP_001095132.1 Mass: 131618 Score: 990 Matches: 27(27) Sequences: 22(22)
	nardilysin isoform b precursor [Homo sapiens]
	KAI2517102.1 Mass: 139196 Score: 990 Matches: 27(27) Sequences: 22(22)
	nardilysin convertase [Homo sapiens]
7.	AAI50207.1 Mass: 137343 Score: 955 Matches: 20(20) Sequences: 17(17) emPAI: 0.46
	5-oxoprolinase (ATP-hydrolysing) [Homo sapiens]
	Query	Observed	Mr(expt)	Mr(calc)	ppm	Miss	Score	Expect	Rank	Unique	Peptide
	4730	386.2586	770.5026	770.5014	1.54	0	51	0.00019	1	U	R.VALLVTR.G
	4908	399.7637	797.5128	797.5123	0.61	0	40	0.0056	1	U	R.GLNLLIR.K
	5531	458.7404	915.4662	915.4662	0.06	0	48	0.004	1	U	R.GEAGTGTPVK.G
	6448	570.2783	1138.5420	1138.5407	1.09	0	92	1.2e-007	1	U	R.AGDFGAAFVER.Y
	6565	586.8121	1171.6096	1171.6084	0.98	0	61	0.00022	1	U	R.ITDPEILESR.Y
	6629	399.5387	1195.5944	1195.5945	-0.14	0	(42)	0.016	1	U	R.NLHDNLSDLR.A
	6630	598.8049	1195.5953	1195.5945	0.65	0	43	0.013	1	U	R.NLHDNLSDLR.A
	7082	693.3771	1384.7397	1384.7384	0.96	0	81	3.2e-006	1	U	R.ILEQEAGMLLPR.D
	7099	696.8621	1391.7096	1391.7079	1.23	0	108	5.8e-009	1	U	R.MGTTVATNALLER.K
	7145	473.2530	1416.7371	1416.7361	0.72	0	(59)	0.00044	1	U	R.SQISTESFLHLR.Y
	7146	709.3770	1416.7395	1416.7361	2.37	0	71	3.2e-005	1	U	R.SQISTESFLHLR.Y
	7195	719.8683	1437.7220	1437.7212	0.58	0	71	2.1e-005	1	U	R.DQPLDSSHIASIR.M
	7222	726.8859	1451.7573	1451.7555	1.26	0	72	1.7e-005	1	U	R.DIPLNQGCLAPVR.V
	7249	734.9100	1467.8055	1467.8046	0.64	0	82	1.2e-006	1	U	K.GGPVTVTDANLVLGR.L
	7441	582.2852	1743.8338	1743.8362	-1.38	0	64	0.00011	1	U	R.GHTACADAYLTPAIQR.Y
	7470	903.4247	1804.8348	1804.8316	1.80	0	58	0.00036	1	U	R.GGTFTDVFAQCPGGHVR.V
	7488	923.4896	1844.9647	1844.9632	0.79	0	101	2.6e-008	1	U	K.LVQGGVFQEEAVTEALR.A
	7631	710.3469	2128.0188	2128.0160	1.28	0	55	0.00095	1	U	R.SGLFVVGPESAGAHPGPACYR.K
	7649	1084.0718	2166.1290	2166.1281	0.43	0	94	1.4e-007	1	U	R.GSILDPSPEAAVVGGNVLTSQR.V
	7650	723.0504	2166.1294	2166.1281	0.63	0	(59)	0.00049	1	U	R.GSILDPSPEAAVVGGNVLTSQR.V
	Proteins matching the same set of peptides:
	NP_060040.1 Mass: 137371 Score: 955 Matches: 20(20) Sequences: 17(17)
	5-oxoprolinase [Homo sapiens]
	XP_011515262.1 Mass: 148347 Score: 955 Matches: 20(20) Sequences: 17(17)
	5-oxoprolinase isoform X3 [Homo sapiens]
	XP_047277644.1 Mass: 148735 Score: 955 Matches: 20(20) Sequences: 17(17)
	5-oxoprolinase isoform X1 [Homo sapiens]
	XP_047277645.1 Mass: 148392 Score: 955 Matches: 20(20) Sequences: 17(17)
	5-oxoprolinase isoform X2 [Homo sapiens]
	XP_047277646.1 Mass: 137758 Score: 955 Matches: 20(20) Sequences: 17(17)
	5-oxoprolinase isoform X4 [Homo sapiens]
8.	AAI44164.1 Mass: 135616 Score: 898 Matches: 28(28) Sequences: 27(27) emPAI: 0.84
	SMC2 protein [Homo sapiens]
	Query	Observed	Mr(expt)	Mr(calc)	ppm	Miss	Score	Expect	Rank	Unique	Peptide
	5404	448.2292	894.4439	894.4447	-0.83	0	38	0.027	1	U	K.SQSAFDLK.K
	5430	451.2588	900.5030	900.5028	0.14	1	40	0.034	1	U	R.IKENELR.A
	5536	459.7669	917.5192	917.5182	1.13	0	49	0.0031	1	U	R.SQAASILTK.F
	5809	493.8161	985.6176	985.6172	0.48	0	40	0.011	1	U	K.GLVASLISVK.D
	5892	501.7587	1001.5028	1001.5029	-0.07	0	44	0.011	1	U	K.DQEALEAVK.R
	6117	525.7825	1049.5505	1049.5506	-0.07	0	53	0.0015	1	U	K.FVDGVSTVAR.F
	6220	536.7985	1071.5825	1071.5811	1.25	0	69	4.8e-005	1	U	R.ALEEELAGLK.N
	6429	565.8062	1129.5977	1129.5979	-0.11	1	60	0.00035	1	U	R.KDQEALEAVK.R
	6474	574.2960	1146.5774	1146.5768	0.48	0	46	0.0081	1	U	K.TEEADLLQTK.L
	6488	575.8090	1149.6034	1149.6030	0.35	0	53	0.0012	1	U	R.ASNLQDLVYK.N
	6579	589.7930	1177.5715	1177.5714	0.11	0	55	0.00088	1	U	K.TIEESEETLK.N
	6584	591.2646	1180.5147	1180.5149	-0.11	0	36	0.032	1	U	K.DYDWINAER.H
	6597	593.3226	1184.6306	1184.6302	0.35	0	49	0.0031	1	U	K.NQALNIAWQK.V
	6646	601.8046	1201.5947	1201.5938	0.72	0	73	1.3e-005	1	U	R.SLEDALAEAQR.V
	6648	602.3022	1202.5899	1202.5891	0.70	0	52	0.0018	1	U	K.ENLTELSGGQR.S
	6684	608.8430	1215.6715	1215.6711	0.35	0	47	0.0055	1	U	K.EVITAQDTVIK.A
	6753	621.8373	1241.6600	1241.6615	-1.23	0	59	0.00029	1	U	K.QQLEAVNEAIK.S
	6852	639.8031	1277.5916	1277.5921	-0.38	0	57	0.00032	1	U	R.AMNVLTEAEER.Y
	6912	436.2508	1305.7306	1305.7292	1.10	1	39	0.026	1	U	R.LKETYEALLAR.F
	6950	442.2286	1323.6641	1323.6670	-2.19	0	42	0.023	1	U	K.ALNHEIEELEK.R
	6970	444.8928	1331.6566	1331.6568	-0.15	1	60	0.00041	1	U	K.LQEELSENDKK.I
	6971	666.8358	1331.6571	1331.6568	0.19	1	(57)	0.00074	1	U	K.LQEELSENDKK.I
	7004	674.8522	1347.6899	1347.6895	0.31	0	69	5e-005	1	U	K.YLINGVNANNTR.V
	7136	471.2407	1410.7003	1410.6991	0.90	1	58	0.00036	1	U	K.ASVSITFDNSDKK.Q
	7295	499.5950	1495.7633	1495.7630	0.14	0	42	0.016	1	U	K.ITDGLHALQEASNK.D
	7320	757.9203	1513.8260	1513.8239	1.40	0	61	0.00023	1	U	K.TILEEEITPTIQK.L
	7536	643.3491	1927.0254	1927.0262	-0.42	1	79	5e-006	1	U	K.QQEVEAITLELEELKR.E
	7549	652.9977	1955.9714	1955.9702	0.63	0	83	2.5e-006	1	U	R.TVTLGGDVFDPHGTLSGGAR.S
	Proteins matching the same set of peptides:
	AAC72360.1 Mass: 135696 Score: 898 Matches: 28(28) Sequences: 27(27)
	chromosome-associated protein-E [Homo sapiens]
	BAF85288.1 Mass: 135512 Score: 898 Matches: 28(28) Sequences: 27(27)
	unnamed protein product [Homo sapiens]
	NP_001036015.1 Mass: 135572 Score: 898 Matches: 28(28) Sequences: 27(27)
	structural maintenance of chromosomes protein 2 [Homo sapiens]
9.	AHW56459.1 Mass: 145075 Score: 870 Matches: 23(23) Sequences: 19(19) emPAI: 0.52
	cytoplasmic FMR1 interacting protein 1 isoform A, partial [Homo sapiens]
	Query	Observed	Mr(expt)	Mr(calc)	ppm	Miss	Score	Expect	Rank	Unique	Peptide
	4747	388.2133	774.4121	774.4123	-0.30	0	52	0.001	1		R.EGDLLTK.E
	5649	474.7668	947.5191	947.5189	0.24	0	39	0.032	1		R.NAFVTGIAR.Y
	6025	517.2271	1032.4397	1032.4400	-0.29	0	48	0.00099	1		R.YNYTSEEK.F
	6251	540.2847	1078.5549	1078.5546	0.28	0	41	0.021	1	U	K.DIVEYAELK.T
	6559	584.3462	1166.6778	1166.6771	0.59	0	83	4.7e-007	1		R.LGTPQQIAIAR.E
	6723	616.3217	1230.6288	1230.6284	0.26	0	54	0.0012	1		K.LADQIFAYYK.V
	6750	620.8728	1239.7310	1239.7299	0.92	0	47	0.0021	1	U	K.NVIQSVLQAIR.K
	6755	622.3434	1242.6723	1242.6707	1.29	0	48	0.0043	1		K.TVEVLEPEVTK.L
	6795	628.2992	1254.5838	1254.5840	-0.17	0	76	4.3e-006	1	U	R.YSNSEVVTGSGR.Q
	6926	438.8777	1313.6112	1313.6112	-0.06	0	(36)	0.047	1		R.EANHNVSAPYGR.I
	6927	657.8132	1313.6119	1313.6112	0.51	0	58	0.00025	1		R.EANHNVSAPYGR.I
	6978	447.2127	1338.6163	1338.6164	-0.09	0	(54)	0.00085	1	U	K.SGDGEGTPVEHVR.C
	6979	670.3156	1338.6167	1338.6164	0.18	0	104	7.5e-009	1	U	K.SGDGEGTPVEHVR.C
	7026	681.9044	1361.7943	1361.7918	1.80	0	68	1.5e-005	1		K.SLLQGTILQYVK.T
	7040	685.7622	1369.5097	1369.5092	0.40	0	50	0.00012	1	U	K.DCPDSAEEYER.A
	7115	701.3776	1400.7407	1400.7399	0.60	0	78	4.4e-006	1	U	R.SSLEGPTILDIEK.F
	7133	704.8664	1407.7182	1407.7180	0.14	0	60	0.00031	1		R.AVGPSSTQLYMVR.T
	7155	474.2821	1419.8244	1419.8238	0.42	0	55	0.00038	1		K.YAPLHLVPLIER.L
	7156	710.9197	1419.8248	1419.8238	0.72	0	(45)	0.0042	1		K.YAPLHLVPLIER.L
	7164	712.8648	1423.7151	1423.7130	1.49	0	(58)	0.00049	1		R.AVGPSSTQLYMVR.T
	7197	720.3840	1438.7535	1438.7530	0.35	0	57	0.00045	1		K.FINMFAVLDELK.N
	7386	789.4013	1576.7879	1576.7885	-0.36	0	84	1.3e-006	1	U	K.ALNLAYSSIYGSYR.N
	7634	715.3220	2142.9442	2142.9429	0.61	0	39	0.038	1	U	K.TVCDWETGHEPFNDPALR.G
	Proteins matching the same set of peptides:
	NP_001274739.1 Mass: 145089 Score: 870 Matches: 23(23) Sequences: 19(19)
	cytoplasmic FMR1-interacting protein 1 isoform a [Homo sapiens]
	NP_001311048.1 Mass: 148601 Score: 870 Matches: 23(23) Sequences: 19(19)
	cytoplasmic FMR1-interacting protein 1 isoform c [Homo sapiens]
	XP_003314611.1 Mass: 145119 Score: 870 Matches: 23(23) Sequences: 19(19)
	cytoplasmic FMR1-interacting protein 1 isoform X4 [Pan troglodytes]
10.	AAG41947.1 Mass: 66027 Score: 870 Matches: 19(19) Sequences: 17(17) emPAI: 1.19
	keratin 1 [Homo sapiens]
	Query	Observed	Mr(expt)	Mr(calc)	ppm	Miss	Score	Expect	Rank	Unique	Peptide
	5067	416.7476	831.4807	831.4814	-0.86	0	36	0.05	1	U	K.SISISVAR.G
	5745	487.2690	972.5233	972.5240	-0.64	0	49	0.0041	1		K.IEISELNR.V
	6027	517.2628	1032.5111	1032.5087	2.29	0	52	0.0019	1	U	R.TLLEGEESR.M
	6184	533.2639	1064.5131	1064.5138	-0.62	0	38	0.035	1	U	K.AQYEDIAQK.S
	6192	533.7625	1065.5105	1065.5090	1.33	1	48	0.0033	1		K.YEDEINKR.T
	6305	546.7567	1091.4987	1091.4956	2.89	0	80	1.6e-006	1	U	R.GSGGGSSGGSIGGR.G 6303 6306
	6412	563.2748	1124.5350	1124.5349	0.07	0	53	0.0011	1	U	K.AEAESLYQSK.Y
	6581	590.3043	1178.5941	1178.5931	0.82	0	53	0.0015	1	U	K.YEELQITAGR.H
	6816	633.3230	1264.6314	1264.6299	1.21	0	67	5.5e-005	1	U	R.TNAENEFVTIK.K
	6917	436.8897	1307.6471	1307.6469	0.15	2	48	0.0045	1	U	R.NKYEDEINKR.T
	6986	670.8379	1339.6612	1339.6619	-0.51	1	69	4.3e-005	1	U	K.SKAEAESLYQSK.Y
	7018	679.3518	1356.6891	1356.6885	0.44	0	73	1.5e-005	1	U	K.LNDLEDALQQAK.E
	7069	692.3489	1382.6833	1382.6830	0.23	0	80	2.3e-006	1	U	K.SLNNQFASFIDK.V
	7260	738.3966	1474.7785	1474.7780	0.38	0	58	0.00071	1		R.FLEQQNQVLQTK.W
	7575	665.3287	1992.9644	1992.9693	-2.49	0	67	6.8e-005	1	U	R.THNLEPYFESFINNLR.R
	7818	1192.4801	2382.9456	2382.9447	0.42	0	164	7.6e-016	1	U	R.GGGGGGYGSGGSSYGSGGGSYGSGGGGGGGR.G
	8031	1104.7745	3311.3018	3311.3009	0.26	0	92	4.9e-009	1	U	R.GSYGSGGSSYGSGGGSYGSGGGGGGHGSYGSGSSSGGYR.G
	Proteins matching the same set of peptides:
	NP_006112.3 Mass: 65999 Score: 870 Matches: 19(19) Sequences: 17(17)
	keratin, type II cytoskeletal 1 [Homo sapiens]
	AFA52002.1 Mass: 66013 Score: 870 Matches: 19(19) Sequences: 17(17)
	keratin 1 [Homo sapiens]
	AFA52003.1 Mass: 66029 Score: 870 Matches: 19(19) Sequences: 17(17)
	keratin 1 [Homo sapiens]
	AFA52004.1 Mass: 65930 Score: 870 Matches: 19(19) Sequences: 17(17)
	keratin 1 [Homo sapiens]
	AFA52005.1 Mass: 66086 Score: 870 Matches: 19(19) Sequences: 17(17)
	keratin 1 [Homo sapiens]
	AFA52006.1 Mass: 66026 Score: 870 Matches: 19(19) Sequences: 17(17)
	keratin 1 [Homo sapiens]
11.	NP_003461.2 Mass: 128220 Score: 740 Matches: 23(23) Sequences: 21(21) emPAI: 0.65
	ubiquitin carboxyl-terminal hydrolase 7 isoform 1 [Homo sapiens]
	Query	Observed	Mr(expt)	Mr(calc)	ppm	Miss	Score	Expect	Rank	Unique	Peptide
	4580	373.2076	744.4007	744.4017	-1.37	0	37	0.01	1	U	K.AVELGEK.A
	5400	447.7191	893.4237	893.4243	-0.67	0	38	0.029	1	U	K.ITDFENR.R
	5663	476.7219	951.4293	951.4298	-0.47	0	41	0.011	1	U	K.FDDDVVSR.C
	5721	482.7894	963.5643	963.5641	0.26	0	50	0.0011	1	U	R.LLEIVSYK.I
	5844	498.2473	994.4801	994.4794	0.75	0	40	0.018	1	U	R.VDVIFCDK.T
	6064	522.2905	1042.5665	1042.5659	0.62	0	39	0.03	1	U	R.VLLDNVENK.M
	6624	598.2956	1194.5766	1194.5768	-0.17	0	57	0.00043	1	U	R.IQDYDVSLDK.A
	6701	612.3030	1222.5915	1222.5917	-0.14	0	47	0.0049	1	U	K.CIWLNSQFR.E
	6737	618.8039	1235.5932	1235.5921	0.90	0	50	0.0027	1	U	R.EEEITLYPDK.H
	6928	657.8207	1313.6268	1313.6252	1.24	0	73	8.7e-006	1	U	R.SEATFQFTVER.F
	7209	482.8880	1445.6421	1445.6423	-0.12	0	(41)	0.011	1	U	K.YDAGEHGLQEAEK.G
	7210	723.8285	1445.6425	1445.6423	0.20	0	68	2.2e-005	1	U	K.YDAGEHGLQEAEK.G
	7276	742.3422	1482.6699	1482.6634	4.40	0	36	0.043	1	U	-.MNHQQQQQQQK.A
	7284	745.8892	1489.7638	1489.7599	2.59	0	73	1.8e-005	1	U	R.LSESVLSPPCFVR.N
	7321	758.3435	1514.6725	1514.6711	0.87	0	51	0.00089	1	U	R.FMYDPQTDQNIK.I
	7363	772.8394	1543.6642	1543.6638	0.25	0	70	1e-005	1	U	K.DDPENDNSELPTAK.E
	7443	437.7303	1746.8923	1746.8941	-1.03	0	50	0.0039	1	U	R.VFYELQHSDKPVGTK.K
	7463	897.4207	1792.8267	1792.8268	-0.00	0	41	0.019	1	U	R.HQYINEDEYEVNLK.D
	7505	940.4786	1878.9426	1878.9404	1.20	0	49	0.0042	1	U	R.FEFPEQLPLDEFLQK.T
	7604	685.9722	2054.8947	2054.8930	0.84	0	48	0.0015	1	U	K.EEAIEHNYGGHDDDLSVR.H
	7605	514.7318	2054.8981	2054.8930	2.52	0	(39)	0.012	1	U	K.EEAIEHNYGGHDDDLSVR.H
	7736	756.3835	2266.1288	2266.1263	1.09	0	55	0.0012	1	U	K.IIGVHQEDELLECLSPATSR.T
	7760	764.0735	2289.1986	2289.1965	0.95	0	74	1.4e-005	1	U	K.LSEVLQAVTDHDIPQQLVER.L
	Proteins matching the same set of peptides:
	CAA96580.1 Mass: 128190 Score: 740 Matches: 23(23) Sequences: 21(21)
	herpesvirus associated ubiquitin-specific protease (HAUSP) [Homo sapiens]
12.	BAF98736.1 Mass: 141442 Score: 693 Matches: 18(18) Sequences: 18(18) emPAI: 0.48
	unnamed protein product [Homo sapiens]
	Query	Observed	Mr(expt)	Mr(calc)	ppm	Miss	Score	Expect	Rank	Unique	Peptide
	6062	348.2255	1041.6547	1041.6546	0.12	1	38	0.015	1	U	R.IKLEGIITR.V
	6068	522.7703	1043.5260	1043.5247	1.20	0	45	0.0078	1	U	R.VDALNDEIR.Q
	6226	537.2772	1072.5399	1072.5400	-0.14	0	43	0.015	1	U	K.LDQDLNEVK.A
	6437	568.2309	1134.4472	1134.4466	0.59	0	37	0.0031	1	U	K.DFVEDDTTHG.-
	6439	568.2595	1134.5044	1134.5040	0.29	0	35	0.035	1	U	R.SEDLDNSIDK.T
	6525	579.3302	1156.6458	1156.6452	0.60	0	45	0.0078	1	U	K.AILNGIDSINK.V
	6567	587.2805	1172.5464	1172.5462	0.14	0	56	0.00036	1	U	R.GALTGGYYDTR.K
	6738	618.8095	1235.6045	1235.6034	0.87	0	48	0.0045	1	U	R.DQTIVDPFSSK.H
	6783	625.8228	1249.6309	1249.6302	0.57	0	66	7.8e-005	1	U	R.VETYLNENLR.K
	6810	631.8242	1261.6339	1261.6336	0.22	1	54	0.0012	1	U	R.KLEQCNTELK.K
	6878	646.3045	1290.5944	1290.5939	0.42	1	41	0.014	1	U	K.DLEDTEANKEK.N
	6894	651.3202	1300.6259	1300.6259	0.07	0	75	7.2e-006	1	U	R.EENAEQQALAAK.R
	6995	673.3457	1344.6768	1344.6772	-0.27	1	65	8.9e-005	1	U	R.KAEEELGELEAK.L
	7095	464.2503	1389.7290	1389.7286	0.30	2	64	0.00015	1	U	R.KLEQCNTELKK.Y
	7167	713.3547	1424.6948	1424.6936	0.86	0	58	0.0004	1	U	K.ALDQFVNFSEQK.E
	7559	982.9877	1963.9608	1963.9600	0.41	0	109	4.2e-009	1	U	R.GSGSQSSVPSVDQFTGVGIR.V
	7646	722.9728	2165.8967	2165.8945	1.02	1	91	2.8e-008	1	U	K.KGDVEGSQSQDEGEGSGESER.G
	7694	740.7171	2219.1295	2219.1281	0.62	1	81	3.5e-006	1	U	R.ETEGGTVLTATTSELEAINKR.V
	Proteins matching the same set of peptides:
	AAH47324.1 Mass: 141420 Score: 693 Matches: 18(18) Sequences: 18(18)
	Structural maintenance of chromosomes 3 [Homo sapiens]
	EAW49558.1 Mass: 141592 Score: 693 Matches: 18(18) Sequences: 18(18)
	chondroitin sulfate proteoglycan 6 (bamacan), isoform CRA_b [Homo sapiens]
	NP_001126947.1 Mass: 141454 Score: 693 Matches: 18(18) Sequences: 18(18)
	structural maintenance of chromosomes protein 3 [Pongo abelii]
13.	AAH11762.1 Mass: 145567 Score: 663 Matches: 18(18) Sequences: 14(14) emPAI: 0.37
	Cytoplasmic FMR1 interacting protein 2 [Homo sapiens]
	Query	Observed	Mr(expt)	Mr(calc)	ppm	Miss	Score	Expect	Rank	Unique	Peptide
	4747	388.2133	774.4121	774.4123	-0.30	0	52	0.001	1		R.EGDLLTK.E
	5649	474.7668	947.5191	947.5189	0.24	0	39	0.032	1		R.NAFVTGIAR.Y
	5725	483.2562	964.4979	964.4978	0.11	0	45	0.0066	1	U	K.TDVFQSLR.E
	6025	517.2271	1032.4397	1032.4400	-0.29	0	48	0.00099	1		R.YNYTSEEK.F
	6559	584.3462	1166.6778	1166.6771	0.59	0	83	4.7e-007	1		R.LGTPQQIAIAR.E
	6723	616.3217	1230.6288	1230.6284	0.26	0	54	0.0012	1		K.LADQIFAYYK.A
	6755	622.3434	1242.6723	1242.6707	1.29	0	48	0.0043	1		K.TVEVLEPEVTK.L
	6870	644.3383	1286.6620	1286.6619	0.06	0	50	0.0034	1	U	R.TAIPFTQEPQR.D
	6926	438.8777	1313.6112	1313.6112	-0.06	0	(36)	0.047	1		R.EANHNVSAPYGR.I
	6927	657.8132	1313.6119	1313.6112	0.51	0	58	0.00025	1		R.EANHNVSAPYGR.I
	7026	681.9044	1361.7943	1361.7918	1.80	0	68	1.5e-005	1		K.SLLQGTILQYVK.T
	7133	704.8664	1407.7182	1407.7180	0.14	0	60	0.00031	1		R.AVGPSSTQLYMVR.T
	7155	474.2821	1419.8244	1419.8238	0.42	0	55	0.00038	1		K.YAPLHLVPLIER.L
	7156	710.9197	1419.8248	1419.8238	0.72	0	(45)	0.0042	1		K.YAPLHLVPLIER.L
	7164	712.8648	1423.7151	1423.7130	1.49	0	(58)	0.00049	1		R.AVGPSSTQLYMVR.T
	7197	720.3840	1438.7535	1438.7530	0.35	0	57	0.00045	1		K.FINMFAVLDELK.N
	7205	482.5671	1444.6796	1444.6794	0.12	0	(66)	5.7e-005	1	U	K.SVETDSSTVEHVR.C
	7206	723.3479	1444.6812	1444.6794	1.27	0	82	1.5e-006	1	U	K.SVETDSSTVEHVR.C
	Proteins matching the same set of peptides:
	CAB66484.1 Mass: 145580 Score: 663 Matches: 18(18) Sequences: 14(14)
	hypothetical protein [Homo sapiens]
	NP_001032410.1 Mass: 145579 Score: 663 Matches: 18(18) Sequences: 14(14)
	cytoplasmic FMR1-interacting protein 2 isoform a [Homo sapiens]
	NP_001278650.1 Mass: 142485 Score: 663 Matches: 18(18) Sequences: 14(14)
	cytoplasmic FMR1-interacting protein 2 isoform b [Homo sapiens]
14.	BAG58628.1 Mass: 130693 Score: 656 Matches: 20(20) Sequences: 15(15) emPAI: 0.45
	unnamed protein product [Homo sapiens]
	Query	Observed	Mr(expt)	Mr(calc)	ppm	Miss	Score	Expect	Rank	Unique	Peptide
	4568	371.7446	741.4746	741.4748	-0.26	0	33	0.0089	1	U	K.IALALNK.V
	4792	389.2162	776.4178	776.4181	-0.40	0	48	0.0017	1	U	R.FASSPLR.V
	5764	489.2748	976.5350	976.5342	0.85	0	43	0.013	1	U	K.LVTFENVR.M
	5775	491.2166	980.4186	980.4199	-1.36	0	33	0.043	1	U	K.VNFEDDSR.G
	6404	561.7933	1121.5721	1121.5717	0.38	0	63	0.00016	1	U	K.TTFEDLIQR.C
	6446	380.5016	1138.4829	1138.4826	0.34	0	(39)	0.0088	1	U	K.SCATFSSSHR.Y
	6447	570.2490	1138.4834	1138.4826	0.71	0	59	0.00011	1	U	K.SCATFSSSHR.Y
	6558	584.2802	1166.5459	1166.5455	0.30	0	60	0.00017	1	U	K.IDASQTEFEK.N
	6661	604.2849	1206.5553	1206.5551	0.18	0	59	0.00021	1	U	R.CLSSATDPQTK.R
	6900	434.9309	1301.7709	1301.7707	0.16	0	47	0.0019	1	U	K.KPIPDEHLILK.T
	6909	436.2179	1305.6318	1305.6313	0.33	0	(43)	0.012	1	U	R.AQGEPVAGHESPK.I
	6910	653.8235	1305.6324	1305.6313	0.85	0	50	0.0023	1	U	R.AQGEPVAGHESPK.I
	7184	717.3787	1432.7428	1432.7423	0.34	0	(40)	0.033	1	U	R.QVQHILASASPSGR.A
	7217	484.2635	1449.7686	1449.7688	-0.18	0	63	0.00015	1	U	R.QVQHILASASPSGR.A
	7218	725.8923	1449.7700	1449.7688	0.81	0	(55)	0.00083	1	U	R.QVQHILASASPSGR.A
	7411	843.9006	1685.7866	1685.7831	2.04	0	49	0.0023	1	U	K.TQPPEDISCIAWNR.Q
	7484	613.3305	1836.9697	1836.9694	0.19	0	75	9.1e-006	1	U	R.EQTLSPTITSGLHNIAR.S
	7718	1121.5322	2241.0499	2241.0484	0.66	0	60	0.00028	1	U	R.SDQLQQAVQSQGFINYCQK.K
	7719	748.0242	2241.0509	2241.0484	1.08	0	(56)	0.00081	1	U	R.SDQLQQAVQSQGFINYCQK.K
	7952	928.0946	2781.2620	2781.2577	1.55	0	61	0.00019	1	U	K.DSDQVAQSDGEESPAAEEQLLGEHIK.E
	Proteins matching the same set of peptides:
	BAA84924.1 Mass: 132947 Score: 656 Matches: 20(20) Sequences: 15(15)
	ABP130 [Homo sapiens]
	NP_001070674.1 Mass: 121575 Score: 656 Matches: 20(20) Sequences: 15(15)
	protein transport protein Sec31A isoform 4 [Homo sapiens]
	NP_001070675.1 Mass: 132931 Score: 656 Matches: 20(20) Sequences: 15(15)
	protein transport protein Sec31A isoform 1 [Homo sapiens]
	NP_001070676.1 Mass: 131451 Score: 656 Matches: 20(20) Sequences: 15(15)
	protein transport protein Sec31A isoform 3 [Homo sapiens]
	NP_001177978.1 Mass: 130665 Score: 656 Matches: 20(20) Sequences: 15(15)
	protein transport protein Sec31A isoform 5 [Homo sapiens]
	NP_001387083.1 Mass: 136141 Score: 656 Matches: 20(20) Sequences: 15(15)
	protein transport protein Sec31A isoform 8 [Homo sapiens]
	NP_001387085.1 Mass: 134661 Score: 656 Matches: 20(20) Sequences: 15(15)
	protein transport protein Sec31A isoform 9 [Homo sapiens]
	NP_001387086.1 Mass: 134415 Score: 656 Matches: 20(20) Sequences: 15(15)
	protein transport protein Sec31A isoform 10 [Homo sapiens]
	NP_001387143.1 Mass: 132144 Score: 656 Matches: 20(20) Sequences: 15(15)
	protein transport protein Sec31A isoform 25 [Homo sapiens]
15.	NP_004477.5 Mass: 113017 Score: 606 Matches: 14(14) Sequences: 13(13) emPAI: 0.42
	golgin subfamily A member 2 isoform 2 [Homo sapiens]
	Query	Observed	Mr(expt)	Mr(calc)	ppm	Miss	Score	Expect	Rank	Unique	Peptide
	5999	514.2579	1026.5012	1026.4982	2.93	0	45	0.0049	1	U	K.TFSSTESLR.Q
	6024	516.7878	1031.5610	1031.5611	-0.10	0	50	0.0032	1	U	R.ALSAVSTQQK.K
	6123	351.2129	1050.6170	1050.6185	-1.45	0	37	0.014	1	U	R.LAHLLASAQK.E
	6302	546.7435	1091.4725	1091.4731	-0.51	0	60	6.6e-005	1	U	K.EGESEDLASR.L
	6538	580.7811	1159.5476	1159.5469	0.59	0	59	0.00023	1	U	R.QELQETQER.L
	6711	613.3796	1224.7446	1224.7441	0.38	0	69	7.1e-006	1	U	K.LLELQELVLR.L
	6897	651.8236	1301.6327	1301.6324	0.23	0	65	7.5e-005	1	U	K.SQEAQSLQQQR.D
	6967	665.8226	1329.6306	1329.6313	-0.53	0	71	1.8e-005	1	U	R.AAELWGEQAEAR.R
	7003	450.2162	1347.6268	1347.6266	0.17	1	68	5.7e-005	1	U	R.QKEGESEDLASR.L
	7110	700.3685	1398.7224	1398.7215	0.63	0	100	2.3e-008	1	U	R.LEAATQQNQQLR.A
	7178	717.3480	1432.6815	1432.6794	1.48	1	(50)	0.0024	1	U	K.NTQSNEDLKQEK.S
	7179	478.5678	1432.6816	1432.6794	1.56	1	58	0.00037	1	U	K.NTQSNEDLKQEK.S
	7465	900.4632	1798.9118	1798.9101	0.97	0	92	2e-007	1	U	R.YQQLAVALDSSYVTNK.Q
	7645	722.6550	2164.9433	2164.9444	-0.51	0	81	9.9e-007	1	U	K.EPEAAAPAPGTGGDSVCGETHR.A
	Proteins matching the same set of peptides:
	AAF65550.1 Mass: 111590 Score: 606 Matches: 14(14) Sequences: 13(13)
	golgi matrix protein GM130 [Homo sapiens]
	EAW87763.1 Mass: 114603 Score: 606 Matches: 14(14) Sequences: 13(13)
	golgi autoantigen, golgin subfamily a, 2, isoform CRA_b [Homo sapiens]
	EAW87764.1 Mass: 113528 Score: 606 Matches: 14(14) Sequences: 13(13)
	golgi autoantigen, golgin subfamily a, 2, isoform CRA_c, partial [Homo sapiens]
	NP_001353173.2 Mass: 116029 Score: 606 Matches: 14(14) Sequences: 13(13)
	golgin subfamily A member 2 isoform 1 [Homo sapiens]
	NP_001376625.2 Mass: 115441 Score: 606 Matches: 14(14) Sequences: 13(13)
	golgin subfamily A member 2 isoform 4 [Homo sapiens]
	NP_001376629.2 Mass: 111433 Score: 606 Matches: 14(14) Sequences: 13(13)
	golgin subfamily A member 2 isoform 8 [Homo sapiens]
	NP_001376631.2 Mass: 109654 Score: 606 Matches: 14(14) Sequences: 13(13)
	golgin subfamily A member 2 isoform 10 [Homo sapiens]
	KAI4008643.1 Mass: 111491 Score: 606 Matches: 14(14) Sequences: 13(13)
	golgin A2 [Homo sapiens]
	KAI4008644.1 Mass: 112918 Score: 606 Matches: 14(14) Sequences: 13(13)
	golgin A2 [Homo sapiens]
16.	NP_000692.2 Mass: 112824 Score: 467 Matches: 14(14) Sequences: 14(14) emPAI: 0.46
	sodium/potassium-transporting ATPase subunit alpha-1 isoform a [Homo sapiens]
	Query	Observed	Mr(expt)	Mr(calc)	ppm	Miss	Score	Expect	Rank	Unique	Peptide
	4572	372.2239	742.4333	742.4337	-0.58	0	56	0.00019	1	U	R.AAEILAR.D
	4928	402.2131	802.4116	802.4119	-0.37	0	36	0.049	1	U	R.IAGLCNR.A
	4964	406.2003	810.3861	810.3872	-1.34	0	48	0.0012	1	U	K.YGTDLSR.G
	5032	414.2347	826.4549	826.4549	0.00	0	36	0.021	1		R.AAVPDAVGK.C
	5770	490.2643	978.5139	978.5135	0.50	0	43	0.012	1	U	R.GIVVYTGDR.T
	5789	328.1820	981.5242	981.5243	-0.12	0	37	0.032	1	U	K.LSLDELHR.K
	5934	507.7739	1013.5332	1013.5328	0.45	0	44	0.0069	1	U	R.CSSILLHGK.E
	6292	544.3007	1086.5868	1086.5856	1.12	0	51	0.0026	1		K.LIIVEGCQR.Q
	6724	616.3300	1230.6455	1230.6456	-0.05	0	78	6.4e-006	1	U	R.AVAGDASESALLK.C
	6739	618.8572	1235.6999	1235.6986	1.07	0	64	5.6e-005	1	U	R.LNIPVSQVNPR.D
	6806	631.3434	1260.6723	1260.6714	0.75	0	63	0.00015	1		K.IVEIPFNSTNK.Y
	6866	642.8589	1283.7032	1283.7020	0.97	0	38	0.04	1	U	K.NMVPQQALVIR.N
	7327	760.3557	1518.6969	1518.6950	1.20	0	75	5.5e-006	1	U	R.SPDFTNENPLETR.N
	7967	945.4672	2833.3797	2833.3770	0.95	1	73	2.8e-005	1		K.EQPLDEELKDAFQNAYLELGGLGER.V
	Proteins matching the same set of peptides:
	BAH11971.1 Mass: 112836 Score: 467 Matches: 14(14) Sequences: 14(14)
	unnamed protein product [Homo sapiens]
	BAH12337.1 Mass: 112366 Score: 467 Matches: 14(14) Sequences: 14(14)
	unnamed protein product, partial [Homo sapiens]
	BAG37313.1 Mass: 112797 Score: 467 Matches: 14(14) Sequences: 14(14)
	unnamed protein product [Homo sapiens]
	NP_001153705.1 Mass: 112928 Score: 467 Matches: 14(14) Sequences: 14(14)
	sodium/potassium-transporting ATPase subunit alpha-1 isoform c [Homo sapiens]
	NP_001153706.1 Mass: 109480 Score: 467 Matches: 14(14) Sequences: 14(14)
	sodium/potassium-transporting ATPase subunit alpha-1 isoform d [Homo sapiens]
17.	NP_001509.3 Mass: 107902 Score: 442 Matches: 15(15) Sequences: 15(15) emPAI: 0.53
	general transcription factor II-I isoform 4 [Homo sapiens]
	Query	Observed	Mr(expt)	Mr(calc)	ppm	Miss	Score	Expect	Rank	Unique	Peptide
	5174	424.7657	847.5168	847.5167	0.05	0	43	0.0035	1	U	K.AGISFIIK.R
	5735	485.2593	968.5039	968.5039	0.03	0	42	0.0093	1	U	K.HELLNSTR.E
	5837	496.7558	991.4971	991.4974	-0.33	0	49	0.0031	1	U	K.VENLFNEK.C
	6034	518.2894	1034.5642	1034.5648	-0.58	0	47	0.0053	1	U	R.ILDSAEFIK.F
	6280	543.2265	1084.4384	1084.4383	0.17	0	43	0.0019	1	U	K.YCVEEEEK.A
	6356	554.2729	1106.5312	1106.5356	-3.98	0	38	0.043	1	U	R.EQVNDLFSR.K
	6388	559.8086	1117.6026	1117.6019	0.63	0	38	0.042	1	U	K.STVVPVPYEK.M
	6407	562.2849	1122.5551	1122.5557	-0.47	0	77	4.6e-006	1	U	K.FAEALGSTEAK.A
	6716	614.7855	1227.5565	1227.5560	0.39	0	42	0.0085	1	U	R.EFSFEAWNAK.I
	6770	624.3540	1246.6934	1246.6921	1.07	1	42	0.013	1	U	R.KQVEEIFNLK.F
	6771	624.3542	1246.6938	1246.6921	1.37	0	66	6.1e-005	1	U	K.FAQALGLTEAVK.V
	6840	636.8351	1271.6557	1271.6544	1.07	0	77	5.6e-006	1	U	R.SILSPGGSCGPIK.V
	7112	700.3760	1398.7374	1398.7354	1.40	0	41	0.022	1	U	R.EDLQLDKPASGVK.E
	7497	622.3347	1863.9823	1863.9803	1.11	0	45	0.0092	1	U	K.RPELLTHSTTEVTQPR.T
	7812	788.7321	2363.1744	2363.1717	1.12	0	63	0.0002	1	U	K.VPEIEVTVEGPNNNNPQTSAVR.T
	Proteins matching the same set of peptides:
	BAG58013.1 Mass: 111846 Score: 442 Matches: 15(15) Sequences: 15(15)
	unnamed protein product [Homo sapiens]
	BAF85521.1 Mass: 110139 Score: 442 Matches: 15(15) Sequences: 15(15)
	unnamed protein product [Homo sapiens]
	AAH99907.1 Mass: 110011 Score: 442 Matches: 15(15) Sequences: 15(15)
	General transcription factor II, i [Homo sapiens]
	NP_127492.1 Mass: 112346 Score: 442 Matches: 15(15) Sequences: 15(15)
	general transcription factor II-I isoform 1 [Homo sapiens]
	NP_127493.1 Mass: 110211 Score: 442 Matches: 15(15) Sequences: 15(15)
	general transcription factor II-I isoform 2 [Homo sapiens]
	NP_127494.1 Mass: 110037 Score: 442 Matches: 15(15) Sequences: 15(15)
	general transcription factor II-I isoform 3 [Homo sapiens]
	NP_001157108.1 Mass: 109966 Score: 442 Matches: 15(15) Sequences: 15(15)
	general transcription factor II-I isoform 5 [Homo sapiens]
	KAI2546248.1 Mass: 130965 Score: 442 Matches: 15(15) Sequences: 15(15)
	general transcription factor IIi [Homo sapiens]
18.	AAA59553.1 Mass: 121105 Score: 440 Matches: 11(11) Sequences: 11(11) emPAI: 0.32
	microtubule-associated protein 4 [Homo sapiens]
	Query	Observed	Mr(expt)	Mr(calc)	ppm	Miss	Score	Expect	Rank	Unique	Peptide
	4512	365.2106	728.4066	728.4068	-0.33	0	35	0.014	1	U	K.TEAPLAK.D
	4523	366.2181	730.4217	730.4225	-1.04	0	41	0.0047	1	U	K.TEVALAK.D
	6505	578.3406	1154.6667	1154.6659	0.71	0	50	0.0016	1	U	K.TKPLATTQPAK.T
	6632	598.8357	1195.6568	1195.6561	0.62	0	69	2.3e-005	1	U	K.QPAPTTIGGLNK.K
	6740	618.8640	1235.7135	1235.7125	0.78	0	57	0.00019	1	U	K.ALPLEAEVAPVK.D
	6997	673.3701	1344.7256	1344.7249	0.52	0	108	5.5e-009	1	U	K.VALSSETEVALAR.D
	7053	689.3519	1376.6892	1376.6896	-0.28	0	66	7.8e-005	1	U	K.TTTAAAVASTGPSSR.S
	7140	706.8910	1411.7674	1411.7671	0.24	0	91	1.8e-007	1	U	K.DGVLTLANNVTPAK.D
	7152	710.8651	1419.7155	1419.7133	1.57	0	45	0.01	1	U	K.TDYIPLLDVDEK.T
	7247	734.4069	1466.7993	1466.7981	0.84	0	52	0.0018	1	U	K.NVVLPTETEVAPAK.D
	7262	738.8492	1475.6839	1475.6814	1.75	0	51	0.0026	1	U	K.CSLPAEEDSVLEK.L
	Proteins matching the same set of peptides:
	AAA67361.1 Mass: 120944 Score: 440 Matches: 11(11) Sequences: 11(11)
	microtubule-associated protein 4 [Homo sapiens]
	BAD92614.1 Mass: 122865 Score: 440 Matches: 11(11) Sequences: 11(11)
	microtubule-associated protein 4 isoform 1 variant, partial [Homo sapiens]
	NP_001127836.1 Mass: 119884 Score: 440 Matches: 11(11) Sequences: 11(11)
	microtubule-associated protein 4 isoform 4 [Homo sapiens]
	NP_001371604.1 Mass: 109623 Score: 440 Matches: 11(11) Sequences: 11(11)
	microtubule-associated protein 4 isoform 92 [Homo sapiens]
	NP_001371606.1 Mass: 112291 Score: 440 Matches: 11(11) Sequences: 11(11)
	microtubule-associated protein 4 isoform 74 [Homo sapiens]
	NP_001371607.1 Mass: 114900 Score: 440 Matches: 11(11) Sequences: 11(11)
	microtubule-associated protein 4 isoform 55 [Homo sapiens]
	NP_001371608.1 Mass: 121258 Score: 440 Matches: 11(11) Sequences: 11(11)
	microtubule-associated protein 4 isoform 17 [Homo sapiens]
	NP_001371610.1 Mass: 115698 Score: 440 Matches: 11(11) Sequences: 11(11)
	microtubule-associated protein 4 isoform 56 [Homo sapiens]
	NP_001371658.1 Mass: 120930 Score: 440 Matches: 11(11) Sequences: 11(11)
	microtubule-associated protein 4 isoform 1 [Homo sapiens]
	NP_001371659.1 Mass: 118708 Score: 440 Matches: 11(11) Sequences: 11(11)
	microtubule-associated protein 4 isoform 26 [Homo sapiens]
	NP_001371660.1 Mass: 121244 Score: 440 Matches: 11(11) Sequences: 11(11)
	microtubule-associated protein 4 isoform 16 [Homo sapiens]
	NP_001371663.1 Mass: 117085 Score: 440 Matches: 11(11) Sequences: 11(11)
	microtubule-associated protein 4 isoform 40 [Homo sapiens]
	NP_001371664.1 Mass: 113809 Score: 440 Matches: 11(11) Sequences: 11(11)
	microtubule-associated protein 4 isoform 63 [Homo sapiens]
	NP_001371665.1 Mass: 122762 Score: 440 Matches: 11(11) Sequences: 11(11)
	microtubule-associated protein 4 isoform 12 [Homo sapiens]
	NP_001371667.1 Mass: 122021 Score: 440 Matches: 11(11) Sequences: 11(11)
	microtubule-associated protein 4 isoform 14 [Homo sapiens]
	NP_001371675.1 Mass: 113004 Score: 440 Matches: 11(11) Sequences: 11(11)
	microtubule-associated protein 4 isoform 70 [Homo sapiens]
	NP_001371680.1 Mass: 113582 Score: 440 Matches: 11(11) Sequences: 11(11)
	microtubule-associated protein 4 isoform 66 [Homo sapiens]
	NP_001371685.1 Mass: 118366 Score: 440 Matches: 11(11) Sequences: 11(11)
	microtubule-associated protein 4 isoform 39 [Homo sapiens]
	NP_001371686.1 Mass: 107401 Score: 440 Matches: 11(11) Sequences: 11(11)
	microtubule-associated protein 4 isoform 104 [Homo sapiens]
	NP_001371687.1 Mass: 108103 Score: 440 Matches: 11(11) Sequences: 11(11)
	microtubule-associated protein 4 isoform 100 [Homo sapiens]
	NP_001371703.1 Mass: 119412 Score: 440 Matches: 11(11) Sequences: 11(11)
	microtubule-associated protein 4 isoform 22 [Homo sapiens]
	NP_001371705.1 Mass: 114754 Score: 440 Matches: 11(11) Sequences: 11(11)
	microtubule-associated protein 4 isoform [Homo sapiens]
	NP_001371706.1 Mass: 115432 Score: 440 Matches: 11(11) Sequences: 11(11)
	microtubule-associated protein 4 isoform 52 [Homo sapiens]
	NP_001371710.1 Mass: 117654 Score: 440 Matches: 11(11) Sequences: 11(11)
	microtubule-associated protein 4 isoform 36 [Homo sapiens]
	NP_001371711.1 Mass: 117190 Score: 440 Matches: 11(11) Sequences: 11(11)
	microtubule-associated protein 4 isoform 41 [Homo sapiens]
	NP_001371720.1 Mass: 118576 Score: 440 Matches: 11(11) Sequences: 11(11)
	microtubule-associated protein 4 isoform 28 [Homo sapiens]
	NP_001371721.1 Mass: 115641 Score: 440 Matches: 11(11) Sequences: 11(11)
	microtubule-associated protein 4 isoform 49 [Homo sapiens]
	NP_001371725.1 Mass: 118917 Score: 440 Matches: 11(11) Sequences: 11(11)
	microtubule-associated protein 4 isoform 24 [Homo sapiens]
	NP_001371726.1 Mass: 117058 Score: 440 Matches: 11(11) Sequences: 11(11)
	microtubule-associated protein 4 isoform 43 [Homo sapiens]
	NP_001371732.1 Mass: 105435 Score: 440 Matches: 11(11) Sequences: 11(11)
	microtubule-associated protein 4 isoform 110 [Homo sapiens]
	NP_001371735.1 Mass: 112899 Score: 440 Matches: 11(11) Sequences: 11(11)
	microtubule-associated protein 4 isoform 71 [Homo sapiens]
	NP_001371736.1 Mass: 104804 Score: 440 Matches: 11(11) Sequences: 11(11)
	microtubule-associated protein 4 isoform 111 [Homo sapiens]
	NP_001371748.1 Mass: 112237 Score: 440 Matches: 11(11) Sequences: 11(11)
	microtubule-associated protein 4 isoform 76 [Homo sapiens]
	NP_001371754.1 Mass: 109621 Score: 440 Matches: 11(11) Sequences: 11(11)
	microtubule-associated protein 4 isoform 88 [Homo sapiens]
	NP_001371757.1 Mass: 114863 Score: 440 Matches: 11(11) Sequences: 11(11)
	microtubule-associated protein 4 isoform 57 [Homo sapiens]
	NP_001371763.1 Mass: 117834 Score: 440 Matches: 11(11) Sequences: 11(11)
	microtubule-associated protein 4 isoform 35 [Homo sapiens]
	NP_001371766.1 Mass: 115226 Score: 440 Matches: 11(11) Sequences: 11(11)
	microtubule-associated protein 4 isoform 54 [Homo sapiens]
	NP_001371772.1 Mass: 112556 Score: 440 Matches: 11(11) Sequences: 11(11)
	microtubule-associated protein 4 isoform 72 [Homo sapiens]
	NP_001371775.1 Mass: 115567 Score: 440 Matches: 11(11) Sequences: 11(11)
	microtubule-associated protein 4 isoform 51 [Homo sapiens]
	NP_001371792.1 Mass: 116894 Score: 440 Matches: 11(11) Sequences: 11(11)
	microtubule-associated protein 4 isoform 47 [Homo sapiens]
	NP_001371793.1 Mass: 114522 Score: 440 Matches: 11(11) Sequences: 11(11)
	microtubule-associated protein 4 isoform 60 [Homo sapiens]
	NP_001371797.1 Mass: 116744 Score: 440 Matches: 11(11) Sequences: 11(11)
	microtubule-associated protein 4 isoform 46 [Homo sapiens]
	NP_001371798.1 Mass: 111587 Score: 440 Matches: 11(11) Sequences: 11(11)
	microtubule-associated protein 4 isoform 78 [Homo sapiens]
	NP_001371801.1 Mass: 113383 Score: 440 Matches: 11(11) Sequences: 11(11)
	microtubule-associated protein 4 isoform 68 [Homo sapiens]
	NP_001371802.1 Mass: 117833 Score: 440 Matches: 11(11) Sequences: 11(11)
	microtubule-associated protein 4 isoform 33 [Homo sapiens]
	NP_001371804.1 Mass: 120504 Score: 440 Matches: 11(11) Sequences: 11(11)
	microtubule-associated protein 4 isoform 19 [Homo sapiens]
	NP_001371805.1 Mass: 116742 Score: 440 Matches: 11(11) Sequences: 11(11)
	microtubule-associated protein 4 isoform 42 [Homo sapiens]
	NP_001371808.1 Mass: 119358 Score: 440 Matches: 11(11) Sequences: 11(11)
	microtubule-associated protein 4 isoform 5 [Homo sapiens]
	NP_001371822.1 Mass: 108105 Score: 440 Matches: 11(11) Sequences: 11(11)
	microtubule-associated protein 4 isoform 103 [Homo sapiens]
	KAI2529363.1 Mass: 119898 Score: 440 Matches: 11(11) Sequences: 11(11)
	microtubule associated protein 4 [Homo sapiens]
	XP_047304086.1 Mass: 123853 Score: 440 Matches: 11(11) Sequences: 11(11)
	microtubule-associated protein 4 isoform X19 [Homo sapiens]
	XP_047304087.1 Mass: 122336 Score: 440 Matches: 11(11) Sequences: 11(11)
	microtubule-associated protein 4 isoform X20 [Homo sapiens]
	NP_001371605.1 Mass: 119326 Score: 440 Matches: 11(11) Sequences: 11(11)
	microtubule-associated protein 4 isoform 23 [Homo sapiens]
	NP_001371609.1 Mass: 110248 Score: 440 Matches: 11(11) Sequences: 11(11)
	microtubule-associated protein 4 isoform 86 [Homo sapiens]
	NP_001371673.1 Mass: 118490 Score: 440 Matches: 11(11) Sequences: 11(11)
	microtubule-associated protein 4 isoform 30 [Homo sapiens]
	NP_001371674.1 Mass: 123781 Score: 440 Matches: 11(11) Sequences: 11(11)
	microtubule-associated protein 4 isoform 10 [Homo sapiens]
	NP_001371677.1 Mass: 121935 Score: 440 Matches: 11(11) Sequences: 11(11)
	microtubule-associated protein 4 isoform 15 [Homo sapiens]
	NP_001371683.1 Mass: 117568 Score: 440 Matches: 11(11) Sequences: 11(11)
	microtubule-associated protein 4 isoform 38 [Homo sapiens]
	NP_001371684.1 Mass: 109537 Score: 440 Matches: 11(11) Sequences: 11(11)
	microtubule-associated protein 4 isoform 94 [Homo sapiens]
	NP_001371712.1 Mass: 111501 Score: 440 Matches: 11(11) Sequences: 11(11)
	microtubule-associated protein 4 isoform 80 [Homo sapiens]
	NP_001371715.1 Mass: 114777 Score: 440 Matches: 11(11) Sequences: 11(11)
	microtubule-associated protein 4 isoform 58 [Homo sapiens]
	NP_001371717.1 Mass: 122676 Score: 440 Matches: 11(11) Sequences: 11(11)
	microtubule-associated protein 4 isoform 13 [Homo sapiens]
	NP_001371719.1 Mass: 115555 Score: 440 Matches: 11(11) Sequences: 11(11)
	microtubule-associated protein 4 isoform 50 [Homo sapiens]
	NP_001371724.1 Mass: 123767 Score: 440 Matches: 11(11) Sequences: 11(11)
	microtubule-associated protein 4 isoform 11 [Homo sapiens]
	NP_001371727.1 Mass: 120844 Score: 440 Matches: 11(11) Sequences: 11(11)
	microtubule-associated protein 4 isoform 18 [Homo sapiens]
	NP_001371729.1 Mass: 112205 Score: 440 Matches: 11(11) Sequences: 11(11)
	microtubule-associated protein 4 isoform 75 [Homo sapiens]
	NP_001371739.1 Mass: 113723 Score: 440 Matches: 11(11) Sequences: 11(11)
	microtubule-associated protein 4 isoform 65 [Homo sapiens]
	NP_001371743.1 Mass: 116999 Score: 440 Matches: 11(11) Sequences: 11(11)
	microtubule-associated protein 4 isoform 44 [Homo sapiens]
	NP_001371745.1 Mass: 118622 Score: 440 Matches: 11(11) Sequences: 11(11)
	microtubule-associated protein 4 isoform 27 [Homo sapiens]
	NP_001371761.1 Mass: 116656 Score: 440 Matches: 11(11) Sequences: 11(11)
	microtubule-associated protein 4 isoform 45 [Homo sapiens]
	NP_001371765.1 Mass: 116658 Score: 440 Matches: 11(11) Sequences: 11(11)
	microtubule-associated protein 4 isoform 48 [Homo sapiens]
	NP_001371770.1 Mass: 108017 Score: 440 Matches: 11(11) Sequences: 11(11)
	microtubule-associated protein 4 isoform 102 [Homo sapiens]
	NP_001371778.1 Mass: 119743 Score: 440 Matches: 11(11) Sequences: 11(11)
	microtubule-associated protein 4 isoform 21 [Homo sapiens]
	NP_001371782.1 Mass: 111295 Score: 440 Matches: 11(11) Sequences: 11(11)
	microtubule-associated protein 4 isoform 85 [Homo sapiens]
	NP_001371786.1 Mass: 109983 Score: 440 Matches: 11(11) Sequences: 11(11)
	microtubule-associated protein 4 isoform 90 [Homo sapiens]
	NP_001371788.1 Mass: 109109 Score: 440 Matches: 11(11) Sequences: 11(11)
	microtubule-associated protein 4 isoform 98 [Homo sapiens]
	NP_001371803.1 Mass: 113903 Score: 440 Matches: 11(11) Sequences: 11(11)
	microtubule-associated protein 4 isoform 64 [Homo sapiens]
	NP_001371821.1 Mass: 117748 Score: 440 Matches: 11(11) Sequences: 11(11)
	microtubule-associated protein 4 isoform 37 [Homo sapiens]
	NP_001372593.1 Mass: 237393 Score: 440 Matches: 11(11) Sequences: 11(11)
	microtubule-associated protein 4 isoform 9 [Homo sapiens]
	NP_001372604.1 Mass: 118090 Score: 440 Matches: 11(11) Sequences: 11(11)
	microtubule-associated protein 4 isoform 34 [Homo sapiens]
	NP_001372610.1 Mass: 118831 Score: 440 Matches: 11(11) Sequences: 11(11)
	microtubule-associated protein 4 isoform 25 [Homo sapiens]
	NP_001372613.1 Mass: 115481 Score: 440 Matches: 11(11) Sequences: 11(11)
	microtubule-associated protein 4 isoform 53 [Homo sapiens]
	KAI2529367.1 Mass: 245265 Score: 440 Matches: 11(11) Sequences: 11(11)
	microtubule associated protein 4 [Homo sapiens]
	KAI4029426.1 Mass: 245306 Score: 440 Matches: 11(11) Sequences: 11(11)
	microtubule associated protein 4 [Homo sapiens]
	XP_011532006.1 Mass: 246712 Score: 440 Matches: 11(11) Sequences: 11(11)
	microtubule-associated protein 4 isoform X4 [Homo sapiens]
	XP_011532007.1 Mass: 246384 Score: 440 Matches: 11(11) Sequences: 11(11)
	microtubule-associated protein 4 isoform X6 [Homo sapiens]
	XP_011532010.1 Mass: 244866 Score: 440 Matches: 11(11) Sequences: 11(11)
	microtubule-associated protein 4 isoform X11 [Homo sapiens]
	XP_016861886.1 Mass: 122249 Score: 440 Matches: 11(11) Sequences: 11(11)
	microtubule-associated protein 4 isoform X21 [Homo sapiens]
	XP_024309291.1 Mass: 248229 Score: 440 Matches: 11(11) Sequences: 11(11)
	microtubule-associated protein 4 isoform X1 [Homo sapiens]
	XP_047304074.1 Mass: 247138 Score: 440 Matches: 11(11) Sequences: 11(11)
	microtubule-associated protein 4 isoform X3 [Homo sapiens]
	XP_047304075.1 Mass: 246397 Score: 440 Matches: 11(11) Sequences: 11(11)
	microtubule-associated protein 4 isoform X7 [Homo sapiens]
	XP_047304077.1 Mass: 245292 Score: 440 Matches: 11(11) Sequences: 11(11)
	microtubule-associated protein 4 isoform X9 [Homo sapiens]
	XP_047304080.1 Mass: 244043 Score: 440 Matches: 11(11) Sequences: 11(11)
	microtubule-associated protein 4 isoform X13 [Homo sapiens]
	XP_047304081.1 Mass: 243460 Score: 440 Matches: 11(11) Sequences: 11(11)
	microtubule-associated protein 4 isoform X14 [Homo sapiens]
	XP_047304083.1 Mass: 241447 Score: 440 Matches: 11(11) Sequences: 11(11)
	microtubule-associated protein 4 isoform X16 [Homo sapiens]
	XP_047304084.1 Mass: 236339 Score: 440 Matches: 11(11) Sequences: 11(11)
	microtubule-associated protein 4 isoform X17 [Homo sapiens]
	XP_047304088.1 Mass: 116972 Score: 440 Matches: 11(11) Sequences: 11(11)
	microtubule-associated protein 4 isoform X22 [Homo sapiens]
	XP_047304089.1 Mass: 115140 Score: 440 Matches: 11(11) Sequences: 11(11)
	microtubule-associated protein 4 isoform X23 [Homo sapiens]
	NP_001372611.1 Mass: 245220 Score: 440 Matches: 11(11) Sequences: 11(11)
	microtubule-associated protein 4 isoform 6 [Homo sapiens]
	NP_001372616.1 Mass: 245206 Score: 440 Matches: 11(11) Sequences: 11(11)
	microtubule-associated protein 4 isoform 2 [Homo sapiens]
	NP_001372618.1 Mass: 241361 Score: 440 Matches: 11(11) Sequences: 11(11)
	microtubule-associated protein 4 isoform 7 [Homo sapiens]
	XP_011532005.1 Mass: 248143 Score: 440 Matches: 11(11) Sequences: 11(11)
	microtubule-associated protein 4 isoform X2 [Homo sapiens]
	XP_016861880.1 Mass: 246626 Score: 440 Matches: 11(11) Sequences: 11(11)
	microtubule-associated protein 4 isoform X5 [Homo sapiens]
	XP_047304076.1 Mass: 246297 Score: 440 Matches: 11(11) Sequences: 11(11)
	microtubule-associated protein 4 isoform X8 [Homo sapiens]
	XP_047304079.1 Mass: 244780 Score: 440 Matches: 11(11) Sequences: 11(11)
	microtubule-associated protein 4 isoform X12 [Homo sapiens]
	XP_047304082.1 Mass: 242452 Score: 440 Matches: 11(11) Sequences: 11(11)
	microtubule-associated protein 4 isoform X15 [Homo sapiens]
	XP_047304085.1 Mass: 236253 Score: 440 Matches: 11(11) Sequences: 11(11)
	microtubule-associated protein 4 isoform X18 [Homo sapiens]
19.	NP_000412.4 Mass: 58792 Score: 425 Matches: 12(12) Sequences: 12(12) emPAI: 0.86
	keratin, type I cytoskeletal 10 isoform 1 [Homo sapiens]
	Query	Observed	Mr(expt)	Mr(calc)	ppm	Miss	Score	Expect	Rank	Unique	Peptide
	4951	404.2030	806.3915	806.3923	-0.93	0	46	0.0039	1	U	R.LAADDFR.L
	4955	405.2234	808.4322	808.4330	-1.01	0	43	0.0037	1		R.LASYLDK.V
	5839	497.2518	992.4890	992.4927	-3.72	0	45	0.008	1	U	K.YENEVALR.Q
	6022	516.3029	1030.5912	1030.5910	0.14	0	50	0.0023	1	U	R.VLDELTLTK.A
	6353	553.7670	1105.5194	1105.5186	0.71	0	56	0.00048	1	U	K.VTMQNLNDR.L
	6364	555.2488	1108.4830	1108.4825	0.45	0	39	0.013	1	U	K.DAEAWFNEK.S
	6644	601.3127	1200.6108	1200.6098	0.80	0	79	3.4e-006	1	U	R.QSVEADINGLR.R
	6809	631.8015	1261.5885	1261.5899	-1.10	0	60	0.0002	1	U	R.SLLEGEGSSGGGGR.G
	7032	683.3234	1364.6322	1364.6320	0.11	0	53	0.00098	1	U	R.SQYEQLAEQNR.K
	7064	691.3283	1380.6421	1380.6408	0.89	0	61	0.0002	1	U	R.ALEESNYELEGK.I
	7094	695.8449	1389.6753	1389.6736	1.23	0	102	1.8e-008	1	U	K.QSLEASLAETEGR.Y
	7289	498.5833	1492.7279	1492.7270	0.64	1	43	0.02	1	U	R.SQYEQLAEQNRK.D
	Proteins matching the same set of peptides:
	CAA32649.1 Mass: 59492 Score: 425 Matches: 12(12) Sequences: 12(12)
	unnamed protein product [Homo sapiens]
	AAH34697.1 Mass: 58792 Score: 425 Matches: 12(12) Sequences: 12(12)
	Keratin 10 [Homo sapiens]
	EAW60681.1 Mass: 63308 Score: 425 Matches: 12(12) Sequences: 12(12)
	keratin 10 (epidermolytic hyperkeratosis; keratosis palmaris et plantaris), isoform CRA_b [Homo sapiens]
	NP_001366295.1 Mass: 63308 Score: 425 Matches: 12(12) Sequences: 12(12)
	keratin, type I cytoskeletal 10 isoform 2 [Homo sapiens]
	KAI2582860.1 Mass: 59588 Score: 425 Matches: 12(12) Sequences: 12(12)
	keratin 10 [Homo sapiens]
	KAI4049370.1 Mass: 58458 Score: 425 Matches: 12(12) Sequences: 12(12)
	keratin 10 [Homo sapiens]
20.	NP_004289.1 Mass: 148921 Score: 420 Matches: 10(10) Sequences: 10(10) emPAI: 0.23
	nuclear pore complex protein Nup155 isoform 2 [Homo sapiens]
	Query	Observed	Mr(expt)	Mr(calc)	ppm	Miss	Score	Expect	Rank	Unique	Peptide
	5143	422.2374	842.4602	842.4610	-0.87	0	55	0.00072	1	U	K.ANELLQR.S
	5763	489.2564	976.4983	976.4978	0.55	0	46	0.0082	1	U	K.GLQEFLDR.N
	5778	491.2720	980.5295	980.5291	0.43	0	39	0.023	1	U	K.AAPQSPSVPK.K
	7039	685.3941	1368.7736	1368.7725	0.85	0	67	3.8e-005	1	U	R.IQLQIQETLQR.Q
	7103	698.3343	1394.6540	1394.6525	1.09	0	87	4.2e-007	1	U	K.ELSDSVTLSSSDR.M
	7116	468.2549	1401.7428	1401.7405	1.66	1	40	0.036	1	U	K.KDPQGLGLHFYK.H
	7399	544.6265	1630.8576	1630.8566	0.57	0	44	0.012	1	U	R.LPPGFSASSTVEKPSK.V
	7407	837.4150	1672.8154	1672.8169	-0.89	0	81	2.2e-006	1	U	R.NSQFAGGPLGNPNTTAK.V
	7432	864.4747	1726.9348	1726.9326	1.28	0	71	1.8e-005	1	U	R.VASVSQNAIVSAAGNIAR.T
	7451	883.9294	1765.8442	1765.8417	1.41	0	74	1.1e-005	1	U	K.ISNQVDLSNVCAQYR.Q
	Proteins matching the same set of peptides:
	BAG59644.1 Mass: 151137 Score: 420 Matches: 10(10) Sequences: 10(10)
	unnamed protein product [Homo sapiens]
	NP_705618.1 Mass: 155100 Score: 420 Matches: 10(10) Sequences: 10(10)
	nuclear pore complex protein Nup155 isoform 1 [Homo sapiens]
	NP_001265241.1 Mass: 148000 Score: 420 Matches: 10(10) Sequences: 10(10)
	nuclear pore complex protein Nup155 isoform 3 [Homo sapiens]
	KAI2537264.1 Mass: 147986 Score: 420 Matches: 10(10) Sequences: 10(10)
	nucleoporin 155 [Homo sapiens]
	KAI2537265.1 Mass: 155086 Score: 420 Matches: 10(10) Sequences: 10(10)
	nucleoporin 155 [Homo sapiens]
	KAI2537266.1 Mass: 148907 Score: 420 Matches: 10(10) Sequences: 10(10)
	nucleoporin 155 [Homo sapiens]
21.	EAX00324.1 Mass: 108834 Score: 384 Matches: 8(8) Sequences: 8(8) emPAI: 0.25
	echinoderm microtubule associated protein like 4 [Homo sapiens]
	Query	Observed	Mr(expt)	Mr(calc)	ppm	Miss	Score	Expect	Rank	Unique	Peptide
	6221	536.8045	1071.5944	1071.5924	1.89	0	47	0.0067	1	U	R.IATGQIAGVDK.D
	6320	547.2853	1092.5561	1092.5564	-0.23	0	44	0.01	1	U	K.ADQFLVGTSR.N
	6861	428.2418	1281.7035	1281.7041	-0.49	0	82	1.3e-006	1	U	R.KPSHTSAVSIAGK.E
	7151	710.3603	1418.7060	1418.7041	1.33	0	53	0.0015	1	U	R.EIEVPDQYGTIR.A
	7154	710.8696	1419.7246	1419.7245	0.04	0	46	0.0076	1	U	K.DVIINQEGEYIK.M
	7177	478.5275	1432.5606	1432.5603	0.17	0	55	6.2e-005	1	U	K.SHNSWENSDDSR.N
	7435	577.3036	1728.8891	1728.8907	-0.92	0	84	1.5e-006	1	U	R.ASPSPQPSSQPLQIHR.Q
	8048	1127.2103	3378.6092	3378.6063	0.85	0	101	3e-008	1	U	K.APVSSTESVIQSNTPTPPPSQPLNETAEEESR.I
	Proteins matching the same set of peptides:
	AAG09279.2 Mass: 108835 Score: 384 Matches: 8(8) Sequences: 8(8)
	cytoplasmic protein [Homo sapiens]
	AAY15086.1 Mass: 101467 Score: 384 Matches: 8(8) Sequences: 8(8)
	unknown, partial [Homo sapiens]
	NP_061936.3 Mass: 108848 Score: 384 Matches: 8(8) Sequences: 8(8)
	echinoderm microtubule-associated protein-like 4 isoform a [Homo sapiens]
	KAI4034308.1 Mass: 108863 Score: 384 Matches: 8(8) Sequences: 8(8)
	EMAP like 4 [Homo sapiens]
22.	NP_000929.1 Mass: 133811 Score: 380 Matches: 12(12) Sequences: 12(12) emPAI: 0.32
	DNA-directed RNA polymerase II subunit RPB2 isoform 1 [Homo sapiens]
	Query	Observed	Mr(expt)	Mr(calc)	ppm	Miss	Score	Expect	Rank	Unique	Peptide
	4644	378.7215	755.4285	755.4290	-0.61	0	33	0.03	1	U	R.LNSPIGR.D
	5240	432.7334	863.4523	863.4501	2.54	0	44	0.0091	1	U	R.ALGFVSDR.D
	5502	455.7772	909.5399	909.5396	0.34	0	65	2.4e-005	1	U	R.GPIQILNR.Q
	5635	472.2698	942.5250	942.5247	0.36	0	73	1.2e-005	1	U	R.AGVSQVLNR.L
	5673	477.7267	953.4388	953.4389	-0.10	0	35	0.035	1	U	K.GTCGIQYR.Q
	5894	501.7772	1001.5398	1001.5393	0.43	0	49	0.0054	1	U	R.VSGDDVIIGK.T
	5952	510.2163	1018.4180	1018.4178	0.19	0	48	0.0005	1	U	K.YAYTGECR.S
	6677	607.3693	1212.7241	1212.7230	0.87	0	41	0.012	1	U	K.QEVPIIIVFR.A
	6762	415.9031	1244.6876	1244.6877	-0.10	0	42	0.016	1	U	R.LTFASTLSHLR.R
	7387	527.9233	1580.7480	1580.7471	0.59	0	52	0.0027	1	U	K.GFDQEEVFEKPTR.E
	7455	887.9349	1773.8553	1773.8533	1.12	0	63	0.00017	1	U	K.GEIGDATPFNDAVNVQK.I
	7958	933.1276	2796.3610	2796.3566	1.59	0	82	3.4e-006	1	U	R.IVEDAPPIDLQAEAQHASGEVEEPPR.Y
	Proteins matching the same set of peptides:
	BAG58155.1 Mass: 132941 Score: 380 Matches: 12(12) Sequences: 12(12)
	unnamed protein product [Homo sapiens]
	NP_001290198.1 Mass: 132971 Score: 380 Matches: 12(12) Sequences: 12(12)
	DNA-directed RNA polymerase II subunit RPB2 isoform 3 [Homo sapiens]
23.	NP_001035700.1 Mass: 119811 Score: 346 Matches: 9(9) Sequences: 9(9) emPAI: 0.26
	elongation factor-like GTPase 1 isoform 2 [Homo sapiens]
	Query	Observed	Mr(expt)	Mr(calc)	ppm	Miss	Score	Expect	Rank	Unique	Peptide
	4739	387.2496	772.4846	772.4847	-0.16	0	33	0.026	1	U	K.IFVLGPK.Y
	4799	390.2363	778.4581	778.4589	-0.99	0	25	0.041	1	U	R.VYAVLSK.R
	5516	457.2715	912.5283	912.5280	0.36	0	53	0.00073	1	U	R.ETITKPPK.V
	5671	477.2618	952.5089	952.5090	-0.07	0	38	0.025	1	U	K.LEQHLTGR.R
	5978	512.7768	1023.5390	1023.5389	0.12	0	38	0.03	1	U	K.YSPLEFLR.R
	6620	597.7856	1193.5566	1193.5564	0.16	0	79	2.6e-006	1	U	K.FEEQGASDLAK.E
	6668	606.3343	1210.6540	1210.6557	-1.41	0	75	6.5e-006	1	U	K.LPSPLDITAER.V
	7429	860.9496	1719.8846	1719.8832	0.83	0	72	2.2e-005	1	U	K.AVLPVAESFGFADEIR.K
	7496	932.0150	1862.0153	1862.0149	0.24	0	86	5.7e-007	1	U	K.NILEQINALTGTLFTSK.V
	Proteins matching the same set of peptides:
	NP_001309774.1 Mass: 125350 Score: 346 Matches: 9(9) Sequences: 9(9)
	elongation factor-like GTPase 1 isoform 1 [Homo sapiens]
	KAI2575569.1 Mass: 119811 Score: 346 Matches: 9(9) Sequences: 9(9)
	elongation factor like GTPase 1 [Homo sapiens]
	KAI2575570.1 Mass: 125350 Score: 346 Matches: 9(9) Sequences: 9(9)
	elongation factor like GTPase 1 [Homo sapiens]
	KAI4059171.1 Mass: 125336 Score: 346 Matches: 9(9) Sequences: 9(9)
	elongation factor like GTPase 1 [Homo sapiens]
	KAI4059172.1 Mass: 119797 Score: 346 Matches: 9(9) Sequences: 9(9)
	elongation factor like GTPase 1 [Homo sapiens]
24.	NP_001348.2 Mass: 140869 Score: 340 Matches: 9(9) Sequences: 8(8) emPAI: 0.19
	ATP-dependent RNA helicase A [Homo sapiens]
	Query	Observed	Mr(expt)	Mr(calc)	ppm	Miss	Score	Expect	Rank	Unique	Peptide
	6119	526.2499	1050.4852	1050.4869	-1.65	0	65	5.6e-005	1	U	K.EGETVEPYK.V
	6526	579.3325	1156.6505	1156.6492	1.07	0	47	0.006	1	U	K.VFDPVPVGVTK.V
	6598	396.1915	1185.5526	1185.5527	-0.09	0	(39)	0.017	1	U	K.YTQVGPDHNR.S
	6599	593.7837	1185.5528	1185.5527	0.12	0	44	0.0057	1	U	K.YTQVGPDHNR.S
	6695	407.9117	1220.7133	1220.7128	0.37	0	52	0.00053	1	U	R.TPLHEIALSIK.L
	7017	679.3480	1356.6815	1356.6820	-0.36	0	57	0.00054	1	U	R.AAECNIVVTQPR.R
	7304	501.9356	1502.7850	1502.7841	0.58	0	56	0.00071	1	U	R.GISHVIVDEIHER.D
	7568	657.6902	1970.0487	1970.0473	0.75	0	62	0.00019	1	U	K.AIEPPPLDAVIEAEHTLR.E
	7643	1081.9928	2161.9710	2161.9665	2.11	0	49	0.0026	1	U	K.AENNSEVGASGYGVPGPTWDR.G
	Proteins matching the same set of peptides:
	AAB48855.1 Mass: 141980 Score: 340 Matches: 9(9) Sequences: 8(8)
	RNA helicase A [Homo sapiens]
	CAA71668.1 Mass: 140788 Score: 340 Matches: 9(9) Sequences: 8(8)
	nuclear DNA helicase II, partial [Homo sapiens]
	EAW91137.1 Mass: 114045 Score: 340 Matches: 9(9) Sequences: 8(8)
	DEAH (Asp-Glu-Ala-His) box polypeptide 9, isoform CRA_a [Homo sapiens]
25.	CAA40655.1 Mass: 131387 Score: 339 Matches: 8(8) Sequences: 8(8) emPAI: 0.20
	pm5 protein [Homo sapiens]
	Query	Observed	Mr(expt)	Mr(calc)	ppm	Miss	Score	Expect	Rank	Unique	Peptide
	5907	503.2722	1004.5299	1004.5291	0.79	0	40	0.035	1	U	R.ITFDVAPSR.L
	6387	559.8065	1117.5985	1117.5979	0.53	1	50	0.0031	1	U	K.VVLSSQDKDK.S
	6602	593.8070	1185.5995	1185.5989	0.46	0	48	0.0043	1	U	R.EQQLAEIEAR.R
	6694	407.8915	1220.6527	1220.6514	1.11	0	38	0.04	1	U	R.HHVLGTITTDK.M
	7058	689.8939	1377.7732	1377.7729	0.23	0	62	8.9e-005	1	U	K.GQPLGPAGVQVSLR.N
	7216	725.8759	1449.7371	1449.7351	1.39	0	98	4.9e-008	1	U	K.GASSPLITVFTDDK.G
	7341	765.8554	1529.6961	1529.6958	0.26	0	92	1e-007	1	U	R.ALGQAASDNSGPEDAK.R
	7637	718.0248	2151.0527	2151.0484	1.99	0	43	0.018	1	U	K.GAYSVGPLHSDLEYTVTSQK.E
	Proteins matching the same set of peptides:
	NP_055102.3 Mass: 134239 Score: 339 Matches: 8(8) Sequences: 8(8)
	nodal modulator 1 precursor [Homo sapiens]
	KAI2577273.1 Mass: 139453 Score: 339 Matches: 8(8) Sequences: 8(8)
	NODAL modulator 1 [Homo sapiens]
26.	NP_000217.2 Mass: 62027 Score: 337 Matches: 9(9) Sequences: 9(9) emPAI: 0.55
	keratin, type I cytoskeletal 9 [Homo sapiens]
	Query	Observed	Mr(expt)	Mr(calc)	ppm	Miss	Score	Expect	Rank	Unique	Peptide
	4955	405.2234	808.4322	808.4330	-1.01	0	43	0.0037	1		R.LASYLDK.V
	6150	530.7857	1059.5569	1059.5560	0.79	0	47	0.0063	1	U	K.TLLDIDNTR.M
	6260	541.2512	1080.4878	1080.4870	0.75	0	41	0.012	1	U	K.STMQELNSR.L
	6401	561.2958	1120.5770	1120.5764	0.54	0	47	0.0044	1	U	R.QEYEQLIAK.N
	6523	579.3000	1156.5854	1156.5836	1.54	0	40	0.022	1	U	R.QGVDADINGLR.Q
	6660	603.8060	1205.5974	1205.5962	1.01	0	42	0.019	1	U	R.QVLDNLTMEK.S
	6725	616.8036	1231.5926	1231.5906	1.68	0	100	2.2e-008	1	U	R.SGGGGGGGLGSGGSIR.S
	6733	618.2682	1234.5218	1234.5215	0.30	0	68	1e-005	1	U	R.FSSSSGYGGGSSR.V
	7876	837.3815	2509.1226	2509.1245	-0.75	0	73	7.5e-006	1	U	K.EIETYHNLLEGGQEDFESSGAGK.I
	Proteins matching the same set of peptides:
	EAW60744.1 Mass: 57526 Score: 337 Matches: 9(9) Sequences: 9(9)
	keratin 9 (epidermolytic palmoplantar keratoderma) [Homo sapiens]
	CAA82315.1 Mass: 62092 Score: 337 Matches: 9(9) Sequences: 9(9)
	cytokeratin 9 [Homo sapiens]
27.	AAC35008.1 Mass: 110309 Score: 325 Matches: 12(12) Sequences: 12(12) emPAI: 0.39
	cellular apoptosis susceptibility protein [Homo sapiens]
	Query	Observed	Mr(expt)	Mr(calc)	ppm	Miss	Score	Expect	Rank	Unique	Peptide
	4932	402.7051	803.3956	803.3960	-0.45	0	46	0.0042	1	U	R.AACDLVR.G
	5229	431.2159	860.4173	860.4174	-0.12	0	38	0.033	1	U	K.LSTACPGR.V
	5508	456.2359	910.4573	910.4583	-1.04	0	45	0.006	1	U	K.VCASVTFK.N
	5672	477.3050	952.5955	952.5957	-0.15	0	37	0.0084	1	U	K.IIIPEIQK.V
	5805	493.7141	985.4137	985.4141	-0.45	0	36	0.011	1	U	K.YDEEFQR.Y
	5823	495.2931	988.5716	988.5705	1.04	0	51	0.0014	1	U	R.LLQAFLER.G
	6217	536.3319	1070.6493	1070.6488	0.42	0	47	0.0036	1	U	K.IPGLLGVFQK.L
	6394	560.2881	1118.5616	1118.5608	0.78	0	47	0.0066	1	U	K.SNELWTEIK.L
	6395	560.7596	1119.5046	1119.5044	0.19	0	48	0.0023	1	U	R.DLEGSDIDTR.R
	6566	586.8347	1171.6548	1171.6561	-1.11	0	52	0.0019	1	U	K.QLSDAISIIGR.E
	7273	741.3574	1480.7002	1480.6980	1.47	0	68	3.8e-005	1	U	K.SQICDNAALYAQK.Y
	7408	837.9961	1673.9777	1673.9756	1.27	0	50	0.00065	1	U	K.LVLDAFALPLTNLFK.A
	Proteins matching the same set of peptides:
	NP_001244742.1 Mass: 110346 Score: 325 Matches: 12(12) Sequences: 12(12)
	exportin-2 [Macaca mulatta]
	NP_001349691.1 Mass: 107709 Score: 325 Matches: 12(12) Sequences: 12(12)
	exportin-2 isoform 3 [Homo sapiens]
28.	AAH00401.2 Mass: 100034 Score: 271 Matches: 7(7) Sequences: 7(7) emPAI: 0.24
	SF3B2 protein, partial [Homo sapiens]
	Query	Observed	Mr(expt)	Mr(calc)	ppm	Miss	Score	Expect	Rank	Unique	Peptide
	5956	510.7278	1019.4410	1019.4407	0.30	0	46	0.0021	1	U	K.TEEEEIDR.T
	6007	514.7909	1027.5672	1027.5662	1.02	0	58	0.00037	1	U	R.AAVLLEQER.Q
	6100	524.2585	1046.5024	1046.5033	-0.80	0	39	0.037	1	U	-.ATEHPEPPK.A
	6426	565.2960	1128.5774	1128.5775	-0.10	0	63	0.00012	1	U	K.KPGDLSDELR.I
	6743	619.8464	1237.6782	1237.6779	0.27	0	63	9.7e-005	1	U	K.LAEIGAPIQGNR.E
	6929	657.8308	1313.6471	1313.6463	0.60	0	90	2.2e-007	1	U	R.VGEPVALSEEER.L
	7132	470.2421	1407.7045	1407.7034	0.75	0	42	0.021	1	U	K.LTIHGDLYYEGK.E
	Proteins matching the same set of peptides:
	NP_006833.2 Mass: 100165 Score: 271 Matches: 7(7) Sequences: 7(7)
	splicing factor 3B subunit 2 [Homo sapiens]
	AAH53577.1 Mass: 98055 Score: 271 Matches: 7(7) Sequences: 7(7)
	SF3B2 protein, partial [Homo sapiens]
	EAW74493.1 Mass: 89753 Score: 271 Matches: 7(7) Sequences: 7(7)
	splicing factor 3b, subunit 2, 145kDa, isoform CRA_c [Homo sapiens]
	EAW74494.1 Mass: 93882 Score: 271 Matches: 7(7) Sequences: 7(7)
	splicing factor 3b, subunit 2, 145kDa, isoform CRA_d [Homo sapiens]
	BAF83539.1 Mass: 100094 Score: 271 Matches: 7(7) Sequences: 7(7)
	unnamed protein product [Homo sapiens]
	XP_005273783.1 Mass: 100066 Score: 271 Matches: 7(7) Sequences: 7(7)
	splicing factor 3B subunit 2 isoform X2 [Homo sapiens]
	XP_008952351.1 Mass: 100037 Score: 271 Matches: 7(7) Sequences: 7(7)
	splicing factor 3B subunit 2 isoform X3 [Pan paniscus]
	XP_009421777.1 Mass: 99938 Score: 271 Matches: 7(7) Sequences: 7(7)
	splicing factor 3B subunit 2 isoform X4 [Pan troglodytes]
29.	EAX02046.1 Mass: 131420 Score: 263 Matches: 5(5) Sequences: 5(5) emPAI: 0.12
	polymerase (DNA directed), gamma, isoform CRA_b [Homo sapiens]
	Query	Observed	Mr(expt)	Mr(calc)	ppm	Miss	Score	Expect	Rank	Unique	Peptide
	5455	453.2560	904.4975	904.4978	-0.37	0	36	0.047	1	U	K.TATTVGISR.E
	5947	509.2651	1016.5157	1016.5138	1.83	0	52	0.0019	1	U	R.LTQQEAAEK.A
	6649	602.3043	1202.5941	1202.5931	0.79	0	61	0.00022	1	U	R.LSDEGEWLVR.E
	6814	632.8729	1263.7312	1263.7299	1.00	0	61	0.00011	1	U	R.AAVPGQPLALTAR.G
	7473	910.9660	1819.9174	1819.9138	1.98	0	126	8.2e-011	1	U	K.LPTGTTLESAGVVCPYR.A
	Proteins matching the same set of peptides:
	BAA12223.1 Mass: 139730 Score: 263 Matches: 5(5) Sequences: 5(5)
	mitochondrial DNA polymerase gamma [Homo sapiens]
	AAM77583.1 Mass: 139601 Score: 263 Matches: 5(5) Sequences: 5(5)
	polymerase (DNA directed), gamma [Homo sapiens]
	BAF83970.1 Mass: 139545 Score: 263 Matches: 5(5) Sequences: 5(5)
	unnamed protein product [Homo sapiens]
	ADP90867.1 Mass: 139503 Score: 263 Matches: 5(5) Sequences: 5(5)
	DNA polymerase subunit gamma-1 [Homo sapiens]
	ADP90871.1 Mass: 139454 Score: 263 Matches: 5(5) Sequences: 5(5)
	DNA polymerase subunit gamma-1 [Homo sapiens]
	ADP90884.1 Mass: 139420 Score: 263 Matches: 5(5) Sequences: 5(5)
	DNA polymerase subunit gamma-1 [Homo sapiens]
	NP_001119603.1 Mass: 139473 Score: 263 Matches: 5(5) Sequences: 5(5)
	DNA polymerase subunit gamma-1 [Homo sapiens]
	KAI2575773.1 Mass: 138961 Score: 263 Matches: 5(5) Sequences: 5(5)
	DNA polymerase gamma, catalytic subunit [Homo sapiens]
	KAI2575775.1 Mass: 116762 Score: 263 Matches: 5(5) Sequences: 5(5)
	DNA polymerase gamma, catalytic subunit, partial [Homo sapiens]
30.	NP_001952.1 Mass: 95277 Score: 244 Matches: 6(6) Sequences: 6(6) emPAI: 0.21
	elongation factor 2 [Homo sapiens]
	Query	Observed	Mr(expt)	Mr(calc)	ppm	Miss	Score	Expect	Rank	Unique	Peptide
	5931	507.2540	1012.4934	1012.4938	-0.31	0	37	0.036	1	U	K.GEGQLGPAER.A
	6301	546.2961	1090.5777	1090.5771	0.56	0	53	0.0016	1	U	M.VNFTVDQIR.A
	6361	554.3247	1106.6349	1106.6336	1.17	0	56	0.00034	1	U	R.VFSGLVSTGLK.V
	6408	562.2871	1122.5595	1122.5591	0.42	0	67	5e-005	1	U	K.STLTDSLVCK.A
	7057	689.8622	1377.7099	1377.7075	1.79	0	60	0.00035	1	U	R.CLYASVLTAQPR.L
	7571	659.9969	1976.9688	1976.9666	1.12	0	58	0.00059	1	U	R.GHVFEESQVAGTPMFVVK.A
31.	BAA32301.2 Mass: 120805 Score: 202 Matches: 5(5) Sequences: 5(5) emPAI: 0.13
	KIAA0456 protein [Homo sapiens]
	Query	Observed	Mr(expt)	Mr(calc)	ppm	Miss	Score	Expect	Rank	Unique	Peptide
	5642	473.7332	945.4518	945.4516	0.25	0	58	0.00039	1	U	R.SPDSTANVR.I
	6406	562.2726	1122.5307	1122.5306	0.15	0	50	0.0024	1	U	R.FVQVSEDSGR.L
	6844	637.8339	1273.6532	1273.6514	1.39	0	82	2.4e-006	1	U	R.VSGSQVEVNDIK.N
	7278	743.3702	1484.7259	1484.7246	0.91	0	44	0.016	1	U	K.SEIEVISEPPEEK.V
	7405	555.6428	1663.9065	1663.9046	1.13	0	48	0.0043	1	U	K.TIIIQHENIFPSPR.E
	Proteins matching the same set of peptides:
	NP_056141.2 Mass: 120795 Score: 202 Matches: 5(5) Sequences: 5(5)
	SLIT-ROBO Rho GTPase-activating protein 2 isoform a [Homo sapiens]
	CAH73674.1 Mass: 110341 Score: 202 Matches: 5(5) Sequences: 5(5)
	SLIT-ROBO Rho GTPase activating protein 2, partial [Homo sapiens]
	NP_001164108.1 Mass: 120667 Score: 202 Matches: 5(5) Sequences: 5(5)
	SLIT-ROBO Rho GTPase-activating protein 2 isoform c [Homo sapiens]
	NP_001364373.1 Mass: 110557 Score: 202 Matches: 5(5) Sequences: 5(5)
	SLIT-ROBO Rho GTPase-activating protein 2 isoform e [Homo sapiens]
	NP_001364374.1 Mass: 96316 Score: 202 Matches: 5(5) Sequences: 5(5)
	SLIT-ROBO Rho GTPase-activating protein 2 isoform f [Homo sapiens]
	NP_001364375.1 Mass: 96188 Score: 202 Matches: 5(5) Sequences: 5(5)
	SLIT-ROBO Rho GTPase-activating protein 2 isoform g [Homo sapiens]
	KAI2521179.1 Mass: 120776 Score: 202 Matches: 5(5) Sequences: 5(5)
	SLIT-ROBO Rho GTPase activating protein 2 [Homo sapiens]
	KAI2521180.1 Mass: 120648 Score: 202 Matches: 5(5) Sequences: 5(5)
	SLIT-ROBO Rho GTPase activating protein 2 [Homo sapiens]
	XP_011507656.1 Mass: 122242 Score: 202 Matches: 5(5) Sequences: 5(5)
	SLIT-ROBO Rho GTPase-activating protein 2 isoform X1 [Homo sapiens]
	XP_011507657.1 Mass: 122114 Score: 202 Matches: 5(5) Sequences: 5(5)
	SLIT-ROBO Rho GTPase-activating protein 2 isoform X2 [Homo sapiens]
	XP_024301782.1 Mass: 118622 Score: 202 Matches: 5(5) Sequences: 5(5)
	SLIT-ROBO Rho GTPase-activating protein 2 isoform X3 [Homo sapiens]
	XP_045251928.1 Mass: 112005 Score: 202 Matches: 5(5) Sequences: 5(5)
	SLIT-ROBO Rho GTPase-activating protein 2 isoform X5 [Macaca fascicularis]
	XP_047272487.1 Mass: 110429 Score: 202 Matches: 5(5) Sequences: 5(5)
	SLIT-ROBO Rho GTPase-activating protein 2 isoform X5 [Homo sapiens]
32.	CAE45852.1 Mass: 124876 Score: 191 Matches: 6(6) Sequences: 6(6) emPAI: 0.16
	hypothetical protein [Homo sapiens]
	Query	Observed	Mr(expt)	Mr(calc)	ppm	Miss	Score	Expect	Rank	Unique	Peptide
	4247	343.2152	684.4158	684.4170	-1.75	0	25	0.037	1	U	K.SVPAALK.A
	4527	366.7158	731.4171	731.4178	-0.91	0	46	0.0016	1	U	K.QSLTVGK.V
	5773	490.7558	979.4971	979.4974	-0.34	0	40	0.021	1	U	K.VIAYNSEGK.S
	6569	587.3149	1172.6153	1172.6149	0.33	0	64	0.00016	1	U	K.GQIAGGINTGSAK.I
	6842	637.3016	1272.5887	1272.5874	1.05	0	54	0.00067	1	U	K.YDGEDLAYTVK.N
	7521	949.4877	1896.9609	1896.9581	1.46	0	48	0.005	1	U	K.VTSYIINNLQPDTTYR.I
	Proteins matching the same set of peptides:
	CAI45989.1 Mass: 131796 Score: 191 Matches: 6(6) Sequences: 6(6)
	hypothetical protein [Homo sapiens]
	NP_055738.3 Mass: 125741 Score: 191 Matches: 6(6) Sequences: 6(6)
	fibronectin type-III domain-containing protein 3A isoform 2 [Homo sapiens]
	NP_001073141.1 Mass: 131767 Score: 191 Matches: 6(6) Sequences: 6(6)
	fibronectin type-III domain-containing protein 3A isoform 1 [Homo sapiens]
	KAI4063302.1 Mass: 131737 Score: 191 Matches: 6(6) Sequences: 6(6)
	fibronectin type III domain containing 3A [Homo sapiens]
	KAI4063306.1 Mass: 125711 Score: 191 Matches: 6(6) Sequences: 6(6)
	fibronectin type III domain containing 3A [Homo sapiens]
	XP_011533299.1 Mass: 124974 Score: 191 Matches: 6(6) Sequences: 6(6)
	fibronectin type-III domain-containing protein 3A isoform X2 [Homo sapiens]
33.	NP_006333.1 Mass: 90304 Score: 177 Matches: 4(4) Sequences: 4(4) emPAI: 0.14
	transforming acidic coiled-coil-containing protein 3 [Homo sapiens]
	Query	Observed	Mr(expt)	Mr(calc)	ppm	Miss	Score	Expect	Rank	Unique	Peptide
	6393	560.2859	1118.5572	1118.5567	0.44	1	44	0.012	1	U	K.TKENEELTR.I
	6756	622.7732	1243.5319	1243.5317	0.23	0	75	2.1e-006	1	U	K.APQEVEEDDGR.S
	6829	634.8044	1267.5943	1267.5932	0.88	0	69	2.7e-005	1	U	K.LEFDVSDGATSK.R
	6988	671.3784	1340.7423	1340.7412	0.84	0	49	0.0035	1	U	K.AQAEALALQASLR.K
	Proteins matching the same set of peptides:
	AAI11772.1 Mass: 90466 Score: 177 Matches: 4(4) Sequences: 4(4)
	Transforming, acidic coiled-coil containing protein 3 [Homo sapiens]
	KAI2533433.1 Mass: 89816 Score: 177 Matches: 4(4) Sequences: 4(4)
	transforming acidic coiled-coil containing protein 3 [Homo sapiens]
	KAI4024576.1 Mass: 90303 Score: 177 Matches: 4(4) Sequences: 4(4)
	transforming acidic coiled-coil containing protein 3 [Homo sapiens]
	KAI4024581.1 Mass: 89815 Score: 177 Matches: 4(4) Sequences: 4(4)
	transforming acidic coiled-coil containing protein 3 [Homo sapiens]
	XP_005247986.1 Mass: 90788 Score: 177 Matches: 4(4) Sequences: 4(4)
	transforming acidic coiled-coil-containing protein 3 isoform X1 [Homo sapiens]
34.	CAH18695.1 Mass: 123264 Score: 175 Matches: 6(6) Sequences: 6(6) emPAI: 0.16
	hypothetical protein [Homo sapiens]
	Query	Observed	Mr(expt)	Mr(calc)	ppm	Miss	Score	Expect	Rank	Unique	Peptide
	5002	410.2708	818.5269	818.5266	0.45	0	26	0.031	1	U	R.FLVTVIK.D
	5661	475.7998	949.5850	949.5848	0.27	0	44	0.0022	1	U	K.LISTLIYK.F
	6405	562.2506	1122.4867	1122.4863	0.32	0	50	0.00074	1	U	K.TSSDPTCVEK.E
	6692	611.2622	1220.5097	1220.5098	-0.04	0	55	0.0002	1	U	K.DFEEYPEHR.T
	6880	431.9191	1292.7356	1292.7354	0.16	0	43	0.0062	1	U	K.AVGHPFVIQLGR.I
	7563	656.3310	1965.9711	1965.9684	1.41	0	59	0.00043	1	U	R.ETLVYLTHLDYVDTER.I
	Proteins matching the same set of peptides:
	CAH56174.1 Mass: 123207 Score: 175 Matches: 6(6) Sequences: 6(6)
	hypothetical protein [Homo sapiens]
	NP_001253773.1 Mass: 123306 Score: 175 Matches: 6(6) Sequences: 6(6)
	exportin-1 [Macaca mulatta]
	XP_005575838.1 Mass: 118088 Score: 175 Matches: 6(6) Sequences: 6(6)
	exportin-1 isoform X2 [Macaca fascicularis]
	XP_032147912.1 Mass: 115835 Score: 175 Matches: 6(6) Sequences: 6(6)
	exportin-1 isoform X4 [Sapajus apella]
35.	NP_005947.3 Mass: 101467 Score: 174 Matches: 5(5) Sequences: 5(5) emPAI: 0.16
	C-1-tetrahydrofolate synthase, cytoplasmic isoform 1 [Homo sapiens]
	Query	Observed	Mr(expt)	Mr(calc)	ppm	Miss	Score	Expect	Rank	Unique	Peptide
	6331	549.3245	1096.6345	1096.6353	-0.71	0	38	0.015	1	U	K.GALALAQAVQR.A
	6550	583.2904	1164.5663	1164.5663	-0.00	0	49	0.0032	1	U	K.VVGDVAYDEAK.E
	6609	595.3070	1188.5995	1188.5986	0.70	0	49	0.0045	1	U	K.DVDGLTSINAGK.L
	7306	752.8614	1503.7082	1503.7053	1.96	0	62	0.00013	1	U	K.TDPTTLTDEEINR.F
	7398	815.9564	1629.8982	1629.8978	0.23	0	47	0.005	1	U	K.YVVVTGITPTPLGEGK.S
	Proteins matching the same set of peptides:
	BAH13795.1 Mass: 110428 Score: 174 Matches: 5(5) Sequences: 5(5)
	unnamed protein product [Homo sapiens]
	NP_001351766.1 Mass: 104644 Score: 174 Matches: 5(5) Sequences: 5(5)
	C-1-tetrahydrofolate synthase, cytoplasmic isoform 2 [Homo sapiens]
36.	NP_006199.2 Mass: 104857 Score: 171 Matches: 5(5) Sequences: 5(5) emPAI: 0.16
	ectonucleotide pyrophosphatase/phosphodiesterase family member 1 [Homo sapiens]
	Query	Observed	Mr(expt)	Mr(calc)	ppm	Miss	Score	Expect	Rank	Unique	Peptide
	5908	503.7346	1005.4546	1005.4549	-0.30	0	43	0.0083	1	U	R.CDSLENLR.Q
	6009	514.8016	1027.5886	1027.5913	-2.68	1	45	0.008	1	U	R.KEPVSDILK.L
	6571	587.7734	1173.5322	1173.5302	1.69	0	41	0.0098	1	U	K.THLPTFSQED.-
	7066	691.8222	1381.6298	1381.6302	-0.28	0	48	0.0022	1	U	K.YYSFNYEGIAR.N
	7524	636.3267	1905.9583	1905.9585	-0.08	0	66	0.00011	1	U	R.ITDVEHITGLSFYQQR.K
	Proteins matching the same set of peptides:
	BAG37385.1 Mass: 99805 Score: 171 Matches: 5(5) Sequences: 5(5)
	unnamed protein product [Homo sapiens]
	EAW48042.1 Mass: 105539 Score: 171 Matches: 5(5) Sequences: 5(5)
	ectonucleotide pyrophosphatase/phosphodiesterase 1, isoform CRA_b, partial [Homo sapiens]
	AAA63237.1 Mass: 99865 Score: 171 Matches: 5(5) Sequences: 5(5)
	plasma cell membrane glycoprotein PC-1 [Homo sapiens]
37.	NP_004981.2 Mass: 101052 Score: 169 Matches: 6(6) Sequences: 6(6) emPAI: 0.20
	methionine--tRNA ligase, cytoplasmic [Homo sapiens]
	Query	Observed	Mr(expt)	Mr(calc)	ppm	Miss	Score	Expect	Rank	Unique	Peptide
	4524	366.2183	730.4221	730.4225	-0.46	0	31	0.045	1	U	R.AAETVLK.Q
	6193	533.7678	1065.5210	1065.5203	0.62	0	54	0.00099	1	U	K.QPQPSPAEGR.A
	6682	608.8124	1215.6102	1215.6095	0.58	0	58	0.00042	1	U	K.LENDQIESLR.Q
	6759	415.5537	1243.6394	1243.6408	-1.13	1	58	0.00048	1	U	K.ADKNEVAAEVAK.L
	7188	478.9369	1433.7889	1433.7878	0.79	0	41	0.021	1	U	K.QLAVAEGKPPEAPK.G
	7468	902.4568	1802.8990	1802.8952	2.15	0	43	0.02	1	U	R.TLPGSDWTPNAQFITR.S
	Proteins matching the same set of peptides:
	AAH15011.1 Mass: 100822 Score: 169 Matches: 6(6) Sequences: 6(6)
	MARS protein, partial [Homo sapiens]
	CAA64381.1 Mass: 101065 Score: 169 Matches: 6(6) Sequences: 6(6)
	yeast methionyl-tRNA synthetase homolog [Homo sapiens]
	BAF83546.1 Mass: 101080 Score: 169 Matches: 6(6) Sequences: 6(6)
	unnamed protein product [Homo sapiens]
	BAD96487.1 Mass: 101036 Score: 169 Matches: 6(6) Sequences: 6(6)
	methionine-tRNA synthetase variant, partial [Homo sapiens]
38.	BAH13678.1 Mass: 73037 Score: 168 Matches: 4(4) Sequences: 4(4) emPAI: 0.18
	unnamed protein product [Homo sapiens]
	Query	Observed	Mr(expt)	Mr(calc)	ppm	Miss	Score	Expect	Rank	Unique	Peptide
	5946	509.2643	1016.5139	1016.5138	0.11	0	43	0.015	1		R.SQQTLDTPK.T
	6939	659.8098	1317.6051	1317.6048	0.17	0	50	0.0021	1		R.ESTPGDSPSTVNK.L
	7400	826.9343	1651.8541	1651.8529	0.71	0	71	2.7e-005	1		K.SQPEPSPVLSQLSQR.Q
	7519	632.9971	1895.9696	1895.9701	-0.27	0	56	0.00075	1	U	R.GAQEKPQISAAQSTQPQK.Q
39.	AAA31004.1 Mass: 16703 Score: 168 Matches: 4(4) Sequences: 4(4) emPAI: 1.03
	Na+, K+ -ATPase alpha subunit, partial [Sus scrofa]
	Query	Observed	Mr(expt)	Mr(calc)	ppm	Miss	Score	Expect	Rank	Unique	Peptide
	5032	414.2347	826.4549	826.4549	0.00	0	36	0.021	1		R.AAVPDAVGK.C
	5934	507.7739	1013.5332	1013.5328	0.45	0	44	0.0069	1	U	R.CSSILIHGK.E
	6806	631.3434	1260.6723	1260.6714	0.75	0	63	0.00015	1		K.IVEIPFNSTNK.Y
	7967	945.4672	2833.3797	2833.3770	0.95	1	73	2.8e-005	1		K.EQPLDEELKDAFQNAYLELGGLGER.V
40.	EAW58475.1 Mass: 96041 Score: 165 Matches: 4(4) Sequences: 4(4) emPAI: 0.14
	hCG1811260, isoform CRA_a [Homo sapiens]
	Query	Observed	Mr(expt)	Mr(calc)	ppm	Miss	Score	Expect	Rank	Unique	Peptide
	5946	509.2643	1016.5139	1016.5138	0.11	0	43	0.015	1		R.SQQTLDTPK.T
	6441	568.7710	1135.5274	1135.5258	1.46	0	53	0.00091	1	U	K.GGYAGSSQAPNK.S
	6939	659.8098	1317.6051	1317.6048	0.17	0	50	0.0021	1		R.ESTPGDSPSTVNK.L
	7400	826.9343	1651.8541	1651.8529	0.71	0	71	2.7e-005	1		K.SQPEPSPVLSQLSQR.Q
	Proteins matching the same set of peptides:
	EAW58476.1 Mass: 80632 Score: 165 Matches: 4(4) Sequences: 4(4)
	hCG1811260, isoform CRA_b [Homo sapiens]
	BAG61228.1 Mass: 90276 Score: 165 Matches: 4(4) Sequences: 4(4)
	unnamed protein product [Homo sapiens]
	BAG63966.1 Mass: 107564 Score: 165 Matches: 4(4) Sequences: 4(4)
	unnamed protein product [Homo sapiens]
	BAG64527.1 Mass: 87872 Score: 165 Matches: 4(4) Sequences: 4(4)
	unnamed protein product [Homo sapiens]
	BAA96015.1 Mass: 77963 Score: 165 Matches: 4(4) Sequences: 4(4)
	KIAA1491 protein, partial [Homo sapiens]
	NP_001356988.2 Mass: 117044 Score: 165 Matches: 4(4) Sequences: 4(4)
	ubiquitin-associated protein 2 isoform 1 [Homo sapiens]
	NP_001356993.2 Mass: 107525 Score: 165 Matches: 4(4) Sequences: 4(4)
	ubiquitin-associated protein 2 isoform 8 [Homo sapiens]
	NP_001356995.2 Mass: 112949 Score: 165 Matches: 4(4) Sequences: 4(4)
	ubiquitin-associated protein 2 isoform 6 [Homo sapiens]
	NP_001356996.2 Mass: 111620 Score: 165 Matches: 4(4) Sequences: 4(4)
	ubiquitin-associated protein 2 isoform 7 [Homo sapiens]
	KAI2552421.1 Mass: 117072 Score: 165 Matches: 4(4) Sequences: 4(4)
	ubiquitin associated protein 2 [Homo sapiens]
	KAI4006955.1 Mass: 117059 Score: 165 Matches: 4(4) Sequences: 4(4)
	ubiquitin associated protein 2 [Homo sapiens]
41.	NP_005981.3 Mass: 112065 Score: 151 Matches: 4(4) Sequences: 4(4) emPAI: 0.12
	serine/threonine-protein kinase 10 [Homo sapiens]
	Query	Observed	Mr(expt)	Mr(calc)	ppm	Miss	Score	Expect	Rank	Unique	Peptide
	5059	416.2321	830.4497	830.4498	-0.08	0	41	0.021	1	U	K.ETGALAAAK.V
	6503	578.3169	1154.6192	1154.6183	0.80	0	47	0.0036	1	U	K.SDPPTLLTPSK.W
	6831	634.8157	1267.6168	1267.6156	0.90	0	59	0.00047	1	U	K.ALDESHNQNLK.E
	7111	700.3732	1398.7318	1398.7289	2.03	0	68	3.7e-005	1	U	R.GLTEPQIQVVCR.Q
	Proteins matching the same set of peptides:
	XP_047273584.1 Mass: 93073 Score: 151 Matches: 4(4) Sequences: 4(4)
	serine/threonine-protein kinase 10 isoform X2 [Homo sapiens]
	XP_047273585.1 Mass: 88219 Score: 151 Matches: 4(4) Sequences: 4(4)
	serine/threonine-protein kinase 10 isoform X3 [Homo sapiens]
42.	NP_000414.2 Mass: 65393 Score: 137 Matches: 4(4) Sequences: 4(4) emPAI: 0.20
	keratin, type II cytoskeletal 2 epidermal [Homo sapiens]
	Query	Observed	Mr(expt)	Mr(calc)	ppm	Miss	Score	Expect	Rank	Unique	Peptide
	5745	487.2690	972.5233	972.5240	-0.64	0	49	0.0041	1		K.IEISELNR.V
	6192	533.7625	1065.5105	1065.5090	1.33	1	48	0.0033	1		K.YEDEINKR.T
	6965	665.3225	1328.6303	1328.6320	-1.27	0	53	0.0013	1	U	K.NVQDAIADAEQR.G
	7260	738.3966	1474.7785	1474.7780	0.38	0	58	0.00071	1		R.FLEQQNQVLQTK.W
	Proteins matching the same set of peptides:
	AAB81946.1 Mass: 65825 Score: 137 Matches: 4(4) Sequences: 4(4)
	keratin 2e [Homo sapiens]
	KAI4066109.1 Mass: 65363 Score: 137 Matches: 4(4) Sequences: 4(4)
	keratin 2 [Homo sapiens]
43.	BAF82693.1 Mass: 74809 Score: 136 Matches: 3(3) Sequences: 3(3) emPAI: 0.13
	unnamed protein product [Homo sapiens]
	Query	Observed	Mr(expt)	Mr(calc)	ppm	Miss	Score	Expect	Rank	Unique	Peptide
	6785	625.8337	1249.6528	1249.6514	1.14	0	60	0.0003	1	U	K.TSQTSLTASINK.L
	6813	632.7760	1263.5374	1263.5368	0.55	0	66	1.8e-005	1	U	K.DAFASTSEGHDK.T
	6863	642.2732	1282.5319	1282.5313	0.48	0	45	0.0017	1	U	R.GIEFEDESSDR.D
	Proteins matching the same set of peptides:
	NP_001362978.1 Mass: 74908 Score: 136 Matches: 3(3) Sequences: 3(3)
	soluble lamin-associated protein of 75 kDa isoform 1 [Homo sapiens]
	NP_001362982.1 Mass: 64985 Score: 136 Matches: 3(3) Sequences: 3(3)
	soluble lamin-associated protein of 75 kDa isoform 2 [Homo sapiens]
	NP_001362983.1 Mass: 54487 Score: 136 Matches: 3(3) Sequences: 3(3)
	soluble lamin-associated protein of 75 kDa isoform 3 [Homo sapiens]
	KAI2537911.1 Mass: 68013 Score: 136 Matches: 3(3) Sequences: 3(3)
	family with sequence similarity 169 member A [Homo sapiens]
	XP_047273039.1 Mass: 79397 Score: 136 Matches: 3(3) Sequences: 3(3)
	soluble lamin-associated protein of 75 kDa isoform X1 [Homo sapiens]
	XP_047273043.1 Mass: 60551 Score: 136 Matches: 3(3) Sequences: 3(3)
	soluble lamin-associated protein of 75 kDa isoform X3 [Homo sapiens]
44.	NP_001035887.1 Mass: 49437 Score: 127 Matches: 3(3) Sequences: 3(3) emPAI: 0.20
	monocarboxylate transporter 4 [Homo sapiens]
	Query	Observed	Mr(expt)	Mr(calc)	ppm	Miss	Score	Expect	Rank	Unique	Peptide
	6596	593.3091	1184.6036	1184.6037	-0.12	0	42	0.015	1	U	M.GGAVVDEGPTGVK.A
	7122	468.9245	1403.7516	1403.7521	-0.37	0	72	1.5e-005	1	U	K.LHKPPADSGVDLR.E
	7169	713.8388	1425.6631	1425.6623	0.53	0	46	0.0046	1	U	K.EPQPEVAAAEEEK.L
45.	NP_002201.2 Mass: 115964 Score: 126 Matches: 3(3) Sequences: 3(3) emPAI: 0.08
	integrin alpha-V isoform 1 preproprotein [Homo sapiens]
	Query	Observed	Mr(expt)	Mr(calc)	ppm	Miss	Score	Expect	Rank	Unique	Peptide
	5768	490.2514	978.4883	978.4883	0.04	0	47	0.0052	1	U	K.YNNQLATR.T
	7202	721.9026	1441.7906	1441.7889	1.20	0	67	4.5e-005	1	U	K.LQEVGQVSVSLQR.A
	7219	726.3464	1450.6783	1450.6763	1.43	0	63	9.3e-005	1	U	R.EPVGTCFLQDGTK.T
	Proteins matching the same set of peptides:
	AAG03000.1 Mass: 115954 Score: 126 Matches: 3(3) Sequences: 3(3)
	vitronectin receptor alpha polypeptide [Homo sapiens]
	AAA36808.1 Mass: 115978 Score: 126 Matches: 3(3) Sequences: 3(3)
	vitronectin alpha subunit precursor [Homo sapiens]
	AAI44101.1 Mass: 112167 Score: 126 Matches: 3(3) Sequences: 3(3)
	ITGAV protein [Homo sapiens]
	ABQ59037.1 Mass: 116032 Score: 126 Matches: 3(3) Sequences: 3(3)
	ITGAV protein [Homo sapiens]
	BAG63819.1 Mass: 52652 Score: 126 Matches: 3(3) Sequences: 3(3)
	unnamed protein product [Homo sapiens]
	BAD93131.1 Mass: 121600 Score: 126 Matches: 3(3) Sequences: 3(3)
	integrin alpha-V precursor variant, partial [Homo sapiens]
	NP_001138471.2 Mass: 111061 Score: 126 Matches: 3(3) Sequences: 3(3)
	integrin alpha-V isoform 2 precursor [Homo sapiens]
	NP_001138472.2 Mass: 112187 Score: 126 Matches: 3(3) Sequences: 3(3)
	integrin alpha-V isoform 3 precursor [Homo sapiens]
	KAI2526070.1 Mass: 112201 Score: 126 Matches: 3(3) Sequences: 3(3)
	integrin subunit alpha V [Homo sapiens]
	KAI2526071.1 Mass: 111075 Score: 126 Matches: 3(3) Sequences: 3(3)
	integrin subunit alpha V [Homo sapiens]
46.	Q5VTE0.1 Mass: 50153 Score: 120 Matches: 4(4) Sequences: 4(4) emPAI: 0.27
	PUTATIVE PSEUDOGENE: RecName: Full=Putative elongation factor 1-alpha-like 3; Short=EF-1-alpha-like 3; AltName: Full=Eukaryotic elongation factor 1 A-like 3; Short=eEF1A-like 3; AltName: Full=Eukaryotic translation elongation factor 1 alpha-1 pseudo
	Query	Observed	Mr(expt)	Mr(calc)	ppm	Miss	Score	Expect	Rank	Unique	Peptide
	5753	488.2795	974.5444	974.5437	0.76	0	38	0.045	1	U	R.LPLQDVYK.I
	5987	513.3090	1024.6035	1024.6030	0.52	0	51	0.00076	1	U	K.IGGIGTVPVGR.V
	7121	468.9138	1403.7195	1403.7197	-0.21	0	45	0.0093	1	U	K.YYVTIIDAPGHR.D
	7390	530.2986	1587.8739	1587.8733	0.38	0	55	0.00092	1	U	K.THINIVVIGHVDSGK.S
	Proteins matching the same set of peptides:
	CAA34756.1 Mass: 50095 Score: 120 Matches: 4(4) Sequences: 4(4)
	unnamed protein product [Homo sapiens]
	BAG60202.1 Mass: 42569 Score: 120 Matches: 4(4) Sequences: 4(4)
	unnamed protein product [Homo sapiens]
	AAH71619.1 Mass: 47839 Score: 120 Matches: 4(4) Sequences: 4(4)
	EEF1A1 protein [Homo sapiens]
	AAH71727.1 Mass: 50153 Score: 120 Matches: 4(4) Sequences: 4(4)
	Eukaryotic translation elongation factor 1 alpha 1 [Homo sapiens]
	AAH71841.1 Mass: 50091 Score: 120 Matches: 4(4) Sequences: 4(4)
	Eukaryotic translation elongation factor 1 alpha 1 [Homo sapiens]
	BAF85328.1 Mass: 50169 Score: 120 Matches: 4(4) Sequences: 4(4)
	unnamed protein product [Homo sapiens]
	BAD96235.1 Mass: 50093 Score: 120 Matches: 4(4) Sequences: 4(4)
	eukaryotic translation elongation factor 1 alpha 1 variant, partial [Homo sapiens]
	BAD96243.1 Mass: 50167 Score: 120 Matches: 4(4) Sequences: 4(4)
	eukaryotic translation elongation factor 1 alpha 1 variant, partial [Homo sapiens]
	BAD96271.1 Mass: 50110 Score: 120 Matches: 4(4) Sequences: 4(4)
	eukaryotic translation elongation factor 1 alpha 1 variant, partial [Homo sapiens]
	BAD96702.1 Mass: 50079 Score: 120 Matches: 4(4) Sequences: 4(4)
	eukaryotic translation elongation factor 1 alpha 1 variant, partial [Homo sapiens]
	BAD96750.1 Mass: 50079 Score: 120 Matches: 4(4) Sequences: 4(4)
	eukaryotic translation elongation factor 1 alpha 1 variant, partial [Homo sapiens]
	BAD96766.1 Mass: 50081 Score: 120 Matches: 4(4) Sequences: 4(4)
	eukaryotic translation elongation factor 1 alpha 1 variant, partial [Homo sapiens]
	KAI2542927.1 Mass: 47853 Score: 120 Matches: 4(4) Sequences: 4(4)
	eukaryotic translation elongation factor 1 alpha 1 [Homo sapiens]
	WP_094948604.1 Mass: 50109 Score: 120 Matches: 4(4) Sequences: 4(4)
	MULTISPECIES: translation elongation factor EF-1 subunit alpha [Gammaproteobacteria]
47.	NP_000468.1 Mass: 69321 Score: 119 Matches: 3(3) Sequences: 3(3) emPAI: 0.14
	albumin preproprotein [Homo sapiens]
	Query	Observed	Mr(expt)	Mr(calc)	ppm	Miss	Score	Expect	Rank	Unique	Peptide
	4863	395.2389	788.4633	788.4644	-1.30	0	36	0.018	1	U	K.LVTDLTK.V
	6444	569.7520	1137.4895	1137.4907	-1.06	0	51	0.00057	1	U	K.CCTESLVNR.R
	7317	756.4255	1510.8364	1510.8355	0.58	0	77	4.2e-006	1	U	K.VPQVSTPTLVEVSR.N
	Proteins matching the same set of peptides:
	AAF01333.1 Mass: 69180 Score: 119 Matches: 3(3) Sequences: 3(3)
	serum albumin precursor [Homo sapiens]
	EAX05666.1 Mass: 68568 Score: 119 Matches: 3(3) Sequences: 3(3)
	albumin, isoform CRA_h [Homo sapiens]
	EAX05669.1 Mass: 47257 Score: 119 Matches: 3(3) Sequences: 3(3)
	albumin, isoform CRA_k [Homo sapiens]
	AAN17825.1 Mass: 69349 Score: 119 Matches: 3(3) Sequences: 3(3)
	serum albumin [Homo sapiens]
	CAH18185.1 Mass: 69357 Score: 119 Matches: 3(3) Sequences: 3(3)
	hypothetical protein [Homo sapiens]
	CAA23754.1 Mass: 69321 Score: 119 Matches: 3(3) Sequences: 3(3)
	serum albumin [Homo sapiens]
	AAG35503.1 Mass: 56745 Score: 119 Matches: 3(3) Sequences: 3(3)
	PRO2619 [Homo sapiens]
	BAG37325.1 Mass: 69348 Score: 119 Matches: 3(3) Sequences: 3(3)
	unnamed protein product [Homo sapiens]
	AAH41789.1 Mass: 47330 Score: 119 Matches: 3(3) Sequences: 3(3)
	ALB protein [Homo sapiens]
	BAG60658.1 Mass: 70317 Score: 119 Matches: 3(3) Sequences: 3(3)
	unnamed protein product [Homo sapiens]
	BAG60674.1 Mass: 59535 Score: 119 Matches: 3(3) Sequences: 3(3)
	unnamed protein product [Homo sapiens]
	AEE60908.1 Mass: 66488 Score: 119 Matches: 3(3) Sequences: 3(3)
	albumin, partial [Homo sapiens]
	BAF85444.1 Mass: 69222 Score: 119 Matches: 3(3) Sequences: 3(3)
	unnamed protein product [Homo sapiens]
	AAA98798.1 Mass: 69181 Score: 119 Matches: 3(3) Sequences: 3(3)
	alloalbumin Venezia [Homo sapiens]
	KAI2534612.1 Mass: 56175 Score: 119 Matches: 3(3) Sequences: 3(3)
	albumin [Homo sapiens]
	KAI2534615.1 Mass: 52025 Score: 119 Matches: 3(3) Sequences: 3(3)
	albumin [Homo sapiens]
48.	NP_055448.1 Mass: 133420 Score: 115 Matches: 3(3) Sequences: 3(3) emPAI: 0.07
	RNA polymerase-associated protein CTR9 homolog isoform 1 [Homo sapiens]
	Query	Observed	Mr(expt)	Mr(calc)	ppm	Miss	Score	Expect	Rank	Unique	Peptide
	6337	550.7612	1099.5079	1099.5080	-0.12	0	53	0.00058	1	U	R.TNPGCPAEVR.L
	7467	601.9223	1802.7451	1802.7442	0.47	0	48	0.00062	1	U	K.GEEGSDDDETENGPKPK.K
	7472	607.2778	1818.8115	1818.8092	1.24	0	46	0.0047	1	U	R.RPSGSEQSDNESVQSGR.S
	Proteins matching the same set of peptides:
	BAF84483.1 Mass: 133448 Score: 115 Matches: 3(3) Sequences: 3(3)
	unnamed protein product [Homo sapiens]
	NP_001333208.1 Mass: 130686 Score: 115 Matches: 3(3) Sequences: 3(3)
	RNA polymerase-associated protein CTR9 homolog isoform 2 [Homo sapiens]
49.	EAX04206.1 Mass: 136171 Score: 110 Matches: 3(3) Sequences: 3(3) emPAI: 0.07
	exportin 5, isoform CRA_a [Homo sapiens]
	Query	Observed	Mr(expt)	Mr(calc)	ppm	Miss	Score	Expect	Rank	Unique	Peptide
	6312	546.8554	1091.6963	1091.6954	0.79	0	46	0.00046	1	U	R.DPLLLAIIPK.Y
	6642	601.2432	1200.4719	1200.4717	0.16	0	35	0.008	1	U	K.TDSPSCEYSR.F
	7433	864.9388	1727.8630	1727.8631	-0.08	0	60	0.00039	1	U	K.AGGFVVGYTSSGNPIFR.N
	Proteins matching the same set of peptides:
	EAX04207.1 Mass: 102587 Score: 110 Matches: 3(3) Sequences: 3(3)
	exportin 5, isoform CRA_b [Homo sapiens]
	AAH09969.2 Mass: 104639 Score: 110 Matches: 3(3) Sequences: 3(3)
	XPO5 protein, partial [Homo sapiens]
	BAG51767.1 Mass: 93977 Score: 110 Matches: 3(3) Sequences: 3(3)
	unnamed protein product [Homo sapiens]
	AAG53603.1 Mass: 136252 Score: 110 Matches: 3(3) Sequences: 3(3)
	RANBP21 [Homo sapiens]
	NP_065801.1 Mass: 136222 Score: 110 Matches: 3(3) Sequences: 3(3)
	exportin-5 [Homo sapiens]
	BAF84141.1 Mass: 136221 Score: 110 Matches: 3(3) Sequences: 3(3)
	unnamed protein product [Homo sapiens]
	BAA86605.3 Mass: 136250 Score: 110 Matches: 3(3) Sequences: 3(3)
	KIAA1291 protein [Homo sapiens]
50.	NP_004475.1 Mass: 65520 Score: 107 Matches: 2(2) Sequences: 2(2) emPAI: 0.10
	glypican-3 isoform 2 precursor [Homo sapiens]
	Query	Observed	Mr(expt)	Mr(calc)	ppm	Miss	Score	Expect	Rank	Unique	Peptide
	6859	641.3567	1280.6988	1280.6976	0.95	0	54	0.0012	1	U	K.GPEPVVSQIIDK.L
	7287	498.5830	1492.7272	1492.7270	0.13	0	70	3.7e-005	1	U	K.VAHVEHEETLSSR.R
	Proteins matching the same set of peptides:
	AAH35972.1 Mass: 65580 Score: 107 Matches: 2(2) Sequences: 2(2)
	Glypican 3 [Homo sapiens]
	AQN67628.1 Mass: 62286 Score: 107 Matches: 2(2) Sequences: 2(2)
	Glypican 3 [Homo sapiens]
	ABC72125.1 Mass: 59469 Score: 107 Matches: 2(2) Sequences: 2(2)
	glypican-3 splice variant B [Homo sapiens]
	ABC72126.1 Mass: 65552 Score: 107 Matches: 2(2) Sequences: 2(2)
	glypican-3 splice variant A [Homo sapiens]
	ABC72127.1 Mass: 68401 Score: 107 Matches: 2(2) Sequences: 2(2)
	glypican-3 splice variant C [Homo sapiens]
	NP_001158089.1 Mass: 68369 Score: 107 Matches: 2(2) Sequences: 2(2)
	glypican-3 isoform 1 precursor [Homo sapiens]
	NP_001158090.1 Mass: 63686 Score: 107 Matches: 2(2) Sequences: 2(2)
	glypican-3 isoform 3 precursor [Homo sapiens]
	NP_001158091.1 Mass: 59437 Score: 107 Matches: 2(2) Sequences: 2(2)
	glypican-3 isoform 4 precursor [Homo sapiens]
51.	NP_001546.2 Mass: 148839 Score: 101 Matches: 3(3) Sequences: 3(3) emPAI: 0.06
	immunoglobulin superfamily member 1 isoform 1 precursor [Homo sapiens]
	Query	Observed	Mr(expt)	Mr(calc)	ppm	Miss	Score	Expect	Rank	Unique	Peptide
	5924	506.2672	1010.5198	1010.5185	1.27	0	38	0.024	1	U	R.EAFFTIQR.M
	6035	518.7309	1035.4472	1035.4469	0.37	0	53	0.0003	1	U	K.DGSEIASSDR.S
	6751	621.3360	1240.6574	1240.6564	0.82	0	49	0.0021	1	U	K.TWASPVVTPGAR.V
	Proteins matching the same set of peptides:
	EAX11791.1 Mass: 91679 Score: 101 Matches: 3(3) Sequences: 3(3)
	immunoglobulin superfamily, member 1, isoform CRA_a [Homo sapiens]
	EAX11792.1 Mass: 149073 Score: 101 Matches: 3(3) Sequences: 3(3)
	immunoglobulin superfamily, member 1, isoform CRA_b [Homo sapiens]
	BAG58378.1 Mass: 85550 Score: 101 Matches: 3(3) Sequences: 3(3)
	unnamed protein product [Homo sapiens]
	CAA71535.1 Mass: 148842 Score: 101 Matches: 3(3) Sequences: 3(3)
	immunoglobulin-like domain-containing 1 [Homo sapiens]
	NP_001164432.1 Mass: 149329 Score: 101 Matches: 3(3) Sequences: 3(3)
	immunoglobulin superfamily member 1 isoform 3 precursor [Homo sapiens]
	NP_001164433.1 Mass: 147877 Score: 101 Matches: 3(3) Sequences: 3(3)
	immunoglobulin superfamily member 1 isoform 4 [Homo sapiens]
	KAI2600794.1 Mass: 138332 Score: 101 Matches: 3(3) Sequences: 3(3)
	immunoglobulin superfamily member 1 [Homo sapiens]
	XP_011529635.1 Mass: 140290 Score: 101 Matches: 3(3) Sequences: 3(3)
	immunoglobulin superfamily member 1 isoform X3 [Homo sapiens]
	XP_011529636.1 Mass: 128344 Score: 101 Matches: 3(3) Sequences: 3(3)
	immunoglobulin superfamily member 1 isoform X5 [Homo sapiens]
	XP_047298044.1 Mass: 139801 Score: 101 Matches: 3(3) Sequences: 3(3)
	immunoglobulin superfamily member 1 isoform X4 [Homo sapiens]
52.	BAB55198.1 Mass: 91913 Score: 96 Matches: 3(3) Sequences: 3(3) emPAI: 0.10
	unnamed protein product [Homo sapiens]
	Query	Observed	Mr(expt)	Mr(calc)	ppm	Miss	Score	Expect	Rank	Unique	Peptide
	6541	581.7652	1161.5158	1161.5150	0.77	0	56	0.00034	1	U	R.VSDSESEGPQK.G
	6943	661.2791	1320.5437	1320.5430	0.54	0	34	0.018	1	U	K.GPASDSETEDASR.H
	7389	792.9464	1583.8783	1583.8770	0.79	0	37	0.042	1	U	K.ILQELPSVSQETLK.H
	Proteins matching the same set of peptides:
	BAG57836.1 Mass: 82072 Score: 96 Matches: 3(3) Sequences: 3(3)
	unnamed protein product [Homo sapiens]
	BAG59414.1 Mass: 86646 Score: 96 Matches: 3(3) Sequences: 3(3)
	unnamed protein product [Homo sapiens]
	NP_060439.2 Mass: 91899 Score: 96 Matches: 3(3) Sequences: 3(3)
	protein IWS1 homolog [Homo sapiens]
	BAA91402.1 Mass: 54749 Score: 96 Matches: 3(3) Sequences: 3(3)
	unnamed protein product, partial [Homo sapiens]
	XP_005263764.1 Mass: 92416 Score: 96 Matches: 3(3) Sequences: 3(3)
	protein IWS1 homolog isoform X1 [Homo sapiens]
	XP_006712689.1 Mass: 92425 Score: 96 Matches: 3(3) Sequences: 3(3)
	protein IWS1 homolog isoform X2 [Homo sapiens]
	XP_011509752.1 Mass: 83437 Score: 96 Matches: 3(3) Sequences: 3(3)
	protein IWS1 homolog isoform X4 [Homo sapiens]
	XP_016859956.1 Mass: 91908 Score: 96 Matches: 3(3) Sequences: 3(3)
	protein IWS1 homolog isoform X3 [Homo sapiens]
	XP_016859957.1 Mass: 69343 Score: 96 Matches: 3(3) Sequences: 3(3)
	protein IWS1 homolog isoform X5 [Homo sapiens]
53.	CAD39009.3 Mass: 72066 Score: 93 Matches: 2(2) Sequences: 2(2) emPAI: 0.09
	hypothetical protein, partial [Homo sapiens]
	Query	Observed	Mr(expt)	Mr(calc)	ppm	Miss	Score	Expect	Rank	Unique	Peptide
	6845	637.8391	1273.6635	1273.6626	0.75	0	46	0.011	1	U	K.AISSTEAVLNNR.F
	7120	702.8519	1403.6892	1403.6892	-0.04	0	71	2.2e-005	1	U	R.EGSTQQLQTTSPK.V
	Proteins matching the same set of peptides:
	BAB55125.1 Mass: 74904 Score: 93 Matches: 2(2) Sequences: 2(2)
	unnamed protein product [Homo sapiens]
	CAI56708.1 Mass: 99991 Score: 93 Matches: 2(2) Sequences: 2(2)
	hypothetical protein, partial [Homo sapiens]
	EAW80594.1 Mass: 95367 Score: 93 Matches: 2(2) Sequences: 2(2)
	chromosome 13 open reading frame 10, isoform CRA_d [Homo sapiens]
	NP_001273561.1 Mass: 110956 Score: 93 Matches: 2(2) Sequences: 2(2)
	RNA-binding protein 26 isoform 2 [Homo sapiens]
	NP_001353664.1 Mass: 113527 Score: 93 Matches: 2(2) Sequences: 2(2)
	RNA-binding protein 26 isoform 4 [Homo sapiens]
	XP_005266554.1 Mass: 112461 Score: 93 Matches: 2(2) Sequences: 2(2)
	RNA-binding protein 26 isoform X14 [Homo sapiens]
	XP_006719920.1 Mass: 112333 Score: 93 Matches: 2(2) Sequences: 2(2)
	RNA-binding protein 26 isoform X15 [Homo sapiens]
	XP_011533481.1 Mass: 115412 Score: 93 Matches: 2(2) Sequences: 2(2)
	RNA-binding protein 26 isoform X1 [Homo sapiens]
	XP_011533484.1 Mass: 114857 Score: 93 Matches: 2(2) Sequences: 2(2)
	RNA-binding protein 26 isoform X4 [Homo sapiens]
	XP_011533486.1 Mass: 114305 Score: 93 Matches: 2(2) Sequences: 2(2)
	RNA-binding protein 26 isoform X8 [Homo sapiens]
	XP_011533488.1 Mass: 113750 Score: 93 Matches: 2(2) Sequences: 2(2)
	RNA-binding protein 26 isoform X11 [Homo sapiens]
	XP_011533497.1 Mass: 81288 Score: 93 Matches: 2(2) Sequences: 2(2)
	RNA-binding protein 26 isoform X46 [Homo sapiens]
	XP_016876185.1 Mass: 112285 Score: 93 Matches: 2(2) Sequences: 2(2)
	RNA-binding protein 26 isoform X18 [Homo sapiens]
	XP_016876186.1 Mass: 111778 Score: 93 Matches: 2(2) Sequences: 2(2)
	RNA-binding protein 26 isoform X21 [Homo sapiens]
	XP_018895252.1 Mass: 115189 Score: 93 Matches: 2(2) Sequences: 2(2)
	RNA-binding protein 26 isoform X1 [Gorilla gorilla gorilla]
	XP_024204081.1 Mass: 114083 Score: 93 Matches: 2(2) Sequences: 2(2)
	RNA-binding protein 26 isoform X7 [Pan troglodytes]
	XP_024204086.1 Mass: 112063 Score: 93 Matches: 2(2) Sequences: 2(2)
	RNA-binding protein 26 isoform X17 [Pan troglodytes]
	XP_047286459.1 Mass: 114634 Score: 93 Matches: 2(2) Sequences: 2(2)
	RNA-binding protein 26 isoform X6 [Homo sapiens]
	XP_047286465.1 Mass: 112618 Score: 93 Matches: 2(2) Sequences: 2(2)
	RNA-binding protein 26 isoform X16 [Homo sapiens]
	XP_047286467.1 Mass: 111906 Score: 93 Matches: 2(2) Sequences: 2(2)
	RNA-binding protein 26 isoform X19 [Homo sapiens]
	XP_047286472.1 Mass: 111227 Score: 93 Matches: 2(2) Sequences: 2(2)
	RNA-binding protein 26 isoform X26 [Homo sapiens]
	XP_047286473.1 Mass: 111511 Score: 93 Matches: 2(2) Sequences: 2(2)
	RNA-binding protein 26 isoform X27 [Homo sapiens]
	XP_047286475.1 Mass: 110799 Score: 93 Matches: 2(2) Sequences: 2(2)
	RNA-binding protein 26 isoform X29 [Homo sapiens]
	XP_047286478.1 Mass: 110671 Score: 93 Matches: 2(2) Sequences: 2(2)
	RNA-binding protein 26 isoform X31 [Homo sapiens]
	XP_047286479.1 Mass: 109890 Score: 93 Matches: 2(2) Sequences: 2(2)
	RNA-binding protein 26 isoform X32 [Homo sapiens]
	XP_047286480.1 Mass: 109762 Score: 93 Matches: 2(2) Sequences: 2(2)
	RNA-binding protein 26 isoform X33 [Homo sapiens]
	XP_047286483.1 Mass: 109335 Score: 93 Matches: 2(2) Sequences: 2(2)
	RNA-binding protein 26 isoform X36 [Homo sapiens]
	XP_047286485.1 Mass: 109207 Score: 93 Matches: 2(2) Sequences: 2(2)
	RNA-binding protein 26 isoform X38 [Homo sapiens]
	XP_047286486.1 Mass: 108783 Score: 93 Matches: 2(2) Sequences: 2(2)
	RNA-binding protein 26 isoform X39 [Homo sapiens]
	XP_047286487.1 Mass: 108655 Score: 93 Matches: 2(2) Sequences: 2(2)
	RNA-binding protein 26 isoform X40 [Homo sapiens]
	XP_047286489.1 Mass: 108228 Score: 93 Matches: 2(2) Sequences: 2(2)
	RNA-binding protein 26 isoform X42 [Homo sapiens]
	XP_047286490.1 Mass: 108100 Score: 93 Matches: 2(2) Sequences: 2(2)
	RNA-binding protein 26 isoform X43 [Homo sapiens]
54.	CAD38866.1 Mass: 102697 Score: 83 Matches: 3(3) Sequences: 3(3) emPAI: 0.09
	hypothetical protein [Homo sapiens]
	Query	Observed	Mr(expt)	Mr(calc)	ppm	Miss	Score	Expect	Rank	Unique	Peptide
	4871	395.7189	789.4232	789.4232	0.04	0	36	0.046	1	U	R.IQVSSEK.E
	5820	495.2486	988.4826	988.4825	0.15	0	53	0.00096	1	U	R.LAEAEETAR.T
	6749	620.8671	1239.7197	1239.7187	0.83	0	34	0.046	1	U	K.VQTLSNQPLLK.S
	Proteins matching the same set of peptides:
	BAG53111.1 Mass: 102866 Score: 83 Matches: 3(3) Sequences: 3(3)
	unnamed protein product [Homo sapiens]
	AAH65495.1 Mass: 102824 Score: 83 Matches: 3(3) Sequences: 3(3)
	KIAA1967 [Homo sapiens]
	NP_001349997.1 Mass: 102767 Score: 83 Matches: 3(3) Sequences: 3(3)
	cell cycle and apoptosis regulator protein 2 isoform 2 [Homo sapiens]
	NP_001380926.1 Mass: 102838 Score: 83 Matches: 3(3) Sequences: 3(3)
	cell cycle and apoptosis regulator protein 2 isoform 1 [Homo sapiens]
	XP_011542906.1 Mass: 98192 Score: 83 Matches: 3(3) Sequences: 3(3)
	cell cycle and apoptosis regulator protein 2 isoform X1 [Homo sapiens]
55.	NP_006507.2 Mass: 54049 Score: 81 Matches: 2(2) Sequences: 2(2) emPAI: 0.12
	solute carrier family 2, facilitated glucose transporter member 1 [Homo sapiens]
	Query	Observed	Mr(expt)	Mr(calc)	ppm	Miss	Score	Expect	Rank	Unique	Peptide
	5828	495.8029	989.5913	989.5910	0.33	0	41	0.01	1	U	K.VTILELFR.S
	6457	571.7781	1141.5417	1141.5404	1.17	0	61	0.00013	1	U	R.TFDEIASGFR.Q
	Proteins matching the same set of peptides:
	AAI21805.1 Mass: 54019 Score: 81 Matches: 2(2) Sequences: 2(2)
	Solute carrier family 2 (facilitated glucose transporter), member 1 [Homo sapiens]
	AAC28635.1 Mass: 37855 Score: 81 Matches: 2(2) Sequences: 2(2)
	glucose transporter glycoprotein, partial [Homo sapiens]
	AAA52571.1 Mass: 54083 Score: 81 Matches: 2(2) Sequences: 2(2)
	glucose transporter glycoprotein [Homo sapiens]
	BAG53842.1 Mass: 45839 Score: 81 Matches: 2(2) Sequences: 2(2)
	unnamed protein product [Homo sapiens]
	BAG59323.1 Mass: 47789 Score: 81 Matches: 2(2) Sequences: 2(2)
	unnamed protein product [Homo sapiens]
	BAF85480.1 Mass: 53799 Score: 81 Matches: 2(2) Sequences: 2(2)
	unnamed protein product [Homo sapiens]
	BAD92224.1 Mass: 56981 Score: 81 Matches: 2(2) Sequences: 2(2)
	solute carrier family 2 (facilitated glucose transporter), member 1 variant, partial [Homo sapiens]
56.	NP_001667.4 Mass: 115437 Score: 78 Matches: 2(2) Sequences: 2(2) emPAI: 0.05
	potassium-transporting ATPase alpha chain 2 isoform 2 [Homo sapiens]
	Query	Observed	Mr(expt)	Mr(calc)	ppm	Miss	Score	Expect	Rank	Unique	Peptide
	4572	372.2239	742.4333	742.4337	-0.58	0	56	0.00019	1	U	R.AAELLAR.D
	6292	544.3007	1086.5868	1086.5856	1.12	0	51	0.0026	1		K.LIIVEGCQR.Q
	Proteins matching the same set of peptides:
	AAC37589.2 Mass: 115825 Score: 78 Matches: 2(2) Sequences: 2(2)
	non-gastric H+,K+-ATPase [Homo sapiens]
	NP_001172014.1 Mass: 115979 Score: 78 Matches: 2(2) Sequences: 2(2)
	potassium-transporting ATPase alpha chain 2 isoform 1 [Homo sapiens]
57.	NP_000087.2 Mass: 122142 Score: 75 Matches: 2(2) Sequences: 2(2) emPAI: 0.05
	ceruloplasmin precursor [Homo sapiens]
	Query	Observed	Mr(expt)	Mr(calc)	ppm	Miss	Score	Expect	Rank	Unique	Peptide
	5930	507.2163	1012.4181	1012.4171	0.91	0	38	0.013	1	U	K.TYCSEPEK.V
	6789	627.2556	1252.4967	1252.4956	0.86	0	55	0.0001	1	U	K.DNEDFQESNR.M
	Proteins matching the same set of peptides:
	P00450.1 Mass: 122128 Score: 75 Matches: 2(2) Sequences: 2(2)
	RecName: Full=Ceruloplasmin; AltName: Full=Ferroxidase; Flags: Precursor [Homo sapiens]
	BAA08084.1 Mass: 115398 Score: 75 Matches: 2(2) Sequences: 2(2)
	ceruloplasmin, partial [Homo sapiens]
	BAH12988.1 Mass: 108753 Score: 75 Matches: 2(2) Sequences: 2(2)
	unnamed protein product [Homo sapiens]
	AAA51975.1 Mass: 97637 Score: 75 Matches: 2(2) Sequences: 2(2)
	ceruloplasmin, partial [Homo sapiens]
	EAW78883.1 Mass: 122924 Score: 75 Matches: 2(2) Sequences: 2(2)
	ceruloplasmin (ferroxidase), isoform CRA_b [Homo sapiens]
	EAW78884.1 Mass: 116685 Score: 75 Matches: 2(2) Sequences: 2(2)
	ceruloplasmin (ferroxidase), isoform CRA_c [Homo sapiens]
	BAF83908.1 Mass: 122095 Score: 75 Matches: 2(2) Sequences: 2(2)
	unnamed protein product [Homo sapiens]
	KAI2531947.1 Mass: 108737 Score: 75 Matches: 2(2) Sequences: 2(2)
	ceruloplasmin [Homo sapiens]
	XP_006713562.1 Mass: 125135 Score: 75 Matches: 2(2) Sequences: 2(2)
	ceruloplasmin isoform X2 [Homo sapiens]
	XP_006713563.1 Mass: 122588 Score: 75 Matches: 2(2) Sequences: 2(2)
	ceruloplasmin isoform X3 [Homo sapiens]
	XP_006713564.1 Mass: 122087 Score: 75 Matches: 2(2) Sequences: 2(2)
	ceruloplasmin isoform X5 [Homo sapiens]
	XP_011510737.1 Mass: 125581 Score: 75 Matches: 2(2) Sequences: 2(2)
	ceruloplasmin isoform X1 [Homo sapiens]
	XP_016861223.1 Mass: 122533 Score: 75 Matches: 2(2) Sequences: 2(2)
	ceruloplasmin isoform X4 [Homo sapiens]
	XP_016861224.1 Mass: 116038 Score: 75 Matches: 2(2) Sequences: 2(2)
	ceruloplasmin isoform X6 [Homo sapiens]
58.	AAH00062.1 Mass: 56576 Score: 73 Matches: 1(1) Sequences: 1(1) emPAI: 0.06
	Solute carrier family 1 (neutral amino acid transporter), member 5 [Homo sapiens]
	Query	Observed	Mr(expt)	Mr(calc)	ppm	Miss	Score	Expect	Rank	Unique	Peptide
	6341	551.7724	1101.5302	1101.5302	0.03	0	73	1e-005	1	U	R.GPAGDATVASEK.E
	Proteins matching the same set of peptides:
	NP_005619.1 Mass: 56562 Score: 73 Matches: 1(1) Sequences: 1(1)
	neutral amino acid transporter B(0) isoform 1 [Homo sapiens]
	AAD09812.1 Mass: 56404 Score: 73 Matches: 1(1) Sequences: 1(1)
	RD114/simian type D retrovirus receptor [Homo sapiens]
	AAD09814.1 Mass: 56547 Score: 73 Matches: 1(1) Sequences: 1(1)
	neutral amino acid transporter [Homo sapiens]
	BAH14917.1 Mass: 36584 Score: 73 Matches: 1(1) Sequences: 1(1)
	unnamed protein product [Homo sapiens]
	AAC50629.1 Mass: 56585 Score: 73 Matches: 1(1) Sequences: 1(1)
	neutral amino acid transporter B [Homo sapiens]
	BAG56938.1 Mass: 33702 Score: 73 Matches: 1(1) Sequences: 1(1)
	unnamed protein product [Homo sapiens]
	BAG61189.1 Mass: 36626 Score: 73 Matches: 1(1) Sequences: 1(1)
	unnamed protein product [Homo sapiens]
	AAK77026.1 Mass: 55239 Score: 73 Matches: 1(1) Sequences: 1(1)
	sodium-dependent neutral amino acid transporter type 2 truncated isoform, partial [Homo sapiens]
	BAD92975.1 Mass: 57354 Score: 73 Matches: 1(1) Sequences: 1(1)
	solute carrier family 1 (neutral amino acid transporter), member 5 variant, partial [Homo sapiens]
	NP_001138616.1 Mass: 33688 Score: 73 Matches: 1(1) Sequences: 1(1)
	neutral amino acid transporter B(0) isoform 2 [Homo sapiens]
	NP_001138617.1 Mass: 36612 Score: 73 Matches: 1(1) Sequences: 1(1)
	neutral amino acid transporter B(0) isoform 3 [Homo sapiens]
	KAI2591913.1 Mass: 39418 Score: 73 Matches: 1(1) Sequences: 1(1)
	solute carrier family 1 member 5 [Homo sapiens]
59.	AAH01090.2 Mass: 38869 Score: 72 Matches: 1(1) Sequences: 1(1) emPAI: 0.08
	MICAL-L1 protein, partial [Homo sapiens]
	Query	Observed	Mr(expt)	Mr(calc)	ppm	Miss	Score	Expect	Rank	Unique	Peptide
	6131	527.7991	1053.5836	1053.5818	1.67	0	72	1.1e-005	1	U	R.KPSPAASPATK.K
	Proteins matching the same set of peptides:
	CAH18362.1 Mass: 32950 Score: 72 Matches: 1(1) Sequences: 1(1)
	hypothetical protein [Homo sapiens]
	BAB33338.1 Mass: 85155 Score: 72 Matches: 1(1) Sequences: 1(1)
	KIAA1668 protein, partial [Homo sapiens]
	CAD38718.1 Mass: 70841 Score: 72 Matches: 1(1) Sequences: 1(1)
	hypothetical protein, partial [Homo sapiens]
	CAD39036.1 Mass: 91197 Score: 72 Matches: 1(1) Sequences: 1(1)
	hypothetical protein, partial [Homo sapiens]
	NP_203744.1 Mass: 93383 Score: 72 Matches: 1(1) Sequences: 1(1)
	MICAL-like protein 1 [Homo sapiens]
	XP_005261848.1 Mass: 94196 Score: 72 Matches: 1(1) Sequences: 1(1)
	MICAL-like protein 1 isoform X5 [Homo sapiens]
	XP_005261849.1 Mass: 93969 Score: 72 Matches: 1(1) Sequences: 1(1)
	MICAL-like protein 1 isoform X6 [Homo sapiens]
	XP_011528773.1 Mass: 100295 Score: 72 Matches: 1(1) Sequences: 1(1)
	MICAL-like protein 1 isoform X1 [Homo sapiens]
	XP_011528774.1 Mass: 100068 Score: 72 Matches: 1(1) Sequences: 1(1)
	MICAL-like protein 1 isoform X2 [Homo sapiens]
	XP_011528775.1 Mass: 99482 Score: 72 Matches: 1(1) Sequences: 1(1)
	MICAL-like protein 1 isoform X3 [Homo sapiens]
	XP_016884515.1 Mass: 69200 Score: 72 Matches: 1(1) Sequences: 1(1)
	MICAL-like protein 1 isoform X9 [Homo sapiens]
	XP_047297508.1 Mass: 99255 Score: 72 Matches: 1(1) Sequences: 1(1)
	MICAL-like protein 1 isoform X4 [Homo sapiens]
	XP_047297509.1 Mass: 93156 Score: 72 Matches: 1(1) Sequences: 1(1)
	MICAL-like protein 1 isoform X7 [Homo sapiens]
	XP_047297510.1 Mass: 90830 Score: 72 Matches: 1(1) Sequences: 1(1)
	MICAL-like protein 1 isoform X8 [Homo sapiens]
	XP_047297511.1 Mass: 62061 Score: 72 Matches: 1(1) Sequences: 1(1)
	MICAL-like protein 1 isoform X10 [Homo sapiens]
60.	NP_006039.2 Mass: 133190 Score: 70 Matches: 3(3) Sequences: 3(3) emPAI: 0.07
	ubiquitin conjugation factor E4 B isoform 2 [Homo sapiens]
	Query	Observed	Mr(expt)	Mr(calc)	ppm	Miss	Score	Expect	Rank	Unique	Peptide
	4679	381.2234	760.4322	760.4330	-1.07	0	36	0.028	1	U	K.STIAIEK.F
	4851	394.2312	786.4479	786.4487	-1.01	0	33	0.037	1	U	K.VEEIVAK.N
	6230	537.7626	1073.5107	1073.5101	0.54	0	64	5.7e-005	1	U	R.QSQLAQDER.V
	Proteins matching the same set of peptides:
	BAF85133.1 Mass: 133250 Score: 70 Matches: 3(3) Sequences: 3(3)
	unnamed protein product [Homo sapiens]
	NP_001099032.1 Mass: 146092 Score: 70 Matches: 3(3) Sequences: 3(3)
	ubiquitin conjugation factor E4 B isoform 1 [Homo sapiens]
	KAI2514972.1 Mass: 151499 Score: 70 Matches: 3(3) Sequences: 3(3)
	ubiquitination factor E4B [Homo sapiens]
	KAI2514973.1 Mass: 146126 Score: 70 Matches: 3(3) Sequences: 3(3)
	ubiquitination factor E4B [Homo sapiens]
	KAI2514974.1 Mass: 133224 Score: 70 Matches: 3(3) Sequences: 3(3)
	ubiquitination factor E4B [Homo sapiens]
	XP_005263479.1 Mass: 151465 Score: 70 Matches: 3(3) Sequences: 3(3)
	ubiquitin conjugation factor E4 B isoform X1 [Homo sapiens]
	XP_011538790.1 Mass: 139522 Score: 70 Matches: 3(3) Sequences: 3(3)
	ubiquitin conjugation factor E4 B isoform X3 [Homo sapiens]
	XP_016855524.1 Mass: 136856 Score: 70 Matches: 3(3) Sequences: 3(3)
	ubiquitin conjugation factor E4 B isoform X4 [Homo sapiens]
	XP_047283974.1 Mass: 145260 Score: 70 Matches: 3(3) Sequences: 3(3)
	ubiquitin conjugation factor E4 B isoform X2 [Homo sapiens]
61.	NP_002363.2 Mass: 131057 Score: 70 Matches: 1(1) Sequences: 1(1) emPAI: 0.02
	alpha-mannosidase 2 [Homo sapiens]
	Query	Observed	Mr(expt)	Mr(calc)	ppm	Miss	Score	Expect	Rank	Unique	Peptide
	7299	749.9160	1497.8175	1497.8150	1.63	0	70	2.1e-005	1	U	R.LLAENNEIISNIR.D
	Proteins matching the same set of peptides:
	BAA10017.1 Mass: 130970 Score: 70 Matches: 1(1) Sequences: 1(1)
	golgi alpha-mannosidaseII [Homo sapiens]
	AAI42657.1 Mass: 130954 Score: 70 Matches: 1(1) Sequences: 1(1)
	MAN2A1 protein [Homo sapiens]
	AAC50302.1 Mass: 131001 Score: 70 Matches: 1(1) Sequences: 1(1)
	alpha mannosidase II [Homo sapiens]
	XP_011541697.1 Mass: 102068 Score: 70 Matches: 1(1) Sequences: 1(1)
	alpha-mannosidase 2 isoform X3 [Homo sapiens]
	XP_016864961.1 Mass: 125399 Score: 70 Matches: 1(1) Sequences: 1(1)
	alpha-mannosidase 2 isoform X2 [Homo sapiens]
62.	NP_000283.1 Mass: 138320 Score: 67 Matches: 2(2) Sequences: 2(2) emPAI: 0.05
	phosphorylase b kinase regulatory subunit alpha, liver isoform [Homo sapiens]
	Query	Observed	Mr(expt)	Mr(calc)	ppm	Miss	Score	Expect	Rank	Unique	Peptide
	6801	630.8044	1259.5943	1259.5935	0.66	0	40	0.019	1	U	K.VPESDFQWPR.D
	6837	424.2346	1269.6819	1269.6830	-0.88	0	42	0.014	1	U	K.FAVHVESVLNR.V
	Proteins matching the same set of peptides:
	AAH14036.1 Mass: 138351 Score: 67 Matches: 2(2) Sequences: 2(2)
	Phosphorylase kinase, alpha 2 (liver) [Homo sapiens]
	XP_005274605.1 Mass: 136584 Score: 67 Matches: 2(2) Sequences: 2(2)
	phosphorylase b kinase regulatory subunit alpha, liver isoform isoform X2 [Homo sapiens]
	XP_005274607.1 Mass: 135362 Score: 67 Matches: 2(2) Sequences: 2(2)
	phosphorylase b kinase regulatory subunit alpha, liver isoform isoform X4 [Homo sapiens]
	XP_006724559.1 Mass: 139254 Score: 67 Matches: 2(2) Sequences: 2(2)
	phosphorylase b kinase regulatory subunit alpha, liver isoform isoform X1 [Homo sapiens]
	XP_011543839.1 Mass: 135704 Score: 67 Matches: 2(2) Sequences: 2(2)
	phosphorylase b kinase regulatory subunit alpha, liver isoform isoform X3 [Homo sapiens]
	XP_011543840.1 Mass: 101092 Score: 67 Matches: 2(2) Sequences: 2(2)
	phosphorylase b kinase regulatory subunit alpha, liver isoform isoform X10 [Homo sapiens]
	XP_016885069.1 Mass: 105230 Score: 67 Matches: 2(2) Sequences: 2(2)
	phosphorylase b kinase regulatory subunit alpha, liver isoform isoform X9 [Homo sapiens]
	XP_047298119.1 Mass: 134771 Score: 67 Matches: 2(2) Sequences: 2(2)
	phosphorylase b kinase regulatory subunit alpha, liver isoform isoform X5 [Homo sapiens]
	XP_047298120.1 Mass: 133034 Score: 67 Matches: 2(2) Sequences: 2(2)
[truncated: 1,025 more rows]

## Sheet: 4
Database : NCBIprot 20220703 (490684465 sequences; 189905115401 residues)
Taxonomy : Homo sapiens (human) (438061 sequences)
Enzyme : Trypsin
Variable modifications : Acetyl (Protein N-term),Oxidation (M),Gln->pyro-Glu (N-term Q),Carbamidomethyl (C)
Mass values : Monoisotopic
Protein Mass : Unrestricted
Peptide Mass Tolerance : ± 15 ppm
Fragment Mass Tolerance: ± 30 mmu
Max Missed Cleavages : 3
Instrument type : ESI-TRAP
Number of queries : 7894
Protein hits :	NP_001087.2	ATP-citrate synthase isoform 1 [Homo sapiens]
	AAA36025.1	90kDa heat shock protein [Homo sapiens]
	EAX00324.1	echinoderm microtubule associated protein like 4 [Homo sapiens]
	NP_000810.1	trifunctional purine biosynthetic protein adenosine-3 isoform 1 [Homo sapiens]
	AAG41947.1	keratin 1 [Homo sapiens]
	ABR25253.1	ubiquitin-activating enzyme 6 [Homo sapiens]
	NP_001609.2	poly [ADP-ribose] polymerase 1 [Homo sapiens]
	NP_000692.2	sodium/potassium-transporting ATPase subunit alpha-1 isoform a [Homo sapiens]
	NP_003325.2	ubiquitin-like modifier-activating enzyme 1 [Homo sapiens]
	AAB42010.1	Prt1 homolog [Homo sapiens]
	AAH02360.1	Elongation factor Tu GTP binding domain containing 2 [Homo sapiens]
	NP_004913.2	protein transport protein Sec24C [Homo sapiens]
	NP_000412.4	keratin, type I cytoskeletal 10 isoform 1 [Homo sapiens]
	NP_005339.3	heat shock protein HSP 90-alpha isoform 2 [Homo sapiens]
	BAG54384.1	unnamed protein product [Homo sapiens]
	NP_002262.4	importin-5 [Homo sapiens]
	AAC51317.1	karyopherin beta 3 [Homo sapiens]
	NP_004512.1	kinesin-1 heavy chain [Homo sapiens]
	NP_001952.1	elongation factor 2 [Homo sapiens]
	NP_006382.1	importin-7 [Homo sapiens]
	AAB21124.1	p50-NF-kappa B homolog [Homo sapiens]
	NP_000217.2	keratin, type I cytoskeletal 9 [Homo sapiens]
	NP_003676.2	far upstream element-binding protein 2 isoform 1 [Homo sapiens]
	AAH28604.3	Superkiller viralicidic activity 2-like 2 (S. cerevisiae) [Homo sapiens]
	NP_002385.3	4F2 cell-surface antigen heavy chain isoform c [Homo sapiens]
	NP_005546.2	keratin, type II cytoskeletal 6B [Homo sapiens]
	NP_000414.2	keratin, type II cytoskeletal 2 epidermal [Homo sapiens]
	NP_000170.1	DNA mismatch repair protein Msh6 isoform 1 [Homo sapiens]
	EAX10954.1	NCK-associated protein 1, isoform CRA_c [Homo sapiens]
	NP_003655.3	AP-3 complex subunit beta-1 isoform 1 [Homo sapiens]
	EAX05906.1	SEC31-like 1 (S. cerevisiae), isoform CRA_a [Homo sapiens]
	NP_004351.1	cadherin-1 isoform 1 preproprotein [Homo sapiens]
	AAL37479.1	KIAA1008 protein [Homo sapiens]
	NP_004078.2	disks large homolog 1 isoform 2 [Homo sapiens]
	NP_006507.2	solute carrier family 2, facilitated glucose transporter member 1 [Homo sapiens]
	AAH08715.1	MAP4 protein [Homo sapiens]
	AAP12522.1	zinc in-between-ring-finger ubiquitin-associated domain [Homo sapiens]
	AAH00263.1	Ubiquitin specific peptidase 10 [Homo sapiens]
	NP_000468.1	albumin preproprotein [Homo sapiens]
	CAA10334.1	Sec24A protein, partial [Homo sapiens]
	BAS02858.1	T cell receptor alpha chain V-J-region, partial [Homo sapiens]
	AAM00189.1	arsenite-resistant protein ASR2 [Homo sapiens]
	ELV10669.1	Tubulin alpha-4A chain, partial [Tupaia chinensis]
	NP_001667.4	potassium-transporting ATPase alpha chain 2 isoform 2 [Homo sapiens]
	Q9BWU0.1	RecName: Full=Kanadaptin; AltName: Full=Human lung cancer oncogene 3 protein; Short=HLC-3; AltName: Full=Kidney anion exchanger adapter protein; AltName: Full=Solute carrier family 4 anion exchanger member 1 adapter protein [Homo sapiens]
	BAH14636.1	unnamed protein product [Homo sapiens]
	NP_004475.1	glypican-3 isoform 2 precursor [Homo sapiens]
	AAH02343.3	NCL protein [Homo sapiens]
	AAD28756.2	sec24D protein [Homo sapiens]
	NP_002256.2	importin subunit beta-1 isoform 1 [Homo sapiens]
	NP_002732.3	serine/threonine-protein kinase N1 isoform 2 [Homo sapiens]
	AAH04882.4	POLR1B protein, partial [Homo sapiens]
	CAA68390.1	unnamed protein product [Homo sapiens]
	NP_000284.1	phosphorylase b kinase regulatory subunit beta isoform a [Homo sapiens]
	AAI37478.1	Adenosine deaminase, RNA-specific, B2 (RED2 homolog rat) [Homo sapiens]
	NP_004309.2	aspartyl/asparaginyl beta-hydroxylase isoform a [Homo sapiens]
	AAH60513.1	Plasminogen [Homo sapiens]
	NP_004386.3	drebrin isoform a [Homo sapiens]
	NP_002285.1	lysosome-associated membrane glycoprotein 2 isoform A precursor [Homo sapiens]
	XP_011528685.1	brain-specific angiogenesis inhibitor 1-associated protein 2-like protein 2 isoform X4 [Homo sapiens]
	EAX03348.1	valyl-tRNA synthetase like, isoform CRA_a [Homo sapiens]
	BAC04711.1	unnamed protein product [Homo sapiens]
	NP_003354.2	ubiquitin carboxyl-terminal hydrolase 4 isoform a [Homo sapiens]
	AAG24388.1	PP239 protein [Homo sapiens]
	CAC34107.1	T-cell receptor beta chain VJ region, partial [Homo sapiens]
	NP_001358488.1	MAL-like protein isoform 2 [Homo sapiens]
1.	NP_001087.2 Mass: 120762 Score: 1262 Matches: 36(36) Sequences: 32(32) emPAI: 1.31
	ATP-citrate synthase isoform 1 [Homo sapiens]
	Query	Observed	Mr(expt)	Mr(calc)	ppm	Miss	Score	Expect	Rank	Unique	Peptide
	4915	399.7578	797.5010	797.5011	-0.08	0	45	0.0017	1	U	K.LTLLNPK.G
	4946	400.7113	799.4080	799.4076	0.53	0	(42)	0.0056	1	U	R.ADEVAPAK.K
	4947	800.4161	799.4088	799.4076	1.55	0	55	0.00027	1	U	R.ADEVAPAK.K
	5080	414.7264	827.4383	827.4389	-0.64	0	39	0.015	1	U	K.LNPEDIK.K
	5147	421.1847	840.3548	840.3548	-0.09	0	40	0.0041	1	U	R.NCGSFTR.E
	5400	436.7575	871.5005	871.5015	-1.09	0	47	0.0069	1	U	K.LLVGVDEK.L
	5436	442.7092	883.4039	883.4035	0.41	0	46	0.0032	1	U	R.TASFSESR.A
	5546	451.7507	901.4868	901.4869	-0.05	0	62	0.00029	1	U	R.LGQEATVGK.A
	5577	454.2296	906.4447	906.4447	0.03	0	45	0.0067	1	U	R.YQDTPGVK.M
	5578	907.4528	906.4455	906.4447	0.86	0	(41)	0.018	1	U	R.YQDTPGVK.M
	5642	460.7445	919.4745	919.4763	-2.01	0	54	0.0012	1	U	R.FGGALDAAAK.M
	5761	475.7708	949.5271	949.5266	0.51	0	39	0.022	1	U	K.TILSLMTR.E
	5790	479.8024	957.5902	957.5899	0.31	0	44	0.0054	1	U	K.EILIPVFK.N
	6217	530.7569	1059.4992	1059.4985	0.67	0	45	0.0049	1	U	R.VTPDTDWAR.L
	6290	539.2788	1076.5431	1076.5437	-0.59	0	40	0.025	1	U	K.AIVWGMQTR.A
	6333	545.7679	1089.5213	1089.5203	0.94	0	58	0.00042	1	U	R.GGPNYQEGLR.V
	6447	377.2046	1128.5919	1128.5928	-0.72	0	(41)	0.024	1	U	K.EHEVTIFVR.R
	6448	565.3037	1128.5929	1128.5928	0.10	0	41	0.021	1	U	K.EHEVTIFVR.R
	6518	578.2703	1154.5260	1154.5278	-1.56	0	64	7.2e-005	1	U	K.VDATADYICK.V
	6532	579.8170	1157.6194	1157.6193	0.06	0	52	0.0027	1	U	K.HLLVHAPEDK.K
	6548	582.3194	1162.6242	1162.6234	0.74	0	43	0.013	1	U	K.DGVYVLDLAAK.V
	6854	655.8299	1309.6452	1309.6449	0.29	0	55	0.00096	1	U	K.FICTTSAIQNR.F
	6937	456.5852	1366.7338	1366.7357	-1.40	0	38	0.04	1	U	K.LYRPGSVAYVSR.S
	6976	699.4221	1396.8297	1396.8290	0.51	0	91	7.7e-008	1	U	K.LGLVGVNLTLDGVK.S
	7141	499.5889	1495.7449	1495.7453	-0.29	0	39	0.035	1	U	K.AKPAMPQDSVPSPR.S
	7159	754.3628	1506.7111	1506.7096	1.01	0	113	1.2e-009	1	U	R.SGGMSNELNNIISR.T
	7164	755.3636	1508.7126	1508.7107	1.26	0	107	5.2e-009	1	U	R.TTDGVYEGVAIGGDR.Y
	7179	760.3934	1518.7723	1518.7712	0.74	0	83	2e-006	1	U	K.IGNTGGMLDNILASK.L
	7261	838.8732	1675.7319	1675.7334	-0.92	0	39	0.017	1	U	R.AVQGMLDFDYVCSR.D
	7282	579.9933	1736.9582	1736.9573	0.51	1	43	0.0081	1	U	R.KHPEVDVLINFASLR.S
	7321	624.6857	1871.0352	1871.0339	0.67	0	77	4.4e-006	1	U	K.GVTIIGPATVGGIKPGCFK.I
	7347	644.3392	1929.9959	1929.9949	0.52	1	50	0.0035	1	U	R.DYQGPLKEHEVTIFVR.R
	7355	975.5568	1949.0990	1949.0986	0.20	0	116	3.5e-010	1	U	K.ILIIGGSIANFTNVAATFK.G
	7358	977.5037	1952.9928	1952.9884	2.25	0	64	0.00014	1	U	R.QHFPATPLLDYALEVEK.I
	7366	657.6799	1970.0178	1970.0149	1.46	0	(61)	0.00026	1	U	R.QHFPATPLLDYALEVEK.I
	7511	753.3509	2257.0308	2257.0288	0.91	0	47	0.004	1	U	R.EGDYVLFHHEGGVDVGDVDAK.A
	Proteins matching the same set of peptides:
	BAE06117.1 Mass: 124477 Score: 1262 Matches: 36(36) Sequences: 32(32)
	ACLY variant protein, partial [Homo sapiens]
	NP_001290203.1 Mass: 126138 Score: 1262 Matches: 36(36) Sequences: 32(32)
	ATP-citrate synthase isoform 3 [Homo sapiens]
2.	AAA36025.1 Mass: 83242 Score: 700 Matches: 17(17) Sequences: 17(17) emPAI: 0.86
	90kDa heat shock protein [Homo sapiens]
	Query	Observed	Mr(expt)	Mr(calc)	ppm	Miss	Score	Expect	Rank	Unique	Peptide
	4633	367.2263	732.4380	732.4382	-0.17	0	35	0.0038	1	U	K.SLVSVTK.E
	5090	415.2683	828.5221	828.5221	-0.09	0	46	0.0022	1	U	R.ALLFIPR.R
	6136	520.2503	1038.4861	1038.4869	-0.84	0	56	0.0004	1		R.YESLTDPSK.L
	6302	540.7723	1079.5301	1079.5287	1.28	0	58	0.00037	1	U	R.APFDLFENK.K
	6477	571.2835	1140.5525	1140.5523	0.11	0	49	0.0028	1	U	K.LGIHEDSTNR.R
	6515	576.2826	1150.5507	1150.5506	0.14	0	41	0.019	1		K.YIDQEELNK.T
	6614	597.8279	1193.6413	1193.6404	0.77	0	52	0.0014	1	U	K.IDIIPNPQER.T
	6718	621.8563	1241.6980	1241.6979	0.04	0	78	4.8e-006	1		K.ADLINNLGTIAK.S
	6794	638.3254	1274.6363	1274.6354	0.75	0	81	2.6e-006	1	U	R.ELISNASDALDK.I
	6856	656.2875	1310.5605	1310.5626	-1.59	0	71	6.4e-006	1		K.EDQTEYLEER.R
	6912	674.8369	1347.6593	1347.6572	1.57	0	59	0.00061	1		K.HFSVEGQLEFR.A
	6934	683.3686	1364.7226	1364.7221	0.36	0	69	3e-005	1	U	R.TLTLVDTGIGMTK.A
	6997	708.8234	1415.6322	1415.6303	1.29	0	36	0.028	1		K.EGLELPEDEEEK.K
	7191	509.9199	1526.7379	1526.7365	0.93	0	38	0.041	1		K.SLTNDWEDHLAVK.H
	7316	924.4034	1846.7922	1846.7897	1.35	0	87	1.5e-007	1	U	R.NPDDITQEEYGEFYK.S
	7465	731.6511	2191.9315	2191.9328	-0.57	0	83	4.9e-007	1	U	R.YHTSQSGDEMTSLSEYVSR.M
	7510	752.6581	2254.9526	2254.9516	0.46	0	79	9.3e-007	1		K.HNDDEQYAWESSAGGSFTVR.A
	Proteins matching the same set of peptides:
	CAB66478.1 Mass: 84790 Score: 700 Matches: 17(17) Sequences: 17(17)
	hypothetical protein [Homo sapiens]
	NP_001258898.1 Mass: 83212 Score: 700 Matches: 17(17) Sequences: 17(17)
	heat shock protein HSP 90-beta isoform a [Homo sapiens]
	NP_001258901.1 Mass: 82269 Score: 700 Matches: 17(17) Sequences: 17(17)
	heat shock protein HSP 90-beta isoform c [Homo sapiens]
3.	EAX00324.1 Mass: 108834 Score: 618 Matches: 15(15) Sequences: 14(14) emPAI: 0.48
	echinoderm microtubule associated protein like 4 [Homo sapiens]
	Query	Observed	Mr(expt)	Mr(calc)	ppm	Miss	Score	Expect	Rank	Unique	Peptide
	5083	414.7515	827.4884	827.4865	2.28	0	41	0.012	1	U	K.AALADVLR.R
	5673	465.2508	928.4870	928.4866	0.49	0	52	0.0014	1	U	K.TTVEPTPGK.G
	6267	536.8035	1071.5925	1071.5924	0.08	0	46	0.0087	1	U	R.IATGQIAGVDK.D
	6469	569.2843	1136.5540	1136.5536	0.39	0	60	0.00024	1	U	K.VIAVADDFCK.V
	6639	602.8035	1203.5925	1203.5918	0.62	0	44	0.011	1	U	K.DLLLTCAQDR.Q
	6693	410.5294	1228.5664	1228.5659	0.43	0	41	0.0098	1	U	R.HYLGHTDCVK.C
	6786	634.8444	1267.6743	1267.6772	-2.30	0	59	0.00058	1	U	R.LAISEDHVASVK.K
	6803	428.2419	1281.7039	1281.7041	-0.14	0	71	1.4e-005	1	U	R.KPSHTSAVSIAGK.E
	7005	710.3600	1418.7054	1418.7041	0.90	0	49	0.0041	1	U	R.EIEVPDQYGTIR.A
	7010	710.8697	1419.7248	1419.7245	0.21	0	70	3.3e-005	1	U	K.DVIINQEGEYIK.M
	7032	715.3811	1428.7476	1428.7460	1.14	0	71	2.4e-005	1	U	R.VQQQEDEITVLK.A
	7038	478.5274	1432.5603	1432.5603	-0.04	0	(49)	0.0003	1	U	K.SHNSWENSDDSR.N
	7039	717.2883	1432.5620	1432.5603	1.16	0	52	0.00017	1	U	K.SHNSWENSDDSR.N
	7280	865.9635	1729.9124	1729.9098	1.54	0	83	1.8e-006	1	U	K.LSLPQNETVADTTLTK.A
	7823	1127.2117	3378.6132	3378.6063	2.04	0	96	1e-007	1	U	K.APVSSTESVIQSNTPTPPPSQPLNETAEEESR.I
	Proteins matching the same set of peptides:
	AAG09279.2 Mass: 108835 Score: 618 Matches: 15(15) Sequences: 14(14)
	cytoplasmic protein [Homo sapiens]
	AAI46800.1 Mass: 102395 Score: 618 Matches: 15(15) Sequences: 14(14)
	EML4 protein [Homo sapiens]
	NP_061936.3 Mass: 108848 Score: 618 Matches: 15(15) Sequences: 14(14)
	echinoderm microtubule-associated protein-like 4 isoform a [Homo sapiens]
	NP_001138548.2 Mass: 102380 Score: 618 Matches: 15(15) Sequences: 14(14)
	echinoderm microtubule-associated protein-like 4 isoform b [Homo sapiens]
	KAI2523163.1 Mass: 102367 Score: 618 Matches: 15(15) Sequences: 14(14)
	EMAP like 4 [Homo sapiens]
	KAI4034308.1 Mass: 108863 Score: 618 Matches: 15(15) Sequences: 14(14)
	EMAP like 4 [Homo sapiens]
4.	NP_000810.1 Mass: 107699 Score: 610 Matches: 15(15) Sequences: 14(14) emPAI: 0.49
	trifunctional purine biosynthetic protein adenosine-3 isoform 1 [Homo sapiens]
	Query	Observed	Mr(expt)	Mr(calc)	ppm	Miss	Score	Expect	Rank	Unique	Peptide
	4223	337.6958	673.3770	673.3759	1.75	0	34	0.0099	1	U	K.ASGLAAGK.G
	4677	372.7158	743.4171	743.4177	-0.80	0	39	0.0078	1	U	K.AAVAGLDK.A
	5839	324.8658	971.5757	971.5764	-0.70	1	(38)	0.034	1	U	K.IKDTVLQR.T
	5840	486.7953	971.5761	971.5764	-0.29	1	43	0.011	1	U	K.IKDTVLQR.T
	6024	508.7723	1015.5301	1015.5298	0.26	0	56	0.00083	1	U	K.EQTEQILR.D
	6127	519.2800	1036.5455	1036.5454	0.09	0	44	0.011	1	U	R.HGIPTAQWK.A
	6671	608.8251	1215.6356	1215.6346	0.79	0	51	0.0025	1	U	R.ENLISALEEAK.K
	6863	658.3544	1314.6942	1314.6932	0.76	0	55	0.00099	1	U	K.EEAWVIGSVVAR.A
	6888	665.8466	1329.6787	1329.6776	0.80	0	67	6.5e-005	1	U	K.DPLLASGTDGVGTK.L
	6914	676.3666	1350.7186	1350.7184	0.18	0	74	9.5e-006	1	U	K.VDLGGFAGLFDLK.A
	7077	725.8928	1449.7710	1449.7650	4.11	0	68	4.7e-005	1	U	R.TFNCGVGAVLVVSK.E
	7258	555.9746	1664.9018	1664.8998	1.20	0	57	0.00053	1	U	K.AFAHITGGGLLENIPR.V
	7303	602.3197	1803.9373	1803.9367	0.32	1	70	3.8e-005	1	U	K.AAGFKDPLLASGTDGVGTK.L
	7401	1019.4819	2036.9493	2036.9473	0.98	0	108	3.8e-009	1	U	R.SAGVQCFGPTAEAAQLESSK.R
	7422	693.0182	2076.0327	2076.0310	0.85	0	107	7e-009	1	U	K.ISNTAISISDHTALAQFCK.E
	Proteins matching the same set of peptides:
	AAI07713.1 Mass: 107655 Score: 610 Matches: 15(15) Sequences: 14(14)
	Phosphoribosylglycinamide formyltransferase, phosphoribosylglycinamide synthetase, phosphoribosylaminoimidazole synthetase [Homo sapiens]
	BAD92022.1 Mass: 112067 Score: 610 Matches: 15(15) Sequences: 14(14)
	phosphoribosylglycinamide formyltransferase, phosphoribosylglycinamide synthetase, phosphoribosylaminoimidazole synthetase isoform 1 variant, partial [Homo sapiens]
	KAI2596008.1 Mass: 107713 Score: 610 Matches: 15(15) Sequences: 14(14)
	phosphoribosylglycinamide formyltransferase, phosphoribosylglycinamide synthetase, phosphoribosylaminoimidazole synthetase [Homo sapiens]
5.	AAG41947.1 Mass: 66027 Score: 585 Matches: 14(14) Sequences: 13(13) emPAI: 0.82
	keratin 1 [Homo sapiens]
	Query	Observed	Mr(expt)	Mr(calc)	ppm	Miss	Score	Expect	Rank	Unique	Peptide
	5845	487.2675	972.5205	972.5240	-3.58	0	46	0.0079	1		K.IEISELNR.V
	6121	517.2629	1032.5112	1032.5087	2.40	0	54	0.0012	1	U	R.TLLEGEESR.M
	6242	533.7628	1065.5110	1065.5090	1.80	1	37	0.047	1		K.YEDEINKR.T
	6344	546.7559	1091.4972	1091.4956	1.45	0	82	1.1e-006	1	U	R.GSGGGSSGGSIGGR.G 6345
	6436	563.2750	1124.5354	1124.5349	0.39	0	57	0.00044	1	U	K.AEAESLYQSK.Y
	6579	590.3048	1178.5951	1178.5931	1.65	0	53	0.0016	1		K.YEELQITAGR.H
	6774	633.3229	1264.6312	1264.6299	1.02	0	58	0.00049	1	U	R.TNAENEFVTIK.K
	6851	436.8896	1307.6469	1307.6469	0.01	2	44	0.01	1		R.NKYEDEINKR.T
	6890	666.7640	1331.5134	1331.5122	0.91	0	44	0.00097	1	U	K.NMQDMVEDYR.N
	6921	679.3520	1356.6894	1356.6885	0.70	0	78	4.8e-006	1	U	K.LNDLEDALQQAK.E
	7106	738.3960	1474.7774	1474.7780	-0.36	0	69	5.9e-005	1		R.FLEQQNQVLQTK.W
	7291	883.3732	1764.7318	1764.7275	2.43	0	116	1.6e-010	1	U	R.FSSCGGGGGSFGAGGGFGSR.S
	7376	665.3320	1992.9741	1992.9693	2.38	0	72	2.2e-005	1	U	R.THNLEPYFESFINNLR.R
	Proteins matching the same set of peptides:
	AAB47721.1 Mass: 65978 Score: 585 Matches: 14(14) Sequences: 13(13)
	keratin 1 [Homo sapiens]
	NP_006112.3 Mass: 65999 Score: 585 Matches: 14(14) Sequences: 13(13)
	keratin, type II cytoskeletal 1 [Homo sapiens]
	AFA52002.1 Mass: 66013 Score: 585 Matches: 14(14) Sequences: 13(13)
	keratin 1 [Homo sapiens]
	AFA52004.1 Mass: 65930 Score: 585 Matches: 14(14) Sequences: 13(13)
	keratin 1 [Homo sapiens]
	AFA52005.1 Mass: 66086 Score: 585 Matches: 14(14) Sequences: 13(13)
	keratin 1 [Homo sapiens]
	AFA52006.1 Mass: 66026 Score: 585 Matches: 14(14) Sequences: 13(13)
	keratin 1 [Homo sapiens]
	AFA52007.1 Mass: 66071 Score: 585 Matches: 14(14) Sequences: 13(13)
	keratin 1 [Homo sapiens]
6.	ABR25253.1 Mass: 117925 Score: 563 Matches: 15(15) Sequences: 15(15) emPAI: 0.48
	ubiquitin-activating enzyme 6 [Homo sapiens]
	Query	Observed	Mr(expt)	Mr(calc)	ppm	Miss	Score	Expect	Rank	Unique	Peptide
	5617	458.2791	914.5437	914.5437	-0.00	0	37	0.043	1	U	K.LVKPTTEK.K
	6036	509.7622	1017.5098	1017.5091	0.70	0	56	0.00087	1	U	K.VVQTDETAR.K
	6140	520.7693	1039.5240	1039.5186	5.25	0	37	0.041	1	U	K.SYTAADATLK.I
	6336	545.7982	1089.5818	1089.5818	-0.06	0	50	0.0037	1	U	K.IQEFKPSNK.V
	6394	553.8143	1105.6140	1105.6132	0.75	0	56	0.00051	1	U	K.NFALLGVGTSK.E
	6442	564.2905	1126.5665	1126.5659	0.56	0	52	0.0011	1	U	K.TVFFESLER.Q
	6556	583.2701	1164.5256	1164.5267	-0.97	0	50	0.0014	1	U	R.ACIGDTLCQK.L
	6660	606.3259	1210.6372	1210.6346	2.11	0	61	0.00017	1	U	K.LETGQFLTFR.E
	6696	616.3032	1230.5918	1230.5921	-0.26	0	51	0.0021	1	U	K.VTGGYPFEAYK.N
	6767	631.8013	1261.5881	1261.5873	0.61	0	39	0.024	1	U	R.NWSQCVELAR.L
	6962	463.2423	1386.7049	1386.7044	0.35	0	59	0.00038	1	U	K.FISADVHGIWSR.L
	7162	503.5831	1507.7276	1507.7267	0.59	0	47	0.0091	1	U	R.KPDHVPISSEDER.N
	7368	990.9500	1979.8855	1979.8823	1.62	0	112	8.9e-010	1	U	K.VCPTTETIYNDEFYTK.Q
	7382	670.9792	2009.9157	2009.9191	-1.68	0	37	0.047	1	U	K.DDDHNGHIDFITAASNLR.A
	7419	519.7622	2075.0195	2075.0184	0.51	0	78	5.9e-006	1	U	K.GHTEVIVPHLTESYNSHR.D
	Proteins matching the same set of peptides:
	NP_060697.4 Mass: 117895 Score: 563 Matches: 15(15) Sequences: 15(15)
	ubiquitin-like modifier-activating enzyme 6 [Homo sapiens]
7.	NP_001609.2 Mass: 113012 Score: 500 Matches: 13(13) Sequences: 12(12) emPAI: 0.38
	poly [ADP-ribose] polymerase 1 [Homo sapiens]
	Query	Observed	Mr(expt)	Mr(calc)	ppm	Miss	Score	Expect	Rank	Unique	Peptide
	5088	415.2423	828.4701	828.4705	-0.55	0	40	0.023	1	U	K.LTVNPGTK.S
	5714	468.7265	935.4384	935.4382	0.17	0	39	0.021	1	U	K.VCSTNDLK.E
	6245	533.7985	1065.5824	1065.5818	0.49	0	53	0.00089	1	U	K.AEPVEVVAPR.G
	6598	593.2934	1184.5722	1184.5713	0.77	0	45	0.0068	1	U	K.TLGDFAAEYAK.S
	6925	680.8335	1359.6524	1359.6518	0.48	1	90	2.2e-007	1	U	R.KGDEVDGVDEVAK.K
	6926	454.2250	1359.6533	1359.6518	1.10	1	(72)	1.4e-005	1	U	R.KGDEVDGVDEVAK.K
	6945	458.2404	1371.6994	1371.6994	0.04	1	49	0.004	1	U	K.LQLLEDDKENR.Y
	6948	689.3785	1376.7424	1376.7412	0.87	0	64	0.00011	1	U	R.TTNFAGILSQGLR.I
	6980	700.3623	1398.7100	1398.7103	-0.18	0	67	4.6e-005	1	U	K.QQVPSGESAILDR.V
	7137	498.9471	1493.8194	1493.8202	-0.50	0	57	0.00042	1	U	K.KPPLLNNADSVQAK.V
	7144	750.3580	1498.7014	1498.7052	-2.56	0	51	0.0015	1	U	R.HPDVEVDGFSELR.W
	7192	510.9287	1529.7641	1529.7685	-2.88	1	45	0.011	1	U	K.VVDRDSEEAEIIR.K
	7248	812.9084	1623.8022	1623.7992	1.87	0	65	0.0001	1	U	R.VVSEDFLQDVSASTK.S
	Proteins matching the same set of peptides:
	BAG35260.1 Mass: 113014 Score: 500 Matches: 13(13) Sequences: 12(12)
	unnamed protein product [Homo sapiens]
	AAH37545.1 Mass: 112984 Score: 500 Matches: 13(13) Sequences: 12(12)
	Poly (ADP-ribose) polymerase 1 [Homo sapiens]
	AAA60155.1 Mass: 113063 Score: 500 Matches: 13(13) Sequences: 12(12)
	poly(ADP-ribose) polymerase [Homo sapiens]
	BAG64403.1 Mass: 111056 Score: 500 Matches: 13(13) Sequences: 12(12)
	unnamed protein product [Homo sapiens]
8.	NP_000692.2 Mass: 112824 Score: 499 Matches: 11(11) Sequences: 11(11) emPAI: 0.35
	sodium/potassium-transporting ATPase subunit alpha-1 isoform a [Homo sapiens]
	Query	Observed	Mr(expt)	Mr(calc)	ppm	Miss	Score	Expect	Rank	Unique	Peptide
	4669	372.2239	742.4332	742.4337	-0.66	0	39	0.0091	2	U	R.AAEILAR.D
	4993	406.2005	810.3864	810.3872	-0.90	0	43	0.0045	1	U	K.YGTDLSR.G
	6324	544.3001	1086.5855	1086.5856	-0.01	0	52	0.002	1		K.LIIVEGCQR.Q
	6390	553.3035	1104.5924	1104.5927	-0.32	0	50	0.0026	1	U	K.TSATWLALSR.I
	6697	616.3298	1230.6451	1230.6456	-0.36	0	78	6.7e-006	1	U	R.AVAGDASESALLK.C
	6707	618.8569	1235.6993	1235.6986	0.57	0	40	0.015	1	U	R.LNIPVSQVNPR.D
	6766	631.3457	1260.6768	1260.6714	4.33	0	41	0.019	1	U	K.IVEIPFNSTNK.Y
	7178	760.3559	1518.6972	1518.6950	1.46	0	73	8.5e-006	1	U	R.SPDFTNENPLETR.N
	7305	906.4802	1810.9459	1810.9425	1.87	0	116	8.6e-010	1	U	R.QGAIVAVTGDGVNDSPALK.K
	7345	962.9639	1923.9132	1923.9095	1.90	0	119	4.7e-010	1	U	K.NLEAVETLGSTSTICSDK.T
	7755	945.4667	2833.3782	2833.3770	0.43	1	59	0.00065	1	U	K.EQPLDEELKDAFQNAYLELGGLGER.V
	Proteins matching the same set of peptides:
	BAH11971.1 Mass: 112836 Score: 499 Matches: 11(11) Sequences: 11(11)
	unnamed protein product [Homo sapiens]
	BAH12337.1 Mass: 112366 Score: 499 Matches: 11(11) Sequences: 11(11)
	unnamed protein product, partial [Homo sapiens]
	BAG37313.1 Mass: 112797 Score: 499 Matches: 11(11) Sequences: 11(11)
	unnamed protein product [Homo sapiens]
	NP_001153705.1 Mass: 112928 Score: 499 Matches: 11(11) Sequences: 11(11)
	sodium/potassium-transporting ATPase subunit alpha-1 isoform c [Homo sapiens]
	NP_001153706.1 Mass: 109480 Score: 499 Matches: 11(11) Sequences: 11(11)
	sodium/potassium-transporting ATPase subunit alpha-1 isoform d [Homo sapiens]
9.	NP_003325.2 Mass: 117774 Score: 496 Matches: 12(12) Sequences: 12(12) emPAI: 0.37
	ubiquitin-like modifier-activating enzyme 1 [Homo sapiens]
	Query	Observed	Mr(expt)	Mr(calc)	ppm	Miss	Score	Expect	Rank	Unique	Peptide
	4696	747.3893	746.3821	746.3810	1.41	0	42	0.0071	1	U	M.SSSPLSK.K
	4796	387.1929	772.3712	772.3715	-0.37	0	37	0.013	1	U	R.VGPDTER.I
	4799	387.2294	772.4443	772.4443	0.00	0	42	0.022	1	U	K.LVVADTR.G
	4871	393.7084	785.4023	785.4032	-1.05	0	33	0.04	1	U	R.AEVSQPR.L
	5278	431.2250	860.4355	860.4352	0.40	0	45	0.0097	1	U	K.SDTAAAAVR.Q
	6721	622.3666	1242.7186	1242.7183	0.22	0	77	5.4e-006	1	U	R.KPLLESGTLGTK.G
	6742	625.7845	1249.5545	1249.5575	-2.33	0	48	0.0023	1	U	R.AENYDIPSADR.H
	6761	630.3696	1258.7247	1258.7245	0.16	0	73	1e-005	1	U	R.LQTSSVLVSGLR.G
	7066	723.3391	1444.6635	1444.6617	1.31	0	85	6.3e-007	1	U	K.DNPGVVTCLDEAR.H
	7186	763.3416	1524.6687	1524.6692	-0.35	0	106	8.9e-009	1	U	K.NGSEADIDEGLYSR.Q
	7266	566.2903	1695.8492	1695.8481	0.64	0	70	3.3e-005	1	U	K.NFPNAIEHTLQWAR.D
	7416	690.9947	2069.9622	2069.9614	0.42	0	93	1.5e-007	1	U	K.IHVSDQELQSANASVDDSR.L
10.	AAB42010.1 Mass: 98820 Score: 488 Matches: 12(12) Sequences: 12(12) emPAI: 0.45
	Prt1 homolog [Homo sapiens]
	Query	Observed	Mr(expt)	Mr(calc)	ppm	Miss	Score	Expect	Rank	Unique	Peptide
	5733	472.7391	943.4636	943.4611	2.68	0	38	0.025	1	U	K.DPVSIEER.A
	6367	549.7772	1097.5399	1097.5393	0.50	0	47	0.0042	1	U	R.VNLFTDFDK.Y
	6402	554.7770	1107.5395	1107.5383	1.12	0	43	0.011	1	U	R.NLFNVVDCK.L
	6751	628.2747	1254.5348	1254.5339	0.70	0	44	0.0032	1	U	R.YWLEEAECR.D
	6924	680.8086	1359.6026	1359.6015	0.85	0	85	4.3e-007	1	U	R.AQAVSEDAGGNEGR.A
	6995	708.3261	1414.6377	1414.6365	0.84	0	58	0.00023	1	U	R.DQYSVIFESGDR.T
	7022	714.3191	1426.6236	1426.6252	-1.12	0	65	3.8e-005	1	U	K.ITNDFYPEEDGK.T
	7306	908.9064	1815.7983	1815.7945	2.12	0	42	0.0067	1	U	-.MQDAENVAVPEAAEER.A
	7341	640.6400	1918.8982	1918.8996	-0.73	0	69	3e-005	1	U	R.FSHQGVQLIDFSPCER.Y
	7356	651.0039	1949.9899	1949.9887	0.62	0	52	0.0025	1	U	K.GYIFLEYASPAHAVDAVK.N
	7397	679.0093	2034.0062	2034.0058	0.19	1	74	1.6e-005	1	U	R.TSIFWNDVKDPVSIEER.A
	7714	897.4518	2689.3335	2689.3308	1.02	0	68	8.6e-005	1	U	K.DRPQEADGIDSVIVVDNVPQVGPDR.L
	Proteins matching the same set of peptides:
	BAG62591.1 Mass: 85081 Score: 488 Matches: 12(12) Sequences: 12(12)
	unnamed protein product [Homo sapiens]
	EAW87239.1 Mass: 93031 Score: 488 Matches: 12(12) Sequences: 12(12)
	eukaryotic translation initiation factor 3, subunit 9 eta, 116kDa, isoform CRA_c, partial [Homo sapiens]
	AAC99479.1 Mass: 92434 Score: 488 Matches: 12(12) Sequences: 12(12)
	eukaryotic translation initiation factor [Homo sapiens]
	NP_001032360.1 Mass: 92424 Score: 488 Matches: 12(12) Sequences: 12(12)
	eukaryotic translation initiation factor 3 subunit B isoform 1 [Homo sapiens]
	XP_047276956.1 Mass: 88625 Score: 488 Matches: 12(12) Sequences: 12(12)
	eukaryotic translation initiation factor 3 subunit B isoform X2 [Homo sapiens]
11.	AAH02360.1 Mass: 109408 Score: 457 Matches: 12(12) Sequences: 12(12) emPAI: 0.40
	Elongation factor Tu GTP binding domain containing 2 [Homo sapiens]
	Query	Observed	Mr(expt)	Mr(calc)	ppm	Miss	Score	Expect	Rank	Unique	Peptide
	4346	344.2235	686.4324	686.4327	-0.37	0	38	0.0024	1	U	K.ALLGSVK.D
	5592	455.2555	908.4965	908.4967	-0.27	0	35	0.047	1	U	K.FNTTSVIK.I
	6123	517.7720	1033.5295	1033.5291	0.35	0	45	0.0088	1	U	K.GLSEDVSISK.F
	6631	601.2983	1200.5820	1200.5809	0.96	0	59	0.00025	1	U	R.EGPLCDELIR.N
	6755	628.8596	1255.7047	1255.7024	1.83	0	74	8.5e-006	1	U	K.STPVTVVLPDTK.G
	6969	696.8907	1391.7668	1391.7660	0.59	0	49	0.0021	1	U	K.IAVEPVNPSELPK.M
	7093	487.6123	1459.8151	1459.8147	0.26	0	46	0.005	1	U	K.ILDAVVAQEPLHR.G
	7300	899.9562	1797.8979	1797.8938	2.32	0	52	0.0021	1	U	K.AFIPAIDSFGFETDLR.T
	7328	632.0081	1893.0025	1892.9996	1.54	0	51	0.0028	1	U	R.GHVTQDAPIPGSPLYTIK.A
	7386	673.3208	2016.9406	2016.9397	0.41	0	44	0.0098	1	U	K.TCFVDCLIEQTHPEIR.K
	7425	1041.0289	2080.0433	2080.0399	1.66	0	81	3e-006	1	U	K.VADPVVTFCETVVETSSLK.C
	7630	1214.0548	2426.0951	2426.0907	1.78	0	78	3.6e-006	1	U	K.VLGENYTLEDEEDSQICTVGR.L
	Proteins matching the same set of peptides:
	CAG33055.1 Mass: 109390 Score: 457 Matches: 12(12) Sequences: 12(12)
	U5-116KD [Homo sapiens]
	BAG54331.1 Mass: 108142 Score: 457 Matches: 12(12) Sequences: 12(12)
	unnamed protein product [Homo sapiens]
	BAG64023.1 Mass: 103756 Score: 457 Matches: 12(12) Sequences: 12(12)
	unnamed protein product [Homo sapiens]
	NP_001136077.1 Mass: 105317 Score: 457 Matches: 12(12) Sequences: 12(12)
	116 kDa U5 small nuclear ribonucleoprotein component isoform b [Homo sapiens]
	NP_001245282.1 Mass: 109366 Score: 457 Matches: 12(12) Sequences: 12(12)
	116 kDa U5 small nuclear ribonucleoprotein component isoform a [Homo sapiens]
12.	NP_004913.2 Mass: 118249 Score: 439 Matches: 11(11) Sequences: 11(11) emPAI: 0.33
	protein transport protein Sec24C [Homo sapiens]
	Query	Observed	Mr(expt)	Mr(calc)	ppm	Miss	Score	Expect	Rank	Unique	Peptide
	5657	464.2504	926.4863	926.4862	0.14	0	37	0.035	1	U	R.VGFVTYNK.V
	5799	480.7795	959.5444	959.5440	0.42	0	39	0.031	1	U	K.SLLDFLPR.E
	6035	509.7438	1017.4731	1017.4727	0.45	0	65	5.8e-005	1	U	R.EGGAEESAIR.V
	6225	531.7827	1061.5509	1061.5506	0.27	0	48	0.0056	1	U	R.GTEPFVTGVR.G
	6941	685.3517	1368.6888	1368.6885	0.22	0	73	1.5e-005	1	U	K.SPVESTTEPPAVR.A
	7120	743.3342	1484.6538	1484.6532	0.42	0	85	3.9e-007	1	U	K.YASFQVENDQER.F
	7169	756.9440	1511.8734	1511.8712	1.46	0	53	0.00065	1	U	R.GQVPPLVTTNFLVK.D
	7241	525.6633	1573.9680	1573.9668	0.77	0	61	1.2e-005	1	U	K.QAQVPLAAVIKPLAR.L
	7310	913.4512	1824.8878	1824.8862	0.85	0	44	0.011	1	U	R.DTLITQCAQILACYR.K
	7418	692.3447	2074.0124	2074.0088	1.72	0	89	4.5e-007	1	U	R.IHNLALNCCTQLADLYR.N
	7635	811.7555	2432.2448	2432.2408	1.67	2	46	0.011	1	U	K.RLDPDAIPSPIQVIEDDRNNR.G
	Proteins matching the same set of peptides:
	BAA07558.2 Mass: 121894 Score: 439 Matches: 11(11) Sequences: 11(11)
	KIAA0079, partial [Homo sapiens]
	AAH18928.1 Mass: 118239 Score: 439 Matches: 11(11) Sequences: 11(11)
	SEC24 family, member C (S. cerevisiae) [Homo sapiens]
	EAW54516.1 Mass: 111914 Score: 439 Matches: 11(11) Sequences: 11(11)
	SEC24 related gene family, member C (S. cerevisiae), isoform CRA_b [Homo sapiens]
13.	NP_000412.4 Mass: 58792 Score: 381 Matches: 9(9) Sequences: 9(9) emPAI: 0.59
	keratin, type I cytoskeletal 10 isoform 1 [Homo sapiens]
	Query	Observed	Mr(expt)	Mr(calc)	ppm	Miss	Score	Expect	Rank	Unique	Peptide
	4975	404.2026	806.3906	806.3923	-2.05	0	46	0.003	1	U	R.LAADDFR.L
	4983	405.2232	808.4319	808.4330	-1.38	0	44	0.0025	1		R.LASYLDK.V
	6393	553.7667	1105.5189	1105.5186	0.26	0	50	0.002	1	U	K.VTMQNLNDR.L
	6558	583.2953	1164.5760	1164.5775	-1.24	0	63	0.00012	1	U	R.LENEIQTYR.S
	6632	601.3127	1200.6108	1200.6098	0.80	0	77	5.3e-006	1	U	R.QSVEADINGLR.R
	6702	412.2310	1233.6711	1233.6717	-0.52	1	53	0.0011	1	U	R.LKYENEVALR.Q
	6768	631.8015	1261.5885	1261.5899	-1.10	0	65	7e-005	1	U	R.SLLEGEGSSGGGGR.G
	6965	695.8455	1389.6764	1389.6736	2.03	0	82	1.7e-006	1	U	K.QSLEASLAETEGR.Y
	7221	775.3426	1548.6706	1548.6700	0.42	0	90	1.4e-007	1	U	R.SGGGGGGGGCGGGGGVSSLR.I
	Proteins matching the same set of peptides:
	CAA32649.1 Mass: 59492 Score: 381 Matches: 9(9) Sequences: 9(9)
	unnamed protein product [Homo sapiens]
	AAH34697.1 Mass: 58792 Score: 381 Matches: 9(9) Sequences: 9(9)
	Keratin 10 [Homo sapiens]
	EAW60681.1 Mass: 63308 Score: 381 Matches: 9(9) Sequences: 9(9)
	keratin 10 (epidermolytic hyperkeratosis; keratosis palmaris et plantaris), isoform CRA_b [Homo sapiens]
	NP_001366295.1 Mass: 63308 Score: 381 Matches: 9(9) Sequences: 9(9)
	keratin, type I cytoskeletal 10 isoform 2 [Homo sapiens]
	KAI2582860.1 Mass: 59588 Score: 381 Matches: 9(9) Sequences: 9(9)
	keratin 10 [Homo sapiens]
	KAI4049370.1 Mass: 58458 Score: 381 Matches: 9(9) Sequences: 9(9)
	keratin 10 [Homo sapiens]
14.	NP_005339.3 Mass: 84607 Score: 378 Matches: 9(9) Sequences: 9(9) emPAI: 0.38
	heat shock protein HSP 90-alpha isoform 2 [Homo sapiens]
	Query	Observed	Mr(expt)	Mr(calc)	ppm	Miss	Score	Expect	Rank	Unique	Peptide
	6136	520.2503	1038.4861	1038.4869	-0.84	0	56	0.0004	1		R.YESLTDPSK.L
	6515	576.2826	1150.5507	1150.5506	0.14	0	41	0.019	1		K.YIDQEELNK.T
	6718	621.8563	1241.6980	1241.6979	0.04	0	78	4.8e-006	1		K.ADLINNLGTIAK.S
	6856	656.2875	1310.5605	1310.5626	-1.59	0	71	6.4e-006	1		K.EDQTEYLEER.R
	6912	674.8369	1347.6593	1347.6572	1.57	0	59	0.00061	1		K.HFSVEGQLEFR.A
	6934	683.3686	1364.7226	1364.7221	0.36	0	69	3e-005	1	U	R.TLTIVDTGIGMTK.A
	6997	708.8234	1415.6322	1415.6303	1.29	0	36	0.028	1		K.EGLELPEDEEEK.K
	7191	509.9199	1526.7379	1526.7365	0.93	0	38	0.041	1		K.SLTNDWEDHLAVK.H
	7510	752.6581	2254.9526	2254.9516	0.46	0	79	9.3e-007	1		K.HNDDEQYAWESSAGGSFTVR.T
	Proteins matching the same set of peptides:
	AAI08696.1 Mass: 68329 Score: 378 Matches: 9(9) Sequences: 9(9)
	HSP90AA1 protein, partial [Homo sapiens]
	ABC40730.1 Mass: 98082 Score: 378 Matches: 9(9) Sequences: 9(9)
	heat shock 90kDa protein 1, alpha [Homo sapiens]
	BAG51711.1 Mass: 98052 Score: 378 Matches: 9(9) Sequences: 9(9)
	unnamed protein product [Homo sapiens]
	NP_001017963.2 Mass: 98099 Score: 378 Matches: 9(9) Sequences: 9(9)
	heat shock protein HSP 90-alpha isoform 1 [Homo sapiens]
	XP_011535020.1 Mass: 98012 Score: 378 Matches: 9(9) Sequences: 9(9)
	heat shock protein HSP 90-alpha isoform X1 [Homo sapiens]
15.	BAG54384.1 Mass: 83033 Score: 363 Matches: 12(12) Sequences: 11(11) emPAI: 0.50
	unnamed protein product [Homo sapiens]
	Query	Observed	Mr(expt)	Mr(calc)	ppm	Miss	Score	Expect	Rank	Unique	Peptide
	4509	711.3677	710.3605	710.3599	0.80	0	32	0.0047	1	U	R.ASYGVSK.G
	5537	450.7701	899.5257	899.5263	-0.59	1	51	0.0018	1	U	R.KAVVVCPK.D
	5931	332.8409	995.5010	995.5036	-2.62	0	(40)	0.017	1	U	K.DIDIHEVR.I
	5932	498.7581	995.5016	995.5036	-1.98	0	41	0.015	1	U	K.DIDIHEVR.I
	6053	511.2869	1020.5592	1020.5604	-1.17	0	37	0.036	1	U	K.DLPEHAVLK.M
	6178	524.7749	1047.5352	1047.5349	0.32	0	46	0.0073	1	U	K.NGQDLGVAFK.I
	6275	537.8058	1073.5971	1073.5968	0.32	1	53	0.0016	1	U	K.VSELKEELK.K
	6776	422.8907	1265.6502	1265.6503	-0.10	1	44	0.011	1	U	K.LLEQYKEESK.K
	6978	699.8514	1397.6883	1397.6861	1.63	0	41	0.024	1	U	K.YNILGTNTIMDK.M
	7156	753.2805	1504.5465	1504.5446	1.24	0	52	3e-005	1	U	K.TCNCETEDYGEK.F
	7259	556.2808	1665.8206	1665.8183	1.40	1	48	0.0046	1	U	K.KAEGGGGGGRPGAPAAGDGK.T
	7272	857.9609	1713.9073	1713.9050	1.36	0	105	1.1e-008	1	U	K.SSGPTSLFAVTVAPPGAR.Q
	Proteins matching the same set of peptides:
	NP_114032.2 Mass: 90528 Score: 363 Matches: 12(12) Sequences: 11(11)
	heterogeneous nuclear ribonucleoprotein U isoform a [Homo sapiens]
16.	NP_002262.4 Mass: 123550 Score: 346 Matches: 10(10) Sequences: 9(9) emPAI: 0.25
	importin-5 [Homo sapiens]
	Query	Observed	Mr(expt)	Mr(calc)	ppm	Miss	Score	Expect	Rank	Unique	Peptide
	5804	481.7317	961.4488	961.4465	2.40	0	41	0.015	1		R.NTTAAEEAR.Q 5803
	6128	519.2907	1036.5669	1036.5665	0.33	0	55	0.00052	1		K.HIVENAVQK.E
	6276	537.8377	1073.6609	1073.6597	1.09	0	43	0.0034	1		K.ITFLLQAIR.N
	6567	586.3325	1170.6505	1170.6496	0.76	0	57	0.00061	1		K.SLVEIADTVPK.Y
	7015	712.8171	1423.6196	1423.6184	0.85	0	35	0.03	1	U	K.LCGDTSLNNMQR.Q
	7311	612.3036	1833.8891	1833.8891	0.04	1	66	8.9e-005	1		K.TKENVNATENCISAVGK.I
	7314	921.4374	1840.8602	1840.8591	0.59	0	80	2.6e-006	1		R.NLIDEDGNNQWPEGLK.F
	7359	652.6597	1954.9572	1954.9571	0.05	0	41	0.023	1		R.VQAHAAAALINFTEDCPK.S
	7733	915.1532	2742.4378	2742.4340	1.36	0	73	1.6e-005	1		M.AAAAAEQQQFYLLLGNLLSPDNVVR.K
	Proteins matching the same set of peptides:
	EAX08979.1 Mass: 123593 Score: 346 Matches: 10(10) Sequences: 9(9)
	RAN binding protein 5, isoform CRA_c [Homo sapiens]
17.	AAC51317.1 Mass: 123512 Score: 346 Matches: 10(10) Sequences: 9(9) emPAI: 0.25
	karyopherin beta 3 [Homo sapiens]
	Query	Observed	Mr(expt)	Mr(calc)	ppm	Miss	Score	Expect	Rank	Unique	Peptide
	5804	481.7317	961.4488	961.4465	2.40	0	41	0.015	1		R.NTTAAEEAR.Q 5803
	6128	519.2907	1036.5669	1036.5665	0.33	0	55	0.00052	1		K.HIVENAVQK.E
	6276	537.8377	1073.6609	1073.6597	1.09	0	43	0.0034	1		K.ITFLLQAIR.N
	6567	586.3325	1170.6505	1170.6496	0.76	0	57	0.00061	1		K.SLVEIADTVPK.Y
	7015	712.8171	1423.6196	1423.6184	0.85	0	35	0.03	1	U	K.LCGDTSINNMQR.Q
	7311	612.3036	1833.8891	1833.8891	0.04	1	66	8.9e-005	1		K.TKENVNATENCISAVGK.I
	7314	921.4374	1840.8602	1840.8591	0.59	0	80	2.6e-006	1		R.NLIDEDGNNQWPEGLK.F
	7359	652.6597	1954.9572	1954.9571	0.05	0	41	0.023	1		R.VQAHAAAALINFTEDCPK.S
	7733	915.1532	2742.4378	2742.4340	1.36	0	73	1.6e-005	1		M.AAAAAEQQQFYLLLGNLLSPDNVVR.K
18.	NP_004512.1 Mass: 109617 Score: 259 Matches: 6(6) Sequences: 6(6) emPAI: 0.18
	kinesin-1 heavy chain [Homo sapiens]
	Query	Observed	Mr(expt)	Mr(calc)	ppm	Miss	Score	Expect	Rank	Unique	Peptide
	6538	580.7923	1159.5700	1159.5721	-1.74	0	95	9.1e-008	1	U	K.TGAEGAVLDEAK.N
	6699	616.8054	1231.5962	1231.5979	-1.42	0	46	0.0058	1	U	R.ILQDSLGGNCR.T
	6771	632.8040	1263.5935	1263.5943	-0.61	0	45	0.0063	1	U	K.QLESTQTESNK.K
	6862	658.3466	1314.6787	1314.6779	0.57	0	40	0.036	1	U	K.LITDLQDQNQK.M
	6876	441.8970	1322.6692	1322.6691	0.06	0	47	0.0051	1	U	K.QAVEQQIQSHR.E
	7224	776.3427	1550.6709	1550.6696	0.81	0	77	2.4e-006	1	U	K.SAEIDSDDTGGSAAQK.Q
	Proteins matching the same set of peptides:
	BAH57337.1 Mass: 167800 Score: 259 Matches: 6(6) Sequences: 6(6)
	fusion protein KIF5B-ALK [Homo sapiens]
	BAF82102.1 Mass: 100775 Score: 259 Matches: 6(6) Sequences: 6(6)
	unnamed protein product, partial [Homo sapiens]
	BAM95208.1 Mass: 137870 Score: 259 Matches: 6(6) Sequences: 6(6)
	KIF5B-RET(NM_020630)_K23;R12 fusion protein [Homo sapiens]
	BAM95209.1 Mass: 142339 Score: 259 Matches: 6(6) Sequences: 6(6)
	KIF5B-RET(NM_020975)_K23;R12 fusion protein [Homo sapiens]
	BAM95210.1 Mass: 155718 Score: 259 Matches: 6(6) Sequences: 6(6)
	KIF5B-RET(NM_020630)_K24;R11 fusion protein [Homo sapiens]
	XP_047281159.1 Mass: 99088 Score: 259 Matches: 6(6) Sequences: 6(6)
	kinesin-1 heavy chain isoform X2 [Homo sapiens]
19.	NP_001952.1 Mass: 95277 Score: 250 Matches: 7(7) Sequences: 7(7) emPAI: 0.25
	elongation factor 2 [Homo sapiens]
	Query	Observed	Mr(expt)	Mr(calc)	ppm	Miss	Score	Expect	Rank	Unique	Peptide
	4725	377.7081	753.4016	753.4021	-0.58	0	23	0.036	1	U	K.NPADLPK.L
	4738	379.7294	757.4443	757.4446	-0.40	0	59	0.00028	1	U	K.AGIIASAR.A
	5478	445.7585	889.5025	889.5022	0.34	0	37	0.032	1	U	K.FSVSPVVR.V
	6341	546.2958	1090.5771	1090.5771	0.01	0	71	2.2e-005	1	U	M.VNFTVDQIR.A
	6399	554.3246	1106.6346	1106.6336	0.93	0	61	0.00011	1	U	R.VFSGLVSTGLK.V
	7136	747.9055	1493.7964	1493.7952	0.76	0	51	0.0023	1	U	R.TFCQLILDPIFK.V
	7445	715.0309	2142.0708	2142.0705	0.13	1	70	4.1e-005	1	U	K.ARPFPDGLAEDIDKGEVSAR.Q
20.	NP_006382.1 Mass: 119440 Score: 237 Matches: 5(5) Sequences: 5(5) emPAI: 0.14
	importin-7 [Homo sapiens]
	Query	Observed	Mr(expt)	Mr(calc)	ppm	Miss	Score	Expect	Rank	Unique	Peptide
	5579	454.7271	907.4397	907.4399	-0.23	0	38	0.027	1	U	R.YGSPGNVSK.E
	6337	545.8041	1089.5936	1089.5931	0.49	0	39	0.041	1	U	K.AIFQTIQNR.N
	6790	636.8876	1271.7606	1271.7602	0.33	0	50	0.00092	1	U	K.AFAVGVQQVLLK.V
	7127	744.8882	1487.7618	1487.7580	2.58	0	76	8.1e-006	1	U	K.SDQNLQTALELTR.R
	7176	759.8687	1517.7229	1517.7209	1.29	0	103	1.2e-008	1	U	R.ETENDDLTNVIQK.M
	Proteins matching the same set of peptides:
	CAC17609.1 Mass: 116304 Score: 237 Matches: 5(5) Sequences: 5(5)
	importin7, partial [Homo sapiens]
	EAW68592.1 Mass: 120893 Score: 237 Matches: 5(5) Sequences: 5(5)
	importin 7, isoform CRA_b [Homo sapiens]
21.	AAB21124.1 Mass: 96764 Score: 229 Matches: 6(6) Sequences: 6(6) emPAI: 0.21
	p50-NF-kappa B homolog [Homo sapiens]
	Query	Observed	Mr(expt)	Mr(calc)	ppm	Miss	Score	Expect	Rank	Unique	Peptide
	5770	477.7711	953.5277	953.5294	-1.80	0	62	9.9e-005	1	U	R.AGAGAPELLR.A
	5894	493.7788	985.5431	985.5444	-1.28	0	38	0.05	1	U	K.LNSSIVEPK.E
	6098	513.7827	1025.5509	1025.5506	0.31	0	69	2.3e-005	1	U	R.VGADPALLDR.H
	6491	573.8093	1145.6040	1145.6040	-0.05	0	53	0.0016	1	U	R.QTTSPSGSLLR.S
	6943	457.9035	1370.6888	1370.6902	-1.06	0	37	0.049	1	U	R.SRPQGLTEAEQR.E
	6983	701.8083	1401.6020	1401.6008	0.89	0	80	7.4e-007	1	U	R.DSGEEAAEPSAPSR.T
	Proteins matching the same set of peptides:
	AAB23437.1 Mass: 96633 Score: 229 Matches: 6(6) Sequences: 6(6)
	p98=Rel/NF-kappa B p105 homolog [human, T lymphocytes, Peptide, 900 aa] [Homo sapiens]
	CAA43715.1 Mass: 100559 Score: 229 Matches: 6(6) Sequences: 6(6)
	NF-kB subunit [Homo sapiens]
	AOY65069.1 Mass: 91866 Score: 229 Matches: 6(6) Sequences: 6(6)
	nuclear factor NF-kappa-B p100 subunit [Homo sapiens]
	NP_001070962.1 Mass: 96689 Score: 229 Matches: 6(6) Sequences: 6(6)
	nuclear factor NF-kappa-B p100 subunit isoform a [Homo sapiens]
	NP_001248332.1 Mass: 96618 Score: 229 Matches: 6(6) Sequences: 6(6)
	nuclear factor NF-kappa-B p100 subunit isoform b [Homo sapiens]
	NP_001309864.1 Mass: 92631 Score: 229 Matches: 6(6) Sequences: 6(6)
	nuclear factor NF-kappa-B p100 subunit isoform c [Homo sapiens]
22.	NP_000217.2 Mass: 62027 Score: 167 Matches: 3(3) Sequences: 3(3) emPAI: 0.16
	keratin, type I cytoskeletal 9 [Homo sapiens]
	Query	Observed	Mr(expt)	Mr(calc)	ppm	Miss	Score	Expect	Rank	Unique	Peptide
	4983	405.2232	808.4319	808.4330	-1.38	0	44	0.0025	1		R.LASYLDK.V
	6698	616.8030	1231.5915	1231.5906	0.79	0	102	1.4e-008	1	U	R.SGGGGGGGLGSGGSIR.S
	6703	618.2679	1234.5212	1234.5215	-0.20	0	69	9.5e-006	1	U	R.FSSSSGYGGGSSR.V
	Proteins matching the same set of peptides:
	EAW60744.1 Mass: 57526 Score: 167 Matches: 3(3) Sequences: 3(3)
	keratin 9 (epidermolytic palmoplantar keratoderma) [Homo sapiens]
	CAA82315.1 Mass: 62092 Score: 167 Matches: 3(3) Sequences: 3(3)
	cytokeratin 9 [Homo sapiens]
23.	NP_003676.2 Mass: 73070 Score: 165 Matches: 3(3) Sequences: 3(3) emPAI: 0.13
	far upstream element-binding protein 2 isoform 1 [Homo sapiens]
	Query	Observed	Mr(expt)	Mr(calc)	ppm	Miss	Score	Expect	Rank	Unique	Peptide
	5397	436.7331	871.4516	871.4512	0.45	0	44	0.0083	1	U	K.IQNDAGVR.I
	6917	677.8528	1353.6910	1353.6888	1.60	0	79	6.9e-006	1	U	K.VQISPDSGGLPER.S
	7197	767.4055	1532.7965	1532.7947	1.17	0	80	4.2e-006	1	U	K.AINQQTGAFVEISR.Q
	Proteins matching the same set of peptides:
	AAC50892.1 Mass: 68393 Score: 165 Matches: 3(3) Sequences: 3(3)
	FUSE binding protein 2, partial [Homo sapiens]
	AAB53222.1 Mass: 73116 Score: 165 Matches: 3(3) Sequences: 3(3)
	KSRP [Homo sapiens]
	AAH85004.1 Mass: 72851 Score: 165 Matches: 3(3) Sequences: 3(3)
	KHSRP protein [Homo sapiens]
	NP_001353228.1 Mass: 76604 Score: 165 Matches: 3(3) Sequences: 3(3)
	far upstream element-binding protein 2 isoform 2 [Homo sapiens]
	NP_001353229.1 Mass: 70180 Score: 165 Matches: 3(3) Sequences: 3(3)
	far upstream element-binding protein 2 isoform 3 [Homo sapiens]
	KAI2588218.1 Mass: 72982 Score: 165 Matches: 3(3) Sequences: 3(3)
	LOW QUALITY PROTEIN: KH-type splicing regulatory protein [Homo sapiens]
24.	AAH28604.3 Mass: 117729 Score: 164 Matches: 3(3) Sequences: 3(3) emPAI: 0.08
	Superkiller viralicidic activity 2-like 2 (S. cerevisiae) [Homo sapiens]
	Query	Observed	Mr(expt)	Mr(calc)	ppm	Miss	Score	Expect	Rank	Unique	Peptide
	6327	544.7831	1087.5517	1087.5509	0.74	0	54	0.0012	1	U	K.AIGNTELENK.F
	6365	549.3198	1096.6251	1096.6240	0.96	0	49	0.0013	1	U	K.LTEQLAGPLR.Q
	7597	1189.5394	2377.0643	2377.0598	1.90	0	102	1.1e-008	1	U	M.ADAFGDELFSVFEGDSTTAAGTK.K
	Proteins matching the same set of peptides:
	NP_056175.3 Mass: 117729 Score: 164 Matches: 3(3) Sequences: 3(3)
	exosome RNA helicase MTR4 [Homo sapiens]
	BAF84338.1 Mass: 117823 Score: 164 Matches: 3(3) Sequences: 3(3)
	unnamed protein product [Homo sapiens]
25.	NP_002385.3 Mass: 67952 Score: 140 Matches: 3(3) Sequences: 3(3) emPAI: 0.14
	4F2 cell-surface antigen heavy chain isoform c [Homo sapiens]
	Query	Observed	Mr(expt)	Mr(calc)	ppm	Miss	Score	Expect	Rank	Unique	Peptide
	6531	579.7858	1157.5571	1157.5564	0.62	0	48	0.0031	1	U	R.EEGSPLELER.L
	6725	623.3016	1244.5886	1244.5884	0.14	0	84	1.1e-006	1	U	K.VAEDEAEAAAAAK.F
	6944	686.4226	1370.8305	1370.8286	1.46	0	49	0.00087	1	U	R.LLTSFLPAQLLR.L
	Proteins matching the same set of peptides:
	AAA35489.1 Mass: 58041 Score: 140 Matches: 3(3) Sequences: 3(3)
	4F2 heavy chain antigen [Homo sapiens]
	BAG65305.1 Mass: 55905 Score: 140 Matches: 3(3) Sequences: 3(3)
	unnamed protein product [Homo sapiens]
	NP_001012680.1 Mass: 68059 Score: 140 Matches: 3(3) Sequences: 3(3)
	4F2 cell-surface antigen heavy chain isoform b [Homo sapiens]
	NP_001012682.1 Mass: 61778 Score: 140 Matches: 3(3) Sequences: 3(3)
[truncated: 1,468 more rows]

## Sheet: 5
Database : NCBIprot 20220703 (490684465 sequences; 189905115401 residues)
[truncated: 2,751 more rows]

[truncated: 7 more sheets: 6, 7, 8, 9, 10, 11, 12]
